# Supplementary material
Source: publisher figshare collection journal article supplement (https://acs.figshare.com/ndownloader/files/3777670)
Supplement: Supplementary file 1 [file 3777670]

 
data_micn
 
_audit_creation_method            SHELXL-2013

data_mic
 
_audit_creation_method            SHELXL-2013

#===============================================================================
# 1. SUBMISSION DETAILS
_publ_contact_author_name      'Prof. Dr. Jin-Xiao Mi'
_publ_contact_author_address
;
Department of Materials Science and Engineering
College of Materials,
Xiamen University,
Xiamen 361005, Fujian Province
People's Republic of China
;
_publ_contact_author_phone     '0086-13696905136'
_publ_contact_author_fax       '0086-592-2183937'
_publ_contact_author_email     'jxmi@xmu.edu.cn'
_publ_requested_journal         ?
_publ_requested_category        ?
_publ_requested_coeditor_name   ?
_publ_contact_letter
;
Nov 21, 2014

Please consider this CIF submission for deposit ICSD. 
All authors have seen and approved this submission. 
The authors acknowledge the conditions of publication.

The CIF has passed the enCIFer(V1.1) checking.

Jin-Xiao Mi
;
#===============================================================================


_chemical_name_systematic
;
 ?
;
_chemical_name_common             ?
_chemical_melting_point           'not measured'
_chemical_formula_moiety          ?
_chemical_formula_sum
 'B4 H8.52 K2.67 Na1.33 O31.26 P6 V2' 
_chemical_formula_weight          974.56

loop_
 _atom_type_symbol
 _atom_type_description
 _atom_type_scat_dispersion_real
 _atom_type_scat_dispersion_imag
 _atom_type_scat_source
 'O'  'O'   0.0106   0.0060
 'International Tables Vol C Tables 4.2.6.8 and 6.1.1.4'
 'P'  'P'   0.1023   0.0942
 'International Tables Vol C Tables 4.2.6.8 and 6.1.1.4'
 'K'  'K'   0.2009   0.2494
 'International Tables Vol C Tables 4.2.6.8 and 6.1.1.4'
 'V'  'V'   0.3005   0.5294
 'International Tables Vol C Tables 4.2.6.8 and 6.1.1.4'
 'B'  'B'   0.0013   0.0007
 'International Tables Vol C Tables 4.2.6.8 and 6.1.1.4'
 'Na'  'Na'   0.0362   0.0249
 'International Tables Vol C Tables 4.2.6.8 and 6.1.1.4'
 'H'  'H'   0.0000   0.0000
 'International Tables Vol C Tables 4.2.6.8 and 6.1.1.4'
 
_space_group_crystal_system       cubic
_space_group_IT_number            197
_space_group_name_H-M_alt         'I 2 3'
_space_group_name_Hall            'I 2 2 3'
 
_shelx_space_group_comment
;
The symmetry employed for this shelxl refinement is uniquely defined
by the following loop, which should always be used as a source of
symmetry information in preference to the above space-group names.
They are only intended as comments.
;
 
loop_
 _space_group_symop_operation_xyz
 'x, y, z'
 '-x, -y, z'
 '-x, y, -z'
 'x, -y, -z'
 'z, x, y'
 'z, -x, -y'
 '-z, -x, y'
 '-z, x, -y'
 'y, z, x'
 '-y, z, -x'
 'y, -z, -x'
 '-y, -z, x'
 'x+1/2, y+1/2, z+1/2'
 '-x+1/2, -y+1/2, z+1/2'
 '-x+1/2, y+1/2, -z+1/2'
 'x+1/2, -y+1/2, -z+1/2'
 'z+1/2, x+1/2, y+1/2'
 'z+1/2, -x+1/2, -y+1/2'
 '-z+1/2, -x+1/2, y+1/2'
 '-z+1/2, x+1/2, -y+1/2'
 'y+1/2, z+1/2, x+1/2'
 '-y+1/2, z+1/2, -x+1/2'
 'y+1/2, -z+1/2, -x+1/2'
 '-y+1/2, -z+1/2, x+1/2'
 
_cell_length_a                    19.985(2)
_cell_length_b                    19.985(2)
_cell_length_c                    19.985(2)
_cell_angle_alpha                 90
_cell_angle_beta                  90
_cell_angle_gamma                 90
_cell_volume                      7982(3)
_cell_formula_units_Z             12
_cell_measurement_temperature     173(2)
_cell_measurement_reflns_used     ? 
_cell_measurement_theta_min       ? 
_cell_measurement_theta_max       ? 
 
_exptl_crystal_description        cube 
_exptl_crystal_colour             light-blue 
_exptl_crystal_density_meas       ? 
_exptl_crystal_density_method     'not measured'              
_exptl_crystal_density_diffrn     2.433          
_exptl_crystal_F_000              5759
_exptl_transmission_factor_min    ?                                             
_exptl_transmission_factor_max    ?                                             
_exptl_crystal_size_max           0.150
_exptl_crystal_size_mid           0.150
_exptl_crystal_size_min           0.150
_exptl_absorpt_coefficient_mu     1.633
_shelx_estimated_absorpt_T_min    0.792
_shelx_estimated_absorpt_T_max    0.792
_exptl_absorpt_correction_type    multi-scan 
_exptl_absorpt_correction_T_min   0.92714 
_exptl_absorpt_correction_T_max   1.00000 
_exptl_absorpt_process_details    ? 
 
_exptl_special_details
;
CrysAlisPro, Agilent Technologies,
Version 1.171.36.24 (release 03-12-2012 CrysAlis171 .NET)
(compiled Dec  3 2012,18:21:49)
Empirical absorption correction using spherical harmonics,
 implemented in SCALE3 ABSPACK scaling algorithm.
;
 
_diffrn_ambient_temperature       173(2)
_diffrn_radiation_wavelength      0.71073
_diffrn_radiation_type            MoK\a
_diffrn_source                    'Enhance (Mo) X-ray Source'                       
_diffrn_measurement_device_type   'Xcalibur, Sapphire3, Gemini ultra' 
_diffrn_measurement_method        '\w scans' 
_diffrn_detector_area_resol_mean  16.1903 
_diffrn_reflns_number             16228
_diffrn_reflns_av_unetI/netI      0.0149
_diffrn_reflns_av_R_equivalents   0.0173
_diffrn_reflns_limit_h_min        -26
_diffrn_reflns_limit_h_max        12
_diffrn_reflns_limit_k_min        -28
_diffrn_reflns_limit_k_max        26
_diffrn_reflns_limit_l_min        -28
_diffrn_reflns_limit_l_max        16
_diffrn_reflns_theta_min          3.532
_diffrn_reflns_theta_max          30.899
_diffrn_reflns_theta_full         25.242
_diffrn_measured_fraction_theta_max   0.956
_diffrn_measured_fraction_theta_full  0.995
_diffrn_reflns_Laue_measured_fraction_max    0.956
_diffrn_reflns_Laue_measured_fraction_full   0.995
_diffrn_reflns_point_group_measured_fraction_max   0.956
_diffrn_reflns_point_group_measured_fraction_full  0.997
_reflns_number_total              3920
_reflns_number_gt                 3873
_reflns_threshold_expression      'I > 2\s(I)'
_reflns_Friedel_coverage          0.854
_reflns_Friedel_fraction_max      0.956
_reflns_Friedel_fraction_full     0.999
 
_reflns_special_details
;
 Reflections were merged by SHELXL according to the crystal
 class for the calculation of statistics and refinement.
 
 _reflns_Friedel_fraction is defined as the number of unique
 Friedel pairs measured divided by the number that would be
 possible theoretically, ignoring centric projections and
 systematic absences.
;
 
_computing_data_collection        
;
CrysAlisPro, Agilent Technologies,
Version 1.171.36.24 (release 03-12-2012 CrysAlis171 .NET)
;
_computing_cell_refinement        
;
CrysAlisPro, Agilent Technologies,
Version 1.171.36.24 (release 03-12-2012 CrysAlis171 .NET)
;
_computing_data_reduction         
;
CrysAlisPro, Agilent Technologies,
Version 1.171.36.24 (release 03-12-2012 CrysAlis171 .NET)
;
_computing_structure_solution     'SHELXL-2013 (Sheldrick, 2013)'
_computing_structure_refinement   'SHELXL-2013 (Sheldrick, 2013)'
_computing_molecular_graphics     'SHELXL-2013 (Sheldrick, 2013)'
_computing_publication_material   'SHELXL-2013 (Sheldrick, 2013)'
 
_refine_special_details
;
 Refined as a 2-component inversion twin.
;
_refine_ls_structure_factor_coef  Fsqd
_refine_ls_matrix_type            full
_refine_ls_weighting_scheme       calc
_refine_ls_weighting_details
;
 w=1/[\s^2^(Fo^2^)+(0.0476P)^2^+21.4408P]
 where P=(Fo^2^+2Fc^2^)/3
;
_atom_sites_solution_primary      direct
_atom_sites_solution_secondary    difmap
_atom_sites_solution_hydrogens    .
_refine_ls_hydrogen_treatment     undef
_refine_ls_extinction_method      none
_refine_ls_extinction_coef        .
_refine_ls_abs_structure_details
;
 Refined as an inversion twin.
;
_refine_ls_abs_structure_Flack    0.00(3)
_chemical_absolute_configuration  ad
_refine_ls_number_reflns          3920
_refine_ls_number_parameters      225
_refine_ls_number_restraints      0
_refine_ls_R_factor_all           0.0280
_refine_ls_R_factor_gt            0.0275
_refine_ls_wR_factor_ref          0.0783
_refine_ls_wR_factor_gt           0.0779
_refine_ls_goodness_of_fit_ref    1.093
_refine_ls_restrained_S_all       1.093
_refine_ls_shift/su_max           0.000
_refine_ls_shift/su_mean          0.000
 
loop_
 _atom_site_label
 _atom_site_type_symbol
 _atom_site_fract_x
 _atom_site_fract_y
 _atom_site_fract_z
 _atom_site_U_iso_or_equiv
 _atom_site_adp_type
 _atom_site_occupancy
 _atom_site_site_symmetry_order  
 _atom_site_calc_flag
 _atom_site_refinement_flags_posn
 _atom_site_refinement_flags_adp
 _atom_site_refinement_flags_occupancy
 _atom_site_disorder_assembly
 _atom_site_disorder_group
V1 V 0.12738(2) 0.49662(3) 0.13340(3) 0.00372(11) Uani 1 1 d . . . . .
P1 P 0.26159(4) 0.59418(4) 0.12240(4) 0.00446(15) Uani 1 1 d . . . . .
P2 P 0.11211(4) 0.60987(4) 0.24984(4) 0.00427(15) Uani 1 1 d . . . . .
P3 P 0.31120(5) 0.47308(4) 0.32487(4) 0.00810(16) Uani 1 1 d . . . . .
B1 B 0.23472(18) 0.54710(17) 0.24489(17) 0.0051(6) Uani 1 1 d . . . . .
B2 B 0.22454(17) 0.42104(18) 0.23876(18) 0.0052(6) Uani 1 1 d . . . . .
O1 O 0.07625(12) 0.50530(14) 0.07314(12) 0.0086(4) Uani 1 1 d . . . . .
O2 O 0.19499(12) 0.56429(13) 0.10146(12) 0.0078(4) Uani 1 1 d . . . . .
O3 O 0.08580(13) 0.56492(12) 0.19456(12) 0.0072(4) Uani 1 1 d . . . . .
O4 O 0.07513(12) 0.42742(12) 0.18408(13) 0.0074(4) Uani 1 1 d . . . . .
O5 O 0.18440(13) 0.42305(13) 0.09360(12) 0.0078(4) Uani 1 1 d . . . . .
O6 O 0.19777(11) 0.48720(11) 0.22636(11) 0.0052(4) Uani 1 1 d . . . . .
O7 O 0.17143(11) 0.37020(12) 0.24315(12) 0.0057(4) Uani 1 1 d . . . . .
O8 O 0.09952(12) 0.68342(11) 0.22877(11) 0.0057(4) Uani 1 1 d . . . . .
O9 O 0.28285(12) 0.56719(12) 0.19188(12) 0.0060(4) Uani 1 1 d . . . . .
O10 O 0.18865(12) 0.60348(12) 0.25753(12) 0.0061(4) Uani 1 1 d . . . . .
O11 O 0.27400(12) 0.53887(12) 0.30701(12) 0.0063(4) Uani 1 1 d . . . . .
O12 O 0.26433(12) 0.41545(12) 0.30057(11) 0.0062(4) Uani 1 1 d . . . . .
O13 O 0.32388(14) 0.46818(13) 0.39791(13) 0.0131(5) Uani 1 1 d . . . . .
O14 O 0.37685(13) 0.47332(14) 0.28279(14) 0.0140(5) Uani 1 1 d . . . . .
Na1 Na 0.24316(10) 0.5000 0.0000 0.0096(3) Uani 1 2 d S T P . .
Na2 Na 0.4082(3) 0.4684(4) 0.5033(4) 0.0304(13) Uani 0.1667 1 d . . P . .
OW4 O 0.4082(3) 0.4684(4) 0.5033(4) 0.0304(13) Uani 0.25 1 d . . P . .
K1 K 0.26117(5) 0.26117(5) 0.26117(5) 0.0231(3) Uani 1 3 d S T P . .
K2 K 0.60026(4) 0.52400(5) 0.14291(5) 0.01979(18) Uani 1 1 d . . . . .
OW1 O 0.47682(17) 0.58721(16) 0.16159(17) 0.0229(6) Uani 1 1 d . . . . .
OW2 O 0.1843(3) 0.1843(3) 0.1843(3) 0.028(3) Uani 0.64(3) 3 d S T . . .
OW3 O 0.4458(5) 0.4458(5) 0.5542(5) 0.085(8) Uani 0.5 3 d S T P . .
 
loop_
 _atom_site_aniso_label
 _atom_site_aniso_U_11
 _atom_site_aniso_U_22
 _atom_site_aniso_U_33
 _atom_site_aniso_U_23
 _atom_site_aniso_U_13
 _atom_site_aniso_U_12
V1 0.0035(2) 0.0042(2) 0.0034(2) -0.00003(18) -0.00017(16) 0.00030(18)
P1 0.0051(3) 0.0039(3) 0.0044(3) 0.0006(3) 0.0004(3) -0.0008(3)
P2 0.0044(3) 0.0040(3) 0.0044(3) -0.0011(3) 0.0006(3) 0.0010(3)
P3 0.0090(4) 0.0075(3) 0.0078(3) 0.0015(3) -0.0024(3) 0.0000(3)
B1 0.0045(13) 0.0062(13) 0.0047(13) 0.0003(11) 0.0013(11) 0.0019(11)
B2 0.0036(13) 0.0062(13) 0.0059(13) 0.0012(11) -0.0011(11) -0.0008(11)
O1 0.0074(9) 0.0119(11) 0.0064(10) 0.0002(9) -0.0007(8) 0.0003(9)
O2 0.0066(10) 0.0092(10) 0.0075(10) 0.0032(8) -0.0021(8) -0.0056(9)
O3 0.0064(10) 0.0075(10) 0.0076(10) -0.0030(8) -0.0007(8) 0.0004(8)
O4 0.0065(10) 0.0069(10) 0.0087(10) 0.0035(9) -0.0002(8) -0.0008(8)
O5 0.0084(10) 0.0085(10) 0.0065(10) -0.0025(8) -0.0011(8) 0.0028(8)
O6 0.0053(9) 0.0047(10) 0.0056(9) 0.0005(7) 0.0004(7) 0.0003(8)
O7 0.0036(9) 0.0051(9) 0.0083(10) 0.0018(8) -0.0005(8) -0.0004(8)
O8 0.0082(10) 0.0048(9) 0.0040(10) -0.0005(8) 0.0001(8) 0.0013(8)
O9 0.0058(10) 0.0064(10) 0.0056(9) 0.0013(8) 0.0005(8) 0.0001(8)
O10 0.0040(9) 0.0058(9) 0.0085(10) -0.0009(8) -0.0010(8) 0.0011(8)
O11 0.0076(10) 0.0058(10) 0.0056(9) 0.0000(8) -0.0033(8) 0.0011(8)
O12 0.0077(10) 0.0049(9) 0.0060(10) 0.0013(8) -0.0025(8) -0.0006(8)
O13 0.0196(12) 0.0115(11) 0.0082(11) 0.0022(9) -0.0066(10) -0.0027(10)
O14 0.0099(11) 0.0149(11) 0.0171(12) 0.0046(10) 0.0017(10) 0.0017(10)
Na1 0.0142(9) 0.0067(7) 0.0079(8) -0.0010(7) 0.000 0.000
Na2 0.017(2) 0.048(4) 0.026(3) -0.010(3) 0.010(3) -0.007(2)
OW4 0.017(2) 0.048(4) 0.026(3) -0.010(3) 0.010(3) -0.007(2)
K1 0.0231(3) 0.0231(3) 0.0231(3) 0.0121(4) 0.0121(4) 0.0121(4)
K2 0.0165(4) 0.0225(4) 0.0204(4) 0.0042(3) 0.0021(3) -0.0019(3)
OW1 0.0280(16) 0.0177(13) 0.0231(15) -0.0017(12) -0.0071(12) 0.0046(12)
OW2 0.028(3) 0.028(3) 0.028(3) 0.006(2) 0.006(2) 0.006(2)
OW3 0.085(8) 0.085(8) 0.085(8) 0.031(6) 0.031(6) -0.031(6)
 
_geom_special_details
;
 All esds (except the esd in the dihedral angle between two l.s. planes)
 are estimated using the full covariance matrix.  The cell esds are taken
 into account individually in the estimation of esds in distances, angles
 and torsion angles; correlations between esds in cell parameters are only
 used when they are defined by crystal symmetry.  An approximate (isotropic)
 treatment of cell esds is used for estimating esds involving l.s. planes.
;
 
loop_
 _geom_bond_atom_site_label_1
 _geom_bond_atom_site_label_2
 _geom_bond_distance
 _geom_bond_site_symmetry_2
 _geom_bond_publ_flag
V1 O1 1.589(2) . ?
V1 O4 2.007(2) . ?
V1 O3 2.012(2) . ?
V1 O2 2.015(2) . ?
V1 O5 2.023(2) . ?
V1 O6 2.338(2) . ?
V1 Na1 3.5307(15) . ?
V1 Na1 3.5455(16) 22 ?
V1 K2 3.6407(11) 21_454 ?
P1 O2 1.518(2) . ?
P1 O4 1.522(3) 20 ?
P1 O9 1.549(3) . ?
P1 O7 1.554(2) 20 ?
P1 Na1 3.1083(9) . ?
P1 K2 3.6564(13) 2_665 ?
P2 O3 1.518(3) . ?
P2 O5 1.525(3) 22 ?
P2 O10 1.543(2) . ?
P2 O8 1.550(2) . ?
P2 Na1 3.1402(9) 22 ?
P2 K2 3.5318(12) 21_454 ?
P3 O13 1.485(3) . ?
P3 O11 1.552(2) . ?
P3 O14 1.558(3) . ?
P3 O12 1.562(3) . ?
B1 O6 1.454(4) . ?
B1 O10 1.477(4) . ?
B1 O11 1.478(4) . ?
B1 O9 1.486(4) . ?
B2 O6 1.448(4) . ?
B2 O7 1.472(4) . ?
B2 O12 1.473(4) . ?
B2 O8 1.504(4) 19_554 ?
B2 K1 3.308(4) . ?
O1 K2 2.991(3) 21_454 ?
O2 Na1 2.586(3) . ?
O3 Na1 2.484(3) 22 ?
O3 K2 2.740(3) 21_454 ?
O4 P1 1.522(3) 23_455 ?
O4 Na1 2.544(3) 22 ?
O4 K2 2.951(3) 24_554 ?
O5 P2 1.525(3) 19_554 ?
O5 Na1 2.691(3) . ?
O7 P1 1.554(2) 23_455 ?
O7 K1 2.845(2) . ?
O8 B2 1.504(4) 22 ?
O8 K2 3.087(2) 21_454 ?
O8 K1 3.195(2) 15 ?
O9 K2 3.120(3) 2_665 ?
O10 K1 3.328(3) 15 ?
O12 K1 3.183(3) . ?
O13 Na2 2.698(8) . ?
O13 Na2 2.889(7) 4_566 ?
O13 Na2 2.979(7) 9 ?
O14 K2 2.833(3) 2_665 ?
Na1 O3 2.485(3) 20 ?
Na1 O3 2.485(3) 19_554 ?
Na1 O4 2.544(3) 20 ?
Na1 O4 2.544(3) 19_554 ?
Na1 O2 2.586(3) 4_565 ?
Na1 O5 2.691(3) 4_565 ?
Na1 P1 3.1083(9) 4_565 ?
Na1 P2 3.1402(9) 19_554 ?
Na1 P2 3.1402(9) 20 ?
Na2 OW4 1.272(14) 4_566 ?
Na2 Na2 1.272(14) 4_566 ?
Na2 OW3 1.342(10) . ?
Na2 OW3 2.197(13) 4_566 ?
Na2 OW4 2.211(13) 8_656 ?
Na2 Na2 2.211(13) 8_656 ?
Na2 OW4 2.211(13) 11_566 ?
Na2 Na2 2.211(13) 11_566 ?
Na2 OW4 2.355(10) 5 ?
Na2 Na2 2.355(10) 5 ?
Na2 OW4 2.355(10) 9 ?
Na2 Na2 2.355(10) 9 ?
K1 OW2 2.660(11) . ?
K1 O7 2.845(2) 9 ?
K1 O7 2.845(2) 5 ?
K1 O12 3.183(3) 9 ?
K1 O12 3.183(3) 5 ?
K1 O8 3.195(2) 23_455 ?
K1 O8 3.195(2) 19_554 ?
K1 O8 3.195(2) 15_545 ?
K1 B2 3.308(4) 9 ?
K1 B2 3.308(4) 5 ?
K2 OW1 2.730(3) 2_665 ?
K2 O3 2.740(3) 17_554 ?
K2 OW1 2.797(3) . ?
K2 O14 2.833(3) 2_665 ?
K2 O4 2.951(3) 18 ?
K2 O1 2.991(3) 17_554 ?
K2 O8 3.087(2) 17_554 ?
K2 O9 3.120(3) 2_665 ?
K2 P2 3.5317(12) 17_554 ?
K2 V1 3.6406(11) 17_554 ?
K2 P1 3.6563(13) 2_665 ?
K2 K2 4.1205(18) 2_665 ?
OW1 K2 2.730(3) 2_665 ?
OW3 OW4 1.342(10) 11_566 ?
OW3 Na2 1.342(10) 11_566 ?
OW3 OW4 1.342(10) 8_656 ?
OW3 Na2 1.342(10) 8_656 ?
OW3 Na2 2.197(13) 10_656 ?
OW3 Na2 2.197(13) 5 ?
OW3 Na2 2.197(13) 4_566 ?
 
loop_
 _geom_angle_atom_site_label_1
 _geom_angle_atom_site_label_2
 _geom_angle_atom_site_label_3
 _geom_angle
 _geom_angle_site_symmetry_1
 _geom_angle_site_symmetry_3
 _geom_angle_publ_flag
O1 V1 O4 97.07(12) . . ?
O1 V1 O3 96.94(12) . . ?
O4 V1 O3 86.90(10) . . ?
O1 V1 O2 96.77(12) . . ?
O4 V1 O2 166.14(10) . . ?
O3 V1 O2 90.80(10) . . ?
O1 V1 O5 98.26(12) . . ?
O4 V1 O5 89.46(10) . . ?
O3 V1 O5 164.70(10) . . ?
O2 V1 O5 89.17(10) . . ?
O1 V1 O6 176.43(11) . . ?
O4 V1 O6 81.75(9) . . ?
O3 V1 O6 79.65(9) . . ?
O2 V1 O6 84.39(9) . . ?
O5 V1 O6 85.12(9) . . ?
O1 V1 Na1 81.21(9) . . ?
O4 V1 Na1 137.32(8) . . ?
O3 V1 Na1 135.76(8) . . ?
O2 V1 Na1 46.27(7) . . ?
O5 V1 Na1 49.30(7) . . ?
O6 V1 Na1 101.96(6) . . ?
O1 V1 Na1 93.64(9) . 22 ?
O4 V1 Na1 44.64(7) . 22 ?
O3 V1 Na1 42.93(7) . 22 ?
O2 V1 Na1 133.54(8) . 22 ?
O5 V1 Na1 133.77(8) . 22 ?
O6 V1 Na1 83.15(6) . 22 ?
Na1 V1 Na1 174.595(17) . 22 ?
O1 V1 K2 53.81(10) . 21_454 ?
O4 V1 K2 110.48(7) . 21_454 ?
O3 V1 K2 48.04(7) . 21_454 ?
O2 V1 K2 77.53(8) . 21_454 ?
O5 V1 K2 146.28(7) . 21_454 ?
O6 V1 K2 123.42(6) . 21_454 ?
Na1 V1 K2 102.66(2) . 21_454 ?
Na1 V1 K2 72.77(2) 22 21_454 ?
O2 P1 O4 110.30(14) . 20 ?
O2 P1 O9 110.53(14) . . ?
O4 P1 O9 107.68(14) 20 . ?
O2 P1 O7 111.34(14) . 20 ?
O4 P1 O7 110.76(13) 20 20 ?
O9 P1 O7 106.10(13) . 20 ?
O2 P1 Na1 56.00(10) . . ?
O4 P1 Na1 54.41(10) 20 . ?
O9 P1 Na1 121.81(10) . . ?
O7 P1 Na1 132.02(10) 20 . ?
O2 P1 K2 116.03(10) . 2_665 ?
O4 P1 K2 51.16(10) 20 2_665 ?
O9 P1 K2 57.82(9) . 2_665 ?
O7 P1 K2 132.62(10) 20 2_665 ?
Na1 P1 K2 77.68(4) . 2_665 ?
O3 P2 O5 109.96(14) . 22 ?
O3 P2 O10 111.53(14) . . ?
O5 P2 O10 110.69(14) 22 . ?
O3 P2 O8 107.90(13) . . ?
O5 P2 O8 111.19(13) 22 . ?
O10 P2 O8 105.46(14) . . ?
O3 P2 Na1 51.05(11) . 22 ?
O5 P2 Na1 58.93(11) 22 22 ?
O10 P2 Na1 130.18(10) . 22 ?
O8 P2 Na1 124.02(10) . 22 ?
O3 P2 K2 47.30(10) . 21_454 ?
O5 P2 K2 122.64(11) 22 21_454 ?
O10 P2 K2 126.46(10) . 21_454 ?
O8 P2 K2 60.77(9) . 21_454 ?
Na1 P2 K2 79.20(4) 22 21_454 ?
O13 P3 O11 111.33(15) . . ?
O13 P3 O14 112.78(16) . . ?
O11 P3 O14 106.06(15) . . ?
O13 P3 O12 111.05(14) . . ?
O11 P3 O12 105.42(13) . . ?
O14 P3 O12 109.83(15) . . ?
O6 B1 O10 110.8(3) . . ?
O6 B1 O11 113.1(3) . . ?
O10 B1 O11 105.8(3) . . ?
O6 B1 O9 111.7(3) . . ?
O10 B1 O9 108.6(3) . . ?
O11 B1 O9 106.6(3) . . ?
O6 B2 O7 112.0(3) . . ?
O6 B2 O12 114.3(3) . . ?
O7 B2 O12 106.7(3) . . ?
O6 B2 O8 110.7(3) . 19_554 ?
O7 B2 O8 107.6(3) . 19_554 ?
O12 B2 O8 105.1(2) . 19_554 ?
O6 B2 K1 170.8(2) . . ?
O7 B2 K1 58.99(15) . . ?
O12 B2 K1 72.18(16) . . ?
O8 B2 K1 72.45(16) 19_554 . ?
V1 O1 K2 100.81(12) . 21_454 ?
P1 O2 V1 139.88(16) . . ?
P1 O2 Na1 94.89(12) . . ?
V1 O2 Na1 99.47(10) . . ?
P2 O3 V1 134.48(16) . . ?
P2 O3 Na1 100.58(13) . 22 ?
V1 O3 Na1 103.60(11) . 22 ?
P2 O3 K2 108.67(13) . 21_454 ?
V1 O3 K2 98.87(10) . 21_454 ?
Na1 O3 K2 109.30(10) 22 21_454 ?
P1 O4 V1 132.90(15) 23_455 . ?
P1 O4 Na1 96.48(13) 23_455 22 ?
V1 O4 Na1 101.69(10) . 22 ?
P1 O4 K2 105.15(12) 23_455 24_554 ?
V1 O4 K2 113.02(10) . 24_554 ?
Na1 O4 K2 101.53(8) 22 24_554 ?
P2 O5 V1 137.41(16) 19_554 . ?
P2 O5 Na1 92.03(12) 19_554 . ?
V1 O5 Na1 95.95(10) . . ?
B2 O6 B1 121.4(3) . . ?
B2 O6 V1 115.59(19) . . ?
B1 O6 V1 116.20(18) . . ?
B2 O7 P1 130.3(2) . 23_455 ?
B2 O7 K1 94.69(17) . . ?
P1 O7 K1 134.99(13) 23_455 . ?
B2 O8 P2 125.0(2) 22 . ?
B2 O8 K2 125.12(18) 22 21_454 ?
P2 O8 K2 93.25(10) . 21_454 ?
B2 O8 K1 80.88(16) 22 15 ?
P2 O8 K1 107.62(12) . 15 ?
K2 O8 K1 127.30(8) 21_454 15 ?
B1 O9 P1 123.7(2) . . ?
B1 O9 K2 123.39(18) . 2_665 ?
P1 O9 K2 97.34(11) . 2_665 ?
B1 O10 P2 131.6(2) . . ?
B1 O10 K1 121.03(18) . 15 ?
P2 O10 K1 102.08(11) . 15 ?
B1 O11 P3 122.8(2) . . ?
B2 O12 P3 121.9(2) . . ?
B2 O12 K1 81.68(17) . . ?
P3 O12 K1 143.43(13) . . ?
P3 O13 Na2 150.9(2) . . ?
P3 O13 Na2 137.9(2) . 4_566 ?
Na2 O13 Na2 26.0(3) . 4_566 ?
P3 O13 Na2 102.57(17) . 9 ?
Na2 O13 Na2 48.7(2) . 9 ?
Na2 O13 Na2 44.3(3) 4_566 9 ?
P3 O14 K2 131.95(15) . 2_665 ?
O3 Na1 O3 119.87(14) 20 19_554 ?
O3 Na1 O4 66.67(8) 20 20 ?
O3 Na1 O4 79.83(9) 19_554 20 ?
O3 Na1 O4 79.83(9) 20 19_554 ?
O3 Na1 O4 66.67(8) 19_554 19_554 ?
O4 Na1 O4 110.29(14) 20 19_554 ?
O3 Na1 O2 96.89(8) 20 4_565 ?
O3 Na1 O2 104.65(8) 19_554 4_565 ?
O4 Na1 O2 162.35(10) 20 4_565 ?
O4 Na1 O2 58.17(7) 19_554 4_565 ?
O3 Na1 O2 104.65(8) 20 . ?
O3 Na1 O2 96.89(8) 19_554 . ?
O4 Na1 O2 58.17(7) 20 . ?
O4 Na1 O2 162.35(10) 19_554 . ?
O2 Na1 O2 136.29(13) 4_565 . ?
O3 Na1 O5 57.41(8) 20 4_565 ?
O3 Na1 O5 167.40(8) 19_554 4_565 ?
O4 Na1 O5 107.96(8) 20 4_565 ?
O4 Na1 O5 100.98(8) 19_554 4_565 ?
O2 Na1 O5 64.95(8) 4_565 4_565 ?
O2 Na1 O5 95.66(9) . 4_565 ?
O3 Na1 O5 167.40(8) 20 . ?
O3 Na1 O5 57.40(8) 19_554 . ?
O4 Na1 O5 100.98(8) 20 . ?
O4 Na1 O5 107.96(8) 19_554 . ?
O2 Na1 O5 95.66(9) 4_565 . ?
O2 Na1 O5 64.95(8) . . ?
O5 Na1 O5 128.25(13) 4_565 . ?
O3 Na1 P1 87.00(6) 20 4_565 ?
O3 Na1 P1 86.19(6) 19_554 4_565 ?
O4 Na1 P1 137.59(10) 20 4_565 ?
O4 Na1 P1 29.10(6) 19_554 4_565 ?
O2 Na1 P1 29.11(5) 4_565 4_565 ?
O2 Na1 P1 164.13(9) . 4_565 ?
O5 Na1 P1 81.42(6) 4_565 4_565 ?
O5 Na1 P1 104.63(6) . 4_565 ?
O3 Na1 P1 86.20(6) 20 . ?
O3 Na1 P1 87.00(6) 19_554 . ?
O4 Na1 P1 29.10(6) 20 . ?
O4 Na1 P1 137.59(10) 19_554 . ?
O2 Na1 P1 164.13(9) 4_565 . ?
O2 Na1 P1 29.11(5) . . ?
O5 Na1 P1 104.63(6) 4_565 . ?
O5 Na1 P1 81.42(6) . . ?
P1 Na1 P1 166.39(8) 4_565 . ?
O3 Na1 P2 146.64(10) 20 19_554 ?
O3 Na1 P2 28.37(6) 19_554 19_554 ?
O4 Na1 P2 89.83(6) 20 19_554 ?
O4 Na1 P2 87.25(6) 19_554 19_554 ?
O2 Na1 P2 102.14(6) 4_565 19_554 ?
O2 Na1 P2 79.80(6) . 19_554 ?
O5 Na1 P2 155.94(9) 4_565 19_554 ?
O5 Na1 P2 29.04(5) . 19_554 ?
P1 Na1 P2 96.48(2) 4_565 19_554 ?
P1 Na1 P2 82.91(2) . 19_554 ?
O3 Na1 P2 28.37(6) 20 20 ?
O3 Na1 P2 146.64(10) 19_554 20 ?
O4 Na1 P2 87.25(6) 20 20 ?
O4 Na1 P2 89.83(6) 19_554 20 ?
O2 Na1 P2 79.80(6) 4_565 20 ?
O2 Na1 P2 102.14(6) . 20 ?
O5 Na1 P2 29.04(5) 4_565 20 ?
O5 Na1 P2 155.94(9) . 20 ?
P1 Na1 P2 82.91(2) 4_565 20 ?
P1 Na1 P2 96.48(2) . 20 ?
P2 Na1 P2 174.89(8) 19_554 20 ?
OW4 Na2 Na2 0.0(8) 4_566 4_566 ?
OW4 Na2 OW3 114.4(8) 4_566 . ?
Na2 Na2 OW3 114.4(8) 4_566 . ?
OW4 Na2 OW3 33.8(5) 4_566 4_566 ?
Na2 Na2 OW3 33.8(5) 4_566 4_566 ?
OW3 Na2 OW3 117.8(12) . 4_566 ?
OW4 Na2 OW4 124.6(3) 4_566 8_656 ?
Na2 Na2 OW4 124.6(3) 4_566 8_656 ?
OW3 Na2 OW4 34.5(4) . 8_656 ?
OW3 Na2 OW4 106.6(4) 4_566 8_656 ?
OW4 Na2 Na2 124.6(3) 4_566 8_656 ?
Na2 Na2 Na2 124.6(3) 4_566 8_656 ?
OW3 Na2 Na2 34.5(4) . 8_656 ?
OW3 Na2 Na2 106.6(4) 4_566 8_656 ?
OW4 Na2 Na2 0.0(4) 8_656 8_656 ?
OW4 Na2 OW4 80.2(7) 4_566 11_566 ?
Na2 Na2 OW4 80.2(7) 4_566 11_566 ?
OW3 Na2 OW4 34.5(4) . 11_566 ?
OW3 Na2 OW4 91.9(4) 4_566 11_566 ?
OW4 Na2 OW4 60.000(1) 8_656 11_566 ?
Na2 Na2 OW4 60.000(1) 8_656 11_566 ?
OW4 Na2 Na2 80.2(7) 4_566 11_566 ?
Na2 Na2 Na2 80.2(7) 4_566 11_566 ?
OW3 Na2 Na2 34.5(4) . 11_566 ?
OW3 Na2 Na2 91.9(4) 4_566 11_566 ?
OW4 Na2 Na2 60.000(1) 8_656 11_566 ?
Na2 Na2 Na2 60.000(1) 8_656 11_566 ?
OW4 Na2 Na2 0.00(18) 11_566 11_566 ?
OW4 Na2 OW4 118.5(5) 4_566 5 ?
Na2 Na2 OW4 118.5(5) 4_566 5 ?
OW3 Na2 OW4 66.5(6) . 5 ?
OW3 Na2 OW4 88.1(4) 4_566 5 ?
OW4 Na2 OW4 32.1(4) 8_656 5 ?
Na2 Na2 OW4 32.1(4) 8_656 5 ?
OW4 Na2 OW4 85.9(3) 11_566 5 ?
Na2 Na2 OW4 85.9(3) 11_566 5 ?
OW4 Na2 Na2 118.5(5) 4_566 5 ?
Na2 Na2 Na2 118.5(5) 4_566 5 ?
OW3 Na2 Na2 66.5(6) . 5 ?
OW3 Na2 Na2 88.1(4) 4_566 5 ?
OW4 Na2 Na2 32.1(4) 8_656 5 ?
Na2 Na2 Na2 32.1(4) 8_656 5 ?
OW4 Na2 Na2 85.9(3) 11_566 5 ?
Na2 Na2 Na2 85.9(3) 11_566 5 ?
OW4 Na2 Na2 0.0(4) 5 5 ?
OW4 Na2 OW4 67.7(7) 4_566 9 ?
Na2 Na2 OW4 67.7(7) 4_566 9 ?
OW3 Na2 OW4 115.2(8) . 9 ?
OW3 Na2 OW4 34.1(3) 4_566 9 ?
OW4 Na2 OW4 87.7(4) 8_656 9 ?
Na2 Na2 OW4 87.7(4) 8_656 9 ?
OW4 Na2 OW4 106.97(13) 11_566 9 ?
Na2 Na2 OW4 106.97(13) 11_566 9 ?
OW4 Na2 OW4 60.000(1) 5 9 ?
Na2 Na2 OW4 60.000(1) 5 9 ?
OW4 Na2 Na2 67.7(7) 4_566 9 ?
Na2 Na2 Na2 67.7(7) 4_566 9 ?
OW3 Na2 Na2 115.2(8) . 9 ?
OW3 Na2 Na2 34.1(3) 4_566 9 ?
OW4 Na2 Na2 87.7(4) 8_656 9 ?
Na2 Na2 Na2 87.7(4) 8_656 9 ?
OW4 Na2 Na2 106.97(13) 11_566 9 ?
Na2 Na2 Na2 106.97(13) 11_566 9 ?
OW4 Na2 Na2 60.000(1) 5 9 ?
Na2 Na2 Na2 60.000(1) 5 9 ?
OW4 Na2 Na2 0.00(17) 9 9 ?
OW2 K1 O7 90.30(6) . 9 ?
OW2 K1 O7 90.30(6) . 5 ?
O7 K1 O7 119.997(1) 9 5 ?
OW2 K1 O7 90.30(6) . . ?
O7 K1 O7 119.998(1) 9 . ?
O7 K1 O7 119.997(1) 5 . ?
OW2 K1 O12 135.53(5) . . ?
O7 K1 O12 105.27(7) 9 . ?
O7 K1 O12 115.07(7) 5 . ?
O7 K1 O12 45.73(7) . . ?
OW2 K1 O12 135.53(5) . 9 ?
O7 K1 O12 45.73(7) 9 9 ?
O7 K1 O12 105.27(7) 5 9 ?
O7 K1 O12 115.06(7) . 9 ?
O12 K1 O12 74.70(8) . 9 ?
OW2 K1 O12 135.53(5) . 5 ?
O7 K1 O12 115.06(7) 9 5 ?
O7 K1 O12 45.73(7) 5 5 ?
O7 K1 O12 105.27(7) . 5 ?
O12 K1 O12 74.70(8) . 5 ?
O12 K1 O12 74.70(8) 9 5 ?
OW2 K1 O8 104.99(5) . 23_455 ?
O7 K1 O8 158.41(8) 9 23_455 ?
O7 K1 O8 46.42(6) 5 23_455 ?
O7 K1 O8 75.85(6) . 23_455 ?
O12 K1 O8 74.52(6) . 23_455 ?
O12 K1 O8 115.99(8) 9 23_455 ?
O12 K1 O8 43.52(6) 5 23_455 ?
OW2 K1 O8 104.99(5) . 19_554 ?
O7 K1 O8 75.85(6) 9 19_554 ?
O7 K1 O8 158.41(8) 5 19_554 ?
O7 K1 O8 46.42(6) . 19_554 ?
O12 K1 O8 43.52(6) . 19_554 ?
O12 K1 O8 74.52(6) 9 19_554 ?
O12 K1 O8 115.99(8) 5 19_554 ?
O8 K1 O8 113.55(4) 23_455 19_554 ?
OW2 K1 O8 104.99(5) . 15_545 ?
O7 K1 O8 46.42(6) 9 15_545 ?
O7 K1 O8 75.85(6) 5 15_545 ?
O7 K1 O8 158.41(8) . 15_545 ?
O12 K1 O8 115.99(8) . 15_545 ?
O12 K1 O8 43.52(6) 9 15_545 ?
O12 K1 O8 74.52(6) 5 15_545 ?
O8 K1 O8 113.55(4) 23_455 15_545 ?
O8 K1 O8 113.55(4) 19_554 15_545 ?
OW2 K1 B2 110.59(7) . 9 ?
O7 K1 B2 26.32(7) 9 9 ?
O7 K1 B2 101.91(8) 5 9 ?
O7 K1 B2 133.19(8) . 9 ?
O12 K1 B2 99.59(9) . 9 ?
O12 K1 B2 26.15(7) 9 9 ?
O12 K1 B2 88.74(8) 5 9 ?
O8 K1 B2 132.15(8) 23_455 9 ?
O8 K1 B2 87.11(8) 19_554 9 ?
O8 K1 B2 26.67(7) 15_545 9 ?
OW2 K1 B2 110.59(7) . 5 ?
O7 K1 B2 133.19(8) 9 5 ?
O7 K1 B2 26.32(7) 5 5 ?
O7 K1 B2 101.91(8) . 5 ?
O12 K1 B2 88.74(8) . 5 ?
O12 K1 B2 99.59(9) 9 5 ?
O12 K1 B2 26.15(7) 5 5 ?
O8 K1 B2 26.67(7) 23_455 5 ?
O8 K1 B2 132.15(8) 19_554 5 ?
O8 K1 B2 87.11(8) 15_545 5 ?
B2 K1 B2 108.33(7) 9 5 ?
OW1 K2 O3 146.41(10) 2_665 17_554 ?
OW1 K2 OW1 81.47(10) 2_665 . ?
O3 K2 OW1 118.62(9) 17_554 . ?
OW1 K2 O14 88.37(10) 2_665 2_665 ?
O3 K2 O14 116.21(8) 17_554 2_665 ?
OW1 K2 O14 90.13(9) . 2_665 ?
OW1 K2 O4 80.73(9) 2_665 18 ?
O3 K2 O4 68.98(7) 17_554 18 ?
OW1 K2 O4 150.19(9) . 18 ?
O14 K2 O4 113.02(8) 2_665 18 ?
OW1 K2 O1 107.92(9) 2_665 17_554 ?
O3 K2 O1 56.23(7) 17_554 17_554 ?
OW1 K2 O1 78.77(9) . 17_554 ?
O14 K2 O1 158.40(8) 2_665 17_554 ?
O4 K2 O1 84.22(7) 18 17_554 ?
OW1 K2 O8 146.27(9) 2_665 17_554 ?
O3 K2 O8 49.95(7) 17_554 17_554 ?
OW1 K2 O8 118.55(9) . 17_554 ?
O14 K2 O8 66.27(7) 2_665 17_554 ?
O4 K2 O8 88.91(7) 18 17_554 ?
O1 K2 O8 102.78(7) 17_554 17_554 ?
OW1 K2 O9 84.50(9) 2_665 2_665 ?
O3 K2 O9 85.80(7) 17_554 2_665 ?
OW1 K2 O9 151.93(9) . 2_665 ?
O14 K2 O9 65.21(7) 2_665 2_665 ?
O4 K2 O9 48.11(6) 18 2_665 ?
O1 K2 O9 128.90(7) 17_554 2_665 ?
O8 K2 O9 65.20(6) 17_554 2_665 ?
OW1 K2 P2 155.39(8) 2_665 17_554 ?
O3 K2 P2 24.03(5) 17_554 17_554 ?
OW1 K2 P2 123.11(8) . 17_554 ?
O14 K2 P2 92.20(6) 2_665 17_554 ?
O4 K2 P2 76.42(5) 18 17_554 ?
O1 K2 P2 78.89(5) 17_554 17_554 ?
O8 K2 P2 25.98(4) 17_554 17_554 ?
O9 K2 P2 73.51(5) 2_665 17_554 ?
OW1 K2 V1 132.41(8) 2_665 17_554 ?
O3 K2 V1 33.09(5) 17_554 17_554 ?
OW1 K2 V1 90.64(8) . 17_554 ?
O14 K2 V1 138.78(7) 2_665 17_554 ?
O4 K2 V1 83.99(5) 18 17_554 ?
O1 K2 V1 25.38(5) 17_554 17_554 ?
O8 K2 V1 77.40(5) 17_554 17_554 ?
O9 K2 V1 116.56(5) 2_665 17_554 ?
P2 K2 V1 54.052(19) 17_554 17_554 ?
OW1 K2 P1 85.16(7) 2_665 2_665 ?
O3 K2 P1 73.03(6) 17_554 2_665 ?
OW1 K2 P1 166.62(8) . 2_665 ?
O14 K2 P1 90.05(6) 2_665 2_665 ?
O4 K2 P1 23.68(5) 18 2_665 ?
O1 K2 P1 105.03(5) 17_554 2_665 ?
O8 K2 P1 73.56(5) 17_554 2_665 ?
O9 K2 P1 24.85(5) 2_665 2_665 ?
P2 K2 P1 70.25(2) 17_554 2_665 ?
V1 K2 P1 98.00(3) 17_554 2_665 ?
OW1 K2 K2 42.41(7) 2_665 2_665 ?
O3 K2 K2 140.70(6) 17_554 2_665 ?
OW1 K2 K2 41.17(7) . 2_665 ?
O14 K2 K2 99.29(6) 2_665 2_665 ?
O4 K2 K2 113.32(6) 18 2_665 ?
O1 K2 K2 84.55(5) 17_554 2_665 ?
O8 K2 K2 157.36(6) 17_554 2_665 ?
O9 K2 K2 126.31(6) 2_665 2_665 ?
P2 K2 K2 159.92(4) 17_554 2_665 ?
V1 K2 K2 108.00(2) 17_554 2_665 ?
P1 K2 K2 125.73(4) 2_665 2_665 ?
K2 OW1 K2 96.41(10) 2_665 . ?
Na2 OW3 OW4 111.0(8) . 11_566 ?
Na2 OW3 Na2 111.0(8) . 11_566 ?
OW4 OW3 Na2 0.0(6) 11_566 11_566 ?
Na2 OW3 OW4 111.0(8) . 8_656 ?
OW4 OW3 OW4 111.0(8) 11_566 8_656 ?
Na2 OW3 OW4 111.0(8) 11_566 8_656 ?
Na2 OW3 Na2 111.0(8) . 8_656 ?
OW4 OW3 Na2 111.0(8) 11_566 8_656 ?
Na2 OW3 Na2 111.0(8) 11_566 8_656 ?
OW4 OW3 Na2 0.0(7) 8_656 8_656 ?
Na2 OW3 Na2 121.4(11) . 10_656 ?
OW4 OW3 Na2 31.8(5) 11_566 10_656 ?
Na2 OW3 Na2 31.8(5) 11_566 10_656 ?
OW4 OW3 Na2 79.4(7) 8_656 10_656 ?
Na2 OW3 Na2 79.4(7) 8_656 10_656 ?
Na2 OW3 Na2 79.4(7) . 5 ?
OW4 OW3 Na2 121.3(11) 11_566 5 ?
Na2 OW3 Na2 121.3(11) 11_566 5 ?
OW4 OW3 Na2 31.8(5) 8_656 5 ?
Na2 OW3 Na2 31.8(5) 8_656 5 ?
Na2 OW3 Na2 92.1(6) 10_656 5 ?
Na2 OW3 Na2 31.8(5) . 4_566 ?
OW4 OW3 Na2 79.4(7) 11_566 4_566 ?
Na2 OW3 Na2 79.4(7) 11_566 4_566 ?
OW4 OW3 Na2 121.3(11) 8_656 4_566 ?
Na2 OW3 Na2 121.3(11) 8_656 4_566 ?
Na2 OW3 Na2 92.1(6) 10_656 4_566 ?
Na2 OW3 Na2 92.1(6) 5 4_566 ?
 
_refine_diff_density_max    1.836
_refine_diff_density_min   -0.952
_refine_diff_density_rms    0.115

_shelxl_version_number 2013-2

_shelx_res_file
;
TITL 1 in I23
CELL 0.71073  19.9846  19.9846  19.9846  90.000  90.000  90.000
ZERR   12.00   0.0023   0.0023   0.0023   0.000   0.000   0.000
LATT -2
SYMM -X, -Y, Z
SYMM -X, Y, -Z
SYMM X, -Y, -Z
SYMM Z, X, Y
SYMM Z, -X, -Y
SYMM -Z, -X, Y
SYMM -Z, X, -Y
SYMM Y, Z, X
SYMM -Y, Z, -X
SYMM Y, -Z, -X
SYMM -Y, -Z, X
SFAC  O      P   K   V  B  Na  H
UNIT 375.09  72 32  24 48  16 102.18

L.S. 14
BOND
FMAP 2
PLAN 20
TEMP -100
ACTA
TWIN -1 0 0  0 -1 0  0 0 -1 2
SIZE 0.15 0.15 0.15
WGHT    0.047600   21.440800
BASF   0.00458
FVAR       0.78915   0.59509
MOLE 1
V1    4    0.127379    0.496621    0.133396    11.00000    0.00349    0.00422 =
         0.00345   -0.00003   -0.00017    0.00030
P1    2    0.261586    0.594184    0.122400    11.00000    0.00511    0.00388 =
         0.00440    0.00063    0.00039   -0.00075
P2    2    0.112114    0.609869    0.249840    11.00000    0.00444    0.00397 =
         0.00440   -0.00110    0.00062    0.00103
P3    2    0.311203    0.473083    0.324869    11.00000    0.00904    0.00750 =
         0.00777    0.00146   -0.00244    0.00003
B1    5    0.234715    0.547099    0.244895    11.00000    0.00446    0.00625 =
         0.00471    0.00027    0.00134    0.00189
B2    5    0.224539    0.421038    0.238755    11.00000    0.00357    0.00620 =
         0.00589    0.00118   -0.00108   -0.00080
O1    1    0.076249    0.505299    0.073140    11.00000    0.00742    0.01189 =
         0.00640    0.00016   -0.00065    0.00032
O2    1    0.194991    0.564294    0.101459    11.00000    0.00665    0.00918 =
         0.00746    0.00321   -0.00208   -0.00556
O3    1    0.085805    0.564920    0.194560    11.00000    0.00642    0.00753 =
         0.00762   -0.00296   -0.00066    0.00035
O4    1    0.075131    0.427423    0.184079    11.00000    0.00647    0.00690 =
         0.00872    0.00349   -0.00017   -0.00076
O5    1    0.184396    0.423047    0.093597    11.00000    0.00840    0.00851 =
         0.00645   -0.00251   -0.00106    0.00283
O6    1    0.197774    0.487199    0.226358    11.00000    0.00530    0.00466 =
         0.00565    0.00053    0.00036    0.00034
O7    1    0.171432    0.370196    0.243151    11.00000    0.00355    0.00505 =
         0.00835    0.00177   -0.00048   -0.00044
O8    1    0.099523    0.683419    0.228774    11.00000    0.00825    0.00484 =
         0.00405   -0.00047    0.00008    0.00134
O9    1    0.282853    0.567194    0.191877    11.00000    0.00579    0.00643 =
         0.00564    0.00133    0.00047    0.00013
O10   1    0.188650    0.603483    0.257527    11.00000    0.00402    0.00576 =
         0.00846   -0.00092   -0.00104    0.00106
O11   1    0.274002    0.538867    0.307009    11.00000    0.00759    0.00576 =
         0.00558    0.00002   -0.00329    0.00115
O12   1    0.264334    0.415450    0.300572    11.00000    0.00775    0.00488 =
         0.00597    0.00130   -0.00250   -0.00058
O13   1    0.323878    0.468175    0.397914    11.00000    0.01964    0.01150 =
         0.00825    0.00218   -0.00665   -0.00274
O14   1    0.376846    0.473318    0.282791    11.00000    0.00986    0.01489 =
         0.01714    0.00456    0.00174    0.00165
NA1   6    0.243162    0.500000    0.000000    10.50000    0.01425    0.00671 =
         0.00794   -0.00100    0.00000    0.00000
EADP NA2 OW4
EXYZ NA2 OW4
NA2   6    0.408210    0.468358    0.503326    10.16667    0.01726    0.04814 =
         0.02579   -0.01011    0.00956   -0.00710
OW4   1    0.408210    0.468358    0.503326    10.25000    0.01726    0.04814 =
         0.02579   -0.01011    0.00956   -0.00710

K1    3    0.261165    0.261165    0.261165    10.33333    0.02310    0.02310 =
         0.02310    0.01208    0.01208    0.01208
K2    3    0.600261    0.523996    0.142910    11.00000    0.01651    0.02245 =
         0.02040    0.00422    0.00209   -0.00194
OW1   1    0.476818    0.587214    0.161588    11.00000    0.02801    0.01771 =
         0.02311   -0.00167   -0.00713    0.00457
OW2   1    0.184326    0.184326    0.184326     0.21200    0.02775    0.02775 =
         0.02775    0.00638    0.00638    0.00638
OW3   1    0.445803    0.445803    0.554197    10.16667    0.08483    0.08483 =
         0.08483    0.03068    0.03068   -0.03068
HKLF 4

REM  1 in I23
REM R1 =  0.0275 for    3873 Fo > 4sig(Fo)  and  0.0280 for all    3920 data
REM    225 parameters refined using      0 restraints

END

WGHT      0.0475     21.4373

REM Highest difference peak  1.836,  deepest hole -0.952,  1-sigma level  0.115
Q1    1   0.0000  0.5678  0.0000  10.50000  0.05    1.84
Q2    1   0.4098  0.5901  0.2192  11.00000  0.05    1.28
Q3    1   0.4472  0.4472  0.4472  10.33333  0.05    0.73
Q4    1   0.4202  0.4503  0.5376  11.00000  0.05    0.67
Q5    1   0.4666  0.6028  0.1986  11.00000  0.05    0.45
Q6    1   0.4091  0.4194  0.2233  11.00000  0.05    0.43
Q7    1   0.0785  0.4085  0.2118  11.00000  0.05    0.41
Q8    1   0.5410  0.5860  0.1563  11.00000  0.05    0.41
Q9    1   0.1020  0.5772  0.2193  11.00000  0.05    0.41
Q10   1   0.0892  0.5889  0.2161  11.00000  0.05    0.41
Q11   1   0.4126  0.4358  0.2831  11.00000  0.05    0.40
Q12   1   0.2232  0.5813  0.1143  11.00000  0.05    0.39
Q13   1   0.4585  0.6207  0.1338  11.00000  0.05    0.37
Q14   1   0.2906  0.5153  0.3239  11.00000  0.05    0.36
Q15   1   0.2086  0.5830  0.2545  11.00000  0.05    0.36
Q16   1   0.2098  0.4212  0.0998  11.00000  0.05    0.36
Q17   1   0.3948  0.4269  0.2392  11.00000  0.05    0.36
Q18   1   0.2884  0.5499  0.1887  11.00000  0.05    0.36
Q19   1   0.0000  0.5000  0.0000  10.25000  0.05    0.34
Q20   1   0.0000  0.5000  0.0629  10.50000  0.05    0.34
;
_shelx_res_checksum   96784

_shelx_hkl_file
;
  -2   2   2 85865.0 1009.84   1
  -2  -2  -2 85308.4 1009.82   1
  -2   2  -2 87148.6 1049.29   1
   2  -2  -2 86882.7 1046.80   2
  -1  -2  -3 24123.3 300.604   1
  -2  -3  -1 24183.9 306.834   1
  -3   1   2 23699.4 323.548   1
  -3  -1  -2 23830.6 321.131   1
  -2   3   1 23370.6 306.034   1
   1  -2  -3 23175.0 315.523   2
   2  -3  -1 22920.3 318.674   2
  -3   1  -2 22852.4 318.625   1
  -2   3  -1 22698.3 312.817   1
  -2  -1  -3 14426.9 207.473   1
  -3   2   1 14276.4 210.945   1
  -3  -2  -1 14660.9 211.258   1
   1  -3  -2 13899.3 215.903   2
  -3   2  -1 14261.9 214.260   1
  -2   1  -3 13911.6 216.986   1
   2  -1  -3 14384.0 207.126   2
  -2  -3  -3 152315. 1773.00   1
  -3   3   2 153089. 1789.26   1
  -3  -2  -3 149387. 1791.11   1
  -3  -3  -2 155501. 1787.80   1
   0  -3  -3 46925.2 604.963   2
  -3   3   0 46712.2 589.599   1
  -3   0  -3 47056.4 596.881   1
  -3   3  -2 153479. 1812.55   1
   3   3   2 154986. 1786.73   1
   2  -3  -3 148670. 1772.15   1
  -3   2  -3 154810. 1816.70   1
   2   3   3 151713. 1770.61   1
  -2   3  -3 151728. 1818.68   1
   3  -3  -2 152691. 1787.29   1
   2  -3  -3 154878. 1812.92   2
   0  -4   0 6083.53 113.301   2
  -4   0   0 6171.35 122.821   1
   0   0  -4 6139.93 105.797   2
  -2   4   0 40973.1 511.737   1
  -4   0  -2 40958.5 533.041   1
  -4   0   2 40840.0 534.132   1
   2  -4   0 40314.7 528.401   2
   0  -2  -4 40179.3 529.229   2
  -1  -3  -4 21686.8 276.120   1
  -4  -1  -3 21735.5 311.194   1
  -3   4   1 20837.8 293.844   1
  -1   4   1 7399.10 108.223   1
  -1  -4  -1 7307.32 137.418   2
  -4  -1  -1 7188.34 137.172   1
  -4   1   1 7133.69 136.317   1
   1   1  -4 7371.78 106.004   2
   1  -4   1 7339.00 125.847   2
   1  -1  -4 7458.72 130.021   2
  -1  -1   4 7547.31 109.503   2
   1  -4  -1 7385.97 139.104   2
  -1  -4   1 7697.92 126.010   2
  -4  -1   1 7692.63 143.760   1
  -4   1  -1 7360.70 142.100   1
   3   4   1 20442.0 288.240   1
   1  -3  -4 21479.7 311.446   2
  -4   1  -3 20433.7 311.760   1
   3  -4  -1 20736.9 287.458   1
  -3   4  -1 20965.1 302.649   1
  -2  -4  -2 4407.15 77.8712   1
  -4  -2  -2 4435.16 98.0528   1
  -2  -2  -4 4104.19 87.0881   1
  -2   4   2 4365.84 78.6391   1
  -4   2   2 4501.79 99.4494   1
  -2   0  -4 8492.72 155.036   1
  -2   0   4 8650.78 137.894   2
   2   0  -4 8997.52 139.368   2
   0  -4   2 8885.87 131.182   2
   0   4  -2 8562.40 131.224   2
   0  -4  -2 8465.14 158.679   2
  -4   2   0 8819.68 157.768   1
  -4  -2   0 8607.48 156.030   1
   2   2   4 4250.50 87.8137   1
   2  -4  -2 4314.26 76.0823   1
  -4   2  -2 4144.49 102.438   1
   2  -2  -4 4302.65 98.9647   2
  -2   4  -2 4239.39 101.712   1
   2   4   2 4223.19 75.8900   1
   2  -4  -2 4458.91 104.886   2
  -4  -3  -3 24682.8 348.010   1
  -4   3   3 25029.2 349.935   1
  -3   4   3 24950.7 332.784   1
  -3  -3  -4 24844.0 336.661   1
  -3  -4  -3 25125.5 331.985   1
  -4  -3  -1 6564.01 128.583   1
  -4   3   1 6608.00 129.219   1
  -1  -4  -3 6556.01 141.300   2
  -3  -1  -4 6733.13 129.118   1
  -1  -4   3 6262.91 91.7031   2
  -3   1  -4 5831.00 132.231   1
  -1   4  -3 5964.45 101.488   2
   1  -4  -3 6160.10 132.940   2
  -4   3  -1 6246.65 129.069   1
  -4   3  -3 25196.3 374.485   1
  -3   4  -3 25081.4 373.947   1
  -3   3  -4 24794.4 377.399   1
   3  -4  -3 24782.1 334.165   1
   3   4   3 25641.3 332.025   1
   4  -3  -3 25289.6 350.702   1
   3   3   4 25130.4 339.661   1
   4   3   3 24830.5 347.507   1
   3  -3  -4 25189.1 369.049   2
   3  -3  -4 24601.7 340.545   1
   3  -4  -3 24923.5 372.471   2
  -4  -4  -4 982045. 11298.3   1
  -4   4   4 991726. 11300.7   1
  -4   4   2 27269.3 382.184   1
  -2  -4  -4 28332.7 354.963   1
  -4  -4  -2 28103.6 382.634   1
  -4  -2  -4 28015.3 389.810   1
  -4   0  -4 83839.6 1035.24   1
  -4   4   0 84861.0 1025.15   1
   0  -4  -4 80905.2 1042.61   2
   4  -2  -4 25650.3 371.142   1
   2  -4  -4 26384.2 389.621   2
  -4   4  -2 26712.0 385.441   1
   4   2   4 25900.2 369.462   1
   2   4   4 26886.1 336.620   1
   2  -4  -4 26143.3 337.607   1
   4  -4  -2 25768.0 362.188   1
  -4   2  -4 26697.3 393.306   1
   4   4   2 26224.6 362.642   1
   4  -4  -4 995085. 11225.5   2
   4   4   4 999999. 11178.1   1
  -4   4  -4 972519. 11231.9   1
  -1  -5   0 55441.7 705.265   2
  -1   5   0 56904.8 686.292   1
  -5   0   1 54707.6 719.017   1
  -5   0  -1 55008.8 718.917   1
   1  -5   0 55472.5 704.817   2
   0  -1  -5 56487.4 700.623   2
  -3   5   0 1775.60 57.4555   1
  -5   0  -3 1736.25 67.7023   1
   0  -3  -5 1648.50 65.7359   2
   3  -5   0 1708.35 59.2327   1
  -4   5   1 12715.1 213.108   1
  -5  -1  -4 13388.3 230.370   1
  -1  -4  -5 13482.8 184.447   1
   4  -5   1 12752.3 225.520   1
  -1  -4  -5 13440.8 240.912   2
  -5  -1  -2 47625.3 625.573   1
  -5   1   2 47927.4 627.507   1
  -2   5   1 47194.2 585.396   1
   1   0  -5 40643.0 502.885   2
  -5  -1   0 40974.6 537.428   1
  -5   1   0 39366.8 536.168   1
  -1   0   5 39067.5 503.643   2
   0  -5  -1 40121.6 531.436   2
   0   5  -1 39692.4 513.509   2
   0  -5   1 39695.3 511.802   2
   2  -5  -1 46319.8 581.253   1
   2  -5  -1 47688.6 619.818   2
   1  -2  -5 46974.4 610.020   2
  -5   1  -2 47034.7 622.562   1
  -2   5  -1 47565.4 605.815   1
   1  -4  -5 12209.8 226.653   2
  -5   1  -4 12444.1 227.959   1
   4  -5  -1 12792.8 205.863   1
   4   5   1 12575.1 205.775   1
  -4   5  -1 12161.5 214.824   1
  -2  -3  -5 33476.7 430.233   1
  -5  -2  -3 33296.6 461.543   1
  -5   2   3 33257.4 462.320   1
  -3   5   2 32882.2 430.873   1
  -2  -1  -5 42165.2 550.686   1
  -2   1   5 40558.1 543.412   2
  -1  -5  -2 42527.3 568.621   2
   1  -5   2 42283.4 534.799   2
  -5  -2  -1 41546.1 560.796   1
  -5   2   1 41967.4 561.568   1
   2   1  -5 43207.7 518.226   2
  -2  -1   5 40875.0 506.755   2
   2  -1  -5 41421.7 531.840   2
  -1   5  -2 40909.8 521.687   2
  -5  -2   1 40954.0 555.506   1
   1  -5  -2 40437.1 555.031   2
  -5   2  -1 40401.5 553.506   1
  -1  -5   2 41819.2 515.949   2
   3  -5  -2 34093.5 429.853   1
   3  -5  -2 32997.7 474.253   2
   2  -3  -5 32331.4 463.583   2
  -5   2  -3 33100.2 472.453   1
   3   5   2 32984.1 428.899   1
  -3   5  -2 33133.7 465.508   1
  -3  -4  -5 142266. 1649.41   1
  -4   5   3 141596. 1659.52   1
  -4  -5  -3 140002. 1657.28   1
  -5   3   4 140599. 1684.85   1
  -5  -3  -4 138496. 1680.90   1
  -5  -3  -2 25706.4 372.427   1
  -2  -5  -3 25753.4 324.906   1
  -3  -2  -5 25685.3 361.116   1
  -5   3   2 26353.4 374.334   1
  -2   5   3 25989.1 327.060   1
  -5   3   0 6022.22 134.096   1
  -5  -3   0 5954.90 132.204   1
   0   5  -3 6021.33 102.703   2
   0  -5   3 6066.36 102.652   2
  -3   0   5 6113.46 116.444   2
   0  -5  -3 5923.87 138.154   2
  -3   0  -5 5936.23 132.966   1
  -3   2  -5 25715.2 390.925   1
  -3  -2   5 26268.3 331.366   2
  -2   5  -3 25410.7 350.385   2
   2  -5  -3 25464.9 385.592   2
   3   2   5 25837.4 362.369   1
   2   5   3 25615.3 323.508   1
  -5   3  -2 25661.8 384.087   1
   3  -2  -5 25884.1 371.512   2
   2  -5  -3 25932.7 324.539   1
   5  -3  -2 25268.8 370.509   1
   5   3   2 25455.4 369.110   1
   4  -5  -3 141438. 1719.76   2
   3  -4  -5 142345. 1711.43   2
   4   5   3 140224. 1664.60   1
  -3   4  -5 142292. 1725.98   1
   4  -5  -3 139121. 1666.19   1
   5   3   4 138648. 1686.41   1
  -5   3  -4 139511. 1719.63   1
   3   4   5 138820. 1660.19   1
   5  -3  -4 143109. 1689.83   1
   3  -4  -5 138789. 1659.43   1
  -4   5  -3 139315. 1712.72   1
  -5  -4  -3 106178. 1307.81   1
  -5   4   3 107618. 1308.68   1
  -3  -5  -4 109228. 1273.18   1
  -4  -3  -5 108267. 1301.09   1
  -4  -1  -5 21683.7 328.110   1
  -5   4   1 21792.6 326.632   1
  -4   1   5 21075.8 319.854   2
  -5  -4  -1 21759.4 326.252   1
  -1  -5  -4 22071.9 347.321   2
  -4   1  -5 22852.3 353.352   1
   1  -5  -4 22344.0 354.873   2
   5   4   1 22548.1 337.775   1
  -5   4  -1 22522.7 345.357   1
   5  -4  -1 23928.9 340.294   1
  -1  -5   4 22898.1 284.253   2
  -1   5  -4 22564.8 299.232   2
   4   1   5 22064.6 340.501   1
   4  -3  -5 105389. 1296.99   1
   5   4   3 108455. 1298.55   1
   3   5   4 110056. 1265.51   1
   4   3   5 107624. 1296.32   1
   3  -5  -4 108027. 1334.48   2
  -5   4  -3 107394. 1331.54   1
  -3   5  -4 107271. 1337.32   1
   5  -4  -3 103183. 1298.75   1
   3  -5  -4 106814. 1267.36   1
  -4   3  -5 107565. 1341.43   1
   4  -3  -5 106932. 1323.13   2
  -4  -5  -5 25892.0 357.619   1
  -5   5   4 25983.4 371.963   1
  -5  -4  -5 25476.3 374.705   1
  -5  -5  -4 25128.7 369.259   1
  -5  -5  -2 49125.0 637.088   1
  -5  -2  -5 49133.0 649.405   1
  -2  -5  -5 49549.7 592.600   1
  -5   2   5 46527.6 652.605   2
  -5   5   2 47697.2 637.491   1
   0   5  -5 892.546 24.9177   2
  -5   0  -5 790.283 49.5044   1
   0  -5  -5 904.363 54.9893   2
   5  -5   0 851.576 47.3424   1
  -5   5   0 808.286 47.5985   1
   5   5   0 785.934 45.9549   1
   2  -5  -5 47927.8 658.283   2
   5  -2  -5 48277.1 639.883   1
   5  -5  -2 45769.9 622.409   1
   5   2   5 47658.5 637.949   1
   5   5   2 47611.3 625.642   1
  -5   5  -2 47726.3 649.612   1
   2  -5  -5 48426.1 583.333   1
  -5   2  -5 48031.3 660.403   1
  -5   5  -4 24398.5 395.241   1
  -5   4  -5 25226.7 401.380   1
   4  -5  -5 23547.6 345.043   1
   4  -5  -5 25133.6 398.071   2
   5   4   5 24344.2 358.601   1
   5   5   4 24732.7 354.099   1
   5  -4  -5 24820.4 362.250   1
  -4   5  -5 25155.7 403.188   1
   4   5   5 24231.5 342.051   1
   5  -5  -4 23064.5 351.662   1
   0   0  -6 153846. 1765.52   2
   0  -6   0 150693. 1787.10   2
  -6   0   0 148921. 1806.65   1
  -6   0   2 112496. 1393.49   1
   2  -6   0 111203. 1376.30   2
  -6   0  -2 115822. 1394.12   1
  -2  -6   0 114331. 1375.28   2
   0  -2  -6 111406. 1375.61   2
  -2   6   0 110826. 1350.93   1
  -4   6   0 45305.1 601.515   1
   4   6   0 44295.0 600.570   1
  -6   0  -4 45887.5 626.963   1
   0  -4  -6 44810.8 626.621   2
   4  -6   0 47306.5 608.268   1
  -6  -1  -5 4469.92 123.087   1
  -1  -5  -6 4255.27 80.0264   1
  -5   6   1 4220.57 110.042   1
   5  -6   1 4024.62 115.769   1
  -1  -5  -6 4244.43 128.402   2
  -1  -3  -6 42606.4 591.213   2
  -3   6   1 42940.4 549.345   1
  -6  -1  -3 43510.6 591.216   1
  -6   1   3 42252.6 590.895   1
  -6   1   1 136975. 1663.05   1
  -1   6   1 141226. 1604.76   1
   1   1  -6 138402. 1603.92   2
   1  -6   1 137708. 1635.96   2
  -6  -1  -1 137510. 1661.73   1
  -1  -6  -1 137259. 1656.13   2
  -1   1   6 135750. 1634.62   2
  -6   1  -1 135753. 1646.60   1
   1  -6  -1 133072. 1633.51   2
   1  -1  -6 135722. 1612.65   2
  -6  -1   1 136154. 1647.90   1
  -1  -6   1 137281. 1613.03   2
  -1   6  -1 134026. 1617.08   2
   3  -6  -1 41167.8 541.061   1
   1  -3  -6 41433.3 571.304   2
  -3   6  -1 42212.7 560.000   1
   3   6   1 42152.2 539.209   1
  -3   6  -1 42577.5 566.113   2
   3  -6  -1 41887.6 579.872   2
  -6   1  -3 42047.6 582.497   1
   5   6   1 4537.27 114.618   1
   1  -5  -6 4744.29 134.532   2
   5  -6  -1 4562.05 114.293   1
   6   1   5 4574.31 125.849   1
   6  -1  -5 4558.06 127.109   1
  -6   1  -5 4584.17 131.239   1
  -5   6  -1 4752.65 124.079   1
  -6  -2  -4 14241.1 254.192   1
   4  -6   2 14438.8 257.581   1
  -2  -4  -6 14227.2 214.820   1
  -4   6   2 14619.5 228.379   1
  -2   6   2 14679.6 204.005   1
  -2   2   6 14554.7 241.859   2
  -6   2   2 14594.6 253.015   1
  -6  -2  -2 14307.1 251.172   1
  -2  -2  -6 14577.2 233.708   1
  -2  -6  -2 14523.3 258.010   2
  -6  -2   0 22034.4 340.956   1
  -2   0   6 21706.3 305.638   2
  -6   2   0 21824.2 340.006   1
   0   6  -2 21732.6 307.951   2
   2   0  -6 21779.8 303.871   2
   0  -6   2 21571.4 306.405   2
   0  -6  -2 21960.0 341.053   2
  -6   2  -2 13847.9 250.052   1
   2  -2  -6 14466.9 235.164   2
  -2   6  -2 13929.2 225.356   2
   2  -6  -2 13940.6 198.800   1
  -2  -6   2 14070.9 218.224   2
  -2   6  -2 13613.4 237.992   1
   2  -6  -2 13696.3 246.841   2
   2   6   2 14464.5 197.737   1
  -2  -2   6 13738.1 190.707   2
   2  -4  -6 13622.4 246.519   2
   4  -6  -2 13284.7 213.269   1
   6   2   4 13632.5 239.686   1
   4   6   2 12722.8 213.833   1
  -4   6  -2 13483.1 241.083   1
   6  -2  -4 13213.9 240.989   1
  -6   2  -4 13293.6 252.002   1
  -3  -5  -6 8354.64 146.037   1
  -6  -3  -5 8573.62 178.219   1
  -5   6   3 8486.28 164.436   1
  -5  -6  -3 8581.57 162.750   1
  -3   3   6 14903.9 256.623   2
  -6   3   3 14587.6 253.806   1
  -6  -3  -3 14816.9 252.350   1
  -3  -3  -6 14254.8 230.738   1
  -3   6   3 14543.5 213.804   1
  -3  -1  -6 21906.3 331.151   1
  -3   1   6 21298.7 319.717   2
  -1  -6  -3 22177.6 351.110   2
  -6  -3  -1 21669.3 338.289   1
  -6   3   1 21396.7 337.246   1
  -6   3  -1 21819.9 344.867   1
  -3  -1   6 22277.2 300.144   2
   3  -1  -6 21955.6 321.530   2
  -1  -6   3 21766.4 296.928   2
  -3   1  -6 21683.8 345.720   1
  -1   6  -3 21303.9 304.897   2
   1  -6  -3 21729.9 347.577   2
   3  -6  -3 14595.6 212.402   1
   3   6   3 15025.0 212.754   1
  -3   6  -3 13644.2 233.953   2
   6   3   3 14265.7 249.164   1
   3  -6  -3 15012.7 267.902   2
  -6   3  -3 15041.1 268.029   1
  -3   6  -3 14860.2 263.170   1
  -3  -3   6 14312.8 195.577   2
   3  -3  -6 14827.0 256.410   2
   6  -3  -3 14802.7 252.717   1
  -3   3  -6 15013.2 275.229   1
   6   3   5 8930.04 179.808   1
   3   5   6 8900.72 152.496   1
  -6   3  -5 8505.54 197.317   1
   3  -5  -6 8615.90 152.590   1
   3  -5  -6 8705.98 193.981   2
   6  -3  -5 8457.93 180.301   1
   5   6   3 8713.60 166.542   1
  -3   5  -6 8748.26 205.460   1
   5  -6  -3 8095.90 161.182   1
  -5   6  -3 8640.06 190.835   1
  -4  -6  -4 1646.55 55.6581   1
  -4   6   4 1673.06 56.3184   1
  -6  -4  -4 1779.61 70.6769   1
  -6   4   4 1690.18 71.4417   1
  -4  -4  -6 1754.30 62.6603   1
  -4  -2  -6 10185.7 188.564   1
  -4   2   6 9639.25 191.020   2
  -6  -4  -2 9931.99 192.599   1
  -2  -6  -4 9766.68 139.583   1
  -6   4   2 9838.48 193.244   1
  -2  -6  -4 10387.7 215.423   2
  -4   0   6 6533.25 132.103   2
  -6   4   0 6677.61 151.370   1
  -4   0  -6 6568.64 151.453   1
   0  -6  -4 6536.89 159.831   2
   0   6  -4 6609.52 113.319   2
  -6  -4   0 6702.65 153.479   1
   6   4   2 9797.52 192.859   1
   2   6   4 10041.1 139.600   1
   2  -6  -4 9511.90 139.845   1
   4   2   6 9989.37 190.309   1
   2  -6  -4 9628.73 206.545   2
  -2  -6   4 10496.0 152.392   2
  -2   6  -4 9733.71 166.515   2
   6  -4  -2 10341.7 194.587   1
  -4   2  -6 9524.77 207.084   1
   4  -2  -6 9756.30 191.982   2
  -6   4  -2 9901.26 202.289   1
  -4  -2   6 10010.7 161.821   2
   4   6   4 1499.08 51.0529   1
  -6   4  -4 1325.50 71.0590   1
   6  -4  -4 1387.17 62.6156   1
   4  -6  -4 1419.36 51.0722   1
   6   4   4 1546.70 65.1414   1
   4   4   6 1489.83 57.6062   1
  -4   6  -4 1399.47 72.2498   1
   4  -4  -6 1377.99 69.2698   2
   4  -6  -4 1340.85 71.9728   2
   4  -4  -6 1482.44 58.0000   1
  -4   4  -6 1528.18 78.5788   1
  -6  -5  -5 2367.79 83.8921   1
  -6   5   5 2530.82 87.3665   1
  -5  -5  -6 2370.87 79.7764   1
  -5   6   5 2454.24 78.4439   1
  -5  -6  -5 2397.67 75.4747   1
  -5   3   6 3228.96 105.343   2
  -6   5   3 3445.40 101.779   1
  -5  -3  -6 3983.34 106.333   1
  -3  -6  -5 3429.52 74.4361   1
  -6  -5  -3 3098.52 97.5830   1
  -6   5   1 52256.0 687.155   1
   6  -5   1 50261.5 691.611   1
  -5  -1  -6 50760.7 689.070   1
   6   5  -1 50799.2 692.033   1
  -1  -6  -5 51385.6 713.885   2
  -5   1   6 50615.1 677.221   2
  -6  -5  -1 51593.0 684.412   1
  -1   6  -5 50032.0 624.521   2
   6  -5  -1 50566.8 679.874   1
   1  -6  -5 51263.6 707.425   2
  -6   5  -1 50971.1 691.457   1
   6   5   1 51073.4 684.306   1
  -5   1  -6 51274.2 701.530   1
   5   1   6 51623.3 691.639   1
   5   3   6 3041.02 92.6400   1
   3  -6  -5 2787.71 104.087   2
  -5   3  -6 2918.92 108.059   1
   6   5   3 2811.80 88.8477   1
  -6   5  -3 2739.75 101.461   1
   6  -5  -3 2947.72 91.0662   1
   3  -6  -5 2839.36 68.1043   1
   3   6   5 2902.67 67.1174   1
  -3   6  -5 2925.10 107.819   1
   5  -3  -6 3079.32 93.7312   1
   5   6   5 2460.78 75.0562   1
   6  -5  -5 2283.59 81.4702   1
   5  -5  -6 2397.71 78.7445   1
  -5   6  -5 2266.03 101.049   1
  -6   5  -5 2340.30 100.496   1
   6   5   5 2534.17 83.7257   1
  -5   5  -6 2227.17 103.148   1
   5  -5  -6 2346.42 99.7151   2
   5   5   6 2509.03 79.1787   1
   5  -6  -5 2057.19 72.0254   1
  -6  -6  -6 4301.67 115.532   1
  -6   4   6 1727.11 80.4297   2
  -6  -6  -4 1718.27 69.0368   1
  -4  -6  -6 1796.82 59.3288   1
  -6  -4  -6 1742.23 73.9961   1
  -6   6   4 1702.66 70.1155   1
  -6   2   6 190882. 2287.31   2
  -6  -6  -2 188683. 2268.26   1
  -2  -6  -6 189707. 2202.34   1
   6  -6   2 190654. 2299.59   1
  -2  -6  -6 186810. 2319.02   2
  -6   6   2 191251. 2271.47   1
  -6  -2  -6 189628. 2285.75   1
   6   6   0 8160.90 174.091   1
   0   6  -6 7816.03 114.253   2
  -6   6   0 7861.10 172.195   1
   6  -6   0 7763.73 171.560   1
   0  -6  -6 7768.98 189.143   2
  -6   0  -6 7949.15 183.018   1
   6   2   6 192894. 2282.92   1
   6   6   2 188151. 2264.72   1
   6  -6  -2 190986. 2264.57   1
   6  -2  -6 188893. 2281.19   1
   2  -6  -6 192122. 2200.77   1
  -6   6  -2 186982. 2291.72   1
  -6   2  -6 192185. 2307.92   1
   2  -6  -6 187202. 2306.05   2
   6  -4  -6 1920.79 77.4666   1
   4  -6  -6 1952.90 63.4353   1
   6   4   6 1946.85 75.9816   1
   6  -6  -4 2135.45 76.9593   1
  -6   4  -6 1804.02 89.6828   1
  -6   6  -4 2060.74 92.0061   1
   4  -6  -6 1940.24 90.3805   2
   6   6   4 1992.93 72.3257   1
   4   6   6 2058.12 63.2551   1
  -4   6  -6 1941.58 93.2888   1
   6  -6  -6 4191.26 114.057   1
   6   6   6 4246.88 112.920   1
  -6   6  -6 4082.73 144.194   1
   1  -7   0 57263.5 755.604   2
  -1  -7   0 56990.2 754.926   2
  -7   0  -1 57475.0 775.792   1
  -7   0   1 57615.5 777.293   1
   0  -1  -7 57850.7 743.276   2
  -1   7   0 58630.6 758.308   2
   0   1  -7 59051.7 719.244   2
   0  -3  -7 15397.9 269.260   2
   3  -7   0 15326.1 270.174   2
  -7   0   3 15064.3 279.819   1
  -3   7   0 15469.3 246.267   1
  -7   0  -3 15449.8 279.222   1
  -3   7   0 15423.3 267.656   2
  -7   0  -5 59926.6 814.132   1
   0  -5  -7 60322.1 818.305   2
   5  -7   0 60171.4 788.556   1
   5   7   0 58790.6 782.887   1
  -5   7   0 60734.7 785.881   1
   6   7  -1 18502.0 321.917   1
  -6   7   1 18683.2 313.453   1
  -1  -6  -7 19372.9 255.557   1
   6  -7   1 18846.1 325.683   1
  -1  -6  -7 19349.0 347.791   2
  -7  -1  -6 18795.8 332.568   1
  -1  -4  -7 59274.1 735.141   1
  -1  -4  -7 58700.4 793.974   2
  -7  -1  -4 57765.5 791.020   1
   4  -7   1 58574.5 775.319   1
  -4   7   1 58848.1 750.671   1
  -1  -2  -7 31331.6 443.169   2
  -2   7   1 30372.0 400.346   1
  -1   2   7 29285.7 433.946   2
  -2  -7  -1 29877.4 445.541   2
  -7  -1  -2 30492.0 452.768   1
   2  -7   1 30311.9 434.190   2
  -7   1   2 29913.6 454.723   1
   1   2  -7 29917.2 380.734   2
  -7  -1   0 43183.2 609.989   1
   1   0  -7 43263.8 562.026   2
  -7   1   0 43492.0 610.294   1
   0  -7   1 43103.7 580.653   2
   0  -7  -1 43124.0 598.362   2
   0   7  -1 45528.0 586.954   2
  -7  -1   2 30199.7 465.260   1
  -2  -7   1 30332.2 436.370   2
  -2   7  -1 31610.2 442.464   2
  -7   1  -2 31807.1 467.414   1
  -2   7  -1 30351.4 434.805   1
   1  -2  -7 31112.9 442.912   2
   2  -7  -1 30427.3 453.643   2
   4  -7  -1 60473.6 773.060   1
  -4   7  -1 62367.4 802.688   2
  -4   7  -1 60317.4 790.903   1
  -7   1  -4 60954.2 819.356   1
   1  -4  -7 60358.7 811.001   2
   4   7   1 59497.6 769.899   1
   6  -7  -1 18665.4 307.417   1
  -1   6  -7 18584.0 246.630   2
  -6   7  -1 18635.4 326.523   2
   6   7   1 18143.6 307.310   1
  -7   1  -6 18685.0 335.860   1
  -6   7  -1 18549.0 319.146   1
   7   1   6 18632.9 327.219   1
   1  -6  -7 18277.3 336.772   2
   7  -1  -6 18434.6 328.082   1
  -5   7   2 3580.00 98.9683   1
  -7  -2  -5 3621.49 115.673   1
  -2  -5  -7 3411.22 120.660   2
   5  -7   2 3691.13 115.431   1
  -2  -5  -7 3494.02 81.2673   1
  -3   7   2 22198.5 305.524   1
  -7  -2  -3 21894.0 355.956   1
  -2   3   7 21301.6 346.961   2
  -2  -3  -7 21700.9 321.606   1
  -7   2   3 21866.0 355.692   1
  -2   1   7 192.541 23.7416   2
  -1   7   2 236.384 16.4701   1
   1  -7   2 253.548 26.8930   2
  -1  -7  -2 250.921 32.2095   2
  -2  -1  -7 221.430 28.8058   1
  -7  -2  -1 233.679 35.8153   1
   2   1  -7 232.392 20.0585   2
  -7   2   1 231.295 34.4782   1
  -7  -2   1 223.041 34.8121   1
  -1  -7   2 244.311 24.1637   2
  -7   2  -1 229.678 33.2762   1
   2  -1  -7 260.511 26.8428   2
   1  -7  -2 268.199 33.4728   2
  -2  -1   7 282.296 22.4087   2
  -1   7  -2 317.368 27.4576   2
  -3   7  -2 22494.0 351.418   1
   3  -7  -2 22152.0 311.396   1
   3  -7  -2 21919.9 362.964   2
   2  -3  -7 22364.1 352.228   2
  -3   7  -2 22247.5 340.292   2
  -7   2  -3 21350.5 364.326   1
   3   7   2 22758.4 310.429   1
   7   2   5 3711.54 114.458   1
   5   7   2 3475.15 98.4296   1
  -5   7  -2 3643.22 112.251   2
   7  -2  -5 3727.32 115.732   1
   5  -7  -2 3669.20 99.3431   1
   2  -5  -7 3711.28 121.127   2
  -7   2  -5 3747.24 124.020   1
  -5   7  -2 3522.21 112.270   1
  -6   7   3 14567.6 253.755   1
  -7   3   6 15016.6 282.714   2
  -6  -7  -3 14203.7 252.117   1
  -3  -6  -7 14603.6 222.985   1
  -7  -3  -6 14835.4 274.681   1
   6  -7   3 14585.4 287.322   1
  -7  -3  -4 24870.1 387.959   1
  -3  -4  -7 24727.8 351.420   1
  -7   3   4 24546.1 389.622   1
  -3   4   7 24157.7 391.519   2
  -4   7   3 24399.5 344.302   1
  -2   7   3 14805.9 200.529   1
  -7   3   2 14796.5 264.683   1
  -3   2   7 14397.0 251.222   2
  -7  -3  -2 14452.2 262.255   1
  -2  -7  -3 14598.1 274.504   2
  -3  -2  -7 13714.6 244.938   1
  -3   0   7 6737.56 133.764   2
   0  -7  -3 6770.12 164.083   2
   0   7  -3 6700.38 131.048   2
  -7   3   0 6566.14 160.845   1
   3   0  -7 6688.26 132.701   2
   0  -7   3 6791.26 128.289   2
  -7  -3   0 6569.69 160.534   1
  -3   0  -7 6487.56 157.564   1
   7  -3  -2 13770.2 253.173   1
  -2   7  -3 13532.8 225.941   2
   2  -7  -3 14258.6 263.626   2
  -2  -7   3 14269.8 217.925   2
   3  -2  -7 13840.2 242.776   2
  -7   3  -2 14120.9 263.618   1
   2  -7  -3 13936.0 193.782   1
   7   3   2 13643.3 253.495   1
   2   7   3 14131.1 191.654   1
  -3   2  -7 14437.1 268.350   1
  -3  -2   7 13247.0 201.242   2
   4   7   3 25897.8 357.535   1
   3  -4  -7 25450.3 405.734   2
  -3   4  -7 25439.5 427.784   1
   4  -7  -3 25188.0 357.580   1
  -4   7  -3 25690.4 409.810   1
   7   3   4 26538.6 400.319   1
  -7   3  -4 25667.0 419.376   1
   7  -3  -4 25745.2 401.602   1
  -4   7  -3 25941.9 388.377   2
   4  -7  -3 25952.9 421.241   2
  -6   7  -3 13692.8 272.241   1
   6   7   3 13866.6 243.096   1
   3  -6  -7 13725.7 214.210   1
   6  -7  -3 13410.6 240.255   1
   3  -6  -7 13524.0 275.147   2
   7  -3  -6 14107.1 263.251   1
  -7   3  -6 13589.7 280.822   1
   7   3   6 14201.0 261.689   1
  -5  -7  -4 7658.37 150.729   1
  -4  -5  -7 7924.15 151.909   1
  -7  -4  -5 8007.21 177.864   1
  -7   4   5 7849.10 179.253   1
  -5   7   4 7295.15 151.371   1
  -4  -3  -7 20691.4 326.556   1
  -7   4   3 20804.5 345.748   1
  -3   7   4 21619.8 288.043   1
  -7  -4  -3 20846.1 344.820   1
  -4   3   7 21101.3 345.092   2
  -1  -7  -4 8351.95 195.582   2
  -7  -4  -1 8539.33 186.353   1
  -4   1   7 8600.72 171.076   2
  -7   4   1 8856.09 189.081   1
  -4  -1  -7 8061.28 178.686   1
  -4  -1   7 8142.85 152.862   2
  -1  -7   4 8632.88 142.265   2
   7  -4  -1 8574.10 182.856   1
  -4   1  -7 8641.17 192.990   1
   7   4   1 8545.49 184.945   1
   1  -7  -4 8642.09 196.110   2
  -1   7  -4 8317.68 150.441   2
  -7   4  -1 8491.84 189.583   1
   3  -7  -4 22287.5 292.168   1
   7  -4  -3 21554.1 350.790   1
  -3   7  -4 21612.3 325.169   2
   7   4   3 21592.2 350.112   1
   4   3   7 20962.0 336.093   1
   3   7   4 21912.2 290.155   1
  -3   7  -4 20883.9 363.482   1
  -7   4  -3 21238.0 365.503   1
  -4  -3   7 21648.8 291.921   2
  -3  -7   4 21933.9 305.656   2
   4  -3  -7 21873.2 352.235   2
   3  -7  -4 21568.5 368.367   2
  -4   3  -7 21049.9 373.080   1
   7   4   5 7826.73 175.907   1
   4   5   7 8157.36 157.991   1
   7  -4  -5 7949.65 178.685   1
  -4   5  -7 8048.68 204.732   1
   5   7   4 7901.67 154.253   1
   4  -5  -7 7349.31 152.515   1
   5  -7  -4 7908.86 153.308   1
   5  -7  -4 8252.71 200.215   2
  -7   4  -5 8070.42 198.383   1
   4  -5  -7 7711.85 189.908   2
  -5   7  -4 8022.47 194.968   1
  -6  -7  -5 27956.3 411.442   1
  -6   7   5 28629.0 415.991   1
  -5  -6  -7 28410.5 408.030   1
  -7  -5  -6 27466.7 432.524   1
  -5   4   7 399.195 40.9501   2
  -7   5   4 387.001 39.0978   1
  -4  -7  -5 411.997 27.6971   1
  -7  -5  -4 397.448 41.3730   1
  -5  -4  -7 534.609 39.9118   1
  -2  -7  -5 33306.5 520.499   2
  -7   5   2 34312.6 494.865   1
  -7  -5  -2 32750.3 491.036   1
  -5   2   7 33210.5 488.530   2
  -5  -2  -7 33834.8 487.526   1
  -5   0  -7 68.5339 27.0173   1
  -7   5   0 15.6506 21.9284   1
   0   7  -5 23.9642 10.0750   2
  -5   0   7 71.3346 17.6799   2
   7   5   0 8.20551 18.1179   1
   5   0   7 9.68533 17.1391   1
   7  -5   0 20.0320 19.5555   1
   0  -7  -5 24.7469 24.5855   2
  -2   7  -5 32295.5 440.988   2
   2  -7  -5 32906.3 507.582   2
  -5   2  -7 32758.0 507.219   1
  -2  -7   5 33311.5 417.024   2
   7   5   2 33399.2 486.068   1
   2  -7  -5 32397.6 402.025   1
  -5  -2   7 32960.2 445.602   2
   2   7   5 33100.0 400.538   1
   5   2   7 33137.2 486.988   1
   7  -5  -2 33100.0 483.193   1
  -7   5  -2 33368.0 503.602   1
   5  -4  -7 390.702 35.8276   1
   5  -4  -7 459.522 44.1304   2
   4  -7  -5 297.428 24.3888   1
   5   4   7 329.956 32.4470   1
  -7   5  -4 300.062 39.4623   1
  -4   7  -5 364.653 44.3228   1
   7   5   4 444.806 38.9773   1
   4   7   5 386.951 26.4445   1
  -5   4  -7 346.612 46.1267   1
   4  -7  -5 467.378 48.0628   2
   7  -5  -4 457.843 40.0814   1
   5   6   7 28624.4 410.200   1
   7   5   6 27831.6 432.087   1
   6  -7  -5 29349.3 417.837   1
   7  -5  -6 28628.0 436.821   1
   5  -6  -7 28671.5 472.226   2
   5  -6  -7 28382.6 411.571   1
  -6   7  -5 28918.7 476.172   1
   6   7   5 27745.1 411.513   1
  -5   6  -7 28505.0 483.392   1
  -7   5  -6 28549.6 478.532   1
  -6  -5  -7 20109.4 328.814   1
  -7   6   5 20178.1 335.976   1
  -7  -6  -5 20137.6 332.650   1
  -5  -7  -6 20383.2 305.670   1
  -6   3   7 14111.1 271.131   2
  -6  -3  -7 15019.6 265.337   1
  -3  -7  -6 14503.1 208.625   1
  -7   6   3 14513.6 263.808   1
  -7  -6  -3 14142.1 261.378   1
  -7   6   1 18837.8 323.252   1
   7  -6   1 18888.8 329.163   1
   7   6  -1 19286.3 330.946   1
  -1  -7  -6 18937.4 348.822   2
  -6   1   7 18598.6 312.162   2
  -6  -1  -7 18530.0 325.414   1
   1  -7  -6 19414.7 350.857   2
  -6  -1   7 19065.6 303.697   2
  -1   7  -6 18954.1 265.136   2
   7   6   1 19860.2 327.236   1
   7  -6  -1 19545.2 324.709   1
  -6   1  -7 18709.7 338.671   1
  -7   6  -1 18944.7 332.869   1
   6   1   7 19458.5 336.978   1
  -6   3  -7 13935.8 285.237   1
   6  -3  -7 14162.0 261.169   1
   3  -7  -6 14260.8 205.259   1
   3  -7  -6 14048.7 283.248   2
   6   3   7 14386.7 262.536   1
   7   6   3 13882.6 256.361   1
  -7   6  -3 13940.3 278.756   1
  -3  -7   6 13846.8 192.104   2
   7  -6  -3 13809.8 253.432   1
   3   7   6 13866.6 204.185   1
  -5   7  -6 19815.1 374.908   1
  -6   5  -7 19936.2 376.456   1
   6   5   7 19347.0 324.550   1
   7  -6  -5 21025.5 334.838   1
   7   6   5 20169.5 327.833   1
  -7   6  -5 20067.1 371.036   1
   6  -5  -7 20429.2 329.276   1
   5   7   6 19859.3 301.476   1
   5  -7  -6 19354.1 301.723   1
   5  -7  -6 20137.0 371.947   2
  -7  -7  -6 4312.72 121.104   1
  -7  -6  -7 4005.67 122.040   1
  -6  -7  -7 3944.90 110.332   1
  -7   4   7 127081. 1585.58   2
  -4  -7  -7 124853. 1493.87   1
  -7  -7  -4 125953. 1541.49   1
  -7   7   4 123003. 1542.26   1
   7  -7   4 125735. 1602.42   1
  -7  -4  -7 124092. 1554.62   1
  -2  -7  -7 34798.2 443.413   1
  -7   7   2 35600.1 522.555   1
  -2  -7  -7 35636.6 562.781   2
   7  -7   2 36524.9 545.655   1
   7   7  -2 36378.1 544.904   1
  -7   2   7 36614.4 534.058   2
  -7  -2  -7 35389.7 533.916   1
  -7   0  -7 149.631 34.6697   1
   7   0  -7 36.0621 28.1845   1
   0   7  -7 71.8957 8.71285   2
   7  -7   0 69.4480 23.1810   1
  -7   0   7 116.424 24.6788   2
  -7   7   0 100.275 30.4039   1
   7   0   7 88.2854 27.6962   1
   0  -7  -7 81.1314 26.8139   2
   7   7   0 27.3373 22.2169   1
  -7   2  -7 34927.5 548.240   1
   7  -7  -2 35144.9 512.340   1
   2  -7  -7 34879.4 548.262   2
  -2   7  -7 35184.0 457.322   2
   7   7   2 35475.0 513.159   1
   2  -7  -7 34909.2 439.507   1
  -7   7  -2 35254.1 534.899   1
   7   2   7 35030.1 531.271   1
   7  -2  -7 34951.5 530.931   1
   4  -7  -7 126789. 1496.94   1
   7  -4  -7 122694. 1558.09   1
   7  -7  -4 126750. 1541.16   1
   4   7   7 124491. 1496.91   1
   7   7   4 127501. 1541.27   1
  -7   4  -7 124192. 1604.81   1
   4  -7  -7 124018. 1601.21   2
  -7   7  -4 126633. 1596.68   1
  -4   7  -7 123746. 1612.38   1
   7   4   7 122364. 1558.62   1
   7  -7  -6 3900.96 116.335   1
   6  -7  -7 3953.76 145.120   2
   7  -6  -7 4005.83 119.987   1
   6   7   7 3833.73 107.291   1
  -6   7  -7 3944.49 147.363   1
   7   7   6 3976.27 115.329   1
   7   6   7 3920.06 117.162   1
  -7   7  -6 3849.82 145.343   1
  -7   6  -7 3914.07 146.974   1
   6  -7  -7 3711.34 107.322   1
   0   0  -8 123616. 1502.09   2
  -8   0   0 124249. 1558.94   1
   0   8   0 126619. 1535.02   2
   0  -8   0 124420. 1531.71   2
  -2   8   0 36.7275 15.5315   1
   2  -8   0 55.4907 21.8960   2
  -8   0   2 152.184 32.1126   1
  -2  -8   0 53.9154 22.5145   2
   0  -2  -8 62.0495 22.6664   2
  -2   8   0 84.4626 23.4738   2
   0   2  -8 64.4350 13.9547   2
  -8   0  -2 45.5191 29.9463   1
  -4   8   0 37136.8 544.629   2
  -4   8   0 37277.3 517.233   1
   0   4  -8 37137.9 451.010   2
  -8   0  -4 37335.9 556.940   1
   0  -4  -8 37445.8 550.315   2
   0  -6  -8 33271.2 532.839   2
  -8   0  -6 34295.8 528.397   1
  -6   8   0 33926.6 523.672   2
   6  -8   0 34375.9 504.742   1
  -6   8   0 33839.1 501.128   1
   6   8   0 33888.0 499.780   1
  -1  -7  -8 84188.1 1134.48   2
   7   8  -1 84774.6 1100.23   1
  -1  -7  -8 84640.4 995.599   1
  -8   1   7 81511.8 1092.55   2
  -7   8   1 82088.8 1087.09   1
  -8  -1  -7 83915.3 1111.95   1
   7  -8   1 87192.1 1106.99   1
  -1  -5  -8 57941.6 801.135   2
  -5   8   1 57138.9 750.065   1
  -1  -5  -8 56956.8 721.394   1
   5  -8   1 57898.6 776.059   1
  -1   5   8 57072.7 800.622   2
  -8  -1  -5 57173.4 797.433   1
  -8   1   3 42833.7 620.748   1
   1   3  -8 42659.8 517.615   2
  -3   8   1 42329.8 559.975   1
  -3  -8  -1 42815.9 610.823   2
  -1  -3  -8 43512.9 607.818   2
  -8  -1  -3 42860.5 619.787   1
  -1  -8  -1 16700.4 290.562   2
  -1   8   1 16329.4 246.109   1
  -8   1   1 16792.0 302.608   1
   1  -8   1 16908.9 278.166   2
   1   1  -8 16741.8 246.830   2
  -8  -1  -1 16583.6 303.429   1
  -1   8   1 16757.4 293.357   2
   1  -8  -1 16990.0 293.248   2
  -1   8  -1 16519.6 280.522   2
  -8  -1   1 16529.4 305.357   1
   1  -1  -8 16930.0 270.056   2
  -1  -8   1 16638.0 276.776   2
  -8   1  -1 16672.4 303.718   1
   3  -8  -1 41990.8 615.537   2
  -3   8  -1 43231.2 589.879   1
  -3   8  -1 43239.3 602.457   2
  -8   1  -3 43570.6 628.497   1
  -3  -8   1 43135.7 595.502   2
   1  -3  -8 43993.9 605.855   2
   8   1   5 58489.0 806.257   1
  -5   8  -1 59466.9 784.013   1
   8  -1  -5 58560.3 809.377   1
   5  -8  -1 58934.0 769.568   1
   5   8   1 57856.6 766.772   1
  -8   1  -5 56911.7 811.184   1
  -5   8  -1 58963.6 798.414   2
   1  -5  -8 59183.4 810.070   2
   7   8   1 83281.4 1076.57   1
  -7   8  -1 82894.9 1093.31   1
   8   1   7 83175.2 1109.42   1
  -8   1  -7 83456.8 1115.11   1
   7  -8  -1 82609.7 1078.69   1
   8  -1  -7 85301.1 1109.66   1
  -1   7  -8 83311.1 985.622   2
   1  -7  -8 82022.4 1119.15   2
  -7   8  -1 83686.3 1106.65   2
  -8  -2  -6 3917.65 127.996   1
   6  -8   2 3791.72 126.561   1
  -6   8   2 3777.73 111.782   1
  -2  -6  -8 3885.06 87.1764   1
  -2  -6  -8 3876.59 137.550   2
  -2  -4  -8 29167.1 413.694   1
  -4   8   2 29714.0 409.681   1
  -2   4   8 29647.4 459.339   2
  -8  -2  -4 29634.3 462.902   1
  -8   2   4 28754.4 462.390   1
  -2  -8  -2 3253.43 111.935   2
   2  -8   2 3389.90 99.6382   2
   2   2  -8 3190.74 71.5403   2
  -8  -2  -2 3414.10 116.121   1
  -2   8   2 3337.67 75.3286   1
  -2  -2  -8 3253.89 99.0424   1
  -2   2   8 3227.55 101.725   2
  -8   2   2 3306.70 112.653   1
  -2   0   8 8753.82 166.325   2
  -8   2   0 9118.78 203.231   1
  -8  -2   0 8964.56 202.802   1
   2   0  -8 9202.88 166.141   2
   0   8  -2 8942.09 174.940   2
   0  -8  -2 8926.66 196.551   2
   0  -8   2 8990.28 172.263   2
  -8   2  -2 3116.78 112.837   1
  -2   8  -2 3180.37 101.008   1
  -2   8  -2 3190.78 96.0578   2
   2  -8  -2 3125.89 109.526   2
  -2  -8   2 3196.41 92.6361   2
  -8  -2   2 3211.62 115.622   1
   2  -2  -8 3182.19 98.1000   2
   2  -4  -8 30878.9 480.112   2
  -4   8  -2 31985.8 473.693   1
  -4   8  -2 31502.3 468.534   2
   4   8   2 31934.6 434.354   1
   4  -8  -2 31247.9 438.710   1
   8   2   4 32010.6 483.642   1
   8  -2  -4 31961.4 486.679   1
   4  -8  -2 31965.5 496.343   2
  -8   2  -4 31318.9 495.562   1
   6  -8  -2 3383.20 103.344   1
  -6   8  -2 3251.42 114.771   1
   6   8   2 3282.00 101.655   1
   8   2   6 3315.97 115.985   1
   8  -2  -6 3358.43 118.395   1
   2  -6  -8 3334.18 122.969   2
  -6   8  -2 3407.07 116.675   2
  -8   2  -6 3356.79 126.074   1
  -3  -7  -8 97697.2 1152.58   1
   7  -8   3 95356.3 1259.03   1
  -8  -3  -7 93393.3 1235.22   1
  -3  -7  -8 93914.6 1277.22   2
  -7   8   3 95033.5 1210.90   1
  -3  -5  -8 5051.54 114.026   1
  -5   8   3 4936.18 118.349   1
  -8  -3  -5 5113.99 146.291   1
  -3   5   8 4932.64 148.396   2
  -3   8   3 57903.4 701.496   1
  -8  -3  -3 56246.1 776.631   1
  -8   3   3 56175.3 777.799   1
  -3  -8  -3 55747.3 789.248   2
  -3   3   8 56133.4 765.757   2
  -3  -3  -8 55948.5 740.808   1
  -3   1   8 21388.8 337.714   2
   1  -8   3 22400.8 330.196   2
  -1  -8  -3 22199.8 372.565   2
  -1   8   3 22085.2 278.095   1
  -3  -1  -8 21830.2 355.747   1
  -8  -3  -1 22113.4 369.562   1
  -8   3   1 22245.4 370.349   1
  -1   8  -3 22902.0 329.966   2
  -8   3  -1 21949.7 370.690   1
  -3  -1   8 21701.3 310.858   2
   1   8   3 21862.0 273.214   1
  -3   1  -8 20988.3 365.276   1
  -8  -3   1 21443.7 369.196   1
   1  -8  -3 21287.9 366.240   2
   3  -1  -8 21181.3 332.847   2
  -1  -8   3 20985.8 317.264   2
  -3  -3   8 52725.2 647.822   2
   8  -3  -3 53689.1 737.341   1
   8   3   3 53534.7 735.852   1
   3  -8  -3 54032.0 665.628   1
  -8   3  -3 53418.3 750.144   1
   3   8   3 54387.0 662.354   1
  -3   8  -3 51606.2 704.815   2
   3  -3  -8 53367.8 725.241   2
   3  -8  -3 53420.4 747.941   2
  -3   8  -3 52734.1 735.241   1
  -3  -8   3 54021.3 692.534   2
   5   8   3 6472.54 136.660   1
  -5   8  -3 6163.52 165.632   1
   8   3   5 6363.33 163.389   1
   5  -8  -3 6312.51 137.280   1
   8  -3  -5 6384.11 166.164   1
  -5   8  -3 6423.72 157.500   2
   3  -5  -8 6277.58 168.215   2
  -8   3  -5 6049.94 173.420   1
   7  -8  -3 93590.2 1187.68   1
   8  -3  -7 93748.3 1221.76   1
   3  -7  -8 93769.9 1246.46   2
   3  -7  -8 95464.1 1135.21   1
   8   3   7 92680.2 1220.64   1
   7   8   3 93308.2 1191.46   1
  -8   3  -7 92949.5 1251.98   1
  -7   8  -3 94886.0 1233.11   1
  -6   8   4 4177.28 114.044   1
  -4  -6  -8 4181.85 103.136   1
  -8  -4  -6 4191.75 132.147   1
  -4   8   4 11003.7 180.166   1
  -8   4   4 10056.3 224.594   1
  -8  -4  -4 10991.6 227.308   1
  -4  -4  -8 10740.5 201.708   1
  -4   4   8 10536.2 227.713   2
  -4   2   8 60797.9 821.307   2
  -4  -2  -8 62888.3 823.110   1
  -8   4   2 62307.6 844.608   1
  -2   8   4 62414.8 739.480   1
  -8  -4  -2 62052.9 840.763   1
  -2  -8  -4 62818.9 861.186   2
  -8  -4   0 4693.97 140.371   1
  -4   0  -8 4655.28 137.218   1
  -4   0   8 4698.24 114.166   2
   0  -8  -4 4829.77 145.238   2
   0   8  -4 4621.35 105.989   2
  -8   4   0 4728.56 140.981   1
   0  -8   4 4770.60 105.658   2
  -8   4  -2 60789.7 836.222   1
  -4   2  -8 58858.3 838.659   1
   2   8   4 59220.5 718.508   1
   4  -2  -8 61683.4 805.657   2
  -2   8  -4 61037.6 777.697   2
   2  -8  -4 60177.1 838.635   2
   8  -4  -2 62428.2 823.367   1
  -2  -8   4 62243.9 759.949   2
  -4  -2   8 62271.6 756.811   2
   8   4   2 62052.6 825.204   1
   8   4   4 10016.0 212.279   1
  -4  -4   8 9897.08 147.017   2
  -4   4  -8 9353.13 231.159   1
   4  -8  -4 9619.79 167.367   1
  -4   8  -4 9867.17 222.067   1
   4   8   4 9993.28 167.103   1
   4  -8  -4 9850.10 228.548   2
   8  -4  -4 10426.7 216.664   1
   4  -4  -8 9667.93 215.442   2
  -8   4  -4 10040.5 228.488   1
  -4   8  -4 9679.03 195.576   2
  -8   4  -6 5000.74 161.448   1
   8   4   6 5075.40 143.909   1
   8  -4  -6 5024.68 146.498   1
   4  -6  -8 5296.69 120.025   1
   6   8   4 4898.94 123.540   1
   4  -6  -8 4935.00 155.611   2
  -6   8  -4 5157.63 157.562   1
  -4   6  -8 5195.81 168.982   1
   6  -8  -4 5056.81 124.616   1
  -8  -5  -7 9995.46 224.244   1
  -7  -8  -5 10047.0 204.914   1
  -5  -7  -8 10642.3 193.670   1
  -7   8   5 10189.0 208.989   1
  -5   7   8 10599.7 251.240   2
  -8   5   5 31223.3 479.734   1
  -8  -5  -5 30295.4 475.054   1
  -5  -8  -5 31161.3 426.528   1
  -5  -5  -8 30886.5 448.240   1
  -5   8   5 30645.5 428.336   1
  -8  -5  -3 6977.80 173.646   1
  -5  -3  -8 7275.41 165.365   1
  -3  -8  -5 7193.08 193.723   2
  -8   5   3 6822.48 172.410   1
  -5   3   8 7288.25 175.772   2
   8   5  -1 125913. 1561.89   1
  -5  -1  -8 124117. 1546.95   1
  -1  -8  -5 123513. 1579.90   2
  -8  -5  -1 123885. 1552.43   1
   8  -5   1 123997. 1558.00   1
  -5   1   8 123511. 1524.47   2
  -8   5   1 123829. 1556.37   1
   8   5   1 121160. 1517.70   1
  -5  -1   8 118438. 1465.74   2
  -5   1  -8 120353. 1531.65   1
   8  -5  -1 122723. 1516.78   1
  -1   8  -5 122457. 1450.09   2
   1  -8  -5 123145. 1543.26   2
  -1  -8   5 125734. 1435.89   2
  -8   5  -1 119443. 1525.96   1
   8  -5  -3 6209.79 158.886   1
  -3  -8   5 6257.12 118.408   2
   3  -8  -5 6274.93 106.762   1
  -5  -3   8 6065.83 118.873   2
   5  -3  -8 5989.79 159.927   2
  -3   8  -5 6254.73 136.173   2
   5   3   8 5855.38 151.737   1
   3   8   5 6072.27 103.887   1
  -5   3  -8 6021.43 174.654   1
   3  -8  -5 6058.18 172.947   2
  -8   5  -3 6084.97 170.937   1
   8   5   3 6252.39 158.164   1
  -3   8  -5 6218.67 173.218   1
   5   8   5 29313.7 415.501   1
   8  -5  -5 30373.0 466.909   1
  -8   5  -5 30767.2 501.192   1
   5  -8  -5 30300.2 501.338   2
  -5   8  -5 29901.4 494.647   1
   8   5   5 29599.1 460.797   1
   5   5   8 30079.3 443.410   1
  -5   5  -8 30708.4 507.873   1
   5  -5  -8 29976.8 441.823   1
   5  -8  -5 31172.4 418.254   1
   5  -5  -8 28648.5 484.665   2
   5  -7  -8 9435.77 182.504   1
   8  -5  -7 9533.10 213.316   1
  -7   8  -5 9638.29 238.615   1
   8   5   7 9226.04 208.154   1
   7   8   5 9586.71 193.379   1
   7  -8  -5 9224.16 193.393   1
   5  -7  -8 9741.19 238.536   2
  -5   7  -8 9720.17 247.975   1
  -8   5  -7 9387.74 241.759   1
   5   7   8 9395.62 182.218   1
  -6  -6  -8 3370.22 105.963   1
  -8  -6  -6 3555.57 116.791   1
  -6  -8  -6 3283.33 97.8983   1
  -6   4   8 16638.7 319.312   2
  -6  -4  -8 17276.5 297.240   1
  -8  -6  -4 16695.0 303.061   1
  -8   6   4 16629.0 306.728   1
  -4  -8  -6 17100.9 247.932   1
  -8  -6  -2 17407.9 313.304   1
  -8   6   2 17190.5 312.571   1
  -2  -8  -6 17556.8 338.056   2
   8  -6   2 17169.6 325.079   1
  -6   2   8 17192.0 305.703   2
  -6  -2  -8 17368.1 309.017   1
   8   6  -2 17329.2 325.099   1
   0  -8  -6 1609.63 87.3926   2
  -8   6   0 1527.41 78.7536   1
   0   8  -6 1547.72 47.7337   2
   8   6   0 1547.50 78.0265   1
   8  -6   0 1540.63 77.5856   1
  -6   0   8 1552.37 67.4285   2
   6   0   8 1501.56 80.0834   1
  -6   0  -8 1609.56 80.9544   1
  -6   2  -8 16524.5 324.131   1
  -6  -2   8 16950.1 268.813   2
  -8   6  -2 16708.6 317.762   1
   8   6   2 16776.6 303.521   1
   6   2   8 16795.2 306.882   1
  -2  -8   6 16866.3 229.625   2
   2  -8  -6 16868.2 327.004   2
   8  -6  -2 17309.2 303.959   1
  -2   8  -6 16129.6 255.332   2
   8   6   4 15782.8 288.216   1
   8  -6  -4 16287.0 292.129   1
  -4   8  -6 15116.9 318.245   1
  -6   4  -8 15762.8 324.792   1
   4  -8  -6 15739.1 320.511   2
  -4  -8   6 16167.8 234.298   2
   6   4   8 16294.7 289.444   1
  -8   6  -4 15881.0 318.637   1
   4  -8  -6 16271.8 237.943   1
   4   8   6 15899.8 235.705   1
   6  -4  -8 15664.3 284.971   1
   6  -8  -6 3333.08 97.0360   1
  -6   8  -6 3657.27 138.396   1
   6   6   8 3104.93 102.001   1
   6   8   6 3226.65 94.0282   1
  -8   6  -6 3038.32 128.559   1
   8   6   6 3181.23 109.597   1
   6  -6  -8 3257.49 103.392   1
  -6   6  -8 3017.29 131.787   1
   6  -8  -6 3170.82 132.879   2
   8  -6  -6 3229.54 112.338   1
   6  -6  -8 3210.86 128.354   2
  -7  -7  -8 31751.8 474.100   1
  -7   7   8 31634.8 537.714   2
  -8   7   7 31850.6 537.390   2
  -8  -7  -7 31242.2 484.440   1
  -7  -8  -7 31516.8 467.243   1
  -5  -8  -7 20215.4 300.871   1
  -7  -5  -8 20069.5 342.438   1
  -8   7   5 19652.4 346.256   1
  -8  -7  -5 19519.7 341.065   1
   8  -7   3 500.862 49.7683   1
  -7   3   8 455.148 44.1919   2
  -3  -8  -7 272.977 43.5860   2
  -8   7   3 497.783 47.1686   1
  -3  -8  -7 385.000 22.0869   1
  -8  -7  -3 562.775 47.2455   1
  -7  -3  -8 487.566 47.0417   1
   8   7  -1 13910.8 280.694   1
  -7   1   8 14268.7 266.700   2
   8  -7   1 14426.5 284.058   1
  -7  -1  -8 14112.9 283.698   1
  -8   7   1 13552.8 273.947   1
  -1  -8  -7 14542.2 305.557   2
   8   7   1 13972.8 270.513   1
   1  -8  -7 13827.3 294.181   2
   8  -7  -1 13955.7 271.125   1
   7  -1  -8 14164.0 283.280   1
  -8   7  -1 13312.7 276.296   1
   7   1   8 13248.5 279.851   1
  -7   1  -8 14039.6 287.806   1
  -7  -1   8 13795.3 251.939   2
  -1   8  -7 13988.9 205.934   2
   3  -8  -7 470.812 55.0604   2
   8   7   3 395.780 39.8780   1
   7   3   8 406.557 41.5284   1
   7  -3  -8 442.860 44.0386   1
   8  -7  -3 440.693 42.2146   1
  -7   3  -8 461.305 55.1493   1
   3  -8  -7 435.674 23.7092   1
  -3  -8   7 365.394 16.8533   2
  -3   8  -7 449.578 33.0414   2
  -8   7  -3 469.621 49.9135   1
   7   5   8 19453.7 336.381   1
  -8   7  -5 19520.5 373.197   1
   8  -7  -5 19788.3 334.232   1
   5   8   7 19270.1 293.670   1
   5  -8  -7 20054.1 379.700   2
   7  -5  -8 19993.6 335.470   1
  -7   5  -8 19953.3 382.958   1
   8   7   5 19133.4 329.775   1
  -5   8  -7 19937.2 382.530   1
  -8   7  -7 31075.5 533.592   1
  -7   7  -8 30395.7 534.431   1
   8   7   7 30130.4 466.383   1
   7  -8  -7 30745.7 455.972   1
  -7   8  -7 30155.4 529.007   1
   7  -7  -8 29618.8 460.798   1
   8  -7  -7 31138.6 475.598   1
   7   8   7 30643.0 452.095   1
   7   7   8 30466.0 459.817   1
  -8  -8  -8 95258.9 1220.94   1
  -8   8   6 3519.53 117.744   1
  -8  -8  -6 3550.96 116.821   1
  -6   8   8 3539.30 141.529   2
  -6  -8  -8 3535.03 104.224   1
  -8   6   8 3871.53 144.963   2
  -8  -6  -8 3282.58 118.190   1
  -8  -4  -8 9016.74 213.402   1
  -4  -8  -8 9336.57 161.140   1
   8  -8   4 9435.46 237.235   1
  -8  -8  -4 9086.13 201.428   1
  -8   8   4 8543.24 202.076   1
  -2  -8  -8 18763.7 377.556   2
  -8  -2  -8 20052.1 357.129   1
  -8   8   2 19898.5 344.231   1
   8  -8   2 19669.9 364.000   1
  -2  -8  -8 19189.9 255.971   1
  -8   2   8 19764.5 352.137   2
   8  -8   0 403631. 4660.26   1
  -8   0   8 393907. 4638.32   2
   8   8   0 393414. 4656.34   1
   8   0  -8 406010. 4687.34   1
   0  -8  -8 395078. 4696.84   2
  -8   0  -8 399917. 4681.04   1
  -8   8   0 398859. 4658.30   1
  -8   8  -2 19847.8 366.218   1
   8  -8  -2 19695.0 344.281   1
  -2   8  -8 20018.8 283.108   2
   2  -8  -8 19729.8 262.981   1
   8  -2  -8 20354.8 365.519   1
  -8   2  -8 19283.9 375.951   1
   8   8   2 20015.4 344.925   1
   2  -8  -8 20183.1 382.358   2
   4  -8  -8 9262.80 239.558   2
  -4   8  -8 9176.92 244.349   1
  -8   4  -8 9400.43 243.925   1
   8   4   8 8968.54 216.268   1
   8  -4  -8 9497.38 216.755   1
   8   8   4 9439.32 206.128   1
   4  -8  -8 9319.12 164.719   1
  -8   8  -4 9589.25 236.456   1
   8  -8  -4 9725.81 206.800   1
   8  -6  -8 4072.99 128.960   1
  -8   8  -6 3978.56 153.254   1
  -6   8  -8 3719.23 152.373   1
   8   8   6 3818.56 119.070   1
   6   8   8 3717.90 107.408   1
   6  -8  -8 3947.94 109.317   1
  -8   6  -8 4022.80 156.689   1
   8   6   8 3739.16 123.136   1
   6  -8  -8 3788.13 150.502   2
   8  -8  -6 3808.23 119.830   1
  -8   8  -8 91227.6 1253.78   1
   8  -8  -8 89464.9 1158.05   1
   8   8   8 88212.5 1150.71   1
   0   1  -9 61218.3 780.921   2
   1  -9   0 62237.3 826.846   2
  -9   0  -1 60755.6 850.560   1
   0  -1  -9 62199.3 808.320   2
  -9   0   1 61551.6 850.640   1
  -1   9   0 62567.2 827.877   2
  -1  -9   0 61725.4 822.188   2
  -9   0  -3 26986.0 451.339   1
  -9   0   3 27561.0 451.701   1
  -3  -9   0 26574.3 426.724   2
   0   3  -9 27690.1 359.053   2
   3  -9   0 26914.1 433.054   2
  -3   9   0 27539.9 434.521   2
   0  -3  -9 26776.2 428.904   2
  -3   9   0 27441.6 400.077   1
  -5   9   0 14129.1 278.176   2
   0  -5  -9 13864.3 282.061   2
  -5   9   0 14076.6 257.389   1
   5   9   0 13861.7 253.946   1
  -9   0  -5 14415.2 291.921   1
   5  -9   0 13887.5 258.306   1
   7   9   0 28610.7 456.789   1
  -7   9   0 28697.0 456.755   1
   0  -7  -9 27791.3 489.053   2
  -7   9   0 29439.6 482.567   2
   7  -9   0 29244.5 462.036   1
  -9   0  -7 28478.3 483.287   1
   9   0  -7 29138.7 488.986   1
   0  -7  -9 29231.6 382.396   1
  -1  -8  -9 59098.9 866.323   2
   9   1  -8 58944.8 855.094   1
  -1  -8  -9 58829.2 707.194   1
  -8   9   1 59454.9 816.641   1
  -8   9   1 59100.2 851.394   2
   9  -1   8 59461.9 860.457   1
  -9   1   8 56659.2 818.188   2
  -9  -1  -8 57510.6 838.944   1
   8  -9   1 59436.8 832.229   1
   6   9  -1 37302.3 558.772   1
  -1  -6  -9 37255.9 593.016   2
   6  -9   1 38377.6 567.783   1
  -9  -1  -6 37961.3 586.189   1
  -6   9   1 38055.7 545.330   1
  -1  -6  -9 38556.8 500.663   1
  -1  -4  -9 1994.58 93.1570   2
  -9   1   4 2270.08 101.733   1
  -4   9   1 2216.83 95.4485   2
  -4   9   1 2291.73 76.6925   1
  -9  -1  -4 2125.86 97.7053   1
  -1  -2  -9 3316.66 109.162   2
  -9  -1  -2 3225.50 118.723   1
   1   2  -9 3327.31 77.6962   2
  -2   9   1 3188.99 112.063   2
  -2   9   1 3283.95 86.0700   1
  -2  -9  -1 3381.14 113.772   2
  -9   1   2 3309.60 120.718   1
   2  -9   1 3240.21 107.923   2
  -9   1   0 3391.68 122.230   1
  -9  -1   0 3261.26 120.621   1
   0   9  -1 3160.03 102.661   2
   1   0  -9 3361.10 92.4398   2
   0  -9  -1 3289.96 112.374   2
   0   9   1 3386.19 113.636   2
   0  -9   1 3183.17 102.859   2
  -2   9  -1 3472.52 103.515   1
  -2   9  -1 3529.55 111.300   2
  -9   1  -2 3415.81 125.209   1
   2  -9  -1 3613.71 118.777   2
  -9  -1   2 3673.86 128.783   1
  -2  -9   1 3428.02 107.298   2
   1  -2  -9 3578.16 109.078   2
  -4   9  -1 1838.81 77.1693   1
   4   9   1 1835.96 68.0029   1
   1  -4  -9 1767.21 84.9047   2
  -9   1  -4 1692.98 91.2076   1
  -4   9  -1 1659.85 78.5485   2
   4  -9  -1 1630.70 84.1322   2
   9  -1  -6 38019.2 577.974   1
  -9   1  -6 37593.6 583.152   1
  -6   9  -1 37487.9 553.079   1
   1  -6  -9 36579.1 578.573   2
   6  -9  -1 36764.3 539.642   1
  -6   9  -1 38199.9 569.743   2
   6   9   1 36340.4 536.156   1
   1  -8  -9 56577.9 834.820   2
  -8   9  -1 58568.2 822.680   2
  -1   8  -9 55727.2 679.641   2
   1  -8  -9 56788.3 686.403   1
   9  -1  -8 57364.5 821.940   1
  -8   9  -1 57303.5 801.836   1
   1  -8  -9 56559.3 683.677   1
  -9   1  -8 56975.5 829.072   1
   8  -9  -1 56394.9 789.782   1
   8   9   1 55407.3 787.909   1
  -2  -7  -9 16844.3 351.878   2
   7   9  -2 17983.5 336.599   1
  -9  -2  -7 17565.7 338.884   1
  -2  -7  -9 18147.6 260.703   1
   7  -9   2 17648.5 339.102   1
  -7   9   2 17719.0 314.046   1
  -2  -5  -9 13947.3 290.243   2
  -5   9   2 14201.0 242.963   1
  -2  -5  -9 13822.2 232.417   1
  -2   5   9 13750.2 283.967   2
  -9  -2  -5 13951.7 285.620   1
  -2  -3  -9 1766.27 72.1239   1
  -2   3   9 1827.72 81.1380   2
  -9   2   3 1671.11 86.8389   1
  -3   9   2 1808.59 58.8733   1
  -3  -9  -2 1710.73 85.2052   2
  -9  -2  -3 1811.64 88.7320   1
  -1  -9  -2 30316.7 468.647   2
   2   1  -9 29914.3 404.500   2
  -1   9   2 29119.6 387.558   1
  -2   1   9 30023.3 434.600   2
   1  -9   2 29103.6 435.478   2
  -9   2   1 29340.0 474.732   1
  -9  -2  -1 29688.4 474.295   1
  -1  -9   2 29221.0 437.103   2
  -9  -2   1 29798.4 481.708   1
   1  -9  -2 30524.2 473.071   2
   2  -1  -9 30187.7 435.920   2
  -1   9  -2 30214.7 443.225   2
  -9   2  -1 30948.9 485.022   1
   3  -9  -2 1830.18 87.0405   2
  -9   2  -3 1772.06 90.8681   1
  -3  -9   2 1764.22 74.0968   2
   3   9   2 1837.42 59.5426   1
  -3   9  -2 1937.10 81.6058   1
  -3   9  -2 1909.46 78.4069   2
   2  -3  -9 1927.67 82.3855   2
   5   9   2 13890.0 238.080   1
   9  -2  -5 14262.1 285.607   1
   9   2   5 13643.0 277.993   1
  -5   9  -2 13894.9 268.100   2
   5  -9  -2 13356.9 241.249   1
   2  -5  -9 13919.9 279.102   2
  -9   2  -5 13776.7 288.830   1
  -5   9  -2 13625.2 266.395   1
  -7   9  -2 18453.9 341.572   1
   7  -9  -2 17958.2 317.589   1
  -7   9  -2 18003.0 344.198   2
   2  -7  -9 18576.2 268.385   1
  -9   2  -7 18301.0 361.266   1
   2  -7  -9 17897.2 356.704   2
   9  -2  -7 19066.7 350.945   1
   7   9   2 18690.6 319.109   1
  -3  -8  -9 1511.32 51.2019   1
  -8   9   3 1435.38 74.4798   1
  -3  -8  -9 1454.58 93.4484   2
  -9  -3  -8 1982.76 96.5371   1
   8  -9   3 1470.02 87.0362   1
  -3   8   9 1335.91 87.5122   2
  -6   9   3 3304.65 101.355   1
  -3  -6  -9 3406.93 89.9384   1
  -3  -6  -9 3149.86 128.203   2
  -9  -3  -6 3261.01 121.681   1
  -9   3   4 5044.90 154.504   1
  -3  -4  -9 4958.37 125.906   1
  -9  -3  -4 4938.04 150.067   1
  -4   9   3 5289.09 114.384   1
  -3   4   9 4878.09 147.494   2
  -3   2   9 36665.4 536.051   2
  -3  -2  -9 36086.9 536.708   1
  -9  -3  -2 36687.5 561.501   1
  -2  -9  -3 35998.0 566.390   2
  -9   3   2 36698.5 564.215   1
  -2   9   3 38170.6 467.827   1
  -3   0   9 1856.50 69.0810   2
   0   9  -3 1909.90 72.7996   2
   0  -9  -3 1913.92 91.8283   2
  -9  -3   0 2140.65 96.2800   1
   0   9   3 2033.27 44.8897   1
  -3   0  -9 2090.88 91.9399   1
   3   0  -9 1932.98 70.8944   2
   0  -9   3 2188.07 74.5078   2
  -9   3   0 1977.66 92.4818   1
  -3  -2   9 37104.6 482.483   2
   2   9   3 36915.6 464.826   1
  -9   3  -2 37177.5 570.245   1
   2  -9  -3 37024.6 564.567   2
   9   3   2 36070.8 559.733   1
  -2  -9   3 37412.0 510.193   2
   3  -2  -9 37243.2 530.717   2
   9  -3  -2 36232.9 559.523   1
  -2   9  -3 37207.2 522.348   2
  -3   2  -9 37341.1 571.454   1
  -4   9  -3 5369.45 153.852   1
   4  -9  -3 5388.61 163.753   2
   3  -4  -9 5259.49 152.793   2
   4  -9  -3 5623.21 120.705   1
  -9   3  -4 5526.42 166.450   1
  -4  -9   3 5640.05 136.883   2
   9  -3  -4 5563.74 159.435   1
   9   3   4 5667.07 159.370   1
  -4   9  -3 5833.85 148.603   2
   4   9   3 5733.44 118.610   1
  -6   9  -3 3130.27 117.576   1
  -6   9  -3 3080.72 112.656   2
   9   3   6 2919.95 112.267   1
  -9   3  -6 2872.87 122.978   1
   6  -9  -3 3013.48 96.0212   1
   6   9   3 2987.28 95.1794   1
   3  -6  -9 2919.67 120.656   2
   9  -3  -6 3049.17 116.734   1
  -9   3  -8 1357.20 89.6397   1
   9  -3  -8 1539.42 85.5468   1
   3  -8  -9 1330.77 48.6362   1
   3  -8  -9 1413.40 90.6954   2
   8   9   3 1363.19 70.9867   1
   8  -9  -3 1396.17 72.2748   1
  -8   9  -3 1483.13 87.0902   1
  -9  -4  -7 11184.6 253.013   1
  -4  -7  -9 11756.7 200.920   1
  -7   9   4 11406.2 225.356   1
  -4   7   9 11290.1 266.489   2
  -9   4   5 18501.4 345.944   1
  -9  -4  -5 18498.3 343.054   1
  -5   9   4 18990.1 291.898   1
  -4  -5  -9 19147.2 304.122   1
  -4   3   9 5548.27 150.445   2
  -9  -4  -3 5259.22 157.195   1
  -9   4   3 5488.96 159.320   1
  -3  -9  -4 5949.72 174.274   2
  -4  -3  -9 5582.04 144.780   1
  -3   9   4 5473.76 103.163   1
  -9   4   1 3136.47 118.860   1
  -4   1   9 3116.58 99.5988   2
  -9  -4  -1 3234.68 118.976   1
  -4  -1  -9 2910.75 108.161   1
  -1  -9  -4 3199.60 121.381   2
  -1   9  -4 3007.50 88.7804   2
   9  -4  -1 3050.79 112.922   1
   4  -1  -9 2935.70 96.5914   2
  -9  -4   1 2969.13 117.155   1
  -1  -9   4 2991.37 83.8688   2
  -9   4  -1 3062.53 118.086   1
  -4   1  -9 2995.43 115.537   1
  -4  -1   9 2889.30 84.4004   2
   1  -9  -4 2908.35 116.406   2
   9   4   1 3054.86 113.894   1
  -3   9  -4 5772.51 141.894   2
  -3   9  -4 6048.78 169.550   1
  -4   3  -9 5838.46 177.339   1
   9  -4  -3 6447.57 170.302   1
  -3  -9   4 6255.06 133.259   2
  -4  -3   9 6184.88 114.750   2
   3   9   4 6182.65 109.319   1
   9   4   3 6395.58 167.514   1
   3  -9  -4 6018.53 174.420   2
   4  -3  -9 5980.94 158.910   2
   3  -9  -4 6071.55 111.752   1
  -9   4  -3 6068.63 175.977   1
   5   9   4 18035.0 284.297   1
   9   4   5 18785.4 336.565   1
   4  -5  -9 18462.5 344.669   2
   5  -9  -4 18769.8 359.307   2
  -9   4  -5 18461.6 358.723   1
  -4   5  -9 19108.1 370.418   1
  -5   9  -4 18692.7 346.827   1
  -5   9  -4 18456.6 319.901   2
   9  -4  -5 18096.3 336.411   1
   5  -9  -4 18282.4 284.526   1
   7  -9  -4 11014.5 215.449   1
   4  -7  -9 11129.9 196.092   1
   4  -7  -9 10321.7 256.126   2
   9  -4  -7 10890.1 243.707   1
  -9   4  -7 10843.5 263.956   1
  -7   9  -4 10485.2 250.820   1
  -4   7  -9 10814.2 273.163   1
   7   9   4 11272.7 217.927   1
  -5  -8  -9 4410.65 109.951   1
  -8  -9  -5 4266.44 128.935   1
  -5   8   9 4045.32 154.610   2
  -9  -5  -8 4259.63 143.299   1
  -9   5   8 4360.33 154.882   2
  -8   9   5 4144.22 127.928   1
  -9  -5  -6 43583.9 651.462   1
  -5  -6  -9 44588.1 608.865   1
  -9   5   6 44447.3 681.215   2
  -6   9   5 45437.8 605.281   1
  -4   9   5 1012.99 42.0478   1
  -5   4   9 1062.09 67.9985   2
  -9   5   4 969.935 65.8630   1
  -5  -4  -9 937.103 55.2738   1
  -9  -5  -4 1022.87 68.1623   1
  -5   2   9 26408.8 415.938   2
  -2  -9  -5 26819.9 455.048   2
  -9   5   2 25922.7 434.696   1
  -5  -2  -9 26463.5 422.259   1
  -9  -5  -2 25969.5 432.729   1
   0  -9  -5 31.4334 23.6715   2
  -5   0   9 6.00439 15.4760   2
  -5   0  -9 58.1624 24.6848   1
   9  -5   0 2.42222 23.8109   1
   0   9  -5 40.3656 14.1217   2
  -9  -5   0 122.408 34.2588   1
   9   5   0 131.254 28.7676   1
  -9   5   0 166.776 34.3271   1
  -9   5  -2 27980.2 466.052   1
   9   5   2 27881.5 455.831   1
  -5  -2   9 27968.7 393.113   2
   2  -9  -5 27412.5 468.840   2
  -5   2  -9 27660.8 469.622   1
  -2  -9   5 29052.6 384.419   2
  -2   9  -5 27113.4 401.818   2
   9  -5  -2 27894.5 451.283   1
  -5  -4   9 957.423 37.5379   2
  -4  -9   5 956.635 46.1232   2
   4  -9  -5 937.811 70.7357   2
   4  -9  -5 966.263 39.9756   1
  -9   5  -4 1166.12 77.2040   1
  -4   9  -5 1029.72 55.8923   2
   9  -5  -4 925.938 62.2410   1
  -5   4  -9 1057.84 76.4465   1
   4   9   5 979.707 38.9419   1
   5  -4  -9 833.696 62.1388   2
   9   5   4 946.088 63.0076   1
  -4   9  -5 872.446 67.0366   1
   6  -9  -5 43298.5 587.852   1
   6   9   5 44161.1 585.489   1
   5  -6  -9 42797.7 596.662   1
  -5   6  -9 43107.1 688.872   1
   9  -5  -6 43596.9 642.874   1
  -9   5  -6 43457.8 676.314   1
  -5  -6   9 43373.7 526.031   2
   9   5   6 43585.1 637.509   1
  -6   9  -5 43697.3 668.855   1
   5  -6  -9 44123.8 666.147   2
  -8   9  -5 4094.86 154.062   1
  -9   5  -8 3953.44 156.798   1
   8  -9  -5 4308.38 127.008   1
   8   9   5 4332.23 125.774   1
  -5   8  -9 3984.11 162.962   1
   5  -8  -9 4210.57 158.563   2
   5  -8  -9 4150.17 109.601   1
   9  -5  -8 4410.12 144.065   1
  -9  -6  -7 5955.77 167.598   1
  -7   9   6 6006.05 147.699   1
  -6   7   9 6073.83 188.345   2
  -6  -7  -9 6235.06 150.138   1
  -9   6   7 6103.59 188.526   2
  -7  -9  -6 5819.41 144.363   1
  -9   6   5 21806.6 381.485   1
  -6  -5  -9 21699.1 358.061   1
  -9  -6  -5 21739.9 378.017   1
  -3  -9  -6 12595.4 286.974   2
  -6   3   9 12619.4 260.470   2
  -9   6   3 12866.0 265.304   1
  -9  -6  -3 12483.7 260.006   1
  -6  -3  -9 12683.1 253.211   1
  -9   6   1 13160.5 272.335   1
  -6  -1  -9 12837.2 264.726   1
  -9  -6  -1 13078.9 270.098   1
  -1  -9  -6 12967.5 287.593   2
   9  -6   1 13150.9 272.848   1
  -6   1   9 12737.7 247.894   2
   9  -6  -1 12564.5 261.152   1
  -1   9  -6 12060.5 205.667   2
   9   6   1 12949.1 264.510   1
  -9   6  -1 13033.4 272.689   1
  -6   1  -9 12240.1 268.763   1
   1  -9  -6 12268.4 277.765   2
  -6  -1   9 12983.1 229.322   2
   9  -6  -3 12543.8 256.340   1
   3   9   6 12224.3 173.046   1
  -9   6  -3 12472.8 272.980   1
   6   3   9 12627.5 255.019   1
  -6   3  -9 12661.3 282.370   1
  -3  -9   6 12497.3 191.951   2
  -3   9  -6 12300.5 220.631   2
   3  -9  -6 12353.6 278.062   2
  -6  -3   9 12137.4 207.257   2
  -3   9  -6 11991.5 273.459   1
   9   6   3 12325.8 257.061   1
   3  -9  -6 12486.5 176.323   1
  -9   6  -5 21345.9 405.655   1
  -5   9  -6 20614.4 400.232   1
  -5   9  -6 21064.0 351.722   2
   5  -9  -6 22124.8 316.558   1
   5   9   6 21070.4 312.475   1
   6  -5  -9 21630.2 358.355   1
   9  -6  -5 21710.6 375.240   1
  -6   5  -9 21525.5 413.675   1
   6   5   9 21409.3 359.530   1
   5  -9  -6 21984.9 410.651   2
   9   6   5 21627.9 371.201   1
  -6  -5   9 22011.6 303.732   2
   9  -6  -7 5869.57 165.911   1
  -7   9  -6 5865.73 188.316   1
   6  -7  -9 5943.15 188.052   2
   6  -7  -9 6128.20 149.504   1
   9   6   7 5814.06 163.860   1
  -9   6  -7 6215.86 196.046   1
   7   9   6 5894.92 142.896   1
  -6   7  -9 5733.78 194.588   1
   6   7   9 5915.90 146.927   1
   7  -9  -6 5998.24 146.369   1
  -7  -8  -9 10658.7 217.114   1
  -9  -7  -8 10760.7 239.463   1
  -8  -9  -7 10823.9 222.806   1
  -7  -6  -9 12621.5 254.166   1
  -7   6   9 12827.5 291.489   2
  -6  -9  -7 13258.1 228.457   1
  -9   7   6 13073.8 269.781   1
  -9  -7  -6 13056.8 266.989   1
   9  -7   4 17796.4 354.964   1
  -9  -7  -4 17324.2 320.299   1
  -9   7   4 17029.1 322.884   1
  -7  -4  -9 17607.2 317.228   1
  -4  -9  -7 17123.6 361.360   2
   9   7  -4 17001.1 346.026   1
  -4  -9  -7 17220.2 248.511   1
  -2  -9  -7 12743.6 296.026   2
  -7   2   9 13626.2 267.805   2
  -7  -2  -9 13098.2 271.514   1
  -9  -7  -2 12936.0 270.438   1
   9  -7   2 13503.7 286.301   1
  -9   7   2 13661.1 275.737   1
  -9   7   0 40308.3 603.974   1
   0  -9  -7 38805.5 623.077   2
   9  -7   0 40060.6 600.163   1
  -7   0   9 38997.5 563.517   2
  -7   0  -9 38465.9 600.364   1
   2  -9  -7 13369.2 295.798   2
  -2   9  -7 13430.9 217.128   2
  -7  -2   9 13135.3 236.304   2
  -7   2  -9 13519.8 294.399   1
  -9   7  -2 13583.0 286.274   1
   7  -2  -9 13026.1 274.068   1
   9   7   2 12907.7 267.647   1
   7   2   9 12918.1 275.048   1
   9  -7  -2 13496.4 271.932   1
   9   7   4 16942.0 318.883   1
  -7   4  -9 17637.9 359.016   1
   7   4   9 16738.4 319.321   1
  -4   9  -7 17690.0 358.017   1
  -4   9  -7 16664.3 285.095   2
   7  -4  -9 17566.6 320.058   1
   4  -9  -7 16894.1 353.624   2
  -4  -9   7 17549.6 243.289   2
   4   9   7 17053.1 248.376   1
   9  -7  -4 17041.5 317.629   1
  -7  -4   9 17123.5 273.098   2
   4  -9  -7 17651.9 249.824   1
  -9   7  -4 16843.4 346.193   1
   6   9   7 12499.2 220.949   1
   9   7   6 12271.7 257.026   1
  -6   9  -7 12695.6 299.263   1
   7  -6  -9 12453.7 250.387   1
  -7   6  -9 12223.8 299.673   1
  -9   7  -6 12401.0 295.009   1
   6  -9  -7 13107.9 223.663   1
   7   6   9 12504.5 252.619   1
   6  -9  -7 12747.1 300.802   2
   9  -7  -6 12827.2 261.586   1
  -9   7  -8 10930.9 285.087   1
  -7   8  -9 10856.6 285.903   1
   8  -9  -7 11353.9 226.083   1
   7   8   9 10913.0 223.346   1
   7  -8  -9 11167.4 223.408   1
   8   9   7 10439.0 219.948   1
   9   7   8 10954.2 239.735   1
  -8   9  -7 10922.3 281.754   1
   9  -7  -8 11072.1 242.825   1
  -9  -8  -7 7838.24 194.886   1
  -8  -7  -9 8337.81 196.847   1
  -7  -9  -8 8220.50 178.075   1
  -8  -5  -9 13474.6 277.810   1
   9  -8   5 13573.1 313.333   1
  -8   5   9 13897.8 301.965   2
  -5  -9  -8 14033.9 224.911   1
  -9   8   5 13404.5 276.710   1
  -9  -8  -5 13668.7 272.939   1
  -3  -9  -8 7786.53 224.730   2
  -9   8   3 7677.43 194.696   1
  -9  -8  -3 7642.60 194.726   1
  -8  -3  -9 7728.07 197.458   1
   9  -8   3 7731.52 212.513   1
  -3  -9  -8 7617.88 121.227   1
   9   8  -3 7538.11 208.237   1
  -1  -9  -8 14996.0 326.656   2
  -9   8   1 14816.2 298.478   1
  -8  -1  -9 14631.2 304.115   1
   9  -8   1 15012.6 304.240   1
  -8   1   9 14451.1 284.571   2
   8  -1   9 14165.7 313.816   1
  -1   9  -8 15302.5 223.737   2
   8  -1  -9 14979.1 312.312   1
  -8   1  -9 15756.9 323.162   1
  -8  -1   9 15068.1 278.876   2
   1  -9  -8 14965.4 329.376   2
  -9   8  -1 15030.2 311.081   1
   9  -8  -1 15759.7 303.670   1
   9   8   1 15273.3 301.035   1
   9   8   3 7537.00 194.403   1
   8  -3  -9 7697.92 200.595   1
  -8   3  -9 7920.65 221.652   1
   3  -9  -8 7852.83 125.546   1
   9  -8  -3 8112.57 195.345   1
  -3   9  -8 7831.69 155.191   2
   3  -9  -8 7652.32 218.691   2
  -9   8  -3 7698.28 212.622   1
  -9   8  -5 13220.3 307.605   1
   9  -8  -5 13790.1 272.396   1
   5  -9  -8 13853.0 224.329   1
   5   9   8 13489.6 223.723   1
   5  -9  -8 13882.0 314.549   2
  -8   5  -9 13622.3 317.941   1
   8   5   9 12862.1 273.192   1
  -5  -9   8 13745.4 198.166   2
  -5   9  -8 13441.4 318.075   1
   9   8   5 13407.6 269.213   1
   8  -5  -9 13999.3 278.534   1
   7   9   8 8351.54 180.195   1
   9   8   7 8341.84 198.172   1
   8  -7  -9 8247.50 196.738   1
  -8   7  -9 8475.76 246.189   1
  -9   8  -7 8275.77 240.666   1
   7  -9  -8 8242.74 180.736   1
   8   7   9 8255.84 198.527   1
  -7   9  -8 8341.31 242.651   1
   9  -8  -7 8413.26 202.134   1
  -9  -9  -8 17741.4 326.813   1
  -9  -8  -9 18054.9 336.162   1
  -8  -9  -9 17633.7 316.941   1
  -9   9   6 2637.99 106.841   1
  -9  -9  -6 2541.75 102.791   1
  -6  -9  -9 2565.25 86.1882   1
  -9  -6  -9 3069.05 119.352   1
  -9   4   9 5898.09 182.501   2
   9  -9   4 5782.14 190.439   1
  -9   9   4 5889.71 167.415   1
  -9  -4  -9 6132.83 178.978   1
   9   9  -4 5909.26 187.274   1
  -4  -9  -9 6241.29 120.534   1
  -4  -9  -9 5711.92 198.615   2
  -9   9   2 39807.9 587.372   1
   9  -2   9 39193.9 631.302   1
  -9  -2  -9 40504.5 605.610   1
  -2  -9  -9 38044.1 459.729   1
   9  -9   2 40510.0 616.238   1
  -2  -9  -9 39533.8 637.905   2
   9   0   9 63.7490 26.2512   1
  -9   0  -9 60.7668 33.4736   1
  -9   0   9 78.8547 24.8051   2
  -9   9   0 51.0180 29.8523   1
   0  -9  -9 23.6480 27.2520   2
   9   0  -9 24.4937 29.5492   1
   9  -9   0 87.6624 30.3390   1
  -9   9   0 73.8441 29.3790   2
   2  -9  -9 39581.8 627.583   2
   2  -9  -9 37915.8 459.625   1
   9  -2  -9 39315.2 603.657   1
   9   9   2 39679.4 579.184   1
  -9   9  -2 39119.3 602.794   1
  -9   2  -9 38875.2 621.264   1
  -2   9  -9 38666.4 488.555   2
   9  -9  -2 40256.5 582.088   1
  -4   9  -9 6372.01 208.911   1
  -9   4  -9 6488.53 204.720   1
   9   9   4 6364.25 171.251   1
  -4   9  -9 6157.16 141.008   2
   4  -9  -9 6574.56 204.564   2
  -9   9  -4 6251.97 196.156   1
   9  -4  -9 6430.21 183.083   1
   9  -9  -4 6338.92 168.985   1
   4  -9  -9 6430.60 125.614   1
   6  -9  -9 2664.48 86.9301   1
   9  -9  -6 2551.45 101.235   1
  -9   9  -6 2567.96 126.541   1
   9   9   6 2500.99 98.9028   1
  -6  -9   9 2413.33 59.3596   2
  -6   9  -9 2428.03 127.707   1
   6   9   9 2526.85 85.0661   1
   6  -9  -9 2464.57 127.465   2
  -9   6  -9 2399.49 126.452   1
   9  -6  -9 2487.16 107.691   1
   8   9   9 18516.3 323.850   1
  -9   9  -8 18565.8 404.089   1
   9   9   8 17906.8 330.881   1
   9  -9  -8 17813.2 330.564   1
   8  -9  -9 18327.5 323.602   1
   9   8   9 18125.7 339.657   1
  -9   8  -9 17542.3 399.269   1
   9  -8  -9 18843.4 341.036   1
  -8   9  -9 18592.5 405.393   1
   0 -10   0 175034. 2145.43   2
   0   0 -10 176683. 2108.46   2
   0  10   0 176710. 2150.34   2
 -10   0   0 175297. 2178.86   1
  -2  10   0 8053.45 166.097   1
  -2  10   0 7669.81 187.588   2
 -10   0  -2 7995.54 206.253   1
 -10   0   2 7619.86 204.854   1
   0  -2 -10 7934.27 181.718   2
  -2 -10   0 7711.14 184.926   2
   0   2 -10 7821.13 148.422   2
   2 -10   0 8170.90 191.764   2
 -10   0  -4 917.631 70.7664   1
  -4  10   0 939.598 54.1396   1
  -4  10   0 976.303 64.8885   2
   0  -4 -10 951.489 65.3219   2
  -4 -10   0 998.504 64.7260   2
   0   4 -10 984.479 33.9787   2
   0  -6 -10 27754.0 470.058   2
   6 -10   0 28424.5 437.725   1
   6  10   0 28541.8 432.699   1
 -10   0  -6 28477.3 474.544   1
  -6  10   0 29063.6 466.568   2
  -6  10   0 27347.5 429.757   1
  -8  10   0 4473.03 156.777   2
 -10   0  -8 4510.15 160.996   1
   8  10   0 4521.78 143.484   1
  -8  10   0 4167.67 141.368   1
   0  -8 -10 4192.44 158.181   2
   0  -8 -10 4462.45 90.3057   1
  10   0   8 4305.34 158.129   1
   8 -10   0 4341.83 144.234   1
  10   0  -8 4681.72 162.946   1
  -1  -9 -10 35813.1 604.458   2
 -10  -1  -9 35524.6 583.165   1
   9 -10   1 36416.9 575.393   1
  -9  10   1 36510.2 560.487   1
  -1  -9 -10 34402.7 431.524   1
  -1  -7 -10 49738.4 620.003   1
  10  -1   7 46604.2 731.912   1
  -7  10   1 47118.8 682.213   1
   7 -10   1 48232.9 704.129   1
   7  10  -1 48050.1 697.246   1
 -10  -1  -7 47312.4 722.497   1
  -7  10   1 48871.5 726.275   2
  -1  -7 -10 47786.9 735.616   2
  -1  -5 -10 3391.14 98.4235   1
 -10  -1  -5 3402.73 131.934   1
  -5  10   1 3137.38 123.466   2
  -5  10   1 3413.21 103.864   1
  -1  -5 -10 3185.37 124.796   2
  -3  10   1 1295.64 73.9612   2
  -3  10   1 1151.31 53.6621   1
  -1  -3 -10 1154.78 69.3385   2
   1   3 -10 1205.60 40.8889   2
 -10  -1  -3 1278.70 80.6591   1
 -10   1   3 1198.93 77.3829   1
  -3 -10  -1 1174.92 71.9725   2
   3 -10   1 1235.56 69.8844   2
  -1  -1 -10 47278.7 650.027   2
  -1 -10  -1 45741.7 670.199   2
 -10   1   1 46529.0 693.372   1
  -1  10   1 47456.0 608.422   1
   1   1 -10 46770.0 612.289   2
 -10  -1  -1 45470.7 689.378   1
   1 -10   1 46727.7 656.011   2
  -1  10   1 46365.0 676.267   2
   1 -10  -1 48638.3 688.084   2
  -1  10  -1 47937.3 673.671   2
 -10   1  -1 48417.0 707.838   1
  -1   1 -10 48320.9 640.879   2
   1  -1 -10 48119.2 652.409   2
  -1 -10   1 46870.4 667.350   2
 -10  -1   1 47076.6 708.846   1
 -10   1  -3 1249.20 82.0227   1
 -10  -1   3 1296.31 82.2487   1
  -3 -10   1 1280.53 69.4781   2
   3 -10  -1 1382.07 78.1340   2
   1  -3 -10 1486.86 75.3960   2
  -3  10  -1 1423.31 73.2620   2
  -3  10  -1 1459.88 68.3151   1
  10  -1  -5 3639.39 134.527   1
   5  10   1 3465.02 104.732   1
   1  -5 -10 3190.73 123.144   2
  -5  10  -1 3345.61 122.487   2
 -10   1  -5 3560.60 136.713   1
  -5  10  -1 3434.39 114.247   1
  -1   7 -10 47437.6 581.095   2
   7 -10  -1 48314.6 689.788   1
  10  -1  -7 50405.0 734.773   1
   1  -7 -10 49180.6 738.816   2
  10   1   7 49246.7 732.108   1
 -10   1  -7 48700.1 738.250   1
   7  10   1 49929.2 686.878   1
  -7  10  -1 49551.8 702.831   1
  -7  10  -1 50287.0 725.603   2
  10  -1  -9 34611.3 567.629   1
   1  -9 -10 33531.0 576.902   2
 -10   1  -9 34263.4 570.625   1
   1  -9 -10 32809.8 413.005   1
   9 -10  -1 34449.8 536.570   1
   1  -9 -10 33337.9 411.947   1
  -9  10  -1 33778.7 544.737   1
  10   1   9 33806.1 566.450   1
  -1   9 -10 32623.6 408.947   2
  -8  10   2 8373.90 199.920   1
   8 -10   2 8577.30 220.853   1
 -10  -2  -8 8136.62 217.946   1
  -2  -8 -10 8003.97 230.214   2
  -2   8  10 8246.52 231.321   2
  -2  -8 -10 8097.73 142.525   1
  -6  10   2 5445.27 139.781   1
  -6  10   2 5213.08 168.195   2
  -2  -6 -10 5304.05 171.707   2
 -10  -2  -6 5297.61 169.665   1
  -2  -6 -10 5489.64 123.910   1
  -4  10   2 20098.3 304.400   1
  -2  -4 -10 18987.3 360.817   2
  -4 -10  -2 19666.7 367.225   2
  -2  -4 -10 19887.3 323.721   1
 -10  -2  -4 19485.9 368.264   1
  -4  10   2 20280.9 369.777   2
 -10   2   4 20038.6 371.329   1
  -2   4  10 19739.1 358.034   2
  -2 -10  -2 59751.3 843.768   2
 -10   2   2 60221.0 853.920   1
   2   2 -10 61098.1 753.447   2
 -10  -2  -2 59835.3 853.858   1
   2 -10   2 59392.2 813.602   2
  -2  10   2 60978.5 754.948   1
  -2  10   2 61940.1 851.488   2
  -2  -2 -10 61090.5 821.701   1
   0  10   2 106.786 14.8630   1
   0 -10   2 102.828 23.7987   2
   0 -10  -2 125.479 31.7398   2
   2   0 -10 65.3417 18.2467   2
   0  10  -2 99.1293 23.3506   2
 -10   2   0 90.7349 34.2644   1
 -10  -2   0 108.342 38.6011   1
   0  10   2 56.6455 26.0552   2
 -10  -2   2 59104.7 853.248   1
  -2  10  -2 60983.4 809.114   2
  -2 -10   2 60018.3 798.408   2
 -10   2  -2 60157.5 855.493   1
   2  -2 -10 59856.8 804.649   2
   2 -10  -2 59184.9 837.019   2
  -2  10  -2 60567.0 812.189   1
  -4 -10   2 19292.7 327.154   2
   2  -4 -10 19130.3 343.529   2
  10  -2  -4 19521.0 358.497   1
   4  10   2 18577.9 292.945   1
  -4  10  -2 18876.0 335.737   2
   4 -10  -2 18800.0 358.669   2
  -4  10  -2 19020.0 333.569   1
 -10   2  -4 18445.4 363.852   1
  -6  10  -2 5191.00 153.837   1
  10  -2  -6 5230.30 166.431   1
 -10   2  -6 5253.44 173.653   1
  -6  10  -2 5354.24 158.007   2
   2  -6 -10 5242.78 165.771   2
   6 -10  -2 5003.64 135.226   1
   6  10   2 5155.80 134.798   1
   8  10   2 7851.17 191.931   1
  -8  10  -2 8075.84 209.714   1
  10   2   8 7844.33 215.297   1
   8 -10  -2 7971.63 193.569   1
  10  -2  -8 8233.68 218.609   1
   2  -8 -10 7701.15 223.524   2
  -8  10  -2 7885.86 212.624   2
 -10   2  -8 8249.52 227.924   1
  -2   8 -10 7918.99 134.938   2
   2  -8 -10 7938.57 142.157   1
 -10   3   9 11558.4 267.966   2
  -3  -9 -10 10977.7 289.488   2
   9  10  -3 11468.5 272.595   1
   9 -10   3 11192.4 275.003   1
 -10  -3  -9 11032.5 266.224   1
  -9  10   3 11067.5 246.791   1
  -3  -9 -10 11378.3 179.012   1
  -7  10   3 17712.4 307.858   1
 -10  -3  -7 16828.3 344.932   1
 -10   3   7 17824.8 348.442   2
  -3   7  10 17125.2 355.541   2
  -3  -7 -10 17757.2 273.281   1
  -3  -7 -10 16933.5 360.701   2
 -10  -3  -5 31411.5 514.701   1
 -10   3   5 31830.2 520.048   1
  -3  -5 -10 31581.8 457.059   1
  -5  10   3 30810.9 447.990   1
 -10   3   3 17091.2 338.198   1
 -10  -3  -3 17574.9 337.198   1
  -3  -3 -10 17059.1 305.457   1
  -3  10   3 17946.0 258.973   1
  -3   3  10 17072.5 317.535   2
  -3 -10  -3 17714.8 340.789   2
  -3   1  10 24074.8 389.327   2
  -1  10   3 25583.7 327.167   1
 -10  -3  -1 24848.3 434.539   1
   1 -10   3 25429.2 389.266   2
  -3  -1 -10 25437.8 419.056   1
 -10   3   1 25180.3 436.918   1
   3   1 -10 25130.3 364.115   2
  -1 -10  -3 25390.6 432.856   2
  -3   1 -10 24815.7 432.750   1
   1 -10  -3 25715.2 433.350   2
 -10  -3   1 24986.6 438.965   1
  -3  -1  10 25282.6 367.235   2
 -10   3  -1 25519.0 439.012   1
   3  -1 -10 24182.6 385.619   2
  -1  10  -3 25008.3 389.882   2
  -1 -10   3 25950.6 384.199   2
  -3  10  -3 16991.8 298.213   2
  -3 -10   3 16070.6 284.206   2
   3 -10  -3 16729.1 329.140   2
  10  -3  -3 17332.5 330.653   1
   3  10   3 16732.9 247.704   1
 -10   3  -3 16728.0 337.650   1
   3  -3 -10 16937.9 306.511   2
  -3  10  -3 16800.6 313.466   1
  10  -3  -5 33091.0 535.294   1
  -5  10  -3 33627.3 513.811   2
   5 -10  -3 35140.4 557.151   2
   3  -5 -10 32318.2 528.811   2
   5 -10  -3 33779.0 472.154   1
  -5  10  -3 33049.4 525.716   1
   5  10   3 33283.6 466.952   1
 -10   3  -5 33325.0 551.218   1
  -7  10  -3 18059.7 341.845   2
  10  -3  -7 17794.2 349.776   1
   3  -7 -10 18335.0 280.091   1
  -7  10  -3 17136.4 341.568   1
   3  -7 -10 17624.8 356.546   2
   7  10   3 17736.8 306.674   1
   7 -10  -3 17918.8 310.077   1
 -10   3  -7 17270.4 363.933   1
   3  -9 -10 10408.1 170.773   1
   3  -9 -10 10658.9 276.221   2
  10   3   9 10518.6 258.382   1
 -10   3  -9 9908.29 270.532   1
  -9  10  -3 10547.7 255.842   2
  10  -3  -9 10436.3 256.244   1
   9 -10  -3 10697.7 236.576   1
  -3   9 -10 10533.2 182.847   2
   9  10   3 10390.0 233.011   1
  -9  10  -3 10591.3 261.179   1
 -10   4   8 6345.82 192.530   2
  -4  -8 -10 6162.87 206.043   2
  -4  -8 -10 6623.75 137.837   1
 -10  -4  -8 6307.50 188.519   1
  -8  10   4 6446.85 167.374   1
  -4  -6 -10 40348.5 553.185   1
 -10   4   6 41925.0 635.287   2
  -6  10   4 39642.3 552.104   1
 -10  -4  -6 41488.5 619.454   1
  -4  -4 -10 16635.9 294.532   1
  -4  10   4 16632.9 254.402   1
  -4   4  10 16518.5 320.771   2
 -10   4   4 16767.3 330.546   1
  -4 -10  -4 16976.6 345.384   2
 -10  -4  -4 17157.1 330.086   1
  -2 -10  -4 23451.7 419.397   2
  -4   2  10 23235.1 383.303   2
 -10   4   2 23522.8 412.762   1
  -2  10   4 23574.4 301.478   1
  -4  -2 -10 23485.3 392.083   1
 -10  -4  -2 22846.2 409.051   1
 -10   4   0 22927.5 404.404   1
   0  10  -4 22099.4 347.245   2
   0 -10  -4 22605.2 406.375   2
   0 -10   4 22594.0 344.121   2
  -4   0  10 22535.2 351.559   2
 -10  -4   0 22083.4 401.128   1
  -4   0 -10 22692.9 395.885   1
  -2 -10   4 22420.5 335.035   2
   2  10   4 21189.6 280.494   1
   2 -10  -4 21879.2 398.513   2
  -2  10  -4 21571.2 347.582   2
   4  -2 -10 21736.0 362.507   2
  -4   2 -10 22037.3 401.735   1
  10  -4  -2 22655.9 391.543   1
  -4  -2  10 22420.5 320.664   2
 -10   4  -2 22441.9 402.379   1
   4 -10  -4 16926.0 348.144   2
 -10   4  -4 17590.7 351.860   1
   4  10   4 17897.5 261.681   1
  -4  10  -4 17817.0 309.204   2
  10  -4  -4 18007.4 340.107   1
  -4   4 -10 17242.5 356.275   1
  -4 -10   4 17761.1 291.289   2
   4  -4 -10 17143.3 326.660   2
   4 -10  -4 17383.0 265.162   1
  -4  10  -4 17296.5 335.773   1
  -4  -4  10 17874.6 242.662   2
  -6  10  -4 42659.0 627.461   2
   4  -6 -10 41410.7 650.591   2
   6  10   4 43236.8 580.604   1
  10  -4  -6 42998.0 645.765   1
   6 -10  -4 41452.0 582.480   1
  -4   6 -10 43276.5 685.510   1
 -10   4  -6 42356.2 671.345   1
   4  -6 -10 41933.3 585.276   1
  -6  10  -4 43002.2 653.812   1
  10  -4  -8 6262.94 186.149   1
   4  -8 -10 6403.62 200.871   2
 -10   4  -8 6420.86 207.166   1
  -8  10  -4 6421.88 184.714   2
   8  10   4 6404.99 163.017   1
  -4   8 -10 6534.81 214.779   1
   4  -8 -10 6280.94 136.354   1
   8 -10  -4 6532.36 164.416   1
  -8  10  -4 6178.22 193.358   1
 -10  -5  -9 12222.1 279.859   1
  -5  -9 -10 11808.2 310.360   2
  -9  10   5 12119.1 256.050   1
  -5  -9 -10 12516.9 214.144   1
 -10  -5  -7 5686.72 171.451   1
 -10   5   7 5445.60 178.442   2
  -5   7  10 5378.83 179.111   2
  -5  -7 -10 5543.33 136.549   1
  -7  10   5 5757.44 144.117   1
  -5  10   5 27638.0 388.241   1
  -5  -5 -10 27468.9 422.638   1
 -10   5   5 27823.4 481.645   2
 -10  -5  -5 26628.4 459.626   1
 -10   5   5 26927.2 462.255   1
 -10  -5  -3 5740.27 170.292   1
 -10   5   3 5732.99 171.505   1
  -3  10   5 5767.11 100.030   1
  -3 -10  -5 5641.11 180.038   2
  -5  -3 -10 5763.02 155.348   1
  -5   3  10 5612.54 159.554   2
  10  -5   1 13441.8 281.683   1
 -10  -5  -1 13179.4 279.191   1
  -5  -1 -10 12701.4 266.961   1
  -5   1  10 12212.6 243.884   2
 -10   5   1 13181.5 280.794   1
  -1 -10  -5 12560.3 286.223   2
  -1 -10   5 13713.5 228.846   2
   1 -10  -5 13744.6 298.332   2
  -5   1 -10 14252.8 295.881   1
  -5  -1  10 13724.0 239.795   2
  -1  10  -5 13821.0 238.521   2
 -10   5  -1 13520.3 296.383   1
  10  -5  -1 14412.9 290.322   1
   5  -3 -10 6062.04 164.995   2
   3 -10  -5 6127.81 185.097   2
   3  10   5 5930.38 100.215   1
  -3  10  -5 5950.36 144.895   2
  -5   3 -10 6039.85 186.442   1
  -3 -10   5 6048.76 132.252   2
  10  -5  -3 6178.94 174.352   1
 -10   5  -3 6003.35 183.582   1
  -3  10  -5 6220.27 182.297   1
  -5  -3  10 6258.56 123.934   2
  -5  10  -5 26065.3 460.346   1
   5  -5 -10 26275.0 410.228   1
  -5  -5  10 25487.4 336.547   2
  -5  10  -5 26118.9 417.188   2
   5  -5 -10 26163.6 451.138   2
  -5 -10   5 25776.7 390.924   2
  -5   5 -10 25685.4 478.106   1
  10  -5  -5 26756.6 448.828   1
   5 -10  -5 26816.6 473.534   2
 -10   5  -5 26049.6 470.183   1
   5  10   5 26188.9 366.696   1
   5 -10  -5 26276.5 371.198   1
   7  10   5 5803.99 140.411   1
  -5   7 -10 5691.58 197.640   1
   7 -10  -5 5616.32 141.128   1
  10  -5  -7 5771.64 171.782   1
   5  -7 -10 5561.30 140.722   1
  -7  10  -5 5628.78 182.616   1
 -10   5  -7 5857.14 193.038   1
  -7  10  -5 6105.13 169.613   2
   5  -7 -10 5650.73 184.122   2
  -5   9 -10 11756.7 308.473   1
   5  -9 -10 11997.3 298.518   2
  10   5   9 11492.1 268.048   1
  -9  10  -5 12054.8 293.503   1
   9 -10  -5 11885.7 249.424   1
   9  10   5 11974.9 247.638   1
   5  -9 -10 12030.5 211.640   1
 -10   5  -9 12042.3 305.783   1
  10  -5  -9 11544.4 270.305   1
  -6  -8 -10 14425.3 260.905   1
  -8  10   6 14235.6 273.127   1
 -10  -6  -8 14553.6 303.071   1
  -6   6  10 11071.3 266.691   2
 -10   6   6 11083.7 256.582   1
 -10  -6  -6 11090.0 252.985   1
  -6  -6 -10 10724.6 223.770   1
  -6  10   6 11397.3 206.292   1
  -6  -4 -10 7981.41 193.358   1
  -4 -10  -6 8359.14 233.912   2
 -10   6   4 8200.39 210.334   1
  10   6  -4 8392.43 225.634   1
 -10  -6  -4 8384.16 209.726   1
  10  -6   2 12281.0 264.143   1
  -2 -10  -6 12128.3 275.338   2
  -6   2  10 11693.0 236.141   2
 -10  -6  -2 11668.6 253.162   1
 -10   6   2 11801.3 255.139   1
  -6  -2 -10 11495.0 241.499   1
  -6   0  10 12.7776 17.5381   2
   0  10  -6 68.3735 16.3801   2
  -6   0 -10 37.4673 27.4927   1
  10  -6   0 72.7047 28.7414   1
   0 -10  -6 61.1739 31.4608   2
 -10   6   0 25.7450 30.4358   1
  -2 -10   6 11991.2 194.439   2
  10  -6  -2 12491.6 263.805   1
  -2  10  -6 11595.8 213.246   2
  -6  -2  10 11658.8 213.135   2
   2 -10  -6 12051.7 280.911   2
 -10   6  -2 11703.3 272.562   1
  -6   2 -10 11967.1 275.531   1
  -4  10  -6 8078.55 222.464   1
  10  -6  -4 8422.26 207.901   1
   4 -10  -6 8391.09 141.131   1
   4  10   6 8195.33 136.528   1
   6  -4 -10 7664.14 190.694   1
  -6   4 -10 7803.37 226.231   1
  -4 -10   6 7970.96 153.787   2
  -6  -4  10 8305.30 150.075   2
  -4  10  -6 8248.06 179.329   2
 -10   6  -4 8209.18 223.657   1
   4 -10  -6 8275.77 226.599   2
   6  10   6 11252.0 201.144   1
  -6  -6  10 11308.4 169.672   2
   6  -6 -10 11128.7 227.714   1
  -6  10  -6 11693.8 239.926   2
  -6   6 -10 11137.1 287.233   1
  -6  10  -6 11125.7 275.312   1
 -10   6  -6 10954.8 277.346   1
   6  -6 -10 10718.1 263.917   2
   6 -10  -6 10969.8 203.118   1
   6 -10  -6 11026.1 278.305   2
  10  -6  -6 11358.5 254.535   1
   6  -8 -10 13714.0 255.465   1
   8 -10  -6 14204.6 265.404   1
 -10   6  -8 14657.7 341.627   1
   8  10   6 13862.3 263.229   1
  -8  10  -6 14566.9 329.993   1
  10  -6  -8 13863.3 295.979   1
  -6   8 -10 14637.0 343.727   1
   6  -8 -10 14592.9 332.448   2
 -10  -7  -9 4616.53 155.490   1
  -7  -9 -10 4731.04 131.083   1
  -9 -10  -7 4873.71 144.463   1
  -7  -7 -10 12093.8 242.491   1
 -10  -7  -7 11413.5 260.619   1
  -7 -10  -7 11954.8 222.991   1
 -10   7   5 6171.87 178.163   1
  -7  -5 -10 6030.01 163.704   1
  -5 -10  -7 5817.54 199.393   2
  -7   5  10 5997.63 184.799   2
 -10  -7  -5 6369.84 178.803   1
  10   7  -3 1238.51 81.5666   1
 -10  -7  -3 1215.64 76.4295   1
  -3 -10  -7 1110.60 84.6289   2
 -10   7   3 1171.67 75.9860   1
  10  -7   3 1174.76 79.7685   1
  -7  -3 -10 1056.80 70.5611   1
  -1 -10  -7 36175.8 603.921   2
  -7  -1 -10 35966.7 575.890   1
 -10   7   1 37790.3 583.618   1
  10  -7   1 37170.4 586.020   1
  -7   1  10 36545.4 548.878   2
  10  -7  -1 35291.2 555.864   1
   1 -10  -7 35231.0 582.918   2
  -7   1 -10 35367.8 569.320   1
  -7  -1  10 34503.6 507.527   2
 -10   7  -1 34497.5 563.591   1
  -1  10  -7 34767.9 470.515   2
   3 -10  -7 1193.59 85.0913   2
 -10   7  -3 1263.82 84.4306   1
  -7   3 -10 1390.81 90.5727   1
   7  -3 -10 1247.40 75.9784   1
  -7  -3  10 1343.32 58.4144   2
  -3 -10   7 1328.61 44.5980   2
  10  -7  -3 1307.20 77.9145   1
  -3  10  -7 1145.34 55.5875   2
  -5 -10   7 6285.86 126.402   2
  10  -7  -5 6324.81 176.484   1
   5 -10  -7 6397.70 126.841   1
  -7   5 -10 5999.29 201.617   1
   7   5  10 6428.62 173.672   1
   5  10   7 6549.22 126.890   1
  -5  10  -7 6248.01 157.370   2
   7  -5 -10 6342.34 170.245   1
   5 -10  -7 6145.55 200.640   2
  -7  -5  10 6119.50 128.226   2
 -10   7  -5 6051.68 195.872   1
  -5  10  -7 6387.61 200.796   1
 -10   7  -7 10959.1 288.026   1
   7  -7 -10 11180.2 234.140   1
  10  -7  -7 11200.1 254.259   1
  -7   7 -10 10597.2 288.632   1
   7  10   7 11382.9 212.546   1
   7   7  10 11430.4 236.662   1
  -7  -7  10 11245.9 179.217   2
  -7  10  -7 10998.2 283.789   1
   7 -10  -7 11014.0 212.689   1
   7   9  10 4902.01 137.010   1
   7  -9 -10 4712.87 133.725   1
  -9  10  -7 5004.00 187.863   1
 -10   7  -9 4854.67 189.052   1
   9  10   7 5025.44 144.827   1
  10  -7  -9 5092.99 160.992   1
   7  -9 -10 4963.63 189.486   2
   9 -10  -7 4921.04 144.294   1
  -7   9 -10 5085.22 196.371   1
  -8 -10  -8 22668.3 373.820   1
 -10  -8  -8 23122.7 409.192   1
  -8  -8 -10 22812.3 387.853   1
  -6 -10  -8 10371.4 188.329   1
 -10  -8  -6 9737.07 233.792   1
  -8  -6 -10 10017.5 230.211   1
 -10   8   6 9931.07 236.873   1
  -4 -10  -8 7658.61 234.263   2
  -8   4  10 7833.60 212.307   2
 -10  -8  -4 7876.18 204.338   1
 -10   8   4 7962.50 206.946   1
  -8  -4 -10 7745.17 201.260   1
  -2 -10  -8 53197.3 815.339   2
  10   8  -2 53117.0 791.187   1
 -10   8   2 53471.6 775.717   1
  -8  -2 -10 51943.6 774.569   1
  10  -8   2 54080.5 793.221   1
  -8   0  10 2744.65 103.332   2
  -8   0 -10 2702.98 121.251   1
   0 -10  -8 2612.25 126.663   2
 -10   8   0 2724.87 120.504   1
  10  -8   0 2867.98 119.153   1
  -2  10  -8 54054.2 697.314   2
 -10   8  -2 53789.9 805.168   1
  -8   2 -10 53994.9 815.197   1
   8  -2 -10 55516.0 795.928   1
   2 -10  -8 54007.3 826.164   2
  -8  -2  10 55000.8 736.720   2
  10  -8  -2 54539.6 783.708   1
   4 -10  -8 8335.20 138.857   1
  -4  10  -8 8484.81 242.504   1
  -8   4 -10 8552.29 239.929   1
 -10   8  -4 8085.91 231.580   1
   4 -10  -8 8386.86 237.453   2
  -4 -10   8 8290.61 129.320   2
  -4  10  -8 7857.07 173.068   2
  -8  -4  10 8337.01 170.805   2
   8  -4 -10 8479.48 211.666   1
  10  -8  -4 8039.67 205.860   1
   6 -10  -8 9261.29 182.204   1
  -8   6 -10 10042.2 273.496   1
   6  10   8 9771.41 182.969   1
   8   6  10 9226.99 223.694   1
  -6  10  -8 9471.98 264.246   1
   8  -6 -10 9733.64 224.376   1
  -6 -10   8 10092.8 169.708   2
   6 -10  -8 9798.49 267.536   2
 -10   8  -6 9928.06 266.398   1
  10  -8  -6 9644.40 226.861   1
   8   8  10 22435.1 383.625   1
   8 -10  -8 21870.6 365.719   1
 -10   8  -8 21365.8 449.676   1
   8  -8 -10 23296.9 383.989   1
  -8   8 -10 22000.6 461.104   1
  10  -8  -8 23388.2 404.853   1
   8  10   8 21728.1 364.974   1
  -8  10  -8 22493.3 457.864   1
  -9 -10  -9 39969.8 606.471   1
 -10  -9  -9 41319.0 626.972   1
  -9  -9 -10 42008.2 616.274   1
  -7 -10  -9 9704.54 199.700   1
 -10  -9  -7 10243.4 236.051   1
  -9  -7 -10 9978.16 233.451   1
  -9  -5 -10 33542.7 544.405   1
 -10  -9  -5 33955.6 537.967   1
  -5 -10  -9 33802.1 607.837   2
 -10   9   5 33920.8 541.992   1
  -5 -10  -9 33815.0 455.295   1
 -10   9   3 642.609 58.6710   1
  -3 -10  -9 571.758 66.2088   2
  -9   3  10 606.907 58.7233   2
  10   9  -3 671.262 66.2482   1
  -9  -3 -10 599.846 60.3892   1
 -10   9   1 27580.9 478.703   1
  10  -9   1 28348.1 488.026   1
  -1 -10  -9 27404.7 510.446   2
  10   9  -1 27354.0 478.622   1
  -9  -1 -10 27908.3 487.588   1
   9   1  10 26370.3 483.207   1
  -9   1 -10 26405.6 488.147   1
 -10   9  -1 26353.2 475.972   1
  -9  -1  10 26809.3 437.813   2
   9  -1 -10 28418.1 488.333   1
  -1  10  -9 27282.6 360.453   2
  10  -9  -1 27654.0 466.551   1
   1 -10  -9 26671.5 499.010   2
   9  -3 -10 753.893 64.8850   1
   3 -10  -9 586.772 23.2716   1
  -9  -3  10 717.046 50.6063   2
  -9   3 -10 705.428 70.0509   1
  -3  10  -9 648.080 38.9910   2
   9   3  10 700.134 62.4843   1
   3 -10  -9 797.569 75.3052   2
  10  -9  -3 672.809 57.1502   1
 -10   9  -3 688.124 68.9470   1
  -5  10  -9 33031.1 590.504   1
 -10   9  -5 33749.6 578.212   1
  -5  10  -9 31965.9 487.912   2
   5 -10  -9 33236.5 448.756   1
  10  -9  -5 33668.5 528.492   1
   5 -10  -9 33374.0 588.772   2
   9  -5 -10 32969.0 538.024   1
  -9   5 -10 33085.4 589.534   1
   7 -10  -9 8868.80 261.437   2
 -10   9  -7 8489.17 256.175   1
  -7  10  -9 9512.96 269.981   1
  -9   7 -10 8770.95 263.694   1
   7 -10  -9 8690.64 184.800   1
   7  10   9 8688.70 185.278   1
   9  -7 -10 9068.62 219.284   1
  10  -9  -7 8958.12 215.903   1
   9   9  10 41272.3 623.907   1
  -9  10  -9 41793.1 719.196   1
  10  -9  -9 41932.8 635.362   1
 -10   9  -9 42389.0 721.752   1
   9  -9 -10 42773.2 626.461   1
  -9   9 -10 42290.4 726.889   1
   9 -10  -9 41324.9 611.801   1
   9  10   9 40555.4 612.843   1
 -10 -10 -10 83525.9 1120.55   1
 -10  -8 -10 3971.76 142.588   1
  -8 -10 -10 3907.91 123.730   1
 -10 -10  -8 4073.58 138.706   1
 -10  -6 -10 25603.0 455.800   1
 -10  10   6 24890.1 438.856   1
 -10 -10  -6 25565.5 438.318   1
  -6 -10 -10 26483.3 382.443   1
  -4 -10 -10 82470.7 1181.10   2
  -4 -10 -10 81942.4 985.557   1
 -10  10   4 80776.7 1101.90   1
 -10  -4 -10 79634.5 1120.03   1
  10 -10   2 25860.2 475.405   1
 -10  10   2 26020.2 453.173   1
 -10   2  10 26010.2 456.027   2
  -2 -10 -10 25721.1 501.849   2
 -10  -2 -10 26070.3 471.181   1
  10  10  -2 25934.5 470.395   1
 -10   0 -10 24100.1 452.589   1
   0 -10 -10 24144.0 468.318   2
 -10  10   0 23602.7 432.543   1
  10  10   0 22852.2 426.036   1
  10 -10   0 24146.8 434.221   1
  10 -10  -2 26993.7 454.816   1
 -10   2 -10 26973.9 497.461   1
  10   2  10 25732.1 475.877   1
  -2  10 -10 25545.2 355.585   2
 -10  10  -2 26133.1 473.427   1
   2 -10 -10 26687.1 498.866   2
 -10  -2  10 26430.2 432.541   2
   4 -10 -10 83461.7 1013.53   1
 -10  10  -4 83227.1 1172.26   1
  -4  10 -10 84807.9 1049.79   2
  10  -4 -10 85622.8 1151.13   1
  10 -10  -4 82555.7 1118.24   1
 -10   4 -10 83322.8 1193.56   1
  -4  10 -10 82466.3 1206.80   1
  10   4  10 82061.7 1148.45   1
   4 -10 -10 83579.9 1192.76   2
   6 -10 -10 24821.2 495.375   2
 -10  10  -6 25366.0 492.615   1
 -10   6 -10 25674.6 502.946   1
  10 -10  -6 25434.0 430.185   1
   6 -10 -10 25358.3 377.425   1
  10  -6 -10 25360.8 449.268   1
  10   6  10 25211.8 450.799   1
  -6  10 -10 24523.7 503.201   1
   8  10  10 3741.28 121.213   1
 -10   8 -10 3802.60 174.346   1
   8 -10 -10 3856.94 122.269   1
  -8  10 -10 4203.47 183.353   1
  10 -10  -8 4116.52 137.656   1
  10  -8 -10 3904.60 140.078   1
 -10  10  -8 3854.45 171.712   1
  10 -10 -10 86466.8 1145.89   1
 -10  10 -10 85390.2 1270.97   1
   0   1 -11 7035.21 152.774   2
  -1  11   0 7109.14 156.456   1
   0  -1 -11 7109.99 168.643   2
  -1  11   0 7273.78 186.518   2
 -11   0   1 7108.63 202.698   1
 -11   0  -1 7009.63 200.818   1
   1 -11   0 7163.05 182.153   2
  -1 -11   0 7174.59 182.953   2
   3 -11   0 76826.9 1041.86   2
 -11   0  -3 76257.0 1064.98   1
 -11   0   3 74981.4 1070.18   1
  -3  11   0 78399.9 1042.49   2
   0   3 -11 79251.3 947.323   2
  -3  11   0 76157.5 990.673   1
  -3 -11   0 76908.8 1034.62   2
   0  -3 -11 77018.1 1028.76   2
 -11   0  -5 82763.4 1152.04   1
  -5 -11   0 82579.6 1119.51   2
   0   5 -11 81351.1 984.829   2
  -5  11   0 85359.5 1082.84   1
   0  -5 -11 83709.3 1132.87   2
  -5  11   0 84744.1 1131.64   2
  11   0   7 8754.25 235.532   1
   7 -11   0 8471.42 209.546   1
   0  -7 -11 8810.99 235.958   2
   7  11   0 8898.21 208.749   1
  -7  11   0 9002.94 232.880   2
 -11   0  -7 8704.29 238.758   1
   0  -7 -11 8686.02 167.206   1
  11   0  -7 8832.52 237.567   1
  -7  11   0 8969.22 209.368   1
  -9  11   0 2915.30 122.626   1
   0  -9 -11 2641.59 131.554   2
   0  -9 -11 2719.10 64.0859   1
   9 -11   0 3045.22 124.434   1
 -11   0  -9 2929.37 135.305   1
  -1 -10 -11 21402.3 443.172   2
  10  11  -1 20870.7 406.836   1
  10 -11   1 21177.0 410.545   1
 -11   1  10 21328.1 399.867   2
 -10  11   1 20858.4 400.234   1
 -11  -1 -10 21061.6 422.671   1
 -11  -1  -8 5533.34 186.439   1
  -1  -8 -11 5587.97 115.743   1
   8 -11   1 5934.51 178.273   1
  -8  11   1 5884.81 166.189   1
  -1  -8 -11 5685.79 191.037   2
  -6  11   1 9626.74 211.856   1
 -11  -1  -6 10406.6 257.673   1
  -1  -6 -11 10428.6 196.254   1
  -6  11   1 10413.1 250.757   2
  -1  -6 -11 10204.0 254.191   2
  -4  11   1 18255.6 308.011   1
 -11   1   4 19533.0 377.095   1
  -1  -4 -11 19225.5 357.880   2
  -4 -11  -1 18998.0 358.591   2
  -4  11   1 19959.9 364.345   2
 -11  -1  -4 18938.1 373.143   1
   1   4 -11 18835.2 252.951   2
  -2  11   1 47783.0 699.584   2
   2 -11   1 47582.8 682.488   2
  -1  -2 -11 46566.3 675.815   2
  -2  11   1 47625.1 626.258   1
 -11  -1  -2 46295.8 716.023   1
   1   2 -11 47304.9 613.496   2
 -11   1   2 48192.0 717.615   1
  -2 -11  -1 46975.8 692.439   2
   0 -11   1 39816.6 583.064   2
   0  11  -1 40117.6 590.906   2
   0  11   1 40129.7 608.377   2
   0 -11  -1 39141.9 598.459   2
  -1   0 -11 40041.5 565.235   2
 -11   1   0 39338.6 622.326   1
 -11  -1   0 39638.9 624.298   1
   1   0 -11 39744.2 553.776   2
 -11   1  -2 45597.3 700.749   1
  -2 -11   1 45877.1 657.549   2
   1  -2 -11 45201.8 651.260   2
  -2  11  -1 46447.9 643.223   1
 -11  -1   2 45917.5 704.069   1
  -2  11  -1 47643.3 669.518   2
   2 -11  -1 46417.8 680.335   2
  -1   2 -11 45305.6 614.250   2
  -4  11  -1 20205.2 359.430   2
  -4  11  -1 19440.4 336.087   1
  -4 -11   1 19996.5 351.549   2
   1  -4 -11 18972.0 356.514   2
   4 -11  -1 18984.8 366.713   2
 -11   1  -4 19891.9 384.220   1
  11  -1  -6 10486.4 254.986   1
 -11   1  -6 10020.5 257.397   1
   1  -6 -11 9902.91 247.631   2
  -6  11  -1 10203.7 242.064   2
  -6  11  -1 10139.1 227.197   1
   6  11   1 10030.9 211.731   1
  11   1   6 10313.1 252.926   1
 -11   1  -8 6194.88 198.692   1
   1  -8 -11 5994.30 196.398   2
  -8  11  -1 5975.23 185.366   2
   8 -11  -1 6246.00 173.325   1
   8  11   1 5854.55 166.152   1
  -8  11  -1 5752.40 175.124   1
  10  11   1 20378.1 386.828   1
 -11   1 -10 20259.0 422.823   1
  10 -11  -1 21046.7 394.541   1
 -10  11  -1 21004.7 404.485   1
   1 -10 -11 20197.3 428.200   2
  -9  11   2 2511.95 109.583   1
   9 -11   2 2701.71 123.115   1
 -11  -2  -9 2511.28 123.857   1
  -2  -9 -11 2622.03 66.8762   1
 -11   2   9 2624.91 118.083   2
  -2  -9 -11 2608.55 132.874   2
   9  11  -2 2481.20 116.784   1
  -2  -7 -11 41649.4 690.846   2
  -7  11   2 44601.5 631.642   1
  -2  -7 -11 44540.1 584.827   1
 -11  -2  -7 43428.9 688.286   1
  -5  11   2 12103.5 226.072   1
  -5  11   2 12633.1 281.593   2
  -5 -11  -2 11700.5 276.428   2
  -2  -5 -11 12197.7 230.335   1
  -2  -5 -11 12221.4 277.553   2
 -11  -2  -5 12126.9 279.213   1
  -3  11   2 2494.99 110.757   2
  -3 -11  -2 2512.85 110.410   2
 -11  -2  -3 2841.26 120.922   1
  -3  11   2 2481.11 76.2544   1
  -2  -3 -11 2441.61 105.969   2
 -11   2   3 2509.82 116.187   1
  -2  -3 -11 2399.36 97.0042   1
   2   3 -11 2412.59 64.0470   2
  -1 -11  -2 25691.7 441.412   2
 -11   2   1 25471.0 452.070   1
   2   1 -11 26034.9 375.515   2
  -1  11   2 25658.0 356.496   1
   1 -11   2 25101.0 410.029   2
 -11  -2  -1 25594.6 452.063   1
  -1  11   2 26734.6 449.170   2
 -11  -2   1 26880.3 469.122   1
 -11   2  -1 26669.8 467.312   1
   2  -1 -11 26781.2 412.755   2
  -1  11  -2 26585.7 425.591   2
  -1 -11   2 27212.7 422.084   2
   1 -11  -2 26365.7 452.638   2
   3 -11  -2 2307.95 106.813   2
  -3  11  -2 2505.57 100.078   2
   3  11   2 2478.04 76.5268   1
  -3 -11   2 2487.53 96.9442   2
 -11   2  -3 2501.16 120.941   1
   2  -3 -11 2500.36 102.674   2
  -3  11  -2 2512.36 100.599   1
   2  -5 -11 10808.7 252.107   2
  -5 -11   2 10980.8 236.859   2
  11   2   5 11312.3 260.714   1
 -11   2  -5 11217.6 271.962   1
  11  -2  -5 11227.9 263.147   1
  -5  11  -2 10896.9 239.169   1
  -5  11  -2 11141.8 246.855   2
   5  11   2 10900.7 209.269   1
   7 -11  -2 42385.8 612.617   1
   2  -7 -11 42031.6 667.231   2
  11   2   7 42744.2 665.005   1
   7  11   2 41202.1 604.926   1
  11  -2  -7 42591.4 667.823   1
  -7  11  -2 42919.0 650.676   2
 -11   2  -7 42237.8 678.471   1
  -7  11  -2 41858.5 641.139   1
   9 -11  -2 2816.24 114.001   1
  -2   9 -11 2693.27 64.1019   2
  -9  11  -2 2965.77 127.571   1
   2  -9 -11 2560.13 68.5494   1
 -11   2  -9 2784.77 135.981   1
   2  -9 -11 2641.83 132.653   2
 -10  11   3 19426.6 366.682   1
  -3 -10 -11 19103.4 418.982   2
  -3 -10 -11 18892.2 262.359   1
 -11  -3 -10 18597.8 386.815   1
 -11   3   8 91697.2 1264.86   2
  -8  11   3 92548.0 1209.00   1
  -3  -8 -11 91379.2 1292.29   2
  -3  -8 -11 95594.4 1147.39   1
 -11  -3  -8 92805.0 1268.27   1
  -3  -6 -11 25699.8 383.883   1
  -3   6  11 24577.5 451.283   2
 -11  -3  -6 25508.1 453.377   1
  -6  11   3 24788.8 390.202   1
  -6  11   3 24855.1 456.750   2
  -3  -6 -11 24711.8 460.581   2
 -11  -3  -4 6439.16 188.802   1
  -4 -11  -3 6193.79 188.809   2
  -4  11   3 6185.27 132.886   1
  -4  11   3 6493.46 191.388   2
  -3  -4 -11 6264.42 159.105   1
 -11   3   4 6503.67 191.400   1
 -11  -3  -2 4973.80 165.040   1
  -2 -11  -3 5141.53 165.062   2
  -3   2  11 5096.77 146.462   2
  -2  11   3 5462.19 170.846   2
  -3  -2 -11 4963.85 150.708   1
  -2  11   3 5239.04 102.070   1
 -11   3   2 5052.36 165.943   1
   3   0 -11 88134.4 1111.26   2
   0 -11  -3 85828.2 1180.63   2
   0  11   3 88692.3 1051.93   1
   0 -11   3 87366.7 1124.21   2
  -3   0 -11 88556.3 1178.09   1
 -11  -3   0 88677.1 1195.03   1
 -11   3   0 88517.8 1193.90   1
   0  11  -3 90232.8 1133.58   2
   2 -11  -3 5176.26 165.585   2
  11  -3  -2 5388.32 167.898   1
   3  -2 -11 4995.64 142.550   2
  -2  11  -3 5344.37 144.436   2
 -11  -3   2 5167.39 173.517   1
   2  11   3 4954.16 100.369   1
  -2  11  -3 5102.75 151.940   1
 -11   3  -2 5044.92 169.596   1
  -2 -11   3 5217.75 136.511   2
 -11   3  -4 6230.19 193.044   1
  -4  11  -3 6390.56 167.451   2
   4  11   3 6184.41 129.255   1
  -4  11  -3 6259.94 174.259   1
  -4 -11   3 6470.42 158.314   2
  11  -3  -4 6618.61 187.607   1
   4 -11  -3 6452.46 190.810   2
   3  -4 -11 6442.74 174.967   2
   6  11   3 25472.6 393.352   1
  -6  11  -3 26321.4 439.993   2
   3  -6 -11 25975.7 457.044   2
   6 -11  -3 25987.9 401.618   1
  -6  11  -3 25455.3 443.182   1
 -11   3  -6 25263.0 471.730   1
  11  -3  -6 26474.2 461.325   1
  11   3   6 25610.0 453.839   1
  -8  11  -3 90065.2 1254.50   1
   3  -8 -11 92539.6 1277.51   2
   8 -11  -3 94306.4 1209.13   1
   3  -8 -11 94897.4 1148.75   1
   8  11   3 91946.4 1201.72   1
  11   3   8 92614.0 1260.22   1
  -8  11  -3 93477.6 1253.32   2
 -11   3  -8 91904.0 1291.15   1
  11  -3  -8 94473.3 1266.71   1
   3 -10 -11 19265.8 269.470   1
  10 -11  -3 19568.3 367.288   1
 -11   3 -10 19231.9 414.604   1
   3 -10 -11 18942.6 412.319   2
 -10  11  -3 19101.4 396.025   1
  -3  10 -11 19695.6 288.107   2
  -4  -9 -11 41923.2 551.384   1
 -11  -4  -9 40549.1 662.560   1
  -4  -9 -11 40306.1 693.296   2
  -9  11   4 41202.2 618.268   1
  -4  -7 -11 22776.8 351.647   1
 -11  -4  -7 22859.4 425.584   1
  -7  11   4 23339.1 369.984   1
  -4  -7 -11 21892.7 442.086   2
  -4   7  11 21971.0 428.430   2
  -5  11   4 33450.5 475.561   1
  -5 -11  -4 35137.7 583.374   2
  -4  -5 -11 33955.1 506.550   1
 -11   4   5 34915.4 566.645   1
 -11  -4  -5 35422.0 564.544   1
 -11   4   3 3636.21 139.018   1
 -11  -4  -3 3789.95 142.766   1
  -4   3  11 3919.09 132.172   2
  -4  -3 -11 3727.97 124.807   1
  -3  11   4 3595.10 82.4706   1
  -3 -11  -4 4036.14 149.320   2
   1 -11   4 21547.2 348.663   2
  -1 -11  -4 21897.1 404.937   2
  -4   1  11 21090.3 356.396   2
 -11   4   1 21773.4 404.458   1
  -4  -1 -11 21376.3 385.163   1
 -11  -4  -1 21197.1 400.313   1
   1 -11  -4 20552.3 395.222   2
  -4   1 -11 20793.8 392.270   1
  -4  -1  11 20474.0 328.099   2
 -11  -4   1 21020.7 401.990   1
   4  -1 -11 20731.1 347.706   2
  11  -4  -1 21637.2 392.323   1
  -1  11  -4 21103.6 344.278   2
  -1 -11   4 22013.7 337.141   2
 -11   4  -1 21248.3 402.029   1
  -3  11  -4 3786.45 119.825   2
  -3 -11   4 3878.00 110.715   2
   3  11   4 3908.71 82.2751   1
 -11   4  -3 3784.22 147.164   1
  11  -4  -3 4014.49 143.179   1
  -4   3 -11 3678.98 146.455   1
   3 -11  -4 3756.81 142.779   2
   4  -3 -11 3750.99 128.600   2
  -3  11  -4 3748.48 135.771   1
   4  -5 -11 33348.3 539.751   2
 -11   4  -5 33092.4 564.229   1
   5  11   4 33771.8 458.390   1
  11  -4  -5 34024.3 549.081   1
  -5  11  -4 34510.9 518.120   2
   5 -11  -4 32776.6 464.156   1
  11   4   5 29808.8 526.340   1
  -5 -11   4 33878.0 493.605   2
  -5  11  -4 32704.1 541.224   1
  -4   5 -11 32843.9 574.984   1
   5 -11  -4 33232.5 565.918   2
  -7  11  -4 23660.1 416.009   2
 -11   4  -7 23556.6 454.447   1
  11  -4  -7 23756.1 431.604   1
   7  11   4 22999.2 372.395   1
  -4   7 -11 23458.5 468.334   1
  11   4   7 23610.2 427.027   1
  -7  11  -4 23013.6 430.100   1
   4  -7 -11 23501.2 441.856   2
   4  -7 -11 23427.9 362.737   1
   7 -11  -4 23443.2 375.458   1
   9 -11  -4 41290.2 615.090   1
  -9  11  -4 41356.2 671.757   1
  -4   9 -11 40251.5 704.187   1
   9  11   4 40651.4 612.694   1
  11   4   9 40718.5 657.262   1
   4  -9 -11 43431.6 555.851   1
   4  -9 -11 40455.8 683.578   2
  11  -4  -9 40362.9 657.804   1
 -11   4  -9 40209.7 690.570   1
  -5 -10 -11 65.1348 17.8100   1
  -5 -10 -11 16.8219 32.2214   2
 -11  -5 -10 9.37658 36.1841   1
 -10  11   5 100.357 32.6689   1
  -5  -8 -11 22172.8 340.959   1
  -8  11   5 20590.0 359.628   1
 -11  -5  -8 21013.0 404.505   1
 -11  -5  -6 19842.0 385.142   1
  -5  -6 -11 19832.1 337.474   1
  -5   6  11 20548.6 398.013   2
  -6  11   5 20972.9 321.801   1
 -11   5   6 19739.9 389.808   1
  -5  -4 -11 25968.7 427.322   1
  -4  11   5 26955.9 361.502   1
 -11   5   4 26430.1 466.774   1
  -4 -11  -5 26462.5 484.042   2
 -11  -5  -4 26307.8 463.851   1
 -11   5   2 2555.81 118.466   1
  11   5  -2 2549.35 117.670   1
  11  -5   2 2169.93 108.435   1
  -2 -11  -5 2302.96 114.919   2
 -11  -5  -2 2397.36 112.447   1
  -5   2  11 2253.76 95.9076   2
  -5  -2 -11 2274.82 101.374   1
  11  -5   0 137965. 1730.85   1
 -11   5   0 134475. 1733.01   1
  -5   0 -11 134105. 1719.62   1
 -11  -5   0 133944. 1734.24   1
  -5   0  11 134551. 1657.14   2
   0  11  -5 135219. 1643.62   2
   0 -11  -5 134775. 1742.81   2
   0 -11   5 135034. 1640.27   2
  11   5   0 134829. 1726.74   1
  -2 -11   5 2170.05 74.7151   2
 -11   5  -2 2136.17 110.868   1
   5  -2 -11 2077.03 91.3958   2
  -2  11  -5 1968.91 79.7673   2
  11  -5  -2 2089.22 102.239   1
   2 -11  -5 2026.66 106.976   2
  -5  -2  11 2098.88 72.6304   2
  -5   2 -11 1975.61 105.769   1
 -11   5  -4 26651.3 483.624   1
  -4  11  -5 26623.0 469.534   1
  -4 -11   5 27479.1 400.643   2
  11  -5  -4 26987.6 464.961   1
   5  -4 -11 26880.4 455.606   2
  -5   4 -11 26434.4 489.309   1
  -5  -4  11 26229.6 360.975   2
  -4  11  -5 26557.5 424.312   2
   4 -11  -5 26831.0 485.791   2
   4  11   5 26870.8 357.282   1
  11   5   6 19420.2 375.555   1
  -6  11  -5 19690.0 389.372   1
   6 -11  -5 20773.5 315.934   1
  -6  11  -5 20026.0 357.745   2
  -5   6 -11 19609.1 414.593   1
   6  11   5 19538.4 306.514   1
   5  -6 -11 19342.4 334.924   1
  11  -5  -6 19596.6 378.246   1
 -11   5  -6 18954.1 399.600   1
   6 -11  -5 19729.1 402.500   2
   5  -6 -11 19351.0 383.997   2
 -11   5  -8 21362.4 439.893   1
  -8  11  -5 21784.6 401.890   2
  -8  11  -5 21362.9 424.503   1
  11   5   8 21665.7 407.363   1
   8 -11  -5 22301.7 365.259   1
   5  -8 -11 22146.2 434.478   2
  -5   8 -11 21199.5 451.239   1
   8  11   5 21545.1 360.505   1
   5  -8 -11 21759.1 344.984   1
  11  -5  -8 22270.0 411.895   1
   5 -10 -11 55.5659 18.1524   1
  -5  10 -11-16.4307 39.7511   1
 -11   5 -10 26.1736 44.5138   1
 -10  11  -5 57.0294 38.2091   1
  10 -11  -5 1.53594 26.3302   1
  11   5  10 37.3647 27.7437   1
   5 -10 -11 40.4327 37.2676   2
  -6  -9 -11 3075.09 98.0559   1
 -11  -6  -9 3057.97 130.620   1
  -9  11   6 2744.60 108.628   1
 -11  -6  -7 21905.3 411.493   1
  -7  11   6 22101.6 354.104   1
  -6  -7 -11 22435.4 365.554   1
 -11   6   5 25296.0 446.259   1
  -6   5  11 24555.5 447.552   2
  -5 -11  -6 24612.7 475.109   2
 -11  -6  -5 24862.6 441.719   1
  -6  -5 -11 24554.9 407.258   1
  -6  -3 -11 28824.1 469.360   1
  11  -6   3 28553.7 501.456   1
  -3 -11  -6 28084.1 511.883   2
 -11  -6  -3 28188.7 487.098   1
  11   6  -3 28537.9 502.383   1
 -11   6   3 28561.5 490.448   1
 -11   6   1 14749.3 317.129   1
  -6   1  11 14350.6 281.871   2
  -1 -11  -6 14829.1 330.894   2
  11   6  -1 15602.1 322.552   1
  11  -6   1 15212.9 319.638   1
 -11  -6  -1 14596.9 315.206   1
  -6  -1 -11 14767.9 308.882   1
  11  -6  -1 13636.0 297.768   1
 -11   6  -1 14208.6 310.792   1
  -6   1 -11 14366.1 309.693   1
  -1 -11   6 14438.6 232.876   2
   1 -11  -6 14021.8 317.278   2
  11   6   1 13224.5 298.058   1
  -6  -1  11 14084.4 253.842   2
  -1  11  -6 13775.5 243.150   2
  -3  11  -6 26570.1 420.895   2
  -3  11  -6 27211.3 488.104   1
  -6   3 -11 28622.5 502.891   1
   3 -11  -6 27572.7 498.428   2
  -3 -11   6 28201.5 393.571   2
 -11   6  -3 27180.9 494.858   1
  -6  -3  11 27746.6 397.169   2
  11  -6  -3 28477.2 476.755   1
   5  11   6 25117.2 351.767   1
  -5 -11   6 25780.7 377.521   2
  11  -6  -5 25632.4 448.707   1
  -5  11  -6 25019.5 468.460   1
   5 -11  -6 25556.4 357.672   1
  -6  -5  11 25304.0 342.171   2
   6  -5 -11 25321.7 418.214   1
   6  -5 -11 24046.8 447.911   2
 -11   6  -5 25560.3 475.520   1
   5 -11  -6 24952.1 475.261   2
  -5  11  -6 24637.4 407.745   2
  -6   5 -11 25615.3 483.580   1
   6  -7 -11 23729.4 452.827   2
  11   6   7 23235.7 424.439   1
  -6   7 -11 24039.7 477.832   1
 -11   6  -7 23592.4 465.862   1
   7 -11  -6 24074.0 370.283   1
   6  -7 -11 23514.1 385.841   1
   7  11   6 23478.0 364.404   1
  -7  11  -6 23686.7 413.523   2
  -7  11  -6 23786.8 454.451   1
  11  -6  -7 24007.4 433.421   1
  11  -6  -9 2843.52 124.058   1
  -6   9 -11 2894.06 150.896   1
   9 -11  -6 2921.79 108.839   1
  -9  11  -6 2668.43 136.365   1
  11   6   9 2802.06 122.556   1
   6  -9 -11 2717.04 94.2250   1
   9  11   6 2846.57 105.455   1
 -11   6  -9 2635.77 142.112   1
   6  -9 -11 2748.28 139.288   2
  -7 -10 -11 7196.57 165.343   1
 -10  11   7 7065.14 190.639   1
 -11  -7 -10 6617.51 202.132   1
 -11  -7  -8 23376.8 427.754   1
  -7  -8 -11 23254.9 388.072   1
 -11  -7  -6 26177.5 466.928   1
 -11   7   6 26968.6 474.160   1
  -7  -6 -11 27689.6 441.749   1
  -7   4  11 49825.4 738.899   2
  -7  -4 -11 48032.5 711.885   1
  -4 -11  -7 48742.0 777.833   2
 -11   7   4 50308.0 742.553   1
 -11  -7  -4 48383.1 734.705   1
  11   7  -2 14469.4 318.158   1
 -11   7   2 14234.3 311.303   1
 -11  -7  -2 14661.9 310.799   1
  -2 -11  -7 14345.4 332.017   2
  11  -7   2 14347.3 317.522   1
  -7  -2 -11 14070.2 299.359   1
  11   7   0 1725.67 95.8607   1
  -7   0  11 1630.50 77.6495   2
  -7   0 -11 1628.74 94.7509   1
 -11   7   0 1643.90 97.2234   1
  11  -7   0 1642.83 92.4803   1
   0 -11  -7 1559.15 99.0099   2
  -2  11  -7 14729.3 250.627   2
  11  -7  -2 14669.4 309.753   1
  11   7   2 14069.3 307.342   1
  -7  -2  11 14481.2 257.798   2
   2 -11  -7 14735.8 333.641   2
  -7   2 -11 14189.5 323.221   1
  -2 -11   7 15256.3 228.322   2
 -11   7  -2 14130.1 321.031   1
  -7   4 -11 49052.0 782.499   1
  -7  -4  11 50378.7 652.448   2
   4 -11  -7 49273.5 613.611   1
  -4  11  -7 49836.2 685.119   2
   4 -11  -7 48706.1 774.856   2
  -4 -11   7 50452.0 639.361   2
   7  -4 -11 50809.6 730.264   1
   4  11   7 50743.7 608.501   1
 -11   7  -4 47563.9 765.179   1
  11  -7  -4 49664.6 737.653   1
  -4  11  -7 48613.6 774.541   1
  -7   6 -11 25232.3 493.241   1
  11  -7  -6 25406.0 444.216   1
  -6 -11   7 25552.6 371.818   2
  -6  11  -7 25493.8 416.738   2
   6 -11  -7 24641.8 365.284   1
  -6  11  -7 25296.5 478.306   1
   6  11   7 24907.4 361.830   1
   6 -11  -7 25047.0 487.773   2
 -11   7  -6 25627.3 485.542   1
  -7  -6  11 25598.1 344.537   2
   7  -6 -11 25815.3 421.173   1
  -7  -8  11 22973.6 299.988   2
  -8  11  -7 23939.9 420.104   2
  11  -7  -8 23730.8 431.239   1
   7  -8 -11 23974.0 389.792   1
 -11   7  -8 23210.2 474.202   1
   8 -11  -7 23295.8 379.060   1
  11   7   8 23359.2 423.574   1
   7  -8 -11 23469.7 463.751   2
  -8  11  -7 23548.2 466.256   1
   8  11   7 23366.8 373.170   1
  -7   8 -11 23918.7 486.430   1
  11  -7 -10 7532.75 213.912   1
  11   7  10 7685.77 216.318   1
   7 -10 -11 7823.13 175.584   1
  -7  10 -11 7530.98 255.316   1
 -11   7 -10 7658.23 252.959   1
 -10  11  -7 7588.48 244.956   1
  10 -11  -7 7486.24 193.708   1
   7 -10 -11 7471.33 247.463   2
  -9 -11  -8 6523.03 172.671   1
 -11  -8  -9 6694.19 197.706   1
  -8  -9 -11 6711.24 172.350   1
  -8  -7 -11 37987.7 578.428   1
 -11  -8  -7 37137.7 597.469   1
 -11  -8  -5 5185.47 167.916   1
 -11   8   5 5531.86 175.572   1
  -5 -11  -8 5420.01 199.052   2
  -8  -5 -11 5465.32 164.546   1
  -8  -3 -11 36129.1 567.996   1
 -11   8   3 34694.6 573.634   1
  -8   3  11 32932.5 557.862   2
  -3 -11  -8 37034.0 620.769   2
 -11  -8  -3 35340.0 572.556   1
  11   8  -1 41948.7 653.957   1
  -1 -11  -8 40457.0 675.654   2
 -11   8   1 39920.2 646.921   1
  -8  -1 -11 41097.3 645.433   1
  11  -8   1 40525.1 650.873   1
   1 -11  -8 40630.3 672.582   2
  -8   1 -11 40084.7 655.912   1
  11  -8  -1 41488.9 640.580   1
 -11   8  -1 40568.8 653.208   1
  -8  -1  11 40608.2 590.955   2
  11   8   1 39755.1 640.517   1
  -1  11  -8 41110.7 539.212   2
  -8  -3  11 34064.9 488.485   2
  11   8   3 32448.3 547.676   1
 -11   8  -3 33632.8 575.522   1
  -8   3 -11 33352.9 582.614   1
  -3  11  -8 33727.8 478.356   2
   8  -3 -11 34144.3 551.080   1
  11  -8  -3 33491.0 547.998   1
   3 -11  -8 33798.7 588.746   2
  -5  11  -8 6980.22 223.299   1
   5  11   8 7151.62 131.838   1
  -5 -11   8 7172.28 131.187   2
   5 -11  -8 6924.37 132.239   1
  -5  11  -8 6827.41 168.789   2
 -11   8  -5 7074.61 223.081   1
  -8   5 -11 6654.78 222.580   1
   5 -11  -8 6993.59 225.974   2
  -8  -5  11 7083.20 148.464   2
  11  -8  -5 7350.79 201.281   1
   8  -5 -11 7578.65 197.784   1
  -7  11  -8 37796.6 574.974   2
  -7  11  -8 36213.4 645.480   1
  -7 -11   8 38735.2 515.307   2
   8  -7 -11 38415.2 577.097   1
   7 -11  -8 38033.3 529.240   1
  11   8   7 35356.6 584.119   1
   8   7  11 36300.2 575.601   1
  -8  -7  11 37042.1 495.364   2
  11  -8  -7 37512.3 593.468   1
   7  11   8 37208.0 524.079   1
  -8   7 -11 37572.6 662.120   1
 -11   8  -7 37417.7 653.024   1
 -11   8  -9 6763.97 239.084   1
   9  11   8 7037.38 175.529   1
  11  -8  -9 6925.94 199.860   1
  -8  -9  11 7156.51 125.050   2
  -9  11  -8 7029.37 236.142   1
  -8   9 -11 6975.88 241.316   1
  11   8   9 6796.58 197.579   1
   9 -11  -8 6855.76 175.762   1
   8  -9 -11 7002.96 179.126   1
 -10 -11  -9 3695.88 130.582   1
 -11  -9 -10 3629.41 142.032   1
  -9 -10 -11 3612.93 126.321   1
  -9  -8 -11 10883.6 248.748   1
 -11  -9  -8 10821.4 257.532   1
  -8 -11  -9 11245.7 222.560   1
  -6 -11  -9 17079.7 400.301   2
 -11   9   6 17695.6 350.212   1
  -9  -6 -11 17534.0 343.817   1
 -11  -9  -6 17136.2 345.278   1
  -9  -4 -11 34003.8 554.542   1
  -9   4  11 33054.7 565.351   2
  -4 -11  -9 34085.1 609.136   2
 -11  -9  -4 34197.0 555.736   1
 -11   9   4 33605.9 557.229   1
  -2 -11  -9 5044.96 189.646   2
 -11   9   2 5084.93 169.654   1
  -9   2  11 4209.46 148.583   2
  -9  -2 -11 4789.50 166.487   1
  11   9   0 9170.31 237.185   1
 -11   9   0 8987.59 241.277   1
  -9   0 -11 8702.59 243.226   1
   0 -11  -9 8628.63 252.130   2
  11  -9   0 8819.82 234.148   1
   2 -11  -9 5035.65 188.007   2
  -9   2 -11 4806.93 178.903   1
   9   2  11 4750.23 170.668   1
  -2  11  -9 4995.61 112.959   2
  -9  -2  11 4947.50 141.011   2
  11  -9  -2 5063.25 166.032   1
 -11   9  -2 5272.66 181.235   1
  11   9   2 4810.88 163.245   1
   9  -2 -11 5118.16 173.301   1
   9  -4 -11 33319.6 547.662   1
  -9  -4  11 33335.8 484.423   2
   4 -11  -9 33291.2 591.940   2
   9   4  11 32745.6 550.220   1
  -4  11  -9 32920.0 592.469   1
  11   9   4 31186.6 530.626   1
 -11   9  -4 32044.8 573.068   1
  -4  11  -9 33061.8 476.337   2
  11  -9  -4 33344.1 541.966   1
  -9   4 -11 33274.1 591.948   1
  -9   6 -11 16999.7 395.087   1
   6  11   9 17214.2 273.183   1
  11  -9  -6 17727.2 344.823   1
  -6 -11   9 17481.8 248.241   2
 -11   9  -6 17365.4 387.752   1
  -9  -6  11 17738.7 285.590   2
  -6  11  -9 16619.9 388.850   1
   6 -11  -9 17263.6 273.137   1
   6 -11  -9 17132.9 392.526   2
  -6  11  -9 17008.6 315.437   2
   9  -6 -11 17316.9 343.130   1
   8  11   9 10807.5 218.806   1
  11   9   8 10590.4 251.849   1
 -11   9  -8 10518.7 302.586   1
  11  -9  -8 10548.6 252.745   1
   8 -11  -9 10911.5 219.924   1
  -9   8 -11 11165.8 311.847   1
  -8  11  -9 10936.4 305.140   1
   9  -8 -11 10902.2 246.164   1
   9 -10 -11 3100.53 117.125   1
  11   9  10 3227.62 132.062   1
 -11   9 -10 3243.28 166.985   1
 -10  11  -9 3216.59 163.843   1
  -9  10 -11 3233.99 168.379   1
  10 -11  -9 3210.95 121.408   1
  11  -9 -10 3449.65 135.308   1
   9  10  11 3187.95 119.802   1
 -10  -9 -11 5487.51 171.141   1
 -11 -10  -9 5238.10 169.167   1
  -9 -11 -10 5442.16 153.698   1
 -11 -10  -7 5891.17 177.769   1
 -11  10   7 5905.44 182.522   1
  -7 -11 -10 6054.38 141.431   1
 -10  -7 -11 5884.54 182.510   1
 -10  -5 -11 7449.16 214.933   1
 -11  10   5 7804.45 212.170   1
  -5 -11 -10 7864.02 255.742   2
  -5 -11 -10 7647.10 138.792   1
  -3 -11 -10 7364.00 242.681   2
 -10  -3 -11 7642.98 218.286   1
 -11  10   3 7222.21 208.232   1
 -10   3  11 7229.69 210.271   2
 -10   1  11 2694.74 116.233   2
 -10  -1 -11 2820.24 133.101   1
 -11  10   1 2709.10 125.183   1
  -1 -11 -10 2774.43 141.847   2
   1 -11 -10 2708.84 139.431   2
 -11  10  -1 2617.49 128.735   1
  11  10   1 2705.61 122.045   1
 -10   1 -11 2781.35 135.774   1
  11 -10  -1 3019.75 128.518   1
  -3  11 -10 7643.55 152.082   2
  11  10   3 7242.65 205.396   1
 -10  -3  11 7392.66 185.045   2
 -11  10  -3 7248.14 222.899   1
  11 -10  -3 7541.93 207.447   1
 -10   3 -11 7632.13 236.978   1
   3 -11 -10 7635.74 238.413   2
   5 -11 -10 7633.78 142.298   1
  -5  11 -10 7791.49 252.161   1
  -5  11 -10 8163.94 179.141   2
   5 -11 -10 7803.16 248.254   2
  11 -10  -5 7887.82 210.871   1
 -10   5 -11 7509.15 245.123   1
 -10  -5  11 7818.05 179.635   2
  10   5  11 7686.87 220.296   1
 -11  10  -5 7909.46 244.678   1
  10  -5 -11 7916.88 219.964   1
  10  -7 -11 5224.02 170.405   1
  -7  11 -10 5393.23 209.035   1
 -11  10  -7 5365.45 205.514   1
  -7 -11  10 5214.74 97.0181   2
 -10   7 -11 5259.99 207.627   1
   7 -11 -10 5327.09 133.035   1
  11 -10  -7 5354.49 167.371   1
   7 -11 -10 5284.88 206.355   2
  10   7  11 5032.56 169.973   1
  10  -9 -11 5357.00 165.097   1
   9  11  10 4900.08 145.931   1
 -10   9 -11 5225.37 213.539   1
  11  10   9 4787.09 159.431   1
 -11  10  -9 4724.65 202.685   1
  11 -10  -9 5034.04 164.178   1
  -9  11 -10 5164.07 209.903   1
   9 -11 -10 5080.70 146.106   1
 -10 -11 -11 1209.92 74.6405   1
 -11 -11 -10 1314.99 83.6076   1
 -11 -10 -11 1258.31 83.6463   1
 -11  -8 -11 24853.7 455.929   1
 -11 -11  -8 24911.4 440.241   1
  -8 -11 -11 25027.2 398.386   1
  -6 -11 -11 3232.20 91.5231   1
 -11  -6 -11 3128.49 136.266   1
  -6 -11 -11 3114.41 163.587   2
 -11  11   6 3143.33 129.567   1
  -4 -11 -11 2750.00 148.961   2
  -4 -11 -11 2877.31 64.4408   1
 -11  -4 -11 2952.17 136.050   1
 -11  11   4 2742.61 124.245   1
  -2 -11 -11 28763.8 549.915   2
 -11  11   2 28043.5 499.125   1
 -11  -2 -11 28321.2 517.864   1
   0 -11 -11 51434.1 834.493   2
 -11   0  11 51139.6 761.056   2
 -11   0 -11 51915.8 818.371   1
 -11  11   0 52081.2 792.211   1
  11 -11  -2 30070.9 508.737   1
   2 -11 -11 28455.1 550.947   2
 -11  11  -2 29276.9 527.457   1
 -11   2 -11 28837.2 544.985   1
  11  11   2 28729.4 502.860   1
  -2  11 -11 29274.5 386.423   2
  -4  11 -11 3277.33 94.7122   2
   4 -11 -11 3032.43 152.036   2
 -11  -4  11 3004.50 113.786   2
  11 -11  -4 3079.20 127.229   1
   4 -11 -11 3107.81 70.2923   1
 -11   4 -11 2809.12 149.702   1
  11  11   4 3054.48 125.802   1
  -4  11 -11 2990.71 156.835   1
 -11  11  -4 3046.61 147.107   1
   6 -11 -11 2608.51 81.0039   1
   6 -11 -11 2293.71 137.923   2
 -11   6 -11 2420.34 140.198   1
  -6  11 -11 2411.40 142.539   1
 -11  11  -6 2283.03 132.529   1
  11 -11  -6 2599.49 113.291   1
  -6  11 -11 2434.09 96.5727   2
  11  -8 -11 24975.4 448.708   1
  -8 -11  11 23926.9 315.125   2
  11 -11  -8 23800.7 427.500   1
  11   8  11 24503.0 449.161   1
 -11   8 -11 24788.2 520.977   1
   8 -11 -11 24788.7 392.157   1
 -11  11  -8 25432.7 516.267   1
  -8  11 -11 24046.8 517.705   1
 -11  11 -10 1175.31 104.680   1
  11  10  11 1162.08 78.7900   1
  11 -11 -10 1245.69 77.8173   1
 -10  11 -11 1277.10 110.669   1
  10 -11 -11 1313.88 76.8163   1
 -11  10 -11 1111.17 101.644   1
  11 -10 -11 1112.73 75.5776   1
   0   0 -12 60923.0 818.107   2
   0 -12   0 60830.7 858.378   2
   0  12   0 62424.2 865.902   2
 -12   0   0 61963.5 897.628   1
  -2 -12   0 188.156 35.7862   2
   2 -12   0 239.520 38.1042   2
 -12   0  -2 197.794 45.3828   1
   0  -2 -12 206.404 36.8068   2
 -12   0   2 185.089 45.1727   1
  -2  12   0 215.871 36.5871   2
   0   2 -12 186.297 25.4224   2
  -2  12   0 246.827 30.0872   1
   0   4 -12 412.295 26.1318   2
 -12   0   4 420.313 59.6017   1
  -4  12   0 454.831 49.1529   2
  -4 -12   0 439.816 49.7655   2
  -4  12   0 411.668 39.2662   1
   0  -4 -12 464.187 50.6425   2
 -12   0  -4 578.544 66.0543   1
   6  12   0 18875.5 340.358   1
  -6  12   0 18710.7 375.130   2
   0  -6 -12 19199.2 381.846   2
 -12   0  -6 19789.3 397.157   1
  -6  12   0 19178.6 341.116   1
   0  -8 -12 8972.19 251.620   2
  -8  12   0 8716.83 218.053   1
   8 -12   0 8813.03 222.644   1
 -12   0  -8 8601.61 248.045   1
   0  -8 -12 8787.36 167.824   1
 -12   0 -10 906.850 82.5243   1
 -10  12   0 894.222 72.9465   1
   0 -10 -12 898.722 84.0229   2
 -12   0  10 783.847 67.8168   2
   0 -10 -12 857.580 29.1773   1
  10 -12   0 967.327 74.1500   1
  10  12   0 805.483 67.6958   1
  -1 -11 -12 10411.1 298.033   2
 -11  12   1 10089.3 261.573   1
 -12  -1 -11 10255.6 281.337   1
   9 -12   1 525.469 56.4784   1
  -1  -9 -12 535.939 31.0754   1
  -9  12   1 491.893 53.7303   1
 -12   1   9 529.623 55.6526   2
 -12  -1  -9 476.241 62.2309   1
   9  12  -1 688.152 63.1746   1
  -1  -9 -12 531.055 67.5268   2
  -1  -7 -12 11591.6 218.291   1
  -1  -7 -12 12242.3 295.474   2
 -12  -1  -7 12422.2 299.892   1
  -7  12   1 12019.2 250.353   1
 -12  -1  -5 4383.58 163.150   1
  -5  12   1 4453.31 156.462   2
  -1  -5 -12 4186.08 152.496   2
  -5 -12  -1 4330.77 153.393   2
  -1  -5 -12 4394.94 128.733   1
  -5  12   1 4249.30 123.960   1
   1   3 -12 9020.64 157.819   2
  -3 -12  -1 9096.26 227.684   2
  -3  12   1 9068.49 228.100   2
   3 -12   1 8800.00 218.279   2
 -12  -1  -3 9125.31 241.802   1
 -12   1   3 9054.81 242.675   1
  -3  12   1 8846.71 181.629   1
  -1  -3 -12 9004.46 221.543   2
  -1  12   1 13981.1 293.763   2
   1   1 -12 13537.3 240.382   2
 -12  -1  -1 13508.4 307.172   1
   1 -12   1 13960.3 280.610   2
  -1  -1 -12 13589.2 268.117   2
 -12   1   1 13778.3 308.876   1
  -1  12   1 13504.5 236.898   1
  -1 -12  -1 14066.9 291.747   2
   1 -12  -1 16091.9 319.603   2
  -1 -12   1 15336.9 302.168   2
   1  -1 -12 15800.9 288.225   2
  -1  12  -1 16435.7 312.549   2
 -12   1  -1 15962.1 342.030   1
 -12  -1   1 15913.2 340.220   1
  -1   1 -12 15685.2 276.768   2
   3 -12  -1 8370.08 221.274   2
 -12  -1   3 8503.75 236.166   1
 -12   1  -3 8476.82 234.600   1
  -3  12  -1 8466.77 211.535   2
  -3  12  -1 8466.94 194.264   1
  -3 -12   1 8248.78 205.651   2
   1  -3 -12 8514.96 209.085   2
  -1   3 -12 8726.33 166.283   2
   5  12   1 4083.48 121.247   1
   1  -5 -12 4197.84 149.290   2
  -5  12  -1 3823.86 128.417   1
 -12   1  -5 4166.51 160.841   1
  -5  12  -1 4178.40 146.340   2
  -5 -12   1 4087.59 141.160   2
  -1   5 -12 4074.75 88.5474   2
  12   1   5 4158.96 154.498   1
  -7  12  -1 12424.8 287.569   2
   1  -7 -12 12666.4 300.504   2
  -7  12  -1 12517.3 269.287   1
 -12   1  -7 11800.9 297.821   1
   7  12   1 12789.7 259.028   1
   9 -12  -1 578.227 55.6093   1
   1  -9 -12 625.795 70.0356   2
  -9  12  -1 527.479 59.2815   1
 -12   1  -9 531.185 64.3233   1
   1  -9 -12 558.787 32.7894   1
 -12  -1  11 10060.5 245.261   2
   1 -11 -12 9627.22 284.641   2
  11  12   1 9366.81 246.803   1
 -12   1 -11 9750.16 279.903   1
 -11  12  -1 9606.05 260.837   1
 -10  12   2 19649.9 379.149   1
  -2 -10 -12 19262.5 429.683   2
  -2 -10 -12 19939.0 270.931   1
 -12  -2 -10 19339.1 413.063   1
  -8  12   2 19164.1 346.183   1
  -2  -8 -12 18103.7 394.171   2
  -2  -8 -12 18936.2 290.147   1
 -12  -2  -8 18631.4 392.092   1
   8  12  -2 17957.9 361.902   1
 -12  -2  -6 17164.4 361.894   1
  -2  -6 -12 17196.3 360.163   2
  -6  12   2 17074.4 302.388   1
  -2  -6 -12 16814.4 292.986   1
  -4  12   2 10164.7 251.208   2
  -4 -12  -2 9745.51 246.537   2
  -2  -4 -12 10044.3 245.738   2
  -2  -4 -12 9597.12 215.324   1
  -4  12   2 10267.1 192.325   1
 -12  -2  -4 9441.72 250.515   1
 -12   2   4 10072.4 257.012   1
   2   2 -12 5588.74 121.065   2
  -2  -2 -12 5574.73 162.538   2
   2 -12   2 5227.73 155.019   2
  -2 -12  -2 5192.46 169.130   2
 -12   2   2 5730.55 184.130   1
 -12  -2  -2 5445.98 180.414   1
  -2  12   2 5694.23 175.793   2
  -2  12   2 5235.19 118.935   1
   0  12  -2 1102.50 67.5442   2
   2   0 -12 1066.54 57.9961   2
   0 -12  -2 1173.49 78.4222   2
   0  12   2 1115.61 47.0207   1
 -12   2   0 1188.22 86.9700   1
 -12  -2   0 1037.56 82.2489   1
   0 -12   2 1196.72 67.9852   2
   2  -2 -12 5344.21 150.969   2
  -2  12  -2 5450.16 154.528   1
  -2 -12   2 5012.86 148.030   2
  -2  12  -2 5653.43 159.139   2
 -12  -2   2 5459.26 183.723   1
 -12   2  -2 5143.89 179.390   1
   2 -12  -2 5506.25 172.922   2
  12   2   2 5507.91 176.590   1
  -4 -12   2 8878.17 212.529   2
   4 -12  -2 8700.13 236.148   2
 -12   2  -4 9613.63 254.086   1
   2  -4 -12 9117.52 224.382   2
   4  12   2 9208.77 181.504   1
  -4  12  -2 9450.96 218.136   1
  -4  12  -2 9407.96 224.175   2
  12   2   4 9174.87 239.433   1
  12  -2  -4 9260.43 241.401   1
  -6  12  -2 17464.6 341.134   2
   2  -6 -12 16323.9 346.929   2
  -6 -12   2 16541.2 325.593   2
   6  12   2 16873.0 294.892   1
 -12   2  -6 17085.9 368.475   1
  -6  12  -2 16606.1 326.398   1
  -2   8 -12 17696.3 243.560   2
   8  12   2 17189.3 326.001   1
   8 -12  -2 17766.4 334.583   1
  -8  12  -2 18191.9 357.321   1
 -12   2  -8 17728.4 386.696   1
   2  -8 -12 17704.2 380.555   2
   2 -10 -12 19441.7 267.055   1
 -10  12  -2 18919.0 389.228   1
  10  12   2 18015.8 358.972   1
   2 -10 -12 19064.3 416.944   2
   2 -10 -12 19018.4 264.756   1
  10 -12  -2 19105.4 370.743   1
 -12   2 -10 18435.8 411.851   1
  -3 -11 -12 14821.5 371.026   2
 -12  -3 -11 15153.7 347.568   1
  -3 -11 -12 14125.9 191.416   1
 -11  12   3 15502.2 325.864   1
 -12  -3  -9 16149.0 358.942   1
  -3  -9 -12 16188.5 378.239   2
  -3  -9 -12 16211.3 255.843   1
  -9  12   3 16452.1 319.445   1
  -3  -7 -12 6635.47 153.481   1
  -7  12   3 6685.42 165.769   1
 -12  -3  -7 6236.00 203.592   1
  -3  -7 -12 6821.42 215.357   2
  -3   5  12 14914.6 321.310   2
  -5 -12  -3 15305.6 337.807   2
  -3  -5 -12 15633.3 333.919   2
  -5  12   3 15158.7 262.255   1
 -12  -3  -5 14828.2 331.104   1
 -12   3   5 15532.9 339.072   1
  -3  -5 -12 15487.2 283.683   1
  -3  12   3 17856.5 366.339   2
  -3  12   3 18730.2 273.002   1
  -3 -12  -3 17861.7 363.662   2
 -12  -3  -3 17868.3 366.064   1
 -12   3   3 18116.0 372.330   1
  -3   3  12 17939.0 340.445   2
  -3  -3 -12 17566.0 333.501   1
 -12   3   1 27539.1 493.161   1
   3   1 -12 26424.7 407.590   2
  -3  -1 -12 27281.8 470.119   1
  -1 -12  -3 27591.2 485.010   2
  -1  12   3 28823.2 494.294   2
 -12  -3  -1 27893.1 492.437   1
   1 -12   3 27564.4 442.062   2
  -1  12   3 28640.6 369.711   1
  -3   1 -12 26345.5 469.197   1
  12   3   1 27287.0 473.676   1
   3  -1 -12 25356.7 411.742   2
 -12   3  -1 26853.8 480.978   1
  -1 -12   3 26493.6 417.068   2
  -1  12  -3 26244.0 426.101   2
  12  -3  -1 26586.3 470.637   1
 -12  -3   1 25976.0 474.486   1
   1 -12  -3 26531.4 467.204   2
 -12   3  -3 18593.4 384.170   1
  -3  12  -3 19124.1 339.425   2
  -3 -12   3 18106.9 322.409   2
  12  -3  -3 18165.9 367.412   1
  -3  12  -3 18671.4 348.373   1
   3  -3 -12 18225.5 338.663   2
  12   3   3 18045.0 365.496   1
   3 -12  -3 18748.4 371.912   2
   3  12   3 18649.2 275.994   1
   5  12   3 15790.4 262.488   1
   3  -5 -12 15343.7 320.531   2
  -5  12  -3 15929.3 313.680   2
  -5 -12   3 15330.7 296.225   2
   5 -12  -3 16153.5 346.472   2
 -12   3  -5 15257.1 346.076   1
  12  -3  -5 15552.1 334.834   1
  12   3   5 15412.4 331.193   1
  -5  12  -3 15232.5 313.777   1
 -12   3  -7 6339.95 210.179   1
  -7  12  -3 6434.75 188.356   2
   7 -12  -3 6256.93 163.195   1
   3  -7 -12 6474.93 201.454   2
  -7  12  -3 6358.54 190.054   1
   7  12   3 6346.00 161.516   1
  -9  12  -3 14882.5 333.067   1
  -3   9 -12 15156.5 231.588   2
   9 -12  -3 14592.4 300.298   1
   3  -9 -12 14822.1 350.325   2
 -12   3  -9 15557.5 360.954   1
   3  -9 -12 15143.2 243.377   1
   3 -11 -12 15086.3 366.544   2
  -3  11 -12 15175.2 229.503   2
  11 -12  -3 14763.9 318.707   1
  11  12   3 14269.5 313.378   1
   3 -11 -12 14555.0 200.513   1
 -11  12  -3 14461.4 342.232   1
   3 -11 -12 14516.1 202.296   1
 -12   3 -11 14490.7 362.672   1
 -12  -4 -10 194.706 48.4303   1
  -4 -10 -12 184.782 23.4193   1
  -4 -10 -12 151.148 45.9802   2
 -10  12   4 168.779 36.9627   1
  -8  12   4 10830.1 227.979   1
 -12  -4  -8 10238.1 268.181   1
  -4  -8 -12 9951.67 281.031   2
  -4  -8 -12 10245.6 200.408   1
  -6  12   4 9957.16 200.835   1
  -6 -12  -4 10481.9 276.443   2
  -4   6  12 10186.6 258.605   2
  -4  -6 -12 10123.0 270.057   2
 -12  -4  -6 10352.7 262.005   1
  -4  -6 -12 10257.1 214.054   1
  -4 -12  -4 146430. 1916.13   2
  -4  12   4 151286. 1768.50   1
 -12  -4  -4 147309. 1903.51   1
  -4  -4 -12 148194. 1844.25   1
 -12   4   4 145378. 1907.11   1
  -2 -12  -4 14041.5 318.542   2
 -12   4   2 14449.8 322.069   1
  -4   2  12 14641.3 287.088   2
  -4  -2 -12 14267.8 296.835   1
 -12  -4  -2 14176.3 317.471   1
  -2  12   4 14503.8 321.891   2
  -2  12   4 14646.4 205.899   1
  -4   0 -12 30589.9 516.326   1
 -12  -4   0 29838.9 530.000   1
   4   0 -12 31127.1 460.054   2
  12   4   0 31436.2 529.757   1
   0 -12  -4 30869.2 530.076   2
  -4   0  12 31035.8 464.134   2
 -12   4   0 30515.0 533.984   1
  12  -4   0 30846.9 524.888   1
   0 -12   4 30299.1 461.924   2
  -2  12  -4 14046.4 275.639   2
  -2 -12   4 14803.9 265.351   2
 -12   4  -2 15131.9 331.188   1
  12   4   2 14436.8 316.857   1
   2 -12  -4 14383.4 319.968   2
  12  -4  -2 14662.5 316.211   1
  -4   2 -12 14370.2 324.922   1
   2  12   4 14599.2 204.234   1
   4  -2 -12 14686.1 283.732   2
  -4  12  -4 148582. 1835.18   2
   4  -4 -12 145430. 1855.63   2
  12   4   4 145885. 1881.20   1
   4  12   4 148388. 1749.63   1
  -4 -12   4 148323. 1808.15   2
 -12   4  -4 148404. 1911.17   1
   4 -12  -4 147361. 1902.51   2
  12  -4  -4 144860. 1883.94   1
  -4   4 -12 146148. 1915.62   1
  -4  12  -4 147858. 1868.95   1
   4  -6 -12 10251.1 259.018   2
   6 -12  -4 10646.2 206.937   1
  -6  12  -4 10617.8 243.195   2
  12   4   6 10098.0 257.452   1
  -4   6 -12 10354.2 285.798   1
  -6 -12   4 10445.8 227.875   2
   6  12   4 10905.2 203.500   1
 -12   4  -6 10818.9 281.147   1
  -6  12  -4 10272.3 255.950   1
  12  -4  -6 10022.8 258.174   1
 -12   4  -8 11114.4 293.247   1
   4  -8 -12 10238.3 275.969   2
   8  12   4 10959.0 227.964   1
  -8  12  -4 10375.9 266.495   1
   8 -12  -4 10843.0 231.510   1
   4  -8 -12 10614.9 207.897   1
  -8  12  -4 10981.2 263.164   2
  -4   8 -12 11065.3 302.915   1
 -10  12  -4 211.185 50.3362   1
   4 -10 -12 185.595 21.7588   1
 -12   4 -10 159.305 46.9328   1
  -4  10 -12 169.626 51.6324   1
  -4  10 -12 172.587 24.0024   2
   4 -10 -12 242.707 50.0626   2
  10 -12  -4 227.227 37.8386   1
  -5 -11 -12 25413.6 538.411   2
  -5 -11 -12 26735.0 370.831   1
 -12  -5 -11 26713.5 500.094   1
 -11  12   5 26134.8 465.202   1
  -5  -9 -12 6290.91 224.442   2
  -9  12   5 6173.21 169.020   1
 -12  -5  -9 5894.53 196.873   1
  -5  -9 -12 6242.35 144.651   1
 -12  -5  -7 14580.0 328.796   1
  -5  -7 -12 15196.0 276.106   1
  -7  12   5 14993.7 270.100   1
  -5  -5 -12 6085.62 163.615   1
 -12  -5  -5 6131.37 192.538   1
  -5   5  12 6019.97 187.895   2
  -5 -12  -5 5966.17 203.829   2
 -12   5   5 5938.88 193.074   1
  -5  12   5 6280.78 130.854   1
 -12  -5  -3 4461.35 162.592   1
  -3 -12  -5 4710.14 172.866   2
 -12   5   3 4630.58 166.140   1
  -3  12   5 4586.53 84.2418   1
  -5  -3 -12 4542.36 146.621   1
  12  -5   1 4548.91 161.663   1
  -5  -1 -12 4403.36 152.769   1
 -12   5   1 4675.54 167.006   1
  12   5  -1 4299.79 158.406   1
  -5   1  12 4342.49 134.145   2
 -12  -5  -1 4315.94 161.231   1
  -1 -12  -5 4314.62 163.161   2
  -1 -12   5 4495.81 121.116   2
  12   5   1 4336.02 159.811   1
  -1  12  -5 4422.30 126.207   2
  -5  -1  12 4457.89 121.966   2
   1 -12  -5 4587.47 166.618   2
 -12   5  -1 4361.69 162.873   1
  -5   1 -12 4464.18 160.853   1
  12  -5  -1 4262.86 156.224   1
  -3 -12   5 4981.46 128.286   2
  -5   3 -12 4907.75 178.313   1
  -3  12  -5 5203.25 170.534   1
  12  -5  -3 5190.71 170.002   1
 -12   5  -3 5112.82 180.909   1
  12   5   3 5093.99 168.555   1
   3 -12  -5 4455.78 170.043   2
  -5  -3  12 4929.45 113.132   2
  -3  12  -5 4906.61 141.088   2
   3  12   5 4876.11 84.6210   1
   5  -3 -12 4920.88 154.471   2
   5 -12  -5 6330.33 209.472   2
  -5  12  -5 6562.73 176.441   2
  -5 -12   5 6578.46 158.069   2
   5  12   5 6667.37 132.318   1
   5  -5 -12 6438.93 192.593   2
  -5   5 -12 6431.01 216.203   1
  12  -5  -5 6792.70 200.838   1
  -5  12  -5 6031.82 193.900   1
 -12   5  -5 6785.30 215.010   1
  12   5   5 6419.28 194.181   1
  -7  12  -5 14848.9 305.136   2
  -7  12  -5 14971.5 331.703   1
  12   5   7 14094.6 316.739   1
  -5   7 -12 14995.9 359.575   1
   7  12   5 14290.8 257.865   1
   7 -12  -5 14879.3 266.047   1
   5  -7 -12 14005.4 269.469   1
 -12   5  -7 14738.5 347.048   1
   5  -7 -12 14415.3 332.728   2
   5  -9 -12 6054.48 143.877   1
   5  -9 -12 6220.21 214.324   2
  -5   9 -12 5693.43 217.306   1
   9 -12  -5 6106.39 167.938   1
   9  12   5 6198.19 164.122   1
 -12   5  -9 6017.23 217.712   1
  -9  12  -5 6069.67 206.053   1
   5 -11 -12 26513.1 533.256   2
  -5  11 -12 26682.4 404.051   2
  11 -12  -5 27109.0 464.983   1
  11  12   5 26073.4 456.495   1
   5 -11 -12 26641.5 376.563   1
 -11  12  -5 26987.0 520.815   1
  -5  11 -12 26403.8 550.192   1
 -12   5 -11 25958.6 537.550   1
  -6 -10 -12 12675.0 343.212   2
 -10  12   6 12508.8 269.698   1
  -6 -10 -12 12473.1 230.619   1
 -12  -6 -10 12365.0 300.914   1
 -12  -6  -8 803.832 73.8753   1
  -8  12   6 804.748 54.7374   1
  -6  -8 -12 773.073 54.0508   1
  -6  12   6 10673.5 198.691   1
  -6 -12  -6 10482.2 290.358   2
 -12   6   6 10951.1 271.186   1
  -6  -6 -12 10930.8 233.991   1
 -12  -6  -6 10799.1 268.644   1
  -4 -12  -6 3021.36 141.777   2
 -12   6   4 2704.60 125.668   1
 -12  -6  -4 2973.73 131.104   1
  -6  -4 -12 2660.88 111.222   1
  -6   4  12 2789.88 120.874   2
 -12   6   2 15825.1 341.909   1
  -2 -12  -6 15970.9 355.344   2
  -6  -2 -12 15972.1 323.434   1
 -12  -6  -2 15847.9 340.976   1
   0 -12  -6 182.125 45.0696   2
  12   6   0 111.136 33.1191   1
  -6   0  12 203.166 30.4307   2
 -12   6   0 191.870 49.0882   1
  12  -6   0 348.768 47.1859   1
  -6   0 -12 131.308 35.4485   1
  -2 -12   6 16597.1 270.460   2
   2 -12  -6 16554.4 361.158   2
  12   6   2 16618.6 347.377   1
 -12   6  -2 16744.7 361.582   1
  -6   2 -12 16225.9 355.702   1
  -6  -2  12 16462.8 278.715   2
  -2  12  -6 16537.4 288.796   2
  12  -6  -2 16844.5 345.242   1
   6  -4 -12 2927.01 125.729   2
  -4  12  -6 3206.13 138.836   1
  -4 -12   6 3355.92 96.8323   2
  -6   4 -12 3099.54 145.651   1
 -12   6  -4 3353.49 147.706   1
  12  -6  -4 3036.39 128.964   1
  -4  12  -6 3122.56 110.442   2
   4 -12  -6 3264.32 147.291   2
  12   6   4 2919.45 125.930   1
   4  12   6 3053.03 65.8749   1
  -6  -4  12 3110.05 83.2532   2
  -6 -12   6 11129.9 216.814   2
  -6  12  -6 11281.2 282.106   1
   6 -12  -6 10805.3 290.350   2
  12   6   6 10292.0 259.717   1
   6  -6 -12 10522.2 270.804   2
  12  -6  -6 11152.8 269.210   1
   6  -6 -12 10976.3 237.807   1
  -6  -6  12 10592.4 154.956   2
   6 -12  -6 11116.8 200.242   1
 -12   6  -6 10974.0 291.154   1
  -6   6 -12 10558.8 293.605   1
   6  12   6 11148.2 194.563   1
  -6  12  -6 10860.7 243.614   2
 -12   6  -8 711.525 77.8357   1
  -6   8 -12 699.069 81.8424   1
  -8  12  -6 853.512 67.4422   2
   8  12   6 847.512 53.1278   1
   6  -8 -12 660.783 71.0056   2
  -8  12  -6 847.538 78.9487   1
   8 -12  -6 868.332 55.9532   1
   6  -8 -12 838.109 55.6075   1
   6 -10 -12 11087.6 313.249   2
 -10  12  -6 11735.3 310.605   1
  10 -12  -6 11586.9 255.558   1
 -12   6 -10 11638.8 324.156   1
   6 -10 -12 11811.5 221.385   1
  -6  10 -12 11118.9 323.202   1
 -12  -7 -11 7709.50 227.164   1
  -7 -11 -12 7521.72 267.577   2
  -7 -11 -12 7736.07 170.768   1
 -11  12   7 7709.78 209.078   1
 -12  -7  -9 15092.8 335.054   1
  -7  -9 -12 15147.6 283.916   1
  -7  -7 -12 34278.1 530.422   1
 -12  -7  -7 34151.4 576.531   1
 -12  -7  -5 17882.9 367.164   1
  -5 -12  -7 17397.4 396.172   2
 -12   7   5 17489.4 368.507   1
  -7  -5 -12 18907.9 345.234   1
  -7  -3 -12 7682.80 206.940   1
  -3 -12  -7 7719.65 238.114   2
 -12  -7  -3 7824.52 220.526   1
 -12   7   3 7850.04 223.705   1
  -7   1  12 58926.9 818.927   2
  -1 -12  -7 57798.8 891.144   2
  -7  -1 -12 58040.9 855.832   1
 -12   7   1 59330.1 871.147   1
  -7  -1  12 60538.5 821.400   2
  12   7   1 61434.7 893.894   1
  12  -7  -1 61159.0 894.395   1
 -12   7  -1 63432.2 914.202   1
  -7   1 -12 62717.5 907.664   1
   1 -12  -7 62374.9 922.675   2
  -1  12  -7 59270.1 794.823   2
  -3 -12   7 7932.71 149.968   2
   3 -12  -7 7051.00 224.861   2
  -7  -3  12 7391.46 160.477   2
 -12   7  -3 7351.61 227.399   1
  -3  12  -7 7114.38 170.603   2
  -7   3 -12 7395.03 228.323   1
  -3  12  -7 7529.50 228.651   1
  12   7   3 7767.91 214.622   1
  12  -7  -3 7586.84 213.477   1
  -5  12  -7 18046.0 330.145   2
  -7   5 -12 18412.9 406.369   1
   5 -12  -7 18436.3 270.634   1
   5  12   7 18330.3 264.154   1
  -5 -12   7 19065.4 292.864   2
  -7  -5  12 18687.1 278.164   2
  12  -7  -5 18582.5 369.999   1
  -5  12  -7 18615.5 394.326   1
 -12   7  -5 18747.2 400.499   1
   7  -5 -12 18651.0 350.945   1
   5 -12  -7 18249.6 403.434   2
  12   7   5 18314.1 366.651   1
  12  -7  -7 36960.8 612.808   1
  12   7   7 36348.6 609.115   1
  -7   7 -12 37336.3 671.664   1
  -7  12  -7 37939.4 590.569   2
  -7 -12   7 38433.6 542.820   2
   7  12   7 38345.7 526.279   1
   7 -12  -7 39082.3 533.759   1
   7  -7 -12 37338.8 574.848   1
 -12   7  -7 38827.4 669.444   1
  -7  12  -7 37566.9 650.952   1
   9  12   7 13832.9 270.117   1
   7  -9 -12 13710.6 345.217   2
   9 -12  -7 14565.0 275.673   1
  -9  12  -7 14137.8 348.873   1
   7  -9 -12 13744.6 268.632   1
 -12   7  -9 14183.7 361.341   1
  -7   9 -12 13912.1 364.055   1
  -7  11 -12 6015.01 236.680   1
   7 -11 -12 6382.99 153.423   1
 -12   7 -11 6572.05 243.045   1
   7 -11 -12 6614.83 240.617   2
  11 -12  -7 6538.91 186.463   1
 -11  12  -7 6497.85 232.950   1
 -12  -8 -10 6675.31 208.260   1
  -8 -10 -12 6902.19 176.055   1
 -12  -8  -8 1182.91 84.4127   1
  -8  -8 -12 1287.32 75.9609   1
  -6 -12  -8 12045.7 325.072   2
 -12   8   6 11760.4 283.807   1
  -8  -6 -12 12269.7 265.005   1
 -12  -8  -6 11406.9 280.051   1
  -4 -12  -8 3205.96 154.770   2
 -12   8   4 3334.53 141.904   1
 -12  -8  -4 3394.00 139.926   1
  -8  -4 -12 3519.71 135.845   1
  -8   4  12 3327.60 137.430   2
 -12   8   2 24482.1 456.875   1
  -2 -12  -8 24263.9 484.400   2
  -8  -2 -12 24438.4 447.194   1
  -8   0  12 23973.3 409.144   2
 -12   8   0 24789.5 465.853   1
   0 -12  -8 24038.7 479.245   2
  -8   0 -12 24479.7 456.580   1
   2 -12  -8 24289.8 478.361   2
 -12   8  -2 24281.8 467.919   1
  12   8   2 24050.7 448.857   1
  12  -8  -2 24380.6 448.993   1
  -8  -2  12 24399.3 390.446   2
  -8   2 -12 23929.3 468.491   1
  -2  12  -8 24586.3 369.087   2
   4 -12  -8 3654.14 161.915   2
   8  -4 -12 3753.79 140.719   1
  -4  12  -8 3554.07 113.241   2
  -4 -12   8 3851.49 88.4251   2
  -8  -4  12 3819.04 107.225   2
  12   8   4 3786.32 144.934   1
  -8   4 -12 3467.49 158.570   1
  -4  12  -8 3427.61 157.388   1
  12  -8  -4 3802.59 145.850   1
 -12   8  -4 3757.29 160.552   1
  -8  -6  12 11498.5 194.009   2
  -6 -12   8 11637.5 199.910   2
  12  -8  -6 10842.2 264.417   1
   6  12   8 11698.8 194.755   1
   6 -12  -8 11077.6 305.730   2
  -6  12  -8 11554.5 244.405   2
 -12   8  -6 10873.6 298.392   1
   6 -12  -8 10831.4 193.238   1
   8  -6 -12 11278.0 257.523   1
  -6  12  -8 11051.2 297.900   1
  12   8   6 10652.9 262.531   1
  -8   6 -12 10963.7 306.195   1
   8  -8 -12 1399.70 78.7910   1
  -8  12  -8 1428.01 84.1721   2
  -8  -8  12 1415.84 43.6446   2
   8 -12  -8 1448.16 68.8021   1
   8  12   8 1418.65 66.9988   1
  -8   8 -12 1410.33 109.743   1
  -8  12  -8 1422.80 105.450   1
 -12   8  -8 1612.46 114.608   1
  12   8   8 1353.28 85.8536   1
  -8  10 -12 6507.86 244.036   1
   8 -10 -12 6742.27 172.256   1
  10  12   8 6283.19 172.461   1
 -10  12  -8 6611.22 235.011   1
  10 -12  -8 6309.73 177.550   1
 -12   8 -10 7108.52 249.779   1
 -11 -12  -9 14881.4 304.378   1
 -12  -9 -11 14451.7 327.473   1
  -9 -11 -12 14266.8 284.772   1
  -9  -9 -12 19288.9 354.879   1
 -12  -9  -9 18478.6 377.423   1
  -9  -7 -12 12642.1 277.978   1
  -7 -12  -9 12434.1 341.866   2
 -12   9   7 12200.2 292.391   1
 -12  -9  -7 11928.1 285.589   1
  -5 -12  -9 53006.2 859.433   2
 -12  -9  -5 52724.5 794.172   1
 -12   9   5 52823.3 796.985   1
  -9  -5 -12 52457.7 783.633   1
 -12   9   3 11708.1 283.074   1
  -9   3  12 11524.4 273.825   2
  -3 -12  -9 11542.3 311.805   2
  -9  -3 -12 11368.4 276.317   1
  -1 -12  -9 5789.67 208.666   2
 -12   9   1 5664.37 190.933   1
  -9  -1 -12 5804.15 193.448   1
  -9   1 -12 4997.84 182.648   1
 -12   9  -1 4936.81 181.822   1
  -9  -1  12 4997.82 149.938   2
   1 -12  -9 5127.11 194.249   2
  -9   3 -12 11395.4 303.353   1
  -9  -3  12 11548.7 231.578   2
   3 -12  -9 11601.6 308.703   2
  -3  12  -9 11277.5 215.556   2
  12   9   3 11491.3 277.400   1
 -12   9  -3 11811.9 300.483   1
  12  -9  -3 11767.4 278.433   1
   5 -12  -9 53110.9 665.946   1
  -5  12  -9 54370.5 742.729   2
  -5  12  -9 54049.1 864.587   1
  -5 -12   9 55175.2 661.655   2
  12   9   5 52880.7 797.725   1
   5 -12  -9 54029.4 864.374   2
  -9   5 -12 53673.5 862.659   1
 -12   9  -5 53318.8 853.971   1
   9  -5 -12 54176.3 800.390   1
  -9  -5  12 53928.6 716.828   2
  12  -9  -5 52185.5 796.331   1
  -9  -7  12 13382.6 222.324   2
   9  -7 -12 13023.1 288.053   1
  -7  12  -9 13478.9 279.467   2
  12   9   7 12609.0 294.263   1
   7 -12  -9 12762.2 343.178   2
  -7  12  -9 12937.5 341.023   1
  -7 -12   9 13442.6 218.507   2
   7 -12  -9 13734.7 234.793   1
  12  -9  -7 12935.4 295.782   1
  -9   7 -12 12985.8 346.591   1
 -12   9  -7 13491.7 345.772   1
   7  12   9 13223.9 232.777   1
   9  12   9 17254.9 312.845   1
   9 -12  -9 17499.2 317.134   1
  12   9   9 16945.4 354.735   1
  -9  12  -9 17417.2 353.786   2
  -9  12  -9 17931.5 420.923   1
  -9  -9  12 18159.3 258.281   2
 -12   9  -9 17638.2 421.961   1
  -9   9 -12 17738.3 427.885   1
   9  -9 -12 17196.6 336.240   1
 -12   9 -11 15595.8 401.512   1
  11 -12  -9 15333.1 305.259   1
 -11  12  -9 15379.0 389.742   1
  -9 -11  12 14000.6 197.170   2
   9 -11 -12 15005.8 288.933   1
  -9  11 -12 15344.3 397.965   1
 -10 -10 -12 25122.8 437.439   1
 -12 -10 -10 24778.3 457.351   1
 -10 -12 -10 24755.1 418.838   1
 -10  -8 -12 16368.0 335.526   1
 -12 -10  -8 16101.5 341.910   1
 -10  -6 -12 7687.56 218.256   1
 -12 -10  -6 7694.40 216.921   1
 -12  10   6 7378.04 216.884   1
  -6 -12 -10 7196.72 253.360   2
  -4 -12 -10 15722.5 387.641   2
 -10  -4 -12 15891.0 343.201   1
 -12  10   4 15768.6 342.332   1
 -12  10   2 9046.42 246.979   1
  -2 -12 -10 8961.18 272.977   2
 -10   2  12 9054.75 237.084   2
 -10  -2 -12 9429.88 255.183   1
 -10   0 -12 3609.72 157.045   1
   0 -12 -10 3803.87 170.536   2
 -12  10   0 3492.18 151.371   1
   2 -12 -10 9515.84 282.698   2
 -12  10  -2 9652.88 270.321   1
 -10   2 -12 9558.62 275.455   1
  -2  12 -10 10103.4 177.225   2
 -10  -2  12 9724.07 222.261   2
  -4  12 -10 14797.9 365.998   1
   4 -12 -10 14445.5 359.293   2
  -4  12 -10 14669.0 258.046   2
  12 -10  -4 14212.0 314.984   1
 -10  -4  12 14754.4 273.954   2
 -10   4 -12 14181.9 356.195   1
  12  10   4 13905.5 313.056   1
 -12  10  -4 14625.7 349.993   1
 -10  -6  12 7796.75 168.932   2
  10   6  12 7071.04 212.798   1
 -10   6 -12 6917.36 245.365   1
   6 -12 -10 7386.46 144.008   1
   6 -12 -10 7692.35 255.981   2
  -6  12 -10 7360.90 249.994   1
  -6  12 -10 7350.32 183.895   2
  12 -10  -6 7615.48 212.069   1
  12  10   6 7302.77 207.304   1
 -12  10  -6 7421.39 246.188   1
  10  -6 -12 7340.08 212.305   1
 -12  10  -8 17572.6 419.495   1
  12 -10  -8 17769.2 361.162   1
 -10  -8  12 18819.3 292.175   2
 -10   8 -12 17552.9 426.416   1
  -8 -12  10 18322.9 272.305   2
   8  12  10 18105.3 308.299   1
  -8  12 -10 18439.2 353.757   2
  10   8  12 17320.7 359.390   1
  12  10   8 17839.9 359.732   1
  10  -8 -12 17629.0 357.975   1
   8 -12 -10 18728.8 309.405   1
  -8  12 -10 17658.1 425.417   1
 -10 -10  12 25061.7 347.930   2
 -12  10 -10 24919.3 531.745   1
  10  12  10 23720.3 408.522   1
  12  10  10 21724.7 433.452   1
  10 -10 -12 24876.2 431.939   1
 -10  12 -10 24400.5 524.033   1
 -10  10 -12 24246.9 531.471   1
  10 -12 -10 23115.4 403.059   1
 -11 -12 -11 3568.16 133.916   1
 -12 -11 -11 3640.50 143.732   1
 -11 -11 -12 3744.64 140.055   1
 -11  -9 -12 20516.6 404.697   1
 -12 -11  -9 21090.7 404.342   1
  -9 -12 -11 21484.6 361.620   1
 -12  11   7 5641.91 185.376   1
  -7 -12 -11 5821.77 234.957   2
 -11  -7 -12 6191.62 197.167   1
  -7 -12 -11 6112.37 138.028   1
 -12 -11  -7 5763.81 185.856   1
  -5 -12 -11 50.7563 41.9353   2
 -11  -5 -12 68.0887 38.3561   1
 -12  11   5-2.32222 34.5083   1
  -3 -12 -11 4749.06 199.403   2
 -12  11   3 4285.80 165.241   1
 -11  -3 -12 4736.97 178.980   1
 -12  11   1 25922.3 487.043   1
 -11  -1 -12 25886.9 500.752   1
 -11   1  12 26233.6 467.446   2
  -1 -12 -11 26358.8 530.741   2
 -11   1 -12 24934.7 494.452   1
 -12  11  -1 24879.4 482.866   1
   1 -12 -11 24298.6 504.614   2
  -3  12 -11 4343.27 106.933   2
 -11   3 -12 3911.59 178.391   1
 -12  11  -3 4009.88 171.564   1
   3 -12 -11 4476.81 188.590   2
  -5  12 -11 84.5599 47.5649   1
  12 -11  -5 68.2771 28.4970   1
 -12  11  -5 88.5322 44.0388   1
 -11  -5  12 110.671 26.0699   2
 -11   5 -12 65.0352 44.4864   1
   5 -12 -11 176.657 50.0000   2
  12  11   5 82.1024 31.0682   1
  -5  12 -11 109.608 24.3225   2
   5 -12 -11 109.380 14.5275   1
 -11   7 -12 5723.11 228.399   1
  -7  12 -11 6265.55 236.032   1
 -11  -7  12 6070.86 152.153   2
  -7  12 -11 5999.18 168.130   2
  12  11   7 5938.76 184.195   1
   7 -12 -11 5709.33 225.201   2
  12 -11  -7 5886.93 184.646   1
   7 -12 -11 6162.90 138.908   1
 -12  11  -7 5977.32 225.474   1
  -9  12 -11 21169.9 487.781   1
  12  11   9 20203.4 396.165   1
  12 -11  -9 22759.7 412.703   1
 -12  11  -9 21305.0 483.363   1
  -9 -12  11 22031.2 306.045   2
  11   9  12 20219.7 405.526   1
   9 -12 -11 20951.8 361.271   1
   9  12  11 21039.8 363.705   1
 -11   9 -12 21465.9 493.171   1
 -11  12 -11 3616.68 187.076   1
 -11  11 -12 3427.11 184.518   1
 -12  11 -11 3580.90 188.823   1
 -12 -12 -12 41943.0 659.593   1
 -12 -10 -12 5140.10 177.372   1
 -12 -12 -10 5133.73 171.037   1
 -10 -12 -12 5093.83 155.914   1
 -12  -8 -12 3279.14 143.966   1
  -8 -12 -12 3238.75 179.098   2
  -8 -12 -12 3270.84 104.755   1
  -6 -12 -12 29974.0 408.919   1
 -12  12   6 29417.5 516.771   1
  -6 -12 -12 29324.7 601.207   2
 -12  -6 -12 28479.2 536.863   1
  -4 -12 -12 59760.9 974.588   2
 -12  -4 -12 61076.3 924.972   1
 -12  12   4 60674.5 894.936   1
 -12  12   2 15701.5 348.721   1
 -12  -2 -12 15987.1 370.357   1
  -2 -12 -12 15738.0 392.798   2
 -12   0  12 2633.65 120.849   2
 -12  12   0 2606.52 134.656   1
   0 -12 -12 2534.36 146.172   2
 -12   0 -12 2626.15 141.146   1
 -12  -2  12 16315.0 332.567   2
   2 -12 -12 16526.4 397.000   2
 -12  12  -2 16421.6 376.116   1
 -12   2 -12 16528.9 391.622   1
 -12   4 -12 56690.2 936.898   1
  -4  12 -12 61082.8 762.374   2
  -4  12 -12 58562.8 960.047   1
  12  12   4 54919.1 852.926   1
   4 -12 -12 58310.1 938.926   2
 -12  12  -4 57879.7 915.818   1
 -12  -6  12 29279.9 470.043   2
  12 -12  -6 28574.0 503.112   1
  12  12   6 27802.0 496.004   1
  -6  12 -12 28962.6 595.626   1
   6 -12 -12 28362.5 580.287   2
   6 -12 -12 31746.1 415.858   1
 -12  12  -6 28230.8 565.381   1
 -12   6 -12 29266.1 591.802   1
  -6  12 -12 28692.4 456.436   2
  12 -12  -8 3252.75 131.082   1
  12  12   8 2715.55 120.410   1
   8 -12 -12 3152.77 102.146   1
  -8  12 -12 3185.28 174.592   1
 -12   8 -12 2914.11 165.121   1
  -8  12 -12 3138.79 121.048   2
 -12  12  -8 2824.72 158.208   1
 -12  10 -12 4414.57 210.628   1
 -10 -12  12 4459.04 95.4727   2
 -12  12 -10 4409.46 208.361   1
 -10  12 -12 4614.74 213.997   1
 -12  12 -12 45355.2 837.266   1
  -1  13   0 49402.0 721.903   2
   0  -1 -13 46955.4 677.781   2
  -1 -13   0 47891.0 712.604   2
 -13   0   1 46580.9 748.773   1
  -1  13   0 48090.0 661.270   1
   0   1 -13 47132.4 654.363   2
   1 -13   0 48314.0 712.923   2
 -13   0  -1 47575.1 750.734   1
  -3  13   0 14101.5 301.306   2
 -13   0  -3 14024.3 323.441   1
   0   3 -13 13381.2 225.501   2
   0  -3 -13 13446.8 286.155   2
  -3  13   0 13514.6 255.612   1
   3 -13   0 13157.2 295.387   2
 -13   0   3 13426.9 319.912   1
  -3 -13   0 13805.4 294.810   2
  -5  13   0 250.626 36.9645   1
  -5 -13   0 194.311 39.6729   2
   0   5 -13 274.824 18.5284   2
 -13   0  -5 344.347 58.5261   1
   0  -5 -13 212.222 40.0823   2
  -5  13   0 322.947 45.9491   2
   0  -7 -13 22922.6 451.359   2
   0  -7 -13 23866.9 371.669   1
 -13   0  -7 23269.2 465.935   1
  -7  13   0 23259.5 406.966   1
   0  -9 -13 1624.92 59.2245   1
 -13   0  -9 1393.08 102.383   1
   0  -9 -13 1551.64 107.506   2
   9 -13   0 1579.93 92.8941   1
  -9  13   0 1554.23 93.4758   1
   9  13   0 1529.13 90.1764   1
   0 -11 -13 25.2272 32.7815   2
 -13   0 -11 37.2324 40.7714   1
  -1 -12 -13 7516.78 258.965   2
 -13  -1 -12 7356.55 245.255   1
 -12  13   1 6808.78 220.079   1
 -13  -1 -10 737.004 80.3195   1
  -1 -10 -13 975.721 38.6947   1
  -1 -10 -13 867.190 87.0274   2
 -10  13   1 845.867 71.0474   1
  -1  -8 -13 31455.4 566.953   2
   8  13  -1 29768.3 514.560   1
 -13  -1  -8 30974.8 566.509   1
  -8  13   1 30489.5 503.941   1
  -1  -8 -13 31732.0 444.989   1
  -1  -6 -13 2299.83 91.4467   1
 -13  -1  -6 2401.79 126.019   1
  -6 -13  -1 2136.48 113.973   2
  -1  -6 -13 2482.62 123.646   2
  -6  13   1 2344.45 95.8058   1
   1   4 -13 2175.30 59.5365   2
  -4  13   1 2511.06 89.9991   1
  -1  -4 -13 2320.04 111.645   2
  -4  13   1 2288.83 112.532   2
 -13  -1  -4 2174.10 119.165   1
 -13   1   4 2186.90 120.443   1
  -4 -13  -1 2106.94 108.083   2
 -13  -1  -2 15378.0 345.988   1
   1   2 -13 15914.3 257.347   2
  -2  13   1 15679.0 330.589   2
  -2 -13  -1 15430.4 323.074   2
  -1  -2 -13 15536.3 307.838   2
 -13   1   2 15430.4 348.390   1
  -2  13   1 15628.6 266.423   1
   2 -13   1 15549.6 316.563   2
   0 -13   1 20249.9 371.204   2
   0  13   1 20601.4 323.061   1
  -1   0 -13 20278.7 349.127   2
   1   0 -13 20461.7 340.242   2
   0 -13  -1 19907.5 383.658   2
 -13  -1   0 20208.6 411.012   1
 -13   1   0 20448.2 411.646   1
  -2  13  -1 15138.9 286.027   1
  -1   2 -13 15589.1 266.179   2
   1  -2 -13 14952.2 295.651   2
  -2  13  -1 15585.5 315.182   2
 -13   1  -2 15161.7 342.170   1
   2 -13  -1 14997.8 319.857   2
 -13  -1   2 14971.7 342.288   1
  -2 -13   1 14828.4 303.718   2
  -4  13  -1 2172.10 104.887   2
  -4 -13   1 2118.33 102.049   2
   1  -4 -13 2485.07 111.856   2
   4 -13  -1 2136.74 111.422   2
 -13   1  -4 1860.56 111.953   1
  -1   4 -13 2133.70 69.5670   2
  -4  13  -1 2234.74 95.3952   1
  -1   6 -13 2367.50 57.3757   2
  -6  13  -1 2301.01 102.846   1
 -13   1  -6 2194.66 127.455   1
  -6 -13   1 2322.40 110.186   2
   1  -6 -13 2230.56 115.462   2
   6  13   1 2350.36 96.1729   1
   1  -8 -13 31800.8 568.934   2
 -13   1  -8 30917.0 573.543   1
  -8  13  -1 31844.6 527.421   1
  10  13   1 999.420 73.8460   1
   1 -10 -13 1029.88 92.9148   2
   1 -10 -13 1036.30 40.2863   1
  10 -13  -1 1056.14 76.1357   1
 -10  13  -1 921.952 77.1310   1
 -13   1 -10 1098.52 94.5876   1
   1 -10 -13 994.557 39.8217   1
   1 -12 -13 7760.66 261.003   2
 -12  13  -1 7076.33 231.730   1
 -13   1 -12 7309.16 250.159   1
 -11  13   2 40.7483 32.7727   1
 -13  -2 -11 165.942 53.2258   1
  -2 -11 -13 99.7534 50.9866   2
  -2  -9 -13 12497.6 328.225   2
 -13  -2  -9 13027.3 323.760   1
  -2  -9 -13 13042.0 218.403   1
  -9  13   2 12965.2 281.078   1
  -7  13   2 569.340 50.3858   1
 -13  -2  -7 520.799 64.2009   1
  -2  -7 -13 445.503 59.0832   2
  -2  -7 -13 502.370 41.6768   1
  -2  -5 -13 18976.5 342.606   1
 -13   2   5 19159.2 405.919   1
  -5 -13  -2 19259.0 394.445   2
 -13  -2  -5 19243.8 403.893   1
  -5  13   2 20272.4 324.204   1
  -2  -5 -13 19157.9 389.223   2
 -13  -2  -3 26038.7 483.729   1
 -13   2   3 25716.9 483.426   1
  -2  -3 -13 25611.0 451.762   2
   2   3 -13 26024.7 361.303   2
  -3 -13  -2 25853.9 467.114   2
  -3  13   2 26124.5 472.682   2
  -3  13   2 25542.2 381.450   1
  -2  -3 -13 25907.3 441.007   1
   2   1 -13 3841.48 110.155   2
  -1 -13  -2 3983.05 149.959   2
   1 -13   2 3932.46 133.923   2
  -2  -1 -13 4004.60 133.841   2
  -1  13   2 3757.47 147.121   2
 -13  -2  -1 3940.15 158.642   1
 -13   2   1 3767.11 158.128   1
  -1  13   2 3973.20 98.7920   1
   2  -1 -13 3600.64 119.459   2
  -1 -13   2 3615.41 125.383   2
   1 -13  -2 3869.54 146.364   2
  -1  13  -2 3603.81 129.420   2
  -2   1 -13 3466.78 115.334   2
 -13   2  -1 3746.55 155.901   1
 -13  -2   1 3757.90 155.314   1
   3 -13  -2 26776.9 480.492   2
  -3 -13   2 26776.2 443.664   2
  -3  13  -2 27393.1 458.595   2
 -13   2  -3 26877.2 499.072   1
  -3  13  -2 26232.3 442.334   1
   2  -3 -13 26082.5 447.489   2
   5 -13  -2 19689.2 397.561   2
 -13   2  -5 19258.3 407.457   1
  -5  13  -2 19699.0 374.700   2
  -5 -13   2 18659.1 356.726   2
  -5  13  -2 18519.8 355.352   1
   5  13   2 19052.6 318.942   1
   2  -5 -13 19210.9 377.060   2
  -7  13  -2 345.921 48.4715   1
   7  13   2 354.715 40.2239   1
  -7 -13   2 412.499 49.5570   2
 -13   2  -7 414.405 62.1546   1
   2  -7 -13 423.233 56.2375   2
   2  -9 -13 12223.7 317.610   2
   9 -13  -2 13033.1 281.282   1
   2  -9 -13 12459.9 214.781   1
 -13   2  -9 12170.3 322.175   1
  -9  13  -2 12541.6 297.064   1
  11  13   2 17.6615 27.4505   1
   2 -11 -13 77.7093 8.99333   1
 -13   2 -11 55.0951 48.8354   1
   2 -11 -13 68.9689 40.8837   2
   2 -11 -13 71.2927 8.83608   1
 -11  13  -2 28.6229 35.8915   1
 -12  13   3 44099.3 705.477   1
 -13  -3 -12 44141.8 744.075   1
  -3 -12 -13 43999.0 782.611   2
 -10  13   3 23353.1 431.567   1
  -3 -10 -13 24713.0 345.423   1
 -13  -3 -10 24145.4 483.590   1
  -3 -10 -13 23664.1 501.534   2
  -3  -8 -13 116.134 23.9210   1
  -8  13   3 59.3427 27.1056   1
 -13  -3  -8 93.3956 42.6124   1
  -3  -8 -13 79.4893 39.5039   2
 -13  -3  -6 8092.43 237.952   1
  -6  13   3 8085.88 182.202   1
  -3  -6 -13 7976.03 237.281   2
  -6 -13  -3 8457.01 243.119   2
  -3  -6 -13 8478.25 190.752   1
 -13  -3  -4 6419.55 206.779   1
  -4 -13  -3 6560.13 206.024   2
  -4  13   3 6583.03 140.981   1
  -3  -4 -13 6408.90 175.106   1
  -3  -4 -13 6360.15 197.626   2
 -13   3   4 6230.57 204.487   1
  -3  -2 -13 9161.65 230.665   1
   3   2 -13 9439.42 179.877   2
  -2 -13  -3 9160.12 247.061   2
  -2  13   3 9404.48 162.486   1
 -13   3   2 9410.61 257.531   1
 -13  -3  -2 9195.58 252.571   1
   0 -13   3 1820.40 85.0370   2
   0 -13  -3 1840.67 103.473   2
 -13   3   0 1866.89 110.232   1
 -13  -3   0 1870.31 111.023   1
   3   0 -13 1725.88 76.2939   2
  -3   0 -13 1854.88 102.057   1
   0  13   3 1966.68 57.1550   1
 -13   3  -2 9130.32 256.701   1
   3  -2 -13 9196.93 214.422   2
 -13  -3   2 9162.21 257.134   1
   2 -13  -3 9299.81 246.123   2
  -2 -13   3 9506.04 213.790   2
  -2  13  -3 8783.83 223.195   1
  -2  13  -3 9235.62 218.614   2
   2  13   3 9651.41 163.189   1
   4 -13  -3 5850.80 196.874   2
   3  -4 -13 6213.96 183.128   2
 -13   3  -4 6408.28 213.100   1
  -4  13  -3 6686.31 185.315   2
  -4  13  -3 6215.24 181.811   1
  -4 -13   3 6280.36 171.213   2
   4  13   3 6238.58 135.538   1
  -6 -13   3 7850.53 203.059   2
  -6  13  -3 8256.95 220.036   1
  -6  13  -3 8241.38 218.849   2
   6  13   3 8282.76 178.929   1
 -13   3  -6 7929.35 244.123   1
   3  -6 -13 8203.29 228.856   2
   3  -8 -13 302.890 52.9931   2
   8  13   3 179.983 33.3809   1
  -8  13  -3 159.324 38.7409   1
 -13   3  -8 164.573 49.8619   1
   8 -13  -3 175.099 31.9570   1
  -3  10 -13 24891.2 338.225   2
   3 -10 -13 24936.0 502.451   2
 -13   3 -10 24690.5 509.373   1
  10 -13  -3 24996.5 443.740   1
 -10  13  -3 25240.4 480.302   1
   3 -10 -13 24714.3 354.620   1
 -13  -3  12 46358.1 701.996   2
  -3  12 -13 46550.8 579.589   2
   3 -12 -13 44964.3 790.978   2
 -12  13  -3 45093.3 758.542   1
 -13   3 -12 44510.8 788.711   1
 -13  -4 -11 4840.23 192.144   1
  -4 -11 -13 5037.96 211.350   2
 -11  13   4 5085.78 171.223   1
  -4 -11 -13 5197.46 106.762   1
 -13  -4  -9 22540.8 458.404   1
  -4  -9 -13 22433.3 479.209   2
  -9  13   4 22929.4 402.468   1
  -4  -9 -13 23932.7 357.826   1
  -4  -7 -13 16355.7 289.373   1
 -13  -4  -7 15568.0 353.863   1
  -7  13   4 16301.0 289.355   1
  -4  -7 -13 15254.3 361.832   2
 -13  -4  -5 32154.8 564.304   1
  -5 -13  -4 32859.7 577.378   2
  -4   5  13 31785.5 548.785   2
  -4  -5 -13 31636.9 564.213   2
  -5  13   4 33464.3 459.060   1
 -13   4   5 32044.5 567.189   1
  -4  -5 -13 31902.4 505.818   1
  -4  -3 -13 15227.0 313.023   1
  -3  13   4 15807.9 233.902   1
  -3 -13  -4 15710.7 349.536   2
 -13   4   3 15570.3 348.192   1
 -13  -4  -3 15329.0 345.153   1
  -4  -1 -13 13536.5 299.766   1
   1 -13   4 13846.5 268.892   2
  -1 -13  -4 13813.5 315.774   2
  -4   1  13 13369.6 271.532   2
 -13   4   1 13776.4 320.504   1
 -13  -4  -1 13726.1 319.180   1
  -1  13   4 13485.6 187.832   1
   1  13   4 13557.5 187.357   1
  -4   1 -13 13608.2 315.074   1
  -1 -13   4 14014.8 263.386   2
   1 -13  -4 13861.6 317.425   2
 -13  -4   1 13555.8 321.636   1
 -13   4  -1 13627.9 322.615   1
   4  -1 -13 13228.2 264.499   2
  -1  13  -4 13621.7 269.703   2
  -3 -13   4 15302.1 288.497   2
 -13   4  -3 16162.9 360.730   1
  -3  13  -4 15430.2 304.600   2
   4  -3 -13 16127.0 314.558   2
   3 -13  -4 15206.7 342.312   2
  -4   3 -13 15957.3 358.850   1
  -3  13  -4 15540.0 325.367   1
   3  13   4 15593.2 231.037   1
   4  -5 -13 32342.6 542.062   2
  -5  13  -4 32634.9 524.508   2
 -13   4  -5 31694.0 577.634   1
  -5  13  -4 31870.8 543.378   1
  -5 -13   4 31920.6 498.308   2
   5 -13  -4 31645.8 569.633   2
   5  13   4 32508.8 452.151   1
  -4   5 -13 32404.9 587.985   1
   4  -7 -13 15392.5 347.139   2
 -13   4  -7 15577.6 367.639   1
   7  13   4 15394.6 279.365   1
  -4   7 -13 15356.5 375.661   1
  -7  13  -4 15830.0 328.696   2
  -7  13  -4 15749.9 340.302   1
   7 -13  -4 15957.0 286.632   1
  -7 -13   4 15232.1 308.357   2
   4  -9 -13 21475.1 450.044   2
  -9  13  -4 21105.4 430.818   1
  -4   9 -13 21129.6 472.902   1
   9  13   4 20797.4 378.607   1
   9 -13  -4 21560.9 381.954   1
 -13   4  -9 21429.5 461.715   1
   4  -9 -13 22041.3 341.172   1
   4 -11 -13 5829.73 117.065   1
  11 -13  -4 5661.56 178.784   1
  -4  11 -13 5591.16 124.215   2
  11  13   4 5345.10 172.739   1
 -11  13  -4 5472.19 203.636   1
   4 -11 -13 5396.80 212.105   2
  -4  11 -13 5793.73 232.394   1
 -13   4 -11 5837.11 225.170   1
 -13  -5 -12 3764.09 167.564   1
  -5 -12 -13 3607.56 184.759   2
  -5 -12 -13 3880.83 84.0745   1
 -12  13   5 4022.45 154.769   1
 -13  -5 -10 2143.85 123.248   1
  -5 -10 -13 2297.85 79.7894   1
  -5 -10 -13 1794.07 127.229   2
 -10  13   5 2243.25 103.836   1
 -13  -5  -8 1570.10 102.861   1
  -5  -8 -13 1306.42 103.525   2
  -5  -8 -13 1419.32 70.7370   1
  -8  13   5 1395.30 72.7611   1
  -6 -13  -5 5581.58 204.662   2
  -5  -6 -13 5616.24 157.503   1
 -13   5   6 6130.72 203.287   1
 -13  -5  -6 5806.88 198.029   1
  -6  13   5 5833.51 136.801   1
 -13   5   4 2891.79 136.505   1
  -4 -13  -5 3100.52 145.324   2
  -5   4  13 2903.46 125.580   2
  -5  -4 -13 2946.29 117.491   1
  -4  13   5 2983.85 75.0497   1
 -13  -5  -4 3093.68 141.739   1
  -5  -2 -13 6965.66 199.274   1
  -2 -13  -5 6852.30 217.785   2
 -13  -5  -2 6939.26 216.759   1
 -13   5   2 7212.10 220.170   1
 -13   5   0 8217.09 239.802   1
   0 -13  -5 8032.55 234.755   2
 -13  -5   0 8193.01 238.382   1
   0 -13   5 8186.90 184.267   2
  -5   0 -13 8108.43 226.919   1
  -5   0  13 7839.04 187.841   2
  -5   2 -13 7119.66 221.884   1
   5  -2 -13 7012.66 187.379   2
 -13   5  -2 7297.73 228.933   1
  -2 -13   5 7231.83 167.835   2
  -5  -2  13 7598.87 162.106   2
  -2  13  -5 7397.18 181.779   2
   2 -13  -5 7401.59 226.100   2
  -4  13  -5 2948.03 114.952   2
   5  -4 -13 3040.59 126.613   2
  -5   4 -13 2975.98 146.007   1
 -13   5  -4 3219.77 150.960   1
  -4 -13   5 3081.47 105.274   2
   4 -13  -5 2944.33 143.155   2
   4  13   5 3117.51 73.3360   1
  -4  13  -5 3041.09 134.804   1
   6 -13  -5 5921.80 209.271   2
  -6  13  -5 5449.39 169.691   2
   5  -6 -13 5538.82 187.296   2
   6  13   5 5688.07 130.858   1
  -6  13  -5 5684.11 190.047   1
  -6 -13   5 5646.09 154.205   2
  -5   6 -13 5552.00 209.274   1
 -13   5  -6 5504.35 203.151   1
  -8  13  -5 934.356 80.4157   1
   8  13   5 1085.60 61.7752   1
  -5   8 -13 1041.67 99.4880   1
 -13   5  -8 1017.14 94.3588   1
   8 -13  -5 949.093 60.3880   1
   5  -8 -13 1143.26 64.7212   1
   5  -8 -13 925.029 83.4095   2
   5 -10 -13 2244.50 133.932   2
 -10  13  -5 2471.81 135.070   1
   5 -10 -13 2284.48 82.0401   1
  -5  10 -13 2439.87 148.227   1
  10 -13  -5 2505.89 108.330   1
 -13   5 -10 2545.95 146.642   1
  -5  12 -13 3358.41 102.089   2
 -12  13  -5 3336.87 164.582   1
   5 -12 -13 3393.40 174.169   2
  -5  12 -13 3450.73 182.055   1
  12  13   5 3177.75 134.013   1
   5 -12 -13 3528.25 82.1625   1
 -13   5 -12 3325.97 173.817   1
  -6 -11 -13 8526.34 171.764   1
 -13  -6 -11 7895.63 242.571   1
  -6 -11 -13 8052.93 279.283   2
 -11  13   6 8084.83 217.376   1
  -6  -9 -13 5174.72 142.406   1
 -13  -6  -9 4808.12 182.619   1
  -6  -9 -13 4876.94 204.531   2
  -9  13   6 5303.32 151.340   1
 -13  -6  -7 15161.8 343.149   1
  -7 -13  -6 15632.9 375.715   2
  -7  13   6 15205.6 265.544   1
  -6  -7 -13 15118.8 292.779   1
  -6  -5 -13 6586.00 181.776   1
 -13   6   5 6578.69 210.539   1
  -5 -13  -6 6659.08 225.400   2
  -5  13   6 6916.38 132.389   1
 -13  -6  -5 6532.97 208.991   1
  -6  -3 -13 57271.5 842.084   1
  -3 -13  -6 59400.7 902.279   2
 -13  -6  -3 58329.5 879.093   1
 -13   6   3 59110.5 883.174   1
  -1 -13  -6 3570.68 154.780   2
  -6   1  13 3539.86 125.416   2
 -13   6   1 3440.76 149.938   1
 -13  -6  -1 3688.94 154.681   1
  -6  -1 -13 3439.79 139.820   1
  -1 -13   6 3722.27 110.253   2
 -13   6  -1 3850.24 161.259   1
   1 -13  -6 3505.03 154.269   2
  -6  -1  13 3630.71 115.835   2
  -6   1 -13 3613.87 152.364   1
  -1  13  -6 3848.12 116.812   2
  -6  -3  13 61999.5 789.439   2
  -3 -13   6 61669.0 800.436   2
   3 -13  -6 60897.0 922.944   2
  -3  13  -6 59806.1 902.930   1
  -6   3 -13 59625.1 924.824   1
  -3  13  -6 60457.6 831.357   2
 -13   6  -3 59592.6 923.351   1
  -5 -13   6 6344.16 155.074   2
   6  -5 -13 6087.84 195.651   2
   5 -13  -6 6620.95 222.708   2
  -5  13  -6 6513.77 208.153   1
  -5  13  -6 6549.61 178.315   2
   5  13   6 6486.09 122.785   1
 -13   6  -5 6360.97 219.811   1
  -6   5 -13 6509.19 224.748   1
   7 -13  -6 14660.5 262.697   1
  -7  13  -6 15305.3 313.277   2
  -7 -13   6 14638.2 280.593   2
 -13   6  -7 14976.3 364.418   1
   6  -7 -13 14814.8 345.418   2
   6  -7 -13 15236.3 293.206   1
  -7  13  -6 14764.7 346.212   1
   7  13   6 14470.2 254.932   1
  -6   7 -13 14791.0 372.664   1
   6  -9 -13 4784.78 190.411   2
  -9  13  -6 4634.82 185.012   1
   9  13   6 4748.72 138.048   1
 -13   6  -9 4546.31 196.950   1
   9 -13  -6 4330.90 137.845   1
  -6   9 -13 4488.35 199.975   1
   6  -9 -13 4627.32 134.367   1
  -6  11 -13 8478.03 189.735   2
   6 -11 -13 8496.73 275.110   2
   6 -11 -13 8632.16 175.953   1
 -11  13  -6 8375.86 267.044   1
  11 -13  -6 8270.18 217.093   1
  -6  11 -13 8592.79 289.566   1
 -13   6 -11 8706.66 283.982   1
 -12  13   7 6866.70 208.007   1
 -13  -7 -12 7417.10 232.548   1
  -7 -12 -13 6795.18 263.009   2
  -7 -12 -13 7534.91 160.055   1
 -13  -7 -10 22572.4 448.163   1
  -7 -10 -13 22377.5 503.343   2
 -10  13   7 22416.5 397.083   1
  -7 -10 -13 22386.6 371.582   1
 -13  -7  -8 16574.1 361.965   1
  -7  -8 -13 16147.5 311.169   1
  -6 -13  -7 26869.6 532.034   2
 -13   7   6 25602.6 490.886   1
  -7  -6 -13 26370.8 447.940   1
 -13  -7  -6 26596.4 491.346   1
  -7   4  13 732.721 65.9153   2
  -7  -4 -13 795.050 65.2551   1
  -4 -13  -7 704.592 78.7685   2
 -13  -7  -4 811.530 76.4013   1
 -13   7   4 798.615 75.6154   1
 -13   7   2 1702.27 107.775   1
  -2 -13  -7 1829.03 117.227   2
  -7  -2 -13 1804.40 101.847   1
 -13  -7  -2 2122.35 118.769   1
   0 -13  -7 10063.4 279.874   2
 -13   7   0 10324.4 273.850   1
  -7   0  13 10115.2 225.485   2
  -7   0 -13 9724.92 262.014   1
  -7   2 -13 1833.50 111.352   1
   2 -13  -7 1963.55 117.776   2
 -13   7  -2 1937.06 117.626   1
  -2  13  -7 1786.81 77.5148   2
  -7  -2  13 1816.66 78.4146   2
  -2 -13   7 1960.02 70.2900   2
   4 -13  -7 863.414 84.0005   2
  -4  13  -7 809.920 76.9749   1
  -7  -4  13 759.185 44.1675   2
  -7   4 -13 701.107 76.5974   1
  -4  13  -7 782.269 56.0842   2
  -4 -13   7 782.373 46.0453   2
 -13   7  -4 858.071 84.9552   1
  -6  13  -7 26927.2 452.934   2
  -6 -13   7 27476.9 407.958   2
  -7   6 -13 26750.2 535.438   1
  -7  -6  13 27533.9 355.373   2
  -6  13  -7 26559.8 512.151   1
 -13   7  -6 27058.0 526.033   1
   6 -13  -7 25480.5 379.580   1
   7  -6 -13 26730.0 456.059   1
   6  13   7 26424.4 373.720   1
   6 -13  -7 26343.6 528.111   2
   8  13   7 16712.8 289.538   1
   8 -13  -7 17206.6 296.149   1
  -8  13  -7 16796.0 342.558   2
  -8 -13   7 16774.3 305.168   2
  -7   8 -13 16979.0 412.160   1
   7  -8 -13 16473.4 383.088   2
  -8  13  -7 16322.6 383.678   1
   7  -8 -13 16620.6 316.430   1
 -13   7  -8 17047.1 403.312   1
  10  13   7 21881.5 386.557   1
 -10  13  -7 21968.4 474.243   1
  -7  10 -13 21659.3 498.464   1
   7 -10 -13 22004.3 480.580   2
  10 -13  -7 21986.4 389.495   1
   7 -10 -13 23060.7 373.573   1
 -13   7 -10 22398.7 493.006   1
 -12  13  -7 8062.56 271.476   1
   7 -12 -13 7574.94 271.537   2
  -7  12 -13 8260.07 289.176   1
 -13   7 -12 7747.13 279.240   1
   7 -12 -13 8234.76 170.707   1
  12 -13  -7 8652.28 226.705   1
  -7  12 -13 7965.83 195.915   2
 -13  -8 -11 16291.2 367.268   1
  -8 -11 -13 15891.9 424.829   2
  -8 -11 -13 16966.4 304.278   1
  -8  -9 -13 2812.96 111.887   1
 -13  -8  -9 2795.61 135.033   1
  -7 -13  -8 28163.1 571.413   2
  -8  -7 -13 29218.5 484.572   1
 -13  -8  -7 28147.9 515.926   1
 -13   8   5 1903.21 111.860   1
  -5 -13  -8 2049.30 127.771   2
 -13  -8  -5 1968.16 112.836   1
  -8  -5 -13 1798.22 97.6742   1
  -8  -3 -13 10178.6 256.998   1
  -8   3  13 9842.77 249.432   2
  -3 -13  -8 10505.4 296.214   2
 -13  -8  -3 10326.4 272.651   1
 -13   8   3 10149.6 270.643   1
 -13   8   1 2626.69 131.870   1
  -1 -13  -8 2531.58 137.510   2
  -8  -1 -13 2490.25 124.469   1
 -13   8  -1 2298.49 126.731   1
  -8  -1  13 2144.39 92.2224   2
   1 -13  -8 2127.79 127.456   2
  -8   1 -13 1902.37 113.681   1
  -8   3 -13 9137.29 270.652   1
  -8  -3  13 9707.92 200.731   2
  -3  13  -8 9688.09 202.812   2
 -13   8  -3 9673.53 276.148   1
  -3  13  -8 9860.38 277.426   1
   3 -13  -8 9311.54 274.804   2
  -8  -5  13 1711.34 65.2946   2
   5 -13  -8 1653.56 115.879   2
  -5  13  -8 1896.37 120.054   1
  -5 -13   8 1670.28 62.0500   2
 -13   8  -5 1794.95 117.286   1
  -5  13  -8 1632.62 82.5509   2
   8  -5 -13 1814.82 98.9370   1
  -8   5 -13 1816.42 119.846   1
   7 -13  -8 27974.9 403.570   1
  -7  13  -8 26833.0 532.937   1
  -8   7 -13 26934.0 549.423   1
  -8  -7  13 27337.2 361.308   2
   7 -13  -8 26863.5 544.912   2
  -7 -13   8 28134.2 408.205   2
  -7  13  -8 27562.4 464.340   2
 -13   8  -7 27793.3 544.855   1
   8  -7 -13 25617.0 457.167   1
   7  13   8 26965.2 394.829   1
  -8   9 -13 2164.31 140.917   1
   9 -13  -8 2386.41 95.2006   1
   9  13   8 2222.93 89.8074   1
   8  -9 -13 2246.51 99.6660   1
  -9  13  -8 2496.84 142.700   1
 -13   8  -9 2533.16 148.706   1
  -8  11 -13 15729.9 419.225   1
   8 -11 -13 16927.8 303.698   1
 -13   8 -11 16256.0 420.036   1
  11 -13  -8 17122.8 329.947   1
 -11  13  -8 16049.5 407.251   1
  -9 -12 -13 21383.4 517.513   2
 -13  -9 -12 21710.1 437.827   1
  -9 -12 -13 21807.0 369.964   1
  -9 -10 -13 21527.7 383.126   1
 -13  -9 -10 21020.9 425.307   1
  -9  -8 -13 11757.4 267.526   1
 -13  -9  -8 11196.5 284.423   1
  -8 -13  -9 11310.4 335.473   2
  -6 -13  -9 15815.5 398.279   2
  -9  -6 -13 15994.1 335.004   1
 -13   9   6 15980.2 356.228   1
 -13  -9  -6 16214.3 352.861   1
 -13  -9  -4 3717.14 156.425   1
  -4 -13  -9 3848.99 177.631   2
  -9  -4 -13 4207.41 157.462   1
 -13   9   4 3891.62 159.472   1
  -9   2  13 7827.93 214.783   2
 -13   9   2 7670.30 232.010   1
  -2 -13  -9 7477.60 249.692   2
  -9  -2 -13 7598.51 226.319   1
 -13   9   0 12815.7 317.549   1
   0 -13  -9 12406.8 328.485   2
  -9   0 -13 12758.1 314.419   1
  -9   2 -13 7367.41 237.409   1
  -9  -2  13 7604.99 185.347   2
 -13   9  -2 7927.42 244.415   1
  -2  13  -9 7542.21 161.924   2
   2 -13  -9 7365.18 245.267   2
  -9   4 -13 3443.19 166.693   1
  -9  -4  13 3695.66 112.655   2
  -4  13  -9 3814.61 117.567   2
 -13   9  -4 3563.74 165.578   1
  -4  13  -9 3478.43 167.229   1
   4 -13  -9 4067.54 177.887   2
  -9  -6  13 16704.7 270.304   2
 -13   9  -6 16868.8 397.895   1
  -6  13  -9 16517.3 315.957   2
  -9   6 -13 16472.4 402.142   1
  -6  13  -9 17114.9 402.070   1
   6 -13  -9 16955.9 252.554   1
  -6 -13   9 16813.9 253.979   2
   9  -6 -13 16681.3 345.081   1
   6 -13  -9 15879.8 397.746   2
  -8 -13   9 11601.8 212.356   2
  -9  -8  13 11659.7 183.191   2
   9  -8 -13 11958.8 268.566   1
   8  13   9 11341.4 218.333   1
   8 -13  -9 11387.4 221.038   1
  -8  13  -9 11173.5 263.136   2
  -9   8 -13 11601.3 335.025   1
  -8  13  -9 11091.4 318.956   1
 -13   9  -8 11605.3 329.983   1
   9 -10 -13 21089.5 382.471   1
 -10  13  -9 20744.0 475.048   1
 -13   9 -10 21523.3 490.464   1
  10  13   9 20800.4 368.169   1
  -9  10 -13 21250.7 494.736   1
  10 -13  -9 21640.1 371.249   1
 -13   9 -12 20686.6 500.568   1
 -12  13  -9 21191.0 493.032   1
  -9  12 -13 20705.7 500.718   1
 -13 -10 -11 10505.3 273.358   1
 -10 -11 -13 10418.3 244.203   1
 -10  -9 -13 13587.4 297.813   1
 -13 -10  -9 12863.2 311.752   1
 -13  10   7 21412.5 429.403   1
 -10  -7 -13 21549.5 414.544   1
  -7 -13 -10 21271.3 487.787   2
 -13 -10  -7 21306.2 422.667   1
 -10  -5 -13 1607.76 99.9253   1
 -13  10   5 1783.72 109.610   1
  -5 -13 -10 1799.25 126.179   2
 -13  10   3 11707.6 294.984   1
  -3 -13 -10 11304.9 323.402   2
 -10  -3 -13 11607.8 291.981   1
  -1 -13 -10 17759.8 418.981   2
 -13  10   1 17683.0 387.819   1
 -10   1  13 18290.0 360.817   2
 -10  -1 -13 17822.4 391.282   1
   1 -13 -10 17775.3 412.622   2
 -13  10  -1 17877.9 396.137   1
 -10   1 -13 17418.9 396.658   1
 -10   3 -13 11485.9 314.706   1
   3 -13 -10 11230.2 316.565   2
  -3  13 -10 11488.3 215.780   2
 -13  10  -3 11123.8 305.811   1
 -10  -3  13 12062.9 245.410   2
  -3  13 -10 10829.7 313.491   1
 -10   5 -13 1978.98 130.188   1
   5 -13 -10 1819.48 126.596   2
 -13  10  -5 2092.30 128.929   1
  -5  13 -10 1921.94 127.374   1
 -10  -5  13 1843.89 77.9946   2
  -5  13 -10 1986.50 85.6081   2
  -7  13 -10 22294.7 395.182   2
   7 -13 -10 22610.6 335.174   1
  -7  13 -10 21500.7 482.558   1
  -7 -13  10 22238.4 306.501   2
 -10   7 -13 21668.2 492.948   1
 -10  -7  13 23246.1 343.081   2
 -13  10  -7 21151.2 479.618   1
   7 -13 -10 22986.8 499.618   2
  10  -9 -13 13796.1 298.884   1
  -9  13 -10 12852.5 361.660   1
 -10  -9  13 13469.9 212.103   2
  -9 -13  10 13631.8 232.281   2
   9 -13 -10 13735.1 257.669   1
 -10   9 -13 13026.1 371.774   1
   9  13  10 12890.7 254.242   1
 -13  10  -9 13157.6 364.441   1
 -13  10 -11 10155.9 328.170   1
 -11  13 -10 10669.8 327.991   1
 -10  11 -13 10063.7 329.416   1
 -11 -12 -13 29413.1 491.150   1
 -13 -11 -12 28222.4 521.044   1
 -11 -10 -13 6415.66 195.030   1
 -13 -11 -10 6267.62 202.596   1
  -8 -13 -11 41384.2 770.916   2
 -13 -11  -8 41133.7 671.469   1
 -11  -8 -13 41663.8 667.408   1
  -6 -13 -11 6748.04 255.118   2
 -11  -6 -13 7296.97 221.248   1
 -13  11   6 7145.46 219.153   1
 -11  -4 -13 10242.6 273.275   1
  -4 -13 -11 9591.86 302.121   2
 -13  11   4 9694.76 263.495   1
 -13  11   2 29090.5 537.620   1
  -2 -13 -11 30025.6 586.987   2
 -11  -2 -13 29296.5 548.095   1
   0 -13 -11 1040.92 97.1837   2
 -11   0  13 956.030 71.3546   2
 -13  11   0 1005.27 87.2689   1
 -11   0 -13 989.055 90.2090   1
  -2  13 -11 30141.1 409.419   2
   2 -13 -11 28912.2 581.533   2
 -13  11  -2 29585.0 561.394   1
 -11   2 -13 29194.6 570.996   1
   4 -13 -11 9714.46 298.583   2
  -4  13 -11 10161.0 199.594   2
 -11   4 -13 9995.78 299.519   1
 -13  11  -4 9879.25 289.556   1
  -4  13 -11 9909.21 304.597   1
 -11  -4  13 9839.61 220.077   2
   6 -13 -11 7308.05 259.583   2
   6 -13 -11 7295.37 131.451   1
  -6  13 -11 7434.53 183.286   2
 -11  -6  13 7220.00 170.561   2
 -11   6 -13 7591.39 263.523   1
  -6  13 -11 7176.79 257.337   1
 -13  11  -6 6864.02 246.323   1
  -8  13 -11 44037.8 642.850   2
   8 -13 -11 42819.6 573.688   1
 -11  -8  13 43368.0 572.142   2
  -8  13 -11 41033.1 751.870   1
  -8 -13  11 39385.9 500.791   2
 -11   8 -13 41416.3 760.028   1
 -13  11  -8 42782.5 757.379   1
 -13  11 -10 5663.00 239.420   1
 -11  10 -13 6516.38 255.927   1
 -10 -13  11 6073.69 133.259   2
 -10  13 -11 6356.90 249.249   1
 -13  11 -12 29168.5 626.807   1
 -11  12 -13 28613.6 623.750   1
 -12  13 -11 28777.1 615.137   1
 -11 -13 -12 2306.18 104.429   1
 -13 -12 -11 2130.48 114.902   1
 -12 -11 -13 2268.85 116.402   1
 -12  -9 -13 434.567 58.9538   1
 -13 -12  -9 329.299 50.9156   1
  -9 -13 -12 338.014 75.2015   2
 -12  -7 -13 1463.77 99.6615   1
 -13  12   7 1486.37 96.9554   1
  -7 -13 -12 1379.34 122.968   2
 -12  -5 -13 8634.13 257.392   1
  -5 -13 -12 9018.37 297.106   2
 -13  12   5 8880.80 249.536   1
 -13  12   3 6849.10 218.901   1
 -12  -3 -13 6850.46 228.618   1
  -3 -13 -12 6676.74 248.709   2
 -13  12   1 662.102 74.6791   1
 -12  -1 -13 610.138 75.3802   1
  -1 -13 -12 608.584 80.5606   2
 -12  -1  13 476.250 53.4763   2
   1 -13 -12 473.996 68.9212   2
 -12   1 -13 512.838 73.3166   1
 -13  12  -1 540.002 70.9701   1
   3 -13 -12 6597.33 243.760   2
 -12   3 -13 6897.86 245.587   1
  -3  13 -12 6790.15 136.773   2
 -13  12  -3 6324.51 227.217   1
  -3  13 -12 6979.23 256.494   1
 -13  12  -5 8469.64 271.317   1
  -5  13 -12 8975.46 297.023   1
 -12   5 -13 8815.98 288.368   1
  -5  13 -12 8666.87 187.504   2
   5 -13 -12 8567.42 284.568   2
  -7  13 -12 1393.80 77.5025   2
   7 -13 -12 1141.53 107.621   2
  -7  13 -12 1204.34 112.991   1
   7 -13 -12 1363.01 55.7402   1
 -12  -7  13 1343.49 69.7055   2
 -13  12  -7 1369.25 112.827   1
 -12   7 -13 962.732 100.056   1
 -12   9 -13 374.738 74.7677   1
  -9  13 -12 372.187 73.0021   1
 -13  12  -9 419.515 70.2259   1
 -13  12 -11 2409.87 160.665   1
 -12  11 -13 2136.63 154.860   1
 -11  13 -12 2229.18 153.652   1
 -13 -12 -13 1314.80 92.3002   1
 -13 -13 -12 1253.92 88.8641   1
 -12 -13 -13 1475.66 89.8192   1
 -10 -13 -13 7349.71 294.110   2
 -13 -10 -13 7606.11 231.877   1
 -10 -13 -13 7630.48 187.822   1
 -13  -8 -13 1969.27 118.128   1
  -8 -13 -13 1985.36 147.046   2
  -8 -13 -13 1969.72 75.6134   1
  -6 -13 -13 834.980 95.2583   2
 -13  -6 -13 695.006 77.3348   1
 -13  13   6 715.296 71.2717   1
 -13  -4 -13 18695.6 415.814   1
  -4 -13 -13 18798.8 456.729   2
 -13  13   4 17796.8 385.472   1
  -2 -13 -13 7904.13 275.670   2
 -13  -2 -13 7628.48 252.698   1
 -13  13   2 7973.53 241.019   1
 -13   0 -13 8279.33 267.146   1
 -13  13   0 8349.36 256.677   1
   0 -13 -13 8243.29 281.037   2
 -13  -2  13 7816.47 219.065   2
   2 -13 -13 7994.53 273.314   2
 -13  13  -2 7623.70 251.873   1
 -13   2 -13 7915.28 269.016   1
  -4  13 -13 18305.6 456.764   1
  -4  13 -13 18632.2 286.747   2
 -13  13  -4 17954.8 421.956   1
 -13  -4  13 17863.0 352.868   2
   4 -13 -13 17523.6 436.220   2
 -13   4 -13 17930.8 438.813   1
 -13   6 -13 836.019 97.9407   1
   6 -13 -13 651.576 33.0133   1
   6 -13 -13 900.543 99.3900   2
  -6  13 -13 599.550 85.0576   1
 -13  13  -6 766.225 88.6159   1
  -6  13 -13 811.844 53.2490   2
  -8  13 -13 1879.92 141.986   1
 -13   8 -13 1751.87 137.711   1
 -13  13  -8 1710.80 131.394   1
 -13  10 -13 7049.83 280.750   1
 -10  13 -13 7403.86 283.930   1
 -13  13 -10 7009.34 271.483   1
 -12  13 -13 1256.04 122.953   1
 -13  13 -12 1117.83 117.649   1
 -13  12 -13 1119.74 116.855   1
   0   0 -14 53210.9 737.470   2
   0 -14   0 53231.9 785.562   2
 -14   0   0 52720.8 827.278   1
  -2  14   0 24235.4 441.735   2
 -14   0  -2 22975.3 466.303   1
  -2 -14   0 24384.4 435.461   2
  -2  14   0 23399.0 383.087   1
   0   2 -14 24202.3 367.760   2
   0  -2 -14 23572.4 414.198   2
 -14   0   2 23071.1 465.158   1
   2 -14   0 22831.9 430.360   2
 -14   0  -4 27371.6 521.766   1
  -4  14   0 27614.7 439.626   1
   0  -4 -14 27263.4 485.561   2
   0   4 -14 28249.3 383.326   2
  -4 -14   0 26646.7 482.398   2
 -14   0   4 27316.1 526.538   1
  -6  14   0 76944.6 1015.89   1
   0  -6 -14 74358.7 1076.67   2
  -6 -14   0 73106.5 1064.98   2
   6  14   0 76263.4 1015.78   1
 -14   0  -6 74889.8 1107.21   1
   0  -8 -14 6394.47 218.292   2
 -14   0  -8 6368.40 223.818   1
  -8  14   0 6190.08 184.900   1
   0  -8 -14 6386.38 151.810   1
   0 -10 -14 6836.77 131.389   1
   0 -10 -14 6686.25 235.680   2
 -10  14   0 6747.27 206.993   1
 -14   0 -10 6410.90 232.940   1
 -12  14   0 584.744 69.9194   1
   0 -12 -14 503.471 78.3235   2
 -14   0 -12 629.065 80.8370   1
 -14  -1 -13 2942.64 160.634   1
  -1 -13 -14 3193.56 175.919   2
 -13  14   1 3166.91 153.523   1
 -11  14   1 28830.5 518.403   1
 -14  -1 -11 28442.2 561.854   1
  -1 -11 -14 28808.0 571.796   2
  -1 -11 -14 28130.0 357.763   1
  -9  14   1 5590.31 178.826   1
  -1  -9 -14 6009.17 217.229   2
  -1  -9 -14 6079.73 134.572   1
 -14  -1  -9 5993.31 219.442   1
   9  14  -1 5795.70 187.794   1
  -1  -7 -14 5647.37 199.140   2
  -1  -7 -14 5893.83 150.954   1
  -7 -14  -1 5538.17 195.307   2
 -14  -1  -7 5871.46 209.868   1
  -7  14   1 5318.27 159.282   1
 -14  -1  -5 39222.7 672.601   1
  -1  -5 -14 38989.6 643.747   2
  -5 -14  -1 38989.0 644.198   2
  -1  -5 -14 40150.5 598.431   1
  -5  14   1 40114.9 576.792   1
 -14  -1  -3 13306.1 328.229   1
  -3  14   1 13296.1 246.877   1
  -1  -3 -14 13036.1 292.045   2
   3 -14   1 13584.5 300.796   2
   1   3 -14 13893.9 224.913   2
  -3 -14  -1 13491.5 308.242   2
 -14   1   3 13262.2 327.857   1
   1 -14   1 13350.6 290.833   2
   1   1 -14 13665.2 247.959   2
  -1  14   1 13350.7 306.243   2
  -1 -14  -1 13053.4 299.363   2
 -14   1   1 13222.7 325.748   1
  -1  14   1 13301.9 241.095   1
 -14  -1  -1 13332.4 325.295   1
  -1  -1 -14 13053.4 275.343   2
  -1   1 -14 13645.8 256.837   2
   1  -1 -14 13090.0 266.923   2
  -1 -14   1 12929.0 284.262   2
  -1  14  -1 12691.1 262.033   1
   1 -14  -1 12989.8 297.384   2
  -1  14  -1 13450.1 293.979   2
 -14   1  -1 12851.5 318.695   1
 -14  -1   1 12768.4 320.798   1
  -3  14  -1 14473.3 283.808   1
   3 -14  -1 14375.0 325.316   2
 -14   1  -3 14290.3 343.563   1
   1  -3 -14 14076.6 299.725   2
  -3 -14   1 14327.7 305.227   2
  -1   3 -14 14660.3 252.543   2
  -3  14  -1 14303.1 312.166   2
 -14  -1   3 14816.5 351.164   1
   1  -5 -14 38782.3 635.984   2
  -1   5 -14 39971.7 516.829   2
 -14   1  -5 38947.6 674.617   1
  -5  14  -1 38492.0 596.690   1
  -5 -14   1 38578.6 623.135   2
   5  14   1 39660.5 573.853   1
   1  -7 -14 5779.26 202.918   2
  -7 -14   1 6003.27 192.864   2
   7  14   1 6029.05 171.035   1
  -7  14  -1 6164.93 183.081   1
 -14   1  -7 5858.21 216.350   1
   1  -9 -14 5819.17 135.115   1
 -14   1  -9 5867.22 218.886   1
   1  -9 -14 5515.07 208.072   2
  -9  14  -1 5642.88 185.151   1
   9  14   1 5417.30 172.827   1
   1 -11 -14 26568.3 344.607   1
   1 -11 -14 28166.7 560.285   2
 -11  14  -1 28101.9 514.865   1
 -14   1 -11 27991.8 554.954   1
   1 -13 -14 3622.11 185.420   2
 -13  14  -1 3750.06 171.301   1
 -14   1 -13 3620.81 181.785   1
 -12  14   2 6137.07 204.034   1
  -2 -12 -14 6223.67 238.960   2
 -14  -2 -12 5981.22 226.962   1
 -10  14   2 8861.55 233.411   1
  -2 -10 -14 8566.04 275.350   2
  -2 -10 -14 9103.78 164.492   1
 -14  -2 -10 8853.09 271.946   1
  -2  -8 -14 384.682 37.6344   1
 -14  -2  -8 424.926 65.1212   1
  -2  -8 -14 432.156 64.9903   2
   8  14  -2 412.547 53.2947   1
  -8  14   2 340.399 45.4068   1
 -14  -2  -6 6013.18 208.521   1
  -2  -6 -14 5827.03 158.820   1
  -6 -14  -2 5423.94 193.850   2
  -2  -6 -14 5660.57 197.980   2
  -6  14   2 6013.84 157.203   1
 -14  -2  -4 3280.91 151.706   1
  -4 -14  -2 3116.69 140.371   2
  -2  -4 -14 3246.57 137.394   2
  -2  -4 -14 3062.76 121.377   1
 -14   2   4 3553.23 157.612   1
  -4  14   2 3076.73 98.3719   1
   2   2 -14 9910.08 186.816   2
  -2  -2 -14 9332.28 241.778   1
   2 -14   2 9372.21 234.933   2
  -2 -14  -2 9482.23 250.614   2
  -2  14   2 9575.77 181.249   1
  -2  -2 -14 9312.25 233.395   2
 -14   2   2 9736.13 269.198   1
 -14  -2  -2 9587.68 265.959   1
   0 -14  -2 33750.0 574.247   2
   2   0 -14 34286.2 507.868   2
  -2   0 -14 33167.7 527.773   2
   0  14   2 34697.1 471.845   1
 -14  -2   0 33872.9 601.407   1
   0 -14   2 34361.0 542.792   2
 -14   2   0 33004.8 594.450   1
   2 -14  -2 9260.84 252.705   2
  -2  14  -2 9795.43 240.346   2
 -14   2  -2 9949.79 272.917   1
  -2  14  -2 9764.86 229.406   1
 -14  -2   2 9504.28 270.619   1
  -2 -14   2 9394.70 228.462   2
  -2   2 -14 9771.45 206.809   2
   2  -2 -14 9888.77 227.048   2
  -4 -14   2 3094.87 125.441   2
  -4  14  -2 3142.77 130.164   2
  -2   4 -14 3183.63 97.0401   2
 -14   2  -4 3281.40 153.938   1
   2  -4 -14 3203.21 131.190   2
   4  14   2 3154.01 98.9666   1
   4 -14  -2 3325.62 147.098   2
  -4  14  -2 3253.84 125.207   1
  -6  14  -2 5533.52 173.999   1
 -14   2  -6 5492.94 206.927   1
  -6 -14   2 5634.85 176.764   2
  -2   6 -14 5839.61 120.084   2
   2  -6 -14 5605.49 188.952   2
   6  14   2 5357.48 147.609   1
  -2   8 -14 390.972 19.5509   2
   2  -8 -14 340.844 57.7474   2
  -8  14  -2 429.002 55.6067   1
 -14   2  -8 375.446 67.8470   1
  -2   8 -14 358.322 19.6561   2
  -8 -14   2 333.442 46.5694   2
   2 -10 -14 9242.79 170.505   1
  10 -14  -2 9131.91 240.244   1
 -14   2 -10 9066.87 282.828   1
 -10  14  -2 9162.71 253.367   1
   2 -10 -14 9022.10 167.544   1
  10  14   2 8838.83 230.937   1
   2 -10 -14 9339.80 281.341   2
   2 -12 -14 5385.19 220.863   2
 -14   2 -12 5451.12 221.080   1
 -12  14  -2 5726.90 209.053   1
 -13  14   3 1689.94 107.553   1
 -14  -3 -13 1774.98 122.689   1
  -3 -13 -14 1819.94 134.512   2
  -3 -11 -14 2577.77 67.9138   1
  -3 -11 -14 2357.72 145.230   2
 -14  -3 -11 2650.60 145.517   1
 -11  14   3 2525.39 120.404   1
  -9  14   3 41497.1 632.907   1
  -3  -9 -14 41274.3 723.189   2
 -14  -3  -9 40818.8 707.213   1
  -3  -9 -14 42359.8 573.930   1
  -3  -7 -14 14111.4 270.918   1
  -7 -14  -3 14242.7 347.794   2
  -7  14   3 14630.2 276.880   1
  -3  -7 -14 13798.0 344.022   2
 -14  -3  -7 14597.4 348.099   1
 -14  -3  -5 76901.4 1126.65   1
  -3  -5 -14 77325.0 1043.45   1
  -3  -5 -14 77176.1 1108.93   2
  -5  14   3 80911.0 998.387   1
  -5 -14  -3 76027.0 1117.85   2
 -14   3   5 75670.4 1126.98   1
  -3 -14  -3 44579.2 727.415   2
 -14   3   3 45874.5 744.196   1
  -3  -3 -14 45542.0 691.272   1
  -3  -3 -14 44774.0 705.621   2
  -3  14   3 46248.8 600.938   1
 -14  -3  -3 45770.3 742.410   1
   3   1 -14 14413.9 266.756   2
  -3  -1 -14 15451.6 313.399   2
  -1 -14  -3 14582.3 337.467   2
   1 -14   3 15064.5 303.019   2
  -3  -1 -14 15548.8 332.032   1
 -14  -3  -1 14954.5 351.269   1
  -1  14   3 15393.1 232.107   1
 -14   3   1 15681.3 356.323   1
   3  -1 -14 14985.0 288.351   2
  -1 -14   3 14694.8 295.215   2
   1  14   3 15564.6 236.362   1
   1 -14  -3 15517.9 343.635   2
 -14   3  -1 15267.5 355.905   1
  -1  14  -3 15453.7 308.698   2
  -3   1 -14 14685.6 340.348   1
 -14  -3   1 15147.6 354.255   1
   3 -14  -3 46600.5 743.858   2
  -3  14  -3 47802.7 704.709   2
  -3 -14   3 46701.1 683.760   2
   3  -3 -14 47322.0 699.201   2
   3  14   3 46190.7 611.679   1
 -14   3  -3 47234.8 764.156   1
  -3  14  -3 46672.9 704.471   1
  -5  14  -3 78394.4 1066.13   2
 -14   3  -5 77501.4 1129.99   1
  -5 -14   3 75958.6 1038.40   2
   5 -14  -3 74593.2 1106.85   2
  -5  14  -3 76898.6 1059.35   1
   5  14   3 76367.1 975.330   1
   3  -5 -14 75624.2 1070.96   2
   7  14   3 13923.8 268.119   1
   3  -7 -14 14441.6 335.438   2
  -7  14  -3 13907.0 313.133   1
 -14   3  -7 13867.1 353.774   1
  -7 -14   3 14229.6 303.539   2
   3  -9 -14 41927.1 712.226   2
   3  -9 -14 42872.7 578.268   1
   9 -14  -3 40404.6 635.838   1
 -14   3  -9 41213.3 726.878   1
  -9  14  -3 41253.0 679.041   1
  -3   9 -14 41403.9 529.780   2
   3 -11 -14 2935.77 158.035   2
   3 -11 -14 2963.27 74.8467   1
 -14   3 -11 2941.43 160.610   1
  11  14   3 2921.30 127.689   1
  -3  11 -14 2809.20 60.9131   2
  11 -14  -3 3139.41 134.159   1
 -11  14  -3 2867.38 143.426   1
   3 -11 -14 2894.53 75.7412   1
  -3  13 -14 2099.57 147.900   1
   3 -13 -14 2288.59 146.673   2
 -13  14  -3 2058.20 131.521   1
 -14   3 -13 1942.29 139.225   1
 -14  -4 -12 6558.28 232.093   1
  -4 -12 -14 6718.53 254.985   2
  -4 -12 -14 6443.60 105.267   1
 -12  14   4 6466.29 204.127   1
 -10  14   4 8768.05 223.696   1
 -14  -4 -10 8939.21 269.356   1
  -4 -10 -14 9136.15 177.712   1
  -4 -10 -14 8303.94 277.285   2
  -8  14   4 3338.55 116.881   1
  -4  -8 -14 3298.88 108.768   1
  -4  -8 -14 3138.49 157.675   2
 -14  -4  -8 3070.77 150.028   1
  -4  -6 -14 45272.6 657.062   1
  -6 -14  -4 42995.7 739.139   2
  -4  -6 -14 43370.3 733.233   2
  -6  14   4 45800.4 620.349   1
 -14  -4  -6 45785.4 741.422   1
  -4  -4 -14 6489.84 184.573   1
  -4  14   4 6580.24 134.423   1
  -4  -4 -14 6384.22 205.548   2
  -4 -14  -4 6604.72 216.038   2
 -14   4   4 6580.94 218.682   1
 -14  -4  -4 6316.25 212.773   1
  -2  14   4 34167.0 436.473   1
 -14  -4  -2 34290.9 599.420   1
  -4  -2 -14 33282.6 561.281   1
  -2 -14  -4 33843.1 592.910   2
 -14   4   2 33501.6 597.623   1
 -14   4   0 19075.1 407.996   1
   4   0 -14 18772.3 330.579   2
   0 -14   4 19668.4 345.521   2
   0 -14  -4 19330.1 400.183   2
   0  14   4 18599.9 249.646   1
 -14  -4   0 18968.6 407.459   1
  -4   0 -14 18896.4 391.300   1
   0  14   4 18924.7 248.481   1
 -14   4  -2 33873.1 603.888   1
   2 -14  -4 33921.8 591.932   2
  -2  14  -4 34248.4 563.381   1
  -2 -14   4 33466.2 519.435   2
  -2  14  -4 34538.6 537.700   2
   4  -2 -14 34287.0 534.232   2
   2  14   4 33998.2 433.806   1
  -4   2 -14 33074.3 594.413   1
   2  14   4 33363.1 431.311   1
  -4  14  -4 5894.26 177.046   2
   4  14   4 6114.02 126.585   1
   4  -4 -14 5952.20 183.465   2
 -14   4  -4 6150.00 217.181   1
  -4 -14   4 6249.96 168.841   2
  -4  14  -4 5830.24 188.752   1
  -4   4 -14 5989.58 214.011   1
   4 -14  -4 6273.42 212.004   2
   4  -6 -14 45870.8 723.979   2
 -14   4  -6 44927.2 763.045   1
  -6  14  -4 45922.1 702.737   2
   6  14   4 46151.9 624.054   1
  -4   6 -14 44488.5 771.460   1
  -6 -14   4 45258.7 674.067   2
  -6  14  -4 44683.3 715.075   1
  -4   8 -14 3693.58 179.485   1
  -8  14  -4 3816.63 158.855   1
   8 -14  -4 4011.04 131.083   1
   8  14   4 3838.77 124.954   1
  -8 -14   4 4139.86 147.194   2
 -14   4  -8 3956.67 181.657   1
   4  -8 -14 4162.35 124.708   1
   4  -8 -14 3929.84 168.091   2
  -4  10 -14 8192.49 159.447   2
  10 -14  -4 8712.46 223.248   1
   4 -10 -14 8933.26 274.483   2
 -14   4 -10 8862.21 282.526   1
   4 -10 -14 8878.23 176.456   1
  -4  10 -14 8717.97 291.321   1
 -10  14  -4 8575.90 256.511   1
  -4  12 -14 6420.91 127.520   2
   4 -12 -14 6138.46 238.127   2
  -4  12 -14 6298.14 253.328   1
   4 -12 -14 6335.31 111.395   1
   4 -12 -14 6132.99 108.506   1
 -12  14  -4 6050.13 224.169   1
 -14   4 -12 6565.81 250.185   1
 -14  -5 -13 32173.5 617.539   1
  -5 -13 -14 33705.9 676.864   2
 -13  14   5 33388.0 580.391   1
 -14  -5 -11 6410.27 225.151   1
  -5 -11 -14 6850.22 144.670   1
  -5 -11 -14 6380.92 246.196   2
 -11  14   5 6858.07 198.218   1
 -14  -5  -9 38143.9 661.178   1
  -5  -9 -14 36780.5 687.496   2
  -5  -9 -14 38891.2 552.124   1
  -9  14   5 37690.9 576.402   1
  -5  -7 -14 4160.17 132.638   1
  -5  -7 -14 4092.17 177.562   2
 -14  -5  -7 3931.90 169.820   1
  -7 -14  -5 3857.18 176.997   2
  -7  14   5 3988.91 117.813   1
  -5  -5 -14 10919.2 249.561   1
 -14   5   5 11201.2 295.505   1
  -5 -14  -5 11001.7 301.370   2
  -5  14   5 11315.0 195.829   1
 -14  -5  -5 11243.1 292.952   1
  -5   3  14 25667.7 455.424   2
 -14  -5  -3 25144.2 492.376   1
  -3  14   5 25443.5 329.083   1
  -3 -14  -5 25948.6 500.550   2
 -14   5   3 25505.0 496.202   1
  -5  -3 -14 25971.5 456.719   1
 -14   5   1 27503.2 522.009   1
  -1 -14  -5 28477.0 525.968   2
  -5   1  14 27266.9 458.979   2
 -14  -5  -1 27660.8 522.011   1
  -5  -1 -14 28440.9 502.163   1
  -5   1 -14 27645.3 512.355   1
   1 -14  -5 27360.3 517.218   2
 -14   5  -1 27544.0 521.905   1
  -1 -14   5 26770.5 433.333   2
  -1  14  -5 27648.0 448.510   2
  -5   3 -14 25530.5 495.677   1
   3 -14  -5 24925.7 488.584   2
  -3 -14   5 24528.8 402.688   2
 -14   5  -3 24425.5 492.693   1
   5  -3 -14 25546.8 444.498   2
   3  14   5 24634.1 314.276   1
  -3  14  -5 25338.4 425.465   2
  -3  14  -5 25359.0 469.285   1
 -14   5  -5 11456.7 315.583   1
  -5  14  -5 11941.8 294.030   1
  -5  14  -5 11901.0 267.598   2
  -5 -14   5 11675.4 244.274   2
   5  -5 -14 11862.7 284.449   2
  -5   5 -14 11571.3 316.289   1
   5  14   5 11704.7 197.716   1
   5 -14  -5 12051.0 315.480   2
  -7  14  -5 4181.70 166.289   1
  -5   7 -14 4229.42 189.909   1
  -7 -14   5 4045.89 137.422   2
 -14   5  -7 4179.26 185.160   1
   7  14   5 4263.00 118.717   1
   5  -7 -14 4291.11 138.177   1
   5  -7 -14 4348.36 172.760   2
   5  -9 -14 35948.4 659.873   2
  -9  14  -5 37314.1 651.344   1
   9 -14  -5 38416.5 575.287   1
   9  14   5 37723.3 562.186   1
  -5   9 -14 34970.3 690.750   1
 -14   5  -9 36534.3 683.813   1
   5  -9 -14 38773.7 549.862   1
  11 -14  -5 6735.92 196.169   1
  -5  11 -14 6618.35 148.218   2
  -5  11 -14 6151.56 249.094   1
  11  14   5 6530.38 188.195   1
 -14   5 -11 6376.66 247.246   1
   5 -11 -14 7074.18 147.905   1
 -11  14  -5 6451.37 229.475   1
   5 -11 -14 6168.06 235.258   2
  -5  13 -14 34169.9 688.786   1
   5 -13 -14 34782.5 671.825   2
 -13  14  -5 32739.4 638.128   1
 -14   5 -13 33643.5 670.654   1
  -6 -12 -14 11847.5 357.578   2
 -12  14   6 11880.2 284.129   1
 -14  -6 -12 12006.9 322.221   1
  -6 -12 -14 12268.8 210.036   1
  -6 -10 -14 6255.68 155.160   1
 -14  -6 -10 5972.52 211.431   1
 -10  14   6 5925.32 173.963   1
  -6 -10 -14 5858.04 233.464   2
 -14  -6  -8 15515.0 363.115   1
  -8 -14  -6 15799.4 394.687   2
  -6  -8 -14 15827.4 392.776   2
  -6  -8 -14 15877.2 301.941   1
  -8  14   6 16329.6 289.110   1
  -6  -6 -14 70706.7 984.004   1
  -6 -14  -6 70801.5 1088.59   2
 -14   6   6 69480.9 1053.59   1
  -6  14   6 73927.6 907.190   1
 -14  -6  -6 71354.4 1052.62   1
 -14   6   4 29861.3 547.783   1
  -6   4  14 28485.1 512.254   2
  -4 -14  -6 29725.1 561.212   2
  -6  -4 -14 29632.0 501.281   1
 -14  -6  -4 29808.9 544.820   1
  -2 -14  -6 6159.24 215.011   2
 -14  -6  -2 6077.83 209.821   1
  -6  -2 -14 6331.07 196.301   1
 -14   6   2 6112.81 210.176   1
 -14   6   0 308.917 58.5615   1
  -6   0 -14 280.374 54.5018   1
  -6   0  14 284.940 39.5962   2
   0 -14  -6 255.919 55.9977   2
  -2 -14   6 6254.41 153.996   2
   2 -14  -6 6024.79 212.516   2
 -14   6  -2 5946.16 214.129   1
  -6  -2  14 6200.88 150.888   2
  -6   2 -14 6176.65 211.702   1
  -2  14  -6 5870.25 162.502   2
   6  -4 -14 30151.2 517.875   2
  -4  14  -6 29700.8 484.438   2
   4 -14  -6 29856.9 563.347   2
  -4 -14   6 30158.5 454.424   2
  -4  14  -6 29469.1 539.532   1
 -14   6  -4 28693.3 561.010   1
  -6   4 -14 28856.6 560.962   1
  -6  14  -6 71929.9 1060.29   1
   6 -14  -6 72382.0 1095.59   2
  -6 -14   6 74119.4 962.839   2
   6  -6 -14 71017.3 1048.65   2
   6  -6 -14 72695.4 997.482   1
  -6  14  -6 70965.9 1004.63   2
  -6   6 -14 72945.3 1106.29   1
   6  14   6 72386.2 903.962   1
 -14   6  -6 72677.9 1096.41   1
   8 -14  -6 16050.3 290.903   1
  -8 -14   6 16507.2 310.753   2
  -8  14  -6 15366.6 367.554   1
 -14   6  -8 16108.1 397.605   1
   8  14   6 15767.1 280.822   1
   6  -8 -14 15986.9 306.488   1
   6  -8 -14 15602.9 371.682   2
  -6   8 -14 15438.0 399.244   1
  -6  10 -14 5248.57 226.589   1
   6 -10 -14 5380.48 215.702   2
   6 -10 -14 5966.71 150.810   1
 -10  14  -6 5503.01 211.030   1
  10 -14  -6 5592.95 166.400   1
 -14   6 -10 5879.85 232.300   1
   6 -12 -14 11640.4 341.446   2
  -6  12 -14 11404.5 225.220   2
 -12  14  -6 11301.5 327.369   1
  -6  12 -14 11211.7 350.443   1
 -14   6 -12 11330.5 343.373   1
  -7 -13 -14 4720.45 224.070   2
 -13  14   7 5099.80 181.352   1
 -14  -7 -13 4958.65 198.304   1
  -7 -13 -14 5250.39 117.974   1
  -7 -11 -14 16308.8 289.654   1
  -7 -11 -14 15996.3 423.312   2
 -11  14   7 16215.9 328.552   1
 -14  -7 -11 16495.4 380.601   1
 -14  -7  -9 14367.6 345.733   1
  -7  -9 -14 14724.4 286.248   1
  -7  -9 -14 13927.7 379.737   2
  -7 -14  -7 25661.1 532.173   2
  -7  -7 -14 25629.0 435.973   1
 -14  -7  -7 24845.0 488.319   1
  -7  -5 -14 4607.60 158.533   1
 -14   7   5 4738.18 185.850   1
 -14  -7  -5 4774.82 182.959   1
  -5 -14  -7 4745.37 198.140   2
  -7  -3 -14 6682.72 204.602   1
  -3 -14  -7 6821.75 232.946   2
 -14  -7  -3 6687.48 217.860   1
  -7   3  14 6485.04 196.925   2
 -14   7   3 6960.25 224.242   1
  -1 -14  -7 8008.26 252.037   2
  -7  -1 -14 8042.31 232.919   1
 -14   7   1 7815.66 242.337   1
  -7  -1  14 7811.12 190.378   2
   1 -14  -7 7985.87 252.140   2
 -14   7  -1 7698.17 243.841   1
  -7   1 -14 7939.96 241.082   1
  -7   3 -14 6668.72 228.314   1
   3 -14  -7 6711.08 229.260   2
  -3  14  -7 6658.72 174.124   2
  -3 -14   7 7187.14 156.946   2
  -7  -3  14 6760.17 156.101   2
  -3  14  -7 6513.71 218.270   1
 -14   7  -3 7204.85 238.626   1
   5 -14  -7 3637.40 172.135   2
  -5 -14   7 4038.49 116.106   2
  -5  14  -7 3909.71 135.663   2
 -14   7  -5 3861.03 178.005   1
  -7  -5  14 4076.13 96.1255   2
  -5  14  -7 4353.94 177.472   1
   7  -5 -14 4125.89 150.050   1
  -7   5 -14 4204.00 185.452   1
  -7  14  -7 24909.0 450.800   2
   7  14   7 26099.1 377.317   1
   7 -14  -7 26026.0 386.472   1
  -7 -14   7 25720.9 411.301   2
  -7   7 -14 26271.5 544.191   1
 -14   7  -7 25257.2 529.509   1
   7  -7 -14 26142.6 446.119   1
  -7  14  -7 25155.5 507.518   1
   7  -9 -14 13944.0 282.135   1
   7  -9 -14 14243.0 364.267   2
  -7   9 -14 14783.2 390.034   1
  -9  14  -7 14312.9 358.974   1
   9 -14  -7 14612.4 277.722   1
  -9 -14   7 14303.3 285.745   2
 -14   7  -9 14108.5 379.096   1
   9  14   7 13869.6 267.758   1
  11 -14  -7 18436.3 347.567   1
 -11  14  -7 17036.9 417.496   1
   7 -11 -14 16928.4 424.665   2
  -7  11 -14 17401.9 445.956   1
 -14   7 -11 17909.1 443.966   1
   7 -11 -14 17468.4 307.435   1
   7 -13 -14 4792.67 221.091   2
  -7  13 -14 4590.86 223.166   1
 -13  14  -7 4818.49 214.688   1
 -14   7 -13 4447.59 216.163   1
  -8 -12 -14 8082.67 296.636   2
 -14  -8 -12 8350.03 257.728   1
  -8 -12 -14 8523.09 188.365   1
  -8 -10 -14 10355.7 231.168   1
 -14  -8 -10 10183.3 283.511   1
  -8  -8 -14 86.5302 29.3126   1
  -8 -14  -8 135.827 51.3249   2
 -14  -8  -8 76.6826 40.8600   1
  -6 -14  -8 28808.9 582.631   2
 -14   8   6 29574.3 545.315   1
  -8  -6 -14 29449.7 501.481   1
 -14  -8  -6 29465.0 542.405   1
  -8  -4 -14 17124.1 358.146   1
  -4 -14  -8 17001.0 408.136   2
 -14  -8  -4 17622.9 383.824   1
 -14   8   4 16926.9 380.040   1
 -14   8   2 43419.8 716.046   1
  -2 -14  -8 42228.2 735.121   2
  -8  -2 -14 42615.5 692.202   1
  -8   2  14 42447.2 664.175   2
  -8   0 -14 366.427 57.2191   1
   0 -14  -8 151.829 46.7328   2
 -14   8   0 173.519 44.2479   1
   2 -14  -8 41214.5 722.035   2
  -2  14  -8 43322.0 599.787   2
 -14   8  -2 40804.1 714.472   1
  -8  -2  14 41596.8 607.981   2
  -8   2 -14 41065.2 709.355   1
  -4  14  -8 16337.6 312.639   2
   4 -14  -8 16693.2 398.169   2
  -4 -14   8 17306.3 273.512   2
 -14   8  -4 16831.3 400.592   1
  -8  -4  14 17249.8 286.557   2
  -4  14  -8 16683.3 390.343   1
  -8   4 -14 16876.2 399.417   1
  -6 -14   8 29008.3 418.972   2
  -6  14  -8 28022.5 473.509   2
  -6  14  -8 27760.8 547.803   1
  -8  -6  14 28726.2 387.035   2
  -8   6 -14 27756.1 566.104   1
 -14   8  -6 28231.1 561.017   1
   8  -6 -14 27328.5 487.062   1
   6 -14  -8 28228.4 565.959   2
   6  14   8 28197.3 375.437   1
   8  -8 -14 207.760 41.1149   1
   8 -14  -8 244.143 31.6907   1
  -8   8 -14 227.779 58.0732   1
  -8 -14   8 254.507 32.3383   2
   8  14   8 180.083 25.8514   1
 -14   8  -8 153.441 58.4429   1
  -8  14  -8 235.047 56.9606   1
   8 -10 -14 9241.86 217.714   1
  -8  10 -14 8809.00 305.382   1
 -10  14  -8 8901.18 288.120   1
  10  14   8 9003.15 208.362   1
 -10 -14   8 9985.49 221.716   2
  10 -14  -8 9945.12 220.778   1
 -14   8 -10 9336.69 305.769   1
  -8  12 -14 8407.06 300.679   1
 -12  14  -8 7701.60 276.596   1
 -14   8 -12 7964.47 289.694   1
 -14  -9 -13 28540.1 549.069   1
  -9 -13 -14 28218.3 639.015   2
  -9 -13 -14 29535.0 447.852   1
  -9 -11 -14 656.262 57.0277   1
 -14  -9 -11 594.224 69.5047   1
  -9 -14  -9 20932.2 501.527   2
 -14  -9  -9 21667.4 442.154   1
  -9  -9 -14 21750.9 398.421   1
  -7 -14  -9 21073.5 491.553   2
  -9  -7 -14 22418.0 417.305   1
 -14   9   7 21622.2 446.553   1
 -14  -9  -7 22153.6 445.866   1
  -5 -14  -9 14370.8 374.863   2
 -14  -9  -5 13873.7 334.011   1
  -9  -5 -14 14124.2 317.205   1
 -14   9   5 13969.9 339.017   1
  -9  -3 -14 20710.4 417.745   1
  -3 -14  -9 20375.2 459.801   2
 -14   9   3 20745.3 431.547   1
  -9   1  14 3979.18 145.699   2
 -14   9   1 4131.40 173.869   1
  -1 -14  -9 3924.46 180.444   2
  -9  -1 -14 4169.35 169.871   1
   1 -14  -9 3660.71 174.523   2
 -14   9  -1 3750.51 167.842   1
  -9   1 -14 3642.61 163.361   1
   3 -14  -9 20064.3 446.960   2
  -9  -3  14 19513.6 340.280   2
  -3  14  -9 19703.3 333.728   2
  -9   3 -14 20041.4 442.408   1
  -3  14  -9 20318.8 447.384   1
 -14   9  -3 20076.1 441.734   1
  -5  14  -9 14566.4 369.667   1
  -5 -14   9 14883.2 231.143   2
   5 -14  -9 14263.3 373.515   2
  -9  -5  14 14763.3 255.851   2
  -5  14  -9 14785.7 288.953   2
 -14   9  -5 15039.6 375.916   1
  -9   5 -14 14301.8 374.070   1
   7 -14  -9 21748.3 498.273   2
  -7  14  -9 23246.5 413.311   2
  -7  14  -9 22589.9 492.413   1
  -7 -14   9 23232.2 345.360   2
  -9  -7  14 22953.4 323.616   2
 -14   9  -7 22575.4 499.100   1
   7 -14  -9 24459.5 343.452   1
   7  14   9 22800.5 331.205   1
  -9   7 -14 22060.4 503.496   1
   9  -7 -14 22343.6 424.958   1
   9  -9 -14 22005.8 397.302   1
  -9  14  -9 20267.6 471.748   1
  -9 -14   9 21910.9 350.124   2
 -14   9  -9 20630.3 485.978   1
  -9   9 -14 21030.9 496.422   1
   9  14   9 20656.7 347.048   1
   9 -14  -9 21504.1 354.371   1
 -14   9 -11 630.889 89.6685   1
  -9  11 -14 763.186 97.3527   1
 -11  14  -9 513.426 77.2192   1
 -14   9 -13 29160.8 633.869   1
 -13  14  -9 29242.0 619.212   1
  -9  13 -14 28807.9 632.035   1
 -10 -12 -14 8670.61 215.178   1
 -14 -10 -12 8811.76 257.805   1
 -10 -10 -14 5776.39 180.840   1
 -14 -10 -10 6081.61 207.335   1
 -10  -8 -14 5041.50 173.774   1
  -8 -14 -10 4823.06 221.920   2
 -14 -10  -8 4811.23 183.268   1
 -14 -10  -6 1723.81 107.753   1
  -6 -14 -10 1586.75 122.902   2
 -10  -6 -14 1748.97 103.629   1
 -14  10   6 1890.15 114.673   1
  -4 -14 -10 653.473 82.4145   2
 -10  -4 -14 678.340 70.5777   1
 -14  10   4 552.725 70.4250   1
 -10  -2 -14 21474.0 441.437   1
 -14  10   2 21193.3 446.680   1
  -2 -14 -10 21420.9 477.424   2
 -14  10   0 192.677 51.0579   1
   0 -14 -10 113.667 46.2245   2
 -10   0  14 143.217 32.4822   2
 -10   0 -14 118.127 40.4429   1
  -2  14 -10 22463.5 342.673   2
 -10   2 -14 21629.5 466.544   1
   2 -14 -10 22134.7 484.901   2
 -14  10  -2 21374.3 465.105   1
   4 -14 -10 580.843 79.4889   2
 -10  -4  14 702.856 51.5996   2
  -4  14 -10 754.401 53.7463   2
 -14  10  -4 833.892 90.0654   1
 -10   4 -14 908.556 90.3239   1
  -4  14 -10 620.116 80.1423   1
   6 -14 -10 1793.02 130.094   2
  -6 -14  10 1709.50 48.1152   2
  -6  14 -10 1853.35 89.4778   2
 -10  -6  14 1748.19 70.1070   2
 -14  10  -6 1652.42 122.878   1
  -6  14 -10 1773.52 124.541   1
 -10   6 -14 1741.48 128.673   1
   8 -14 -10 4788.27 121.478   1
  -8 -14  10 4730.71 109.424   2
  -8  14 -10 5064.54 163.386   2
 -10   8 -14 5011.24 219.749   1
 -14  10  -8 4589.85 207.295   1
  -8  14 -10 4663.05 208.653   1
 -10  14 -10 5211.76 225.908   1
 -10 -14  10 5798.26 141.788   2
 -10  10 -14 5245.83 232.426   1
 -14  10 -10 5268.24 231.466   1
 -10  12 -14 8347.16 306.265   1
 -12  14 -10 8279.43 297.651   1
 -14  10 -12 8444.69 306.658   1
 -11 -13 -14 9620.31 229.673   1
 -14 -11 -13 9826.17 273.594   1
 -14 -11 -11 10561.9 284.342   1
 -11 -11 -14 10721.7 260.970   1
 -11  -9 -14 1912.88 107.257   1
  -9 -14 -11 1889.18 144.665   2
 -14 -11  -9 1647.95 106.644   1
 -14 -11  -7 684.322 73.6694   1
 -11  -7 -14 619.526 65.6384   1
 -14  11   7 760.527 76.7393   1
  -7 -14 -11 691.595 90.6501   2
  -5 -14 -11 8033.58 281.307   2
 -11  -5 -14 7927.54 239.335   1
 -14  11   5 8266.60 247.748   1
  -3 -14 -11 29343.9 597.637   2
 -11  -3 -14 29400.5 548.421   1
 -14  11   3 29606.7 549.431   1
 -14  11   1 2351.53 132.579   1
  -1 -14 -11 2102.54 139.449   2
 -11  -1 -14 2304.83 133.490   1
 -11   1 -14 2342.29 139.349   1
 -11  -1  14 2372.95 111.282   2
   1 -14 -11 2315.98 145.954   2
 -14  11  -1 2462.11 137.741   1
 -11   3 -14 30810.3 608.963   1
   3 -14 -11 30892.4 617.018   2
 -14  11  -3 30668.3 600.000   1
  -3  14 -11 32493.9 456.594   2
  -3  14 -11 31351.2 623.049   1
 -11   5 -14 6118.62 240.189   1
  -5  14 -11 6817.74 251.629   1
 -11  -5  14 6374.79 163.301   2
 -14  11  -5 6577.06 242.669   1
   5 -14 -11 6845.89 253.359   2
  -5  14 -11 6826.81 169.433   2
   7 -14 -11 584.177 80.9534   2
   7 -14 -11 666.953 35.3603   1
 -14  11  -7 574.907 80.3643   1
  -7  14 -11 597.149 83.1770   1
  -7  14 -11 601.842 54.8544   2
 -11   7 -14 487.368 75.5834   1
 -11   9 -14 1797.73 136.891   1
  -9  14 -11 1832.58 134.846   1
 -14  11  -9 1620.29 130.308   1
  -9 -14  11 1799.12 56.4537   2
 -11  14 -11 10760.9 342.361   1
 -11  11 -14 10549.2 349.265   1
 -14  11 -11 10537.0 343.105   1
 -14  11 -13 9782.55 338.091   1
 -13  14 -11 9523.52 335.322   1
 -11  13 -14 9240.18 335.059   1
 -14 -12 -12 18875.3 403.694   1
 -12 -12 -14 19848.3 386.540   1
 -14 -12 -10 14635.0 342.781   1
 -12 -10 -14 14776.4 334.986   1
 -10 -14 -12 14888.2 430.699   2
 -12  -8 -14 6395.09 212.038   1
  -8 -14 -12 6466.31 264.948   2
  -6 -14 -12 5123.74 229.446   2
 -12  -6 -14 5467.99 199.429   1
 -14  12   6 5313.13 193.995   1
  -4 -14 -12 20110.9 481.568   2
 -12  -4 -14 20682.8 437.461   1
 -14  12   4 20105.5 428.349   1
 -12  -2 -14 5831.61 214.247   1
  -2 -14 -12 6003.04 238.432   2
 -14  12   2 6076.94 214.856   1
 -14  12   0 3462.90 165.043   1
   0 -14 -12 3821.81 186.736   2
 -12   0 -14 3708.22 173.718   1
   2 -14 -12 5730.61 231.060   2
 -14  12  -2 5646.33 217.127   1
 -12  -2  14 5594.38 174.418   2
 -12   2 -14 5981.87 229.919   1
   4 -14 -12 20306.9 473.187   2
  -4  14 -12 20918.2 327.406   2
 -14  12  -4 20120.2 459.872   1
  -4  14 -12 19744.1 477.666   1
 -12   4 -14 19389.5 467.803   1
 -12   6 -14 5564.58 233.364   1
  -6  14 -12 5625.88 235.354   1
   6 -14 -12 5536.07 232.615   2
 -14  12  -6 5737.46 230.275   1
  -6  14 -12 5859.62 159.649   2
 -12   8 -14 7023.60 271.408   1
  -8  14 -12 6893.58 269.077   1
 -14  12  -8 7063.52 265.540   1
 -12  10 -14 15154.7 426.019   1
 -10  14 -12 15263.6 422.374   1
 -14  12 -10 14526.9 412.365   1
 -12  12 -14 18470.3 487.678   1
 -12  14 -12 18381.5 480.108   1
 -14  12 -12 17839.0 480.646   1
 -14 -13 -13 1211.10 89.7071   1
 -11 -14 -13 2836.59 186.713   2
 -13 -11 -14 2866.78 137.021   1
 -13  -9 -14 1093.34 89.1481   1
  -9 -14 -13 1344.75 131.230   2
  -7 -14 -13 1021.61 113.487   2
 -14  13   7 1052.51 86.7544   1
 -13  -7 -14 1065.21 91.5258   1
 -13  -5 -14 10669.3 301.086   1
  -5 -14 -13 10418.3 336.189   2
 -14  13   5 10203.1 282.305   1
 -14  13   3 13331.8 333.675   1
  -3 -14 -13 13422.4 380.812   2
 -13  -3 -14 13509.4 350.511   1
 -14  13   1 237.555 53.7543   1
  -1 -14 -13 331.850 66.6501   2
 -13  -1 -14 310.204 61.5091   1
 -13   1 -14 189.159 57.0418   1
 -14  13  -1 301.072 60.6261   1
   1 -14 -13 269.932 60.7067   2
 -14  13  -3 12144.3 339.793   1
   3 -14 -13 12563.5 358.689   2
  -3  14 -13 12198.5 364.829   1
 -13   3 -14 12273.9 350.674   1
 -13   5 -14 10360.2 330.527   1
   5 -14 -13 10662.1 335.478   2
  -5  14 -13 10805.6 342.067   1
 -14  13  -5 10326.6 315.845   1
   7 -14 -13 1158.07 110.610   2
 -13   7 -14 1071.23 110.230   1
 -14  13  -7 974.210 102.173   1
  -7  14 -13 1090.93 113.309   1
 -13   9 -14 1275.14 124.028   1
  -9  14 -13 1296.84 123.703   1
 -14  13  -9 1310.87 121.015   1
 -14  13 -11 2714.25 175.375   1
 -13  11 -14 2621.74 174.931   1
 -11  14 -13 2618.25 173.531   1
 -13  14 -13 1450.23 134.049   1
 -14  13 -13 1694.68 147.407   1
 -13  13 -14 1210.63 124.922   1
 -14 -12 -14 1472.50 101.333   1
 -12 -14 -14 1212.33 130.904   2
 -14 -10 -14 463.387 65.8292   1
 -10 -14 -14 575.446 96.4246   2
 -14  -8 -14 17160.2 401.120   1
  -8 -14 -14 17769.9 474.977   2
 -14  -6 -14 2861.64 153.973   1
  -6 -14 -14 3361.34 189.619   2
 -14  14   6 3162.10 147.818   1
  -4 -14 -14 2955.38 177.082   2
 -14  -4 -14 2956.40 160.533   1
 -14  14   4 3247.16 151.830   1
  -2 -14 -14 18840.2 470.223   2
 -14  -2 -14 18654.8 440.952   1
 -14  14   2 18941.4 419.488   1
 -14  14   0 79011.1 1188.08   1
   0 -14 -14 81939.9 1256.01   2
 -14   0 -14 80511.1 1225.32   1
   2 -14 -14 18279.3 458.607   2
 -14  14  -2 18292.3 429.042   1
 -14   2 -14 17903.4 445.504   1
   4 -14 -14 3403.83 186.687   2
 -14  14  -4 3321.85 174.100   1
  -4  14 -14 3447.71 192.149   1
 -14   4 -14 3385.17 184.596   1
   6 -14 -14 3599.11 193.872   2
 -14  14  -6 3602.97 184.179   1
  -6  14 -14 3299.55 191.882   1
 -14   6 -14 3303.75 189.224   1
 -14   8 -14 17553.6 471.081   1
  -8  14 -14 18429.7 481.237   1
 -14  14  -8 17873.9 457.668   1
 -14  14 -10 453.220 81.0126   1
 -14  10 -14 615.403 93.6405   1
 -10  14 -14 664.428 94.1440   1
 -14  14 -12 1194.49 125.363   1
 -12  14 -14 1078.83 120.371   1
 -14  12 -14 1304.58 133.939   1
 -14  14 -14 27691.4 657.484   1
   1 -15   0 26676.0 479.386   2
  -1 -15   0 26346.1 477.491   2
  -1  15   0 27150.9 425.543   1
   0   1 -15 26677.7 421.993   2
   0  -1 -15 26133.1 444.478   2
 -15   0   1 26130.2 519.185   1
 -15   0  -1 26730.1 518.380   1
 -15   0  -3 24006.2 490.772   1
   0   3 -15 24460.7 366.542   2
  -3 -15   0 23912.3 449.788   2
   0  -3 -15 23931.7 439.013   2
 -15   0   3 24288.6 493.130   1
   3 -15   0 24384.9 460.587   2
  -3  15   0 24478.8 403.442   1
   0   5 -15 55751.1 690.232   2
  -5  15   0 55105.0 782.911   1
 -15   0  -5 56452.5 887.947   1
   0  -5 -15 55340.0 841.652   2
  -5 -15   0 55977.8 842.367   2
 -15   0  -7 2694.51 147.727   1
   0  -7 -15 2744.45 138.774   2
  -7 -15   0 2730.11 134.141   2
  -7  15   0 2763.60 116.743   1
   0  -7 -15 2825.24 108.042   1
 -15   0  -9 35068.8 652.684   1
   0  -9 -15 34782.0 639.659   2
  -9  15   0 34411.3 577.158   1
   9  15   0 33774.1 572.657   1
   0  -9 -15 35864.9 501.502   1
 -11  15   0 19761.0 410.967   1
   0 -11 -15 19410.3 455.345   2
 -15   0 -11 18938.5 451.750   1
   0 -11 -15 19604.9 273.961   1
   0 -11 -15 19905.1 273.074   1
 -15   0 -13 8314.09 283.614   1
   0 -13 -15 8245.91 290.865   2
 -13  15   0 8178.10 256.531   1
 -14  15   1 2723.88 145.322   1
  -1 -14 -15 2927.99 171.986   2
 -15  -1 -14 2762.29 162.750   1
 -12  15   1 44603.1 730.550   1
  -1 -12 -15 44711.1 799.763   2
 -15  -1 -12 44550.3 788.987   1
  -1 -10 -15 5707.32 222.516   2
 -10  15   1 5598.31 186.437   1
 -15  -1 -10 5691.47 222.692   1
  -1 -10 -15 5846.30 128.614   1
  -1  -8 -15 480.840 42.7337   1
  -8 -15  -1 518.710 66.1897   2
   8  15  -1 445.985 51.8771   1
 -15  -1  -8 448.034 67.4285   1
  -8  15   1 471.537 52.6162   1
  -1  -8 -15 438.966 63.9897   2
  -6  15   1 3731.25 126.803   1
  -1  -6 -15 3456.28 155.593   2
  -1  -6 -15 3881.74 131.444   1
  -6 -15  -1 3460.11 152.184   2
 -15  -1  -6 3472.01 163.833   1
   1   4 -15 77928.8 940.576   2
  -4  15   1 74531.0 1000.50   1
  -4 -15  -1 75733.7 1087.32   2
  -1  -4 -15 76089.7 1078.73   2
 -15   1   4 76323.2 1132.39   1
 -15  -1  -4 75786.3 1130.64   1
   2 -15   1 6522.69 199.086   2
   1   2 -15 6764.55 152.973   2
  -1  -2 -15 6610.42 191.204   2
  -2  15   1 6704.43 158.220   1
 -15   1   2 6367.24 223.604   1
  -2 -15  -1 6380.91 202.354   2
 -15  -1  -2 6691.59 226.902   1
   1   0 -15 77555.6 1013.63   2
   0 -15   1 73648.0 1060.92   2
   0 -15  -1 76377.8 1083.04   2
  -1   0 -15 76275.9 1028.18   2
   0  15   1 78490.3 990.654   1
 -15  -1   0 76656.2 1126.44   1
 -15   1   0 76021.0 1122.00   1
   2 -15  -1 6925.00 213.658   2
 -15   1  -2 6845.24 231.570   1
  -2 -15   1 6837.55 201.379   2
  -2  15  -1 6817.87 205.395   2
   1  -2 -15 6563.29 186.137   2
  -1   2 -15 7018.07 166.304   2
  -2  15  -1 6762.12 180.547   1
 -15  -1   2 6542.18 226.806   1
 -15   1  -4 78206.0 1154.50   1
   1  -4 -15 78986.9 1097.74   2
  -4 -15   1 75547.5 1089.91   2
  -1   4 -15 81178.5 989.949   2
  -4  15  -1 78552.7 1057.41   1
   4 -15  -1 76452.4 1123.76   2
  -6  15  -1 3930.40 140.994   1
  -1   6 -15 3659.63 78.8924   2
 -15   1  -6 3729.75 172.189   1
  -6 -15   1 3330.75 142.338   2
   6  15   1 3492.03 123.870   1
   1  -6 -15 3524.85 153.917   2
   1  -8 -15 857.397 55.0715   1
   1  -8 -15 843.866 80.5311   2
 -15   1  -8 865.836 89.0464   1
  -8 -15   1 700.007 70.5064   2
  -8  15  -1 900.407 72.8498   1
   1 -10 -15 4673.39 112.664   1
  10  15   1 4371.57 160.256   1
   1 -10 -15 4576.80 196.939   2
 -15   1 -10 4489.46 199.026   1
 -10  15  -1 4560.63 171.865   1
   1 -12 -15 44987.9 798.084   2
 -12  15  -1 43999.9 743.697   1
 -15   1 -12 45309.5 795.863   1
   1 -14 -15 2883.73 171.341   2
 -14  15  -1 2779.16 152.482   1
 -15   1 -14 2567.53 159.136   1
 -13  15   2 3231.38 150.625   1
  -2 -13 -15 3139.97 178.510   2
 -15  -2 -13 3157.39 170.354   1
 -11  15   2 20282.4 407.524   1
 -15  -2 -11 19567.6 457.068   1
  -2 -11 -15 20995.3 292.545   1
  -2 -11 -15 19914.0 470.272   2
  -2  -9 -15 23515.2 359.120   1
  -9  15   2 21951.3 412.499   1
  -2  -9 -15 22649.7 485.956   2
 -15  -2  -9 22334.5 482.499   1
 -15  -2  -7 6977.61 236.763   1
  -2  -7 -15 6378.56 222.940   2
  -7 -15  -2 6898.52 228.260   2
  -7  15   2 7145.41 183.177   1
  -2  -7 -15 7121.56 177.187   1
 -15  -2  -5 15910.3 379.099   1
  -2  -5 -15 15738.8 356.929   2
  -5 -15  -2 15777.8 362.515   2
 -15   2   5 15798.5 378.740   1
  -2  -5 -15 16656.2 324.028   1
  -5  15   2 16431.2 289.727   1
   2   3 -15 50239.1 648.939   2
  -2  -3 -15 47986.2 753.388   2
  -3  15   2 51467.1 669.133   1
  -3 -15  -2 48297.7 773.885   2
  -2  -3 -15 48992.6 749.567   1
 -15   2   3 48777.3 806.295   1
 -15  -2  -3 48197.1 801.013   1
   2   1 -15 11486.6 230.085   2
  -1 -15  -2 11966.1 295.072   2
   1 -15   2 11810.4 273.641   2
  -2  -1 -15 11989.3 267.074   2
  -1  15   2 11840.9 213.432   1
 -15  -2  -1 11607.7 313.741   1
 -15   2   1 11990.7 315.174   1
 -15   2  -1 12149.1 321.102   1
   1 -15  -2 12587.6 303.181   2
  -1 -15   2 12546.6 276.627   2
   2  -1 -15 12177.5 257.783   2
  -2   1 -15 12017.0 255.884   2
  -1  15  -2 12447.2 284.115   2
  -1  15  -2 12137.3 269.746   1
 -15  -2   1 12274.7 321.871   1
   1  15   2 12700.1 222.694   1
   2  -3 -15 49934.5 747.611   2
  -3 -15   2 50180.0 748.187   2
  -2   3 -15 52542.5 695.743   2
  -3  15  -2 49889.0 763.986   2
 -15   2  -3 49735.3 818.002   1
   3 -15  -2 50294.8 792.905   2
  -3  15  -2 48928.0 735.965   1
 -15   2  -5 15334.4 375.315   1
  -5 -15   2 14967.9 323.360   2
  -2   5 -15 15727.2 257.959   2
   2  -5 -15 15248.9 339.819   2
  -5  15  -2 15399.2 320.886   1
   5  15   2 15666.1 280.741   1
   2  -7 -15 6346.88 215.530   2
  -7 -15   2 5898.47 192.867   2
  -2   7 -15 6485.43 118.389   2
 -15   2  -7 6486.65 234.661   1
  -7  15  -2 6271.33 194.855   1
   7  15   2 6362.09 170.283   1
   2  -9 -15 23083.6 482.769   2
 -15   2  -9 23802.1 503.814   1
  -9  15  -2 22916.0 446.480   1
  -9 -15   2 22386.7 449.895   2
   2 -11 -15 20902.5 479.411   2
 -15   2 -11 21151.5 486.188   1
 -11  15  -2 20885.0 442.163   1
   2 -11 -15 22036.1 309.043   1
   2 -11 -15 21972.6 308.780   1
   2 -13 -15 2663.61 162.376   2
 -13  15  -2 3094.87 157.657   1
 -15   2 -13 3095.32 173.558   1
 -14  15   3 3567.26 164.196   1
  -3 -14 -15 3514.52 193.653   2
 -15  -3 -14 3386.77 178.038   1
 -12  15   3 10499.3 274.596   1
 -15  -3 -12 10318.2 309.254   1
  -3 -12 -15 10042.0 320.464   2
 -10  15   3 8069.20 216.722   1
 -15  -3 -10 7779.03 260.536   1
  -3 -10 -15 7435.64 261.122   2
  -3 -10 -15 8008.25 163.601   1
  -8  15   3 37722.3 572.161   1
  -3  -8 -15 36933.8 667.267   2
  -3  -8 -15 38102.9 549.171   1
  -8 -15  -3 36784.1 668.199   2
 -15  -3  -8 36442.8 664.664   1
  -3  -6 -15 900.821 64.4861   1
 -15  -3  -6 845.244 86.9145   1
  -3  -6 -15 721.570 75.5387   2
  -6  15   3 816.715 53.7556   1
  -6 -15  -3 668.859 74.1062   2
  -4 -15  -3 2107.14 120.954   2
  -3  -4 -15 1999.13 112.589   2
  -4  15   3 1989.99 74.0642   1
  -3  -4 -15 1995.27 102.655   1
 -15   3   4 2044.15 127.506   1
 -15  -3  -4 2081.72 126.194   1
   3   2 -15 1451.45 65.3743   2
  -3  -2 -15 1586.30 95.7374   1
  -3  -2 -15 1510.17 90.9232   2
 -15   3   2 1549.20 111.057   1
 -15  -3  -2 1520.98 107.355   1
  -2  15   3 1620.34 58.0146   1
  -2 -15  -3 1373.92 96.2354   2
 -15   3   0 865.436 85.8963   1
   0 -15  -3 781.396 74.5934   2
   0  15   3 836.499 39.4803   1
  -3   0 -15 723.244 72.2325   1
  -3   0 -15 759.050 62.5911   2
   0 -15   3 810.190 64.8433   2
 -15  -3   0 891.070 84.6916   1
   3   0 -15 749.759 55.2665   2
 -15   3  -2 1260.87 100.699   1
   2 -15  -3 1238.45 93.6631   2
  -2 -15   3 1524.34 84.6147   2
  -2  15  -3 1263.93 81.5927   2
 -15  -3   2 1510.04 110.897   1
   2  15   3 1214.01 51.1947   1
  -3   2 -15 1169.65 94.5285   1
  -2  15  -3 1345.89 84.5691   1
   3  -2 -15 1299.00 77.8607   2
  -4 -15   3 1997.14 98.7737   2
   4 -15  -3 2003.33 120.153   2
   3  -4 -15 1943.27 104.749   2
 -15   3  -4 2012.68 127.596   1
  -4  15  -3 1910.64 102.312   2
   4  15   3 2050.35 74.0485   1
  -4  15  -3 1917.91 102.099   1
   6  15   3 836.778 54.9676   1
   3  -6 -15 835.578 76.9729   2
  -6 -15   3 789.239 66.2416   2
 -15   3  -6 870.342 90.2168   1
  -6  15  -3 882.975 72.5322   1
   8  15   3 37069.6 565.618   1
  -8  15  -3 36721.8 624.512   1
   3  -8 -15 37039.8 652.641   2
 -15   3  -8 37916.3 687.815   1
  -8 -15   3 37435.8 611.435   2
  10 -15  -3 7892.77 213.574   1
 -15   3 -10 7413.93 260.854   1
  -3  10 -15 6922.77 108.417   2
  10  15   3 7415.55 203.777   1
   3 -10 -15 7265.29 250.183   2
   3 -10 -15 7524.20 158.568   1
 -10  15  -3 7408.38 233.279   1
  -3  12 -15 9451.48 322.030   1
   3 -12 -15 9631.21 305.340   2
 -12  15  -3 9696.76 284.136   1
 -15   3 -12 9776.09 311.415   1
   3 -12 -15 9200.95 137.386   1
 -14  15  -3 3515.53 178.549   1
  -3  14 -15 3489.52 196.893   1
   3 -14 -15 3201.74 181.719   2
 -15   3 -14 3829.17 197.204   1
 -15  -4 -13 1982.65 134.292   1
  -4 -13 -15 1995.36 144.012   2
 -13  15   4 1847.46 111.426   1
 -11  15   4 3174.21 133.947   1
  -4 -11 -15 3300.48 176.317   2
  -4 -11 -15 3376.23 91.7140   1
 -15  -4 -11 3163.35 162.473   1
  -9  15   4 18124.0 342.043   1
 -15  -4  -9 17845.0 412.492   1
  -4  -9 -15 17718.3 424.647   2
  -4  -9 -15 18082.5 313.527   1
  -4  -7 -15 14088.3 281.661   1
  -7  15   4 14347.9 270.574   1
  -7 -15  -4 13664.0 353.594   2
 -15  -4  -7 14732.2 358.035   1
  -4  -7 -15 13946.3 354.476   2
  -5  15   4 12256.9 218.223   1
  -5 -15  -4 11942.1 315.367   2
  -4  -5 -15 11910.6 307.751   2
 -15   4   5 12311.9 322.764   1
  -4  -5 -15 11905.0 269.392   1
 -15  -4  -5 12378.1 320.658   1
  -3 -15  -4 9918.90 279.857   2
 -15   4   3 10020.8 287.110   1
  -4  -3 -15 9945.13 251.968   1
  -4  -3 -15 9493.08 258.486   2
  -3  15   4 10305.5 171.936   1
 -15  -4  -3 10188.4 286.025   1
   1 -15   4 66326.4 913.569   2
  -4  -1 -15 65683.3 965.438   1
  -1  15   4 65621.6 789.204   1
  -1 -15  -4 65395.4 984.286   2
 -15  -4  -1 64108.6 994.235   1
 -15   4   1 65269.0 995.638   1
  -1 -15   4 62632.7 873.713   2
   1 -15  -4 63515.9 956.261   2
   4  -1 -15 63202.9 871.545   2
 -15  -4   1 61092.9 967.928   1
   1  15   4 63582.9 757.850   1
  -4   1 -15 62611.9 950.885   1
  -1  15  -4 63857.3 890.196   2
 -15   4  -1 62374.8 968.523   1
   1  15   4 62350.0 758.540   1
   3  15   4 9615.37 162.655   1
   4  -3 -15 9502.89 237.432   2
   3 -15  -4 9422.68 273.419   2
 -15   4  -3 9483.60 282.761   1
  -3  15  -4 9493.14 249.360   1
  -3 -15   4 9546.02 222.602   2
  -3  15  -4 9791.87 240.478   2
  -4   3 -15 9588.40 280.404   1
   5 -15  -4 11623.2 316.828   2
   4  -5 -15 11603.3 285.979   2
  -5  15  -4 11649.4 276.185   2
   5  15   4 11803.6 211.393   1
  -5 -15   4 12037.7 261.676   2
 -15   4  -5 11789.3 325.311   1
  -4   5 -15 11410.9 321.737   1
  -5  15  -4 12151.2 290.779   1
   4  -7 -15 12052.7 309.302   2
 -15   4  -7 11952.7 334.327   1
  -7 -15   4 11543.5 271.101   2
  -7  15  -4 12091.3 299.404   1
   7  15   4 12696.3 239.544   1
  -4   7 -15 11885.9 339.159   1
   4  -9 -15 19000.7 434.345   2
  -9  15  -4 19653.0 418.698   1
 -15   4  -9 20359.6 463.770   1
  -9 -15   4 19751.8 392.116   2
   4  -9 -15 19810.2 335.825   1
  -4   9 -15 19641.9 469.982   1
  -4  11 -15 3575.18 83.6729   2
  11 -15  -4 3684.56 145.424   1
  -4  11 -15 3660.78 192.141   1
 -15   4 -11 3534.05 182.681   1
   4 -11 -15 3345.05 171.849   2
 -11  15  -4 3263.25 160.296   1
   4 -11 -15 3463.93 96.0156   1
   4 -13 -15 1838.78 137.550   2
  -4  13 -15 1898.06 144.718   1
 -13  15  -4 2088.79 133.694   1
 -15   4 -13 1997.86 144.380   1
 -15  -5 -14 16423.5 410.892   1
 -14  15   5 16787.6 379.101   1
  -5 -14 -15 16585.6 452.702   2
  -5 -12 -15 16324.7 431.082   2
 -15  -5 -12 15559.1 389.526   1
 -12  15   5 16358.4 349.727   1
  -5 -12 -15 16189.8 248.726   1
 -15  -5 -10 8105.28 259.729   1
  -5 -10 -15 8279.73 181.952   1
  -5 -10 -15 8448.73 284.744   2
 -10  15   5 8105.63 209.609   1
 -15  -5  -8 22652.9 470.952   1
  -5  -8 -15 21832.3 480.427   2
  -8 -15  -5 21862.5 484.655   2
  -5  -8 -15 22420.9 383.394   1
  -8  15   5 21967.6 371.111   1
  -6 -15  -5 9582.26 287.323   2
  -5  -6 -15 9605.39 230.862   1
  -5  -6 -15 8992.34 273.487   2
 -15   5   6 9924.21 285.518   1
  -6  15   5 9992.42 189.193   1
 -15  -5  -6 8968.57 273.092   1
  -4 -15  -5 21375.0 458.377   2
  -5  -4 -15 21620.2 406.581   1
 -15   5   4 21076.5 451.309   1
 -15  -5  -4 21309.1 451.593   1
  -4  15   5 21752.0 301.987   1
  -5  -2 -15 7091.41 213.785   1
  -2 -15  -5 7052.01 232.547   2
 -15  -5  -2 6754.93 229.545   1
 -15   5   2 6894.47 232.285   1
 -15   5   0 57564.4 912.257   1
   0 -15  -5 57489.9 903.001   2
  -5   0 -15 58198.1 887.048   1
 -15  -5   0 57659.8 912.147   1
   0 -15   5 58608.1 810.598   2
   5  -2 -15 6863.73 191.811   2
  -2 -15   5 6783.08 175.910   2
   2 -15  -5 7088.00 232.947   2
 -15   5  -2 6948.40 235.973   1
  -2  15  -5 6782.10 213.710   1
  -2  15  -5 7125.66 191.218   2
  -5   2 -15 7167.68 233.113   1
   5  -4 -15 20710.6 411.027   2
 -15   5  -4 20840.8 460.421   1
   4 -15  -5 21459.0 456.786   2
  -4  15  -5 20762.3 391.804   2
   4  15   5 21841.0 293.788   1
  -5   4 -15 21191.6 463.408   1
  -4  15  -5 20655.6 424.140   1
  -4 -15   5 21255.6 369.231   2
   6 -15  -5 9709.98 289.165   2
   5  -6 -15 9818.25 269.121   2
  -6 -15   5 9629.40 226.196   2
 -15   5  -6 9741.12 297.268   1
   6  15   5 9971.78 186.236   1
  -5   6 -15 9257.35 293.892   1
  -6  15  -5 9385.43 262.624   1
   5  -8 -15 20581.8 447.582   2
  -8  15  -5 21025.5 440.525   1
  -8 -15   5 21971.0 395.407   2
   8  15   5 20761.2 353.502   1
 -15   5  -8 21636.1 482.379   1
   5  -8 -15 21388.0 372.454   1
  -5   8 -15 20828.0 484.551   1
 -10  15  -5 7568.01 249.036   1
  -5  10 -15 7814.99 282.842   1
 -15   5 -10 7757.07 272.600   1
  10 -15  -5 8392.81 213.221   1
   5 -10 -15 7441.91 257.680   2
   5 -10 -15 7937.93 177.781   1
   5 -12 -15 16183.5 417.400   2
  -5  12 -15 16004.8 436.988   1
 -15   5 -12 16227.1 427.555   1
 -12  15  -5 16275.4 401.081   1
  -5  14 -15 16569.8 459.202   1
 -14  15  -5 16214.6 417.369   1
   5 -14 -15 16550.1 445.050   2
 -15   5 -14 16995.6 451.493   1
  -6 -13 -15 31376.7 663.112   2
 -15  -6 -13 31067.7 604.719   1
 -13  15   6 31655.4 555.949   1
 -15  -6 -11 6984.71 239.321   1
  -6 -11 -15 6452.72 256.163   2
 -11  15   6 6870.97 196.235   1
  -6 -11 -15 6855.34 159.193   1
  -6  -9 -15 5436.86 155.664   1
  -6  -9 -15 5119.19 215.865   2
  -9 -15  -6 5218.37 220.534   2
  -9  15   6 5538.60 155.598   1
 -15  -6  -9 5354.88 207.214   1
  -7  15   6 10285.1 197.373   1
  -7 -15  -6 10058.6 303.608   2
  -6  -7 -15 9962.29 297.871   2
  -6  -7 -15 9714.63 232.646   1
 -15  -6  -7 9189.49 277.062   1
  -5 -15  -6 11624.9 322.208   2
  -6  -5 -15 11630.0 271.701   1
 -15   6   5 11461.2 310.769   1
 -15  -6  -5 11395.8 308.405   1
  -3 -15  -6 13606.9 346.772   2
  -6   3  15 12714.8 298.981   2
  -6  -3 -15 13951.8 313.695   1
 -15  -6  -3 13618.5 339.065   1
 -15   6   3 13756.3 341.943   1
 -15   6   1 5085.67 199.970   1
  -6  -1 -15 4897.60 181.742   1
  -1 -15  -6 5119.58 200.112   2
 -15  -6  -1 5056.24 197.712   1
  -1 -15   6 5255.47 146.661   2
 -15   6  -1 4955.44 197.435   1
  -6   1 -15 4981.91 191.124   1
  -6  -1  15 4769.52 142.464   2
   1 -15  -6 4890.84 196.058   2
  -3 -15   6 13589.9 257.860   2
  -3  15  -6 12871.8 276.553   2
  -6   3 -15 12820.5 338.404   1
 -15   6  -3 12710.0 340.583   1
  -3  15  -6 13404.9 323.858   1
   3 -15  -6 13314.2 340.802   2
   6  -5 -15 11907.3 295.290   2
   5 -15  -6 12168.1 329.745   2
  -5 -15   6 12008.8 245.147   2
   5  15   6 11654.9 181.474   1
  -5  15  -6 11608.9 303.580   1
 -15   6  -5 11652.3 329.487   1
  -6   5 -15 11634.0 329.728   1
  -5  15  -6 12535.0 277.882   2
  -7 -15   6 9507.55 217.801   2
 -15   6  -7 9083.42 291.382   1
   6  -7 -15 8565.43 260.988   2
   6  -7 -15 9100.52 225.929   1
  -7  15  -6 9237.63 268.642   1
   7  15   6 9211.16 180.752   1
  -6   7 -15 8925.52 292.615   1
  -9  15  -6 5487.42 207.397   1
  -6   9 -15 5585.64 234.671   1
 -15   6  -9 5305.67 223.244   1
  -9 -15   6 5250.99 167.054   2
   6  -9 -15 5343.11 211.837   2
   9 -15  -6 5666.85 156.995   1
   9  15   6 5330.05 147.214   1
   6  -9 -15 5651.25 158.356   1
   6 -11 -15 6518.83 250.731   2
 -11  15  -6 6852.58 245.515   1
 -15   6 -11 7400.89 270.558   1
  -6  11 -15 7097.16 275.779   1
   6 -13 -15 30942.1 644.194   2
 -13  15  -6 30631.3 621.368   1
 -15   6 -13 30808.6 652.850   1
  -6  13 -15 32186.9 671.380   1
  -7 -14 -15 10738.7 363.072   2
 -14  15   7 11122.3 289.118   1
 -15  -7 -14 10674.3 312.920   1
 -15  -7 -12 34126.1 633.820   1
  -7 -12 -15 33433.5 692.211   2
 -12  15   7 34226.2 569.739   1
  -7 -12 -15 34802.5 496.376   1
 -15  -7 -10 22422.3 476.284   1
  -7 -10 -15 23035.7 389.826   1
  -7 -10 -15 22944.1 522.217   2
 -10  15   7 23393.8 403.605   1
  -7  -8 -15 13682.0 370.002   2
  -8 -15  -7 13721.2 373.700   2
  -7  -8 -15 13827.4 286.441   1
 -15  -7  -8 13275.4 339.414   1
 -15   7   6 1247.55 100.093   1
  -6 -15  -7 1050.53 97.1557   2
 -15  -7  -6 1248.86 99.9184   1
  -7  -6 -15 1151.06 79.1610   1
  -4 -15  -7 37561.4 689.633   2
 -15  -7  -4 37920.6 665.505   1
 -15   7   4 38349.8 669.435   1
  -7  -4 -15 38231.6 624.211   1
  -2 -15  -7 2046.64 128.531   2
  -7   2  15 1997.77 104.303   2
  -7  -2 -15 2085.28 115.355   1
 -15  -7  -2 1806.70 118.275   1
 -15   7   2 2039.88 125.335   1
 -15   7   0 18421.8 420.648   1
  -7   0 -15 19019.2 408.911   1
   0 -15  -7 19317.0 432.635   2
  -2 -15   7 1814.89 76.9371   2
   2 -15  -7 1569.65 115.530   2
 -15   7  -2 1658.53 116.799   1
  -7  -2  15 1705.45 78.5108   2
  -2  15  -7 1822.24 85.7749   2
  -7   2 -15 1868.67 120.683   1
  -4  15  -7 35779.0 639.448   1
   4 -15  -7 35067.4 659.569   2
  -7   4 -15 35472.9 662.201   1
  -4  15  -7 35977.3 564.393   2
 -15   7  -4 35792.0 665.768   1
  -4 -15   7 37857.0 528.113   2
  -6  15  -7 1087.13 94.1304   1
  -6  15  -7 1102.27 75.9825   2
  -6 -15   7 1042.83 63.2892   2
   6 -15  -7 1032.70 101.116   2
  -7   6 -15 996.641 96.6155   1
 -15   7  -6 1034.63 98.8750   1
   6  15   7 1053.69 41.1724   1
   7  -6 -15 1145.33 79.1478   1
   8  15   7 14266.4 250.901   1
  -7   8 -15 13834.1 383.238   1
  -8 -15   7 14542.3 283.052   2
  -8  15  -7 14011.9 359.203   1
 -15   7  -8 14068.4 380.215   1
   7  -8 -15 14810.9 300.966   1
   7  -8 -15 14448.7 360.941   2
   7 -10 -15 21795.2 492.266   2
 -10  15  -7 23000.1 492.814   1
   7 -10 -15 23244.8 389.781   1
  -7  10 -15 21864.8 521.356   1
 -10 -15   7 22576.5 407.425   2
 -15   7 -10 22279.8 514.767   1
  10 -15  -7 22319.4 392.649   1
  -7  12 -15 32113.9 674.821   1
   7 -12 -15 31830.0 649.818   2
 -15   7 -12 33201.1 672.648   1
 -12  15  -7 32956.4 641.492   1
  -7  14 -15 10517.2 358.855   1
   7 -14 -15 10542.4 348.868   2
 -14  15  -7 10478.7 335.737   1
 -15   7 -14 11311.0 365.210   1
 -15  -8 -13 18481.1 424.862   1
  -8 -13 -15 18177.6 481.923   2
 -15  -8 -11 5736.59 214.971   1
  -8 -11 -15 6261.70 167.291   1
  -8 -11 -15 6045.11 253.266   2
  -9 -15  -8 16999.1 440.986   2
  -8  -9 -15 16792.9 334.926   1
 -15  -8  -9 17253.3 394.127   1
  -7 -15  -8 8659.08 289.326   2
  -8  -7 -15 8684.72 227.193   1
 -15  -8  -7 8517.54 259.815   1
  -5 -15  -8 8039.19 271.181   2
 -15  -8  -5 7362.11 239.269   1
 -15   8   5 7846.68 248.435   1
  -8  -5 -15 7313.44 216.877   1
  -8  -3 -15 8486.49 241.282   1
  -3 -15  -8 8186.13 269.564   2
 -15  -8  -3 7615.12 247.010   1
 -15   8   3 8022.87 254.878   1
  -1 -15  -8 9741.37 294.770   2
  -8   1  15 9079.64 234.331   2
  -8  -1 -15 9590.74 269.819   1
 -15   8   1 9688.98 282.750   1
  -8  -1  15 10669.8 237.835   2
 -15   8  -1 10649.8 302.784   1
  -8   1 -15 10465.2 295.406   1
   1 -15  -8 10885.8 311.248   2
   3 -15  -8 7724.68 262.193   2
 -15   8  -3 8226.85 268.032   1
  -8  -3  15 7954.77 182.081   2
  -3  15  -8 8238.60 261.078   1
  -3  15  -8 8073.76 195.433   2
  -8   3 -15 7757.20 258.467   1
  -5  15  -8 8320.22 211.180   2
  -5 -15   8 8645.27 176.826   2
 -15   8  -5 8636.70 280.848   1
  -8  -5  15 8715.33 165.564   2
  -5  15  -8 7975.96 262.554   1
  -8   5 -15 8291.99 277.109   1
   5 -15  -8 8339.68 276.748   2
  -7  15  -8 8825.51 274.768   1
   7  15   8 8286.11 154.889   1
   7 -15  -8 8357.58 283.704   2
  -8   7 -15 8321.18 286.505   1
  -7  15  -8 8633.64 227.241   2
  -7 -15   8 8672.97 186.150   2
 -15   8  -7 8479.48 284.480   1
   8  -7 -15 8391.10 227.663   1
   8  -9 -15 18109.5 347.035   1
   9 -15  -8 17391.1 308.262   1
  -8   9 -15 17850.1 449.474   1
  -9 -15   8 17367.1 318.929   2
  -9  15  -8 17212.7 422.457   1
 -15   8  -9 17115.6 438.287   1
 -11  15  -8 5270.71 222.989   1
  -8  11 -15 5550.40 245.774   1
 -11 -15   8 5716.59 169.265   2
 -15   8 -11 5226.63 233.611   1
  -8  13 -15 17566.0 478.435   1
 -15   8 -13 18860.6 486.454   1
 -13  15  -8 18408.9 462.396   1
  -9 -14 -15 72.9586 60.2841   2
 -15  -9 -14 236.990 55.4208   1
  -9 -12 -15 10897.8 361.937   2
  -9 -12 -15 11244.1 238.366   1
 -15  -9 -12 10872.6 304.248   1
  -9 -10 -15 3602.68 136.857   1
 -10 -15  -9 3922.27 203.714   2
 -15  -9 -10 3781.61 170.295   1
  -9  -8 -15 5109.72 171.277   1
  -8 -15  -9 5072.85 225.507   2
 -15  -9  -8 4714.63 191.031   1
  -6 -15  -9 1738.05 128.398   2
 -15   9   6 1556.38 110.514   1
  -9  -6 -15 1809.54 103.903   1
 -15  -9  -6 1709.57 113.384   1
  -4 -15  -9 29659.8 600.976   2
 -15  -9  -4 29809.3 564.539   1
 -15   9   4 29965.7 567.566   1
  -9  -4 -15 30511.0 541.696   1
 -15   9   2 10937.8 304.998   1
  -9  -2 -15 10583.7 287.339   1
  -2 -15  -9 11426.8 328.871   2
   0 -15  -9 9462.90 294.209   2
  -9   0 -15 9471.01 275.763   1
 -15   9   0 9404.41 283.984   1
 -15   9  -2 10516.6 308.314   1
  -9   2 -15 10917.9 310.212   1
  -2  15  -9 11082.9 221.799   2
   2 -15  -9 10681.9 316.666   2
  -9  -2  15 10568.0 234.279   2
   4 -15  -9 31517.1 620.833   2
  -9  -4  15 32066.1 476.400   2
 -15   9  -4 32177.8 620.915   1
  -4  15  -9 32130.3 498.523   2
  -4  15  -9 32108.4 616.478   1
  -9   4 -15 31832.0 618.071   1
   6 -15  -9 1425.53 116.576   2
  -6  15  -9 1429.06 111.653   1
  -9  -6  15 1643.82 59.7550   2
 -15   9  -6 1394.66 115.644   1
  -6 -15   9 1596.91 61.6429   2
  -9   6 -15 1564.85 122.890   1
  -6  15  -9 1597.94 87.9952   2
  -8 -15   9 4732.14 122.548   2
   8 -15  -9 4013.05 110.031   1
 -15   9  -8 4216.99 201.885   1
  -8  15  -9 4093.30 191.430   1
  -9   8 -15 4417.52 208.526   1
 -10  15  -9 3629.10 184.110   1
 -10 -15   9 3685.62 121.073   2
 -15   9 -10 3723.99 195.879   1
  -9  10 -15 3382.08 188.956   1
 -12  15  -9 11195.0 347.235   1
 -15   9 -12 11200.8 362.317   1
  -9  12 -15 11188.7 363.497   1
 -14  15  -9 231.217 62.7523   1
  -9  14 -15 116.729 58.8281   1
 -15   9 -14 167.558 65.1146   1
 -10 -13 -15 1472.80 136.648   2
 -15 -10 -13 1657.72 114.436   1
 -10 -11 -15 9086.57 228.254   1
 -15 -10 -11 8829.00 266.506   1
 -10  -9 -15 5516.80 182.848   1
  -9 -15 -10 5266.50 239.667   2
 -15 -10  -9 5426.12 203.237   1
  -7 -15 -10 9346.97 313.416   2
 -10  -7 -15 9404.72 254.359   1
 -15  10   7 9097.76 271.704   1
 -15 -10  -7 9283.77 270.399   1
  -5 -15 -10 16842.7 428.156   2
 -10  -5 -15 16729.3 367.916   1
 -15  10   5 16081.3 381.691   1
  -3 -15 -10 7262.47 261.464   2
 -10  -3 -15 7142.02 230.293   1
 -15  10   3 7059.92 236.653   1
 -15  10   1 9054.90 276.497   1
 -10  -1 -15 8644.04 265.849   1
  -1 -15 -10 9386.58 297.563   2
   1 -15 -10 8169.90 278.627   2
 -15  10  -1 8400.82 269.025   1
 -10   1 -15 8391.89 267.262   1
  -3  15 -10 6757.17 248.485   1
   3 -15 -10 6781.92 251.341   2
 -15  10  -3 6984.95 249.914   1
 -10  -3  15 6786.93 177.142   2
 -10   3 -15 6782.27 244.914   1
  -3  15 -10 6991.35 165.324   2
  -5  15 -10 16006.7 406.320   1
   5 -15 -10 16152.8 412.530   2
  -5  15 -10 16765.4 310.891   2
 -10  -5  15 16008.5 281.803   2
 -10   5 -15 15786.4 408.284   1
 -15  10  -5 15809.7 405.490   1
  -7 -15  10 9667.66 165.925   2
 -10   7 -15 9300.28 309.128   1
 -15  10  -7 9576.74 309.813   1
  -7  15 -10 9502.80 303.356   1
   7 -15 -10 9191.37 307.695   2
  -9 -15  10 6019.13 138.941   2
  -9  15 -10 6179.49 245.387   1
 -10   9 -15 6020.21 252.994   1
 -15  10  -9 5670.88 240.509   1
 -11  15 -10 9001.60 310.095   1
 -11 -15  10 9344.18 203.447   2
 -10  11 -15 9153.06 323.974   1
 -15  10 -11 8890.03 316.538   1
 -13  15 -10 1260.51 121.663   1
 -10  13 -15 1380.93 132.534   1
 -15  10 -13 1504.21 133.347   1
 -11 -14 -15 119.470 62.0034   2
 -15 -11 -14 104.558 44.7705   1
 -15 -11 -12 2961.83 150.030   1
 -11 -12 -15 2800.17 121.627   1
 -11 -10 -15 23842.6 448.082   1
 -10 -15 -11 23684.8 569.778   2
 -15 -11 -10 23316.5 478.296   1
  -8 -15 -11 521.640 83.1102   2
 -15 -11  -8 557.878 71.6329   1
  -6 -15 -11 6346.07 256.692   2
 -11  -6 -15 6383.96 213.875   1
 -15  11   6 6441.38 222.600   1
  -4 -15 -11 13934.1 387.611   2
 -11  -4 -15 13989.5 340.567   1
 -15  11   4 13656.3 346.820   1
  -2 -15 -11 1258.80 113.112   2
 -15  11   2 1077.59 96.1091   1
 -11  -2 -15 1267.95 101.066   1
 -11   0 -15 71233.6 1073.30   1
 -15  11   0 68690.9 1062.09   1
   0 -15 -11 68732.0 1103.53   2
   2 -15 -11 1167.04 106.191   2
 -11   2 -15 989.092 95.8427   1
 -15  11  -2 1091.87 100.737   1
   4 -15 -11 13598.0 376.830   2
 -11  -4  15 13222.2 269.482   2
 -11   4 -15 13570.7 372.114   1
  -4  15 -11 13895.4 258.161   2
 -15  11  -4 13201.3 364.396   1
  -4  15 -11 13175.0 373.235   1
   6 -15 -11 6988.98 265.311   2
  -6  15 -11 7301.98 186.406   2
 -11   6 -15 6208.05 252.789   1
  -6  15 -11 6912.76 259.470   1
 -15  11  -6 6535.63 252.779   1
  -8  15 -11 697.075 90.4948   1
 -11   8 -15 637.548 87.1121   1
 -11  10 -15 22586.4 541.611   1
 -10  15 -11 22296.3 527.684   1
 -15  11 -10 22864.1 542.125   1
 -12  15 -11 3005.76 182.224   1
 -11  12 -15 3063.28 188.252   1
 -15  11 -12 3368.60 198.473   1
 -15  11 -14-43.9647 62.1069   1
 -14  15 -11-52.9550 67.8335   1
 -11  14 -15 51.4580 54.9891   1
 -15 -12 -13 383.593 62.5470   1
 -11 -15 -12 7820.73 311.661   2
 -15 -12 -11 7538.78 241.160   1
 -12 -11 -15 7765.85 224.924   1
 -12  -9 -15 28631.4 526.664   1
  -9 -15 -12 28557.0 636.316   2
 -15 -12  -9 28301.4 540.051   1
  -7 -15 -12 21160.6 517.782   2
 -15  12   7 20653.2 445.097   1
 -12  -7 -15 21565.5 445.605   1
  -5 -15 -12 11281.6 353.890   2
 -12  -5 -15 11589.0 310.583   1
 -15  12   5 11467.2 311.894   1
  -3 -15 -12 28641.5 602.605   2
 -12  -3 -15 28252.3 554.695   1
 -15  12   3 28507.3 551.106   1
  -1 -15 -12 11043.3 342.177   2
 -12  -1 -15 11919.2 328.675   1
 -15  12   1 11100.0 316.892   1
 -12   1 -15 12168.4 340.826   1
   1 -15 -12 12185.7 356.635   2
 -15  12  -1 11774.0 332.346   1
   3 -15 -12 29128.7 603.987   2
 -15  12  -3 28704.2 585.838   1
  -3  15 -12 28491.9 603.016   1
 -12   3 -15 29119.8 598.051   1
  -5  15 -12 12250.6 363.433   1
 -12   5 -15 11661.5 353.963   1
 -15  12  -5 11545.4 344.088   1
   5 -15 -12 12215.0 363.053   2
  -7  15 -12 19425.9 485.956   1
 -12   7 -15 20502.8 496.402   1
   7 -15 -12 19781.2 493.814   2
 -15  12  -7 20789.7 489.813   1
 -12   9 -15 29547.8 640.914   1
  -9  15 -12 28905.1 626.106   1
 -15  12  -9 29179.1 625.049   1
 -12  11 -15 8019.70 309.252   1
 -11  15 -12 7820.55 298.812   1
 -15  12 -11 7876.55 304.966   1
 -15  12 -13 260.357 71.3086   1
 -13  15 -12 227.755 68.3246   1
 -12  13 -15 308.540 78.4684   1
 -13 -14 -15 1215.64 135.944   2
 -12 -15 -13 3046.79 200.289   2
 -15 -13 -12 3045.84 147.996   1
 -13 -12 -15 3200.85 142.087   1
 -10 -15 -13 3573.77 209.506   2
 -13 -10 -15 3605.65 159.413   1
 -13  -8 -15 12357.7 319.224   1
  -8 -15 -13 11405.6 376.061   2
 -13  -6 -15 3266.47 161.437   1
  -6 -15 -13 3517.21 197.722   2
 -15  13   6 3764.36 168.676   1
 -13  -4 -15 713.562 79.8212   1
  -4 -15 -13 796.328 99.2106   2
 -15  13   4 690.809 75.6936   1
 -15  13   2 24275.1 504.105   1
  -2 -15 -13 23725.8 547.770   2
 -13  -2 -15 24587.3 516.057   1
 -15  13   0 6781.91 242.319   1
   0 -15 -13 7061.63 269.051   2
 -13   0 -15 6558.70 246.260   1
 -15  13  -2 24248.3 521.720   1
   2 -15 -13 23966.7 545.024   2
 -13   2 -15 24487.9 534.442   1
  -4  15 -13 875.844 100.500   1
   4 -15 -13 801.652 96.1110   2
 -15  13  -4 648.375 83.8221   1
 -13   4 -15 595.288 84.2678   1
 -13   6 -15 3449.03 192.366   1
   6 -15 -13 3713.24 198.502   2
 -15  13  -6 3371.09 182.983   1
  -6  15 -13 3590.47 195.350   1
  -8  15 -13 12576.4 381.069   1
 -15  13  -8 11656.4 362.702   1
 -13   8 -15 11306.8 368.339   1
 -13  10 -15 3193.93 193.524   1
 -10  15 -13 3322.26 195.210   1
 -15  13 -10 3611.42 201.081   1
 -13  12 -15 3331.92 204.494   1
 -12  15 -13 3175.96 194.728   1
 -15  13 -12 2995.92 192.260   1
 -15  13 -14 969.215 121.673   1
 -13  14 -15 1133.57 131.183   1
 -14  15 -13 1242.35 137.087   1
 -13 -15 -14 234.046 74.8959   2
 -11 -15 -14 8979.68 348.273   2
 -14 -11 -15 9401.11 270.632   1
  -9 -15 -14 1769.00 149.187   2
 -14  -9 -15 1778.19 118.806   1
 -14  -7 -15 937.392 91.8181   1
  -7 -15 -14 797.127 103.416   2
 -15  14   7 1030.20 89.5074   1
  -5 -15 -14 12029.7 374.938   2
 -15  14   5 11400.1 311.513   1
 -14  -5 -15 11655.7 331.088   1
  -3 -15 -14 16763.3 450.976   2
 -14  -3 -15 16671.5 413.567   1
 -15  14   3 16283.5 391.334   1
 -15  14   1 2148.31 135.030   1
  -1 -15 -14 2153.05 150.992   2
 -14  -1 -15 2088.09 139.424   1
   1 -15 -14 2463.23 159.751   2
 -15  14  -1 2453.83 147.929   1
 -14   1 -15 2327.75 152.008   1
   3 -15 -14 16447.6 435.983   2
  -3  15 -14 16121.4 443.786   1
 -15  14  -3 15661.8 410.284   1
 -14   3 -15 16448.8 432.045   1
  -5  15 -14 11289.6 363.770   1
 -15  14  -5 11663.5 348.895   1
   5 -15 -14 11217.0 358.549   2
 -14   5 -15 11143.8 355.138   1
 -14   7 -15 891.656 105.749   1
   7 -15 -14 923.531 103.677   2
 -15  14  -7 803.328 98.8299   1
  -7  15 -14 778.946 102.449   1
 -14   9 -15 1711.24 143.939   1
 -15  14  -9 1708.66 140.240   1
  -9  15 -14 1711.33 143.217   1
 -11  15 -14 8914.40 335.801   1
 -14  11 -15 9435.39 347.209   1
 -15  14 -11 8660.06 327.361   1
 -15  14 -13 175.913 64.8977   1
 -13  15 -14 81.0185 59.6302   1
 -14  13 -15 242.466 74.2306   1
 -14 -15 -15 3983.03 243.463   2
 -12 -15 -15 13706.4 452.285   2
 -10 -15 -15 11937.5 406.882   2
 -15 -10 -15 12179.6 329.938   1
 -15  -8 -15 145.082 53.3168   1
  -8 -15 -15 208.275 64.1849   2
  -6 -15 -15 7464.20 297.263   2
 -15  -6 -15 7253.21 258.995   1
 -15  15   6 7262.61 240.049   1
  -4 -15 -15 13658.2 404.860   2
 -15  -4 -15 13273.0 367.123   1
 -15  15   4 12422.2 332.171   1
 -15  15   2 1355.32 108.666   1
  -2 -15 -15 1146.71 113.849   2
 -15  -2 -15 1347.21 117.111   1
 -15  15   0 4136.22 190.219   1
   0 -15 -15 4087.72 210.600   2
 -15   0 -15 4163.13 201.209   1
   2 -15 -15 1305.58 120.051   2
 -15  15  -2 1318.58 114.683   1
 -15   2 -15 1252.06 119.191   1
   4 -15 -15 14343.4 413.500   2
 -15  15  -4 13963.5 392.252   1
  -4  15 -15 14210.8 425.838   1
 -15   4 -15 15095.3 420.867   1
   6 -15 -15 7308.14 290.306   2
 -15  15  -6 6921.17 270.724   1
  -6  15 -15 7686.66 302.741   1
 -15   6 -15 7796.81 301.268   1
 -15   8 -15 197.413 69.4899   1
  -8  15 -15 151.940 69.8306   1
 -15  15  -8 138.440 56.9803   1
 -15  10 -15 13284.7 421.290   1
 -15  15 -10 12854.8 403.223   1
 -10  15 -15 12891.9 413.950   1
 -15  12 -15 11891.1 406.296   1
 -12  15 -15 11758.6 402.576   1
 -15  15 -12 11520.7 394.854   1
 -15  14 -15 4218.85 244.227   1
 -14  15 -15 4046.89 238.826   1
 -15  15 -14 4051.74 237.605   1
   0  16   0 112621. 1430.76   1
   0 -16   0 112573. 1506.74   2
   0   0 -16 113840. 1444.09   2
 -16   0   0 112173. 1564.77   1
  -2  16   0 22482.1 377.196   1
   2 -16   0 21937.5 436.722   2
  -2 -16   0 22141.5 433.909   2
   0   2 -16 22050.5 363.091   2
   0  -2 -16 22341.9 410.197   2
 -16   0   2 21951.0 474.870   1
 -16   0  -2 22475.4 477.162   1
 -16   0   4 32730.4 619.151   1
   0   4 -16 33161.1 454.134   2
   0  -4 -16 32701.9 562.247   2
  -4 -16   0 32463.4 567.589   2
  -4  16   0 32016.3 509.681   1
 -16   0  -4 32248.6 615.059   1
 -16   0  -6 7072.72 245.880   1
   0  -6 -16 6834.34 223.695   2
  -6 -16   0 6551.73 214.549   2
   0  -6 -16 6708.20 189.373   1
  -6  16   0 6654.63 186.380   1
 -16   0  -8 32578.8 633.288   1
   0  -8 -16 33017.2 615.783   2
  -8 -16   0 33009.6 597.918   2
  -8  16   0 34107.9 554.004   1
   8  16   0 32677.8 548.568   1
   0  -8 -16 33209.5 512.345   1
 -16   0 -10 5691.80 231.940   1
 -10 -16   0 5675.30 213.405   2
   0 -10 -16 5661.04 226.302   2
 -10  16   0 5983.77 197.300   1
   0 -10 -16 6040.49 137.894   1
   0 -12 -16 13.4408 39.8774   2
 -12  16   0 13.0014 38.2653   1
 -16   0 -12 1.50700 53.2555   1
 -14  16   0 1680.32 119.185   1
   0 -14 -16 1605.81 130.589   2
 -16   0 -14 1465.12 126.372   1
 -15  16   1 13560.7 357.087   1
  -1 -15 -16 12686.3 395.965   2
 -16  -1 -15 12886.0 382.139   1
 -13  16   1 3596.92 164.328   1
  -1 -13 -16 3907.90 200.249   2
 -16  -1 -13 3710.84 190.357   1
  -1 -11 -16 4328.27 201.668   2
 -11  16   1 4179.98 167.498   1
 -16  -1 -11 3954.25 192.360   1
  -1 -11 -16 4291.31 97.7110   1
 -16  -1  -9 26922.5 557.399   1
  -1  -9 -16 27149.9 548.956   2
  -9  16   1 26626.3 479.432   1
  -9 -16  -1 26405.2 533.615   2
  -1  -9 -16 27853.7 422.566   1
  -1  -7 -16 25676.6 510.516   2
  -7 -16  -1 25287.7 503.498   2
 -16  -1  -7 25309.0 529.891   1
  -7  16   1 25868.5 443.291   1
   7  16  -1 25330.2 459.086   1
  -1  -7 -16 26659.1 435.890   1
 -16  -1  -5 21788.1 476.124   1
  -1  -5 -16 22757.1 447.270   2
  -1  -5 -16 22711.6 412.454   1
  -5 -16  -1 21724.7 446.737   2
  -5  16   1 21989.6 378.652   1
  -3 -16  -1 20600.1 421.296   2
  -3  16   1 20990.7 347.543   1
  -1  -3 -16 20326.7 401.444   2
   3 -16   1 20476.1 416.312   2
 -16   1   3 20336.2 453.993   1
   1   3 -16 21173.9 324.399   2
 -16  -1  -3 20114.1 450.010   1
  -1  -1 -16 16522.2 331.586   2
   1   1 -16 16962.9 301.739   2
   1 -16   1 16249.7 351.135   2
 -16   1   1 16083.3 394.108   1
 -16  -1  -1 16702.5 395.301   1
  -1  16   1 16642.3 293.883   1
  -1 -16  -1 16662.9 364.195   2
  -1  16  -1 15799.2 311.211   1
   1  -1 -16 15706.9 315.319   2
  -1   1 -16 16578.2 305.959   2
   1 -16  -1 15936.8 356.863   2
  -1 -16   1 15874.6 342.953   2
 -16  -1   1 16268.3 388.647   1
 -16   1  -1 16059.3 387.978   1
  -3  16  -1 20909.8 373.310   1
 -16   1  -3 20355.2 454.351   1
  -3 -16   1 20420.5 404.335   2
  -1   3 -16 20233.0 335.910   2
 -16  -1   3 20397.7 456.959   1
   1  -3 -16 20341.1 394.167   2
   3 -16  -1 20572.3 426.920   2
 -16   1  -5 23332.0 495.828   1
   1  -5 -16 22986.5 453.123   2
  -1   5 -16 23805.0 340.392   2
  -5  16  -1 23705.9 417.102   1
  -5 -16   1 22884.8 445.054   2
   5  16   1 23283.2 396.348   1
   1  -7 -16 25765.7 514.740   2
 -16   1  -7 27534.5 555.308   1
  -7 -16   1 26841.9 502.404   2
  -7  16  -1 27360.8 475.647   1
   1  -9 -16 28412.0 427.524   1
   1  -9 -16 27416.1 546.968   2
 -16   1  -9 27891.1 571.244   1
  -9 -16   1 26583.5 518.569   2
  -9  16  -1 26695.1 491.139   1
   9  16   1 25102.7 465.819   1
   1 -11 -16 4372.00 200.030   2
 -16   1 -11 4062.74 198.653   1
   1 -11 -16 4208.13 97.5933   1
 -11  16  -1 4149.56 171.978   1
   1 -13 -16 4322.54 209.676   2
 -13  16  -1 4274.46 186.820   1
 -16   1 -13 4143.36 204.339   1
   1 -15 -16 13568.4 404.671   2
 -15  16  -1 12837.4 360.607   1
 -16   1 -15 13133.9 389.288   1
 -14  16   2 2121.54 128.108   1
 -16  -2 -14 2232.13 150.224   1
  -2 -14 -16 1970.17 149.201   2
 -12  16   2 8423.96 246.029   1
 -16  -2 -12 7957.48 278.599   1
  -2 -12 -16 8165.63 289.271   2
 -10  16   2 11666.2 279.468   1
 -16  -2 -10 11472.3 334.115   1
  -2 -10 -16 11663.3 338.940   2
  -2 -10 -16 12093.1 219.211   1
 -16  -2  -8 1683.87 123.464   1
  -8 -16  -2 1922.70 124.313   2
  -8  16   2 1945.66 97.8068   1
  -2  -8 -16 1758.29 120.838   2
  -2  -8 -16 1827.24 85.9452   1
 -16  -2  -6 1795.78 125.048   1
  -6 -16  -2 1719.92 113.113   2
  -2  -6 -16 1815.46 116.258   2
  -2  -6 -16 1690.82 90.9105   1
  -6  16   2 1854.68 85.4577   1
 -16  -2  -4 19693.2 441.994   1
  -4 -16  -2 19752.8 423.976   2
  -2  -4 -16 20147.6 411.290   2
  -2  -4 -16 20085.0 393.896   1
 -16   2   4 20275.9 452.789   1
  -4  16   2 20865.2 336.316   1
   2 -16   2 5522.35 185.514   2
   2   2 -16 6233.84 146.601   2
  -2  16   2 5975.44 138.618   1
  -2  -2 -16 6024.44 187.368   2
 -16  -2  -2 5811.91 218.211   1
  -2 -16  -2 5644.62 201.161   2
 -16   2   2 5401.97 211.864   1
  -2  -2 -16 5856.66 196.916   1
   0 -16   2 1146.95 81.0775   2
   2   0 -16 1225.27 70.7363   2
   0  16   2 1085.41 55.2261   1
  -2   0 -16 1129.45 74.6483   2
   0 -16  -2 1131.12 88.7704   2
 -16  -2   0 1101.85 99.2360   1
 -16   2   0 1126.86 100.156   1
 -16   2  -2 6421.17 232.327   1
   2 -16  -2 6202.94 210.517   2
   2  -2 -16 6145.93 180.389   2
  -2 -16   2 5969.12 186.141   2
  -2   2 -16 6157.56 164.724   2
 -16  -2   2 5721.73 220.474   1
  -2  16  -2 6255.50 183.280   1
 -16   2  -4 21317.5 472.403   1
   2  -4 -16 21606.4 422.198   2
  -2   4 -16 22626.2 352.166   2
  -4 -16   2 21616.4 413.590   2
   4  16   2 22187.5 356.705   1
   4 -16  -2 21028.9 449.662   2
  -4  16  -2 21648.8 403.273   1
 -16   2  -6 2322.11 142.199   1
   2  -6 -16 2091.85 118.303   2
  -6  16  -2 1855.97 103.053   1
  -2   6 -16 2118.73 67.6197   2
  -6 -16   2 1951.63 109.010   2
   6  16   2 2063.01 89.3568   1
  -8  16  -2 1708.63 103.524   1
 -16   2  -8 1592.56 123.077   1
   2  -8 -16 1731.26 116.702   2
  -8 -16   2 1733.11 104.674   2
 -16   2 -10 11351.0 341.681   1
 -10 -16   2 11530.1 305.475   2
   2 -10 -16 11587.9 330.997   2
   2 -10 -16 12276.3 224.841   1
   2 -10 -16 11745.6 219.161   1
 -10  16  -2 11432.0 299.820   1
   2 -12 -16 8704.21 295.699   2
 -16   2 -12 8902.43 303.366   1
 -12  16  -2 8690.32 268.563   1
   2 -14 -16 1863.41 144.300   2
 -14  16  -2 2072.09 134.872   1
 -16   2 -14 2185.99 153.074   1
  -3 -15 -16 1816.95 146.425   2
 -16  -3 -15 1970.21 142.334   1
 -15  16   3 2081.24 130.520   1
 -16  -3 -13 7990.86 280.911   1
  -3 -13 -16 7954.34 293.141   2
 -13  16   3 7835.37 240.705   1
 -11  16   3 4851.87 170.099   1
 -16  -3 -11 4551.15 203.402   1
  -3 -11 -16 4176.04 202.743   2
  -3 -11 -16 4652.81 111.048   1
  -3  -9 -16 3293.31 109.200   1
  -9  16   3 3364.88 129.440   1
 -16  -3  -9 3230.97 167.497   1
  -3  -9 -16 3279.57 168.299   2
  -9 -16  -3 3153.87 166.364   2
 -16  -3  -7 1402.74 114.128   1
  -7 -16  -3 1291.14 102.666   2
  -7  16   3 1360.50 74.5853   1
  -3  -7 -16 1287.89 103.614   2
  -3  -7 -16 1500.56 80.5929   1
 -16  -3  -5 28456.9 558.220   1
  -3  -5 -16 27888.1 486.674   1
  -5  16   3 29072.7 430.558   1
  -5 -16  -3 27292.2 540.179   2
  -3  -5 -16 28077.7 532.484   2
 -16   3   5 28408.7 563.694   1
  -3  -3 -16 1466.30 94.7534   1
  -3 -16  -3 1605.85 108.534   2
  -3  -3 -16 1454.98 95.3046   2
  -3  16   3 1557.22 62.1895   1
 -16   3   3 1518.73 113.013   1
 -16  -3  -3 1664.44 118.195   1
   1 -16   3 15323.8 325.578   2
  -1  16   3 15875.5 243.856   1
  -1 -16  -3 14879.1 356.775   2
  -3  -1 -16 15493.5 327.252   2
 -16  -3  -1 14926.5 374.258   1
   3   1 -16 15479.3 282.819   2
  -3  -1 -16 15389.4 354.441   1
 -16   3   1 15091.8 376.286   1
 -16   3  -1 16005.3 390.259   1
   3  -1 -16 16372.8 317.771   2
  -3   1 -16 16015.8 375.726   1
   1  16   3 16287.8 253.872   1
  -3   1 -16 15719.6 319.161   2
   1 -16  -3 16118.4 370.331   2
  -1  16  -3 15898.0 337.136   1
  -1 -16   3 16246.6 331.385   2
 -16  -3   1 15858.3 390.721   1
 -16   3  -3 2180.81 136.900   1
  -3 -16   3 2108.39 103.454   2
   3 -16  -3 2023.61 123.962   2
   3  -3 -16 1932.68 103.111   2
  -3   3 -16 2050.69 127.340   1
  -3   3 -16 2134.32 92.1417   2
  -3  16  -3 2215.66 110.785   1
   3  16   3 2142.03 72.9635   1
  -3   5 -16 29246.8 434.231   2
 -16   3  -5 27770.1 566.397   1
   3  -5 -16 28133.0 514.834   2
  -5 -16   3 27879.3 491.634   2
   5 -16  -3 28385.1 550.500   2
  -5  16  -3 28383.4 502.986   1
   5  16   3 28558.1 427.113   1
 -16   3  -7 1728.31 126.160   1
   3  -7 -16 2037.96 121.589   2
  -7  16  -3 1789.91 105.460   1
   7  16   3 2003.22 86.7761   1
  -7 -16   3 1768.74 100.955   2
  -3   7 -16 1939.19 67.5992   2
  -3   9 -16 2703.02 59.4917   2
   3  -9 -16 2664.39 148.171   2
 -16   3  -9 2704.89 158.544   1
  -3   9 -16 2602.22 59.9949   2
  -9 -16   3 2881.23 135.388   2
   3  -9 -16 2812.93 102.737   1
  -9  16  -3 2956.78 141.164   1
  -3  11 -16 4259.77 214.665   1
   3 -11 -16 4591.51 113.470   1
 -16   3 -11 4337.39 207.166   1
   3 -11 -16 4370.49 199.600   2
 -11  16  -3 4405.61 185.254   1
   3 -13 -16 7211.87 272.737   2
 -13  16  -3 7141.38 251.852   1
 -16   3 -13 7258.43 277.638   1
  -3  13 -16 6930.26 285.360   1
   3 -15 -16 2080.92 154.249   2
 -15  16  -3 1632.57 129.126   1
 -16   3 -15 2027.93 153.271   1
  -3  15 -16 2003.48 157.825   1
  -4 -14 -16 11031.4 361.352   2
 -16  -4 -14 11124.2 337.497   1
 -14  16   4 11528.4 304.330   1
 -16  -4 -12 11569.3 338.051   1
  -4 -12 -16 11850.6 358.696   2
 -12  16   4 11944.4 292.117   1
 -16  -4 -10 2751.26 154.896   1
  -4 -10 -16 2860.97 163.585   2
  -4 -10 -16 3056.90 99.5702   1
 -10 -16  -4 2803.07 161.990   2
 -10  16   4 2890.83 122.035   1
  -8  16   4 19225.1 340.971   1
 -16  -4  -8 18854.7 436.207   1
  -4  -8 -16 18488.2 435.878   2
  -8 -16  -4 18601.7 439.314   2
  -4  -8 -16 18949.3 343.494   1
 -16  -4  -6 3579.94 170.438   1
  -6  16   4 3554.05 107.256   1
  -6 -16  -4 3156.91 160.218   2
  -4  -6 -16 3355.50 160.269   2
  -4  -6 -16 3396.32 131.390   1
  -4  16   4 6560.72 136.105   1
  -4  -4 -16 6461.41 197.535   1
  -4 -16  -4 6409.18 225.414   2
  -4  -4 -16 6477.43 215.272   2
 -16   4   4 6289.64 229.291   1
 -16  -4  -4 6504.82 232.577   1
  -2 -16  -4 7379.55 244.551   2
  -4  -2 -16 7976.26 229.547   2
  -4  -2 -16 7672.23 231.868   1
  -2  16   4 7985.70 136.530   1
 -16  -4  -2 7933.79 258.113   1
 -16   4   2 7882.92 259.024   1
   0 -16   4 17968.7 349.914   2
   4   0 -16 17708.4 327.294   2
  -4   0 -16 17559.3 393.078   1
   0 -16  -4 17885.1 404.598   2
 -16  -4   0 17938.4 418.168   1
   0  16   4 18168.7 243.156   1
 -16   4   0 17917.5 418.506   1
 -16   4  -2 8564.91 272.517   1
   2 -16  -4 8509.24 259.627   2
  -2 -16   4 8577.36 215.070   2
   2  16   4 8383.03 142.203   1
   4  -2 -16 8431.49 217.807   2
  -2  16  -4 8890.37 229.296   2
  -4   2 -16 8379.46 263.460   1
  -2  16  -4 8572.72 239.656   1
   2  16   4 8444.51 141.200   1
   4 -16  -4 6450.26 229.212   2
   4  -4 -16 6400.21 200.076   2
   4  16   4 6629.96 134.596   1
  -4 -16   4 6533.94 185.699   2
 -16   4  -4 6244.98 233.332   1
  -4   4 -16 6421.85 238.103   1
  -4  16  -4 6178.25 201.731   1
   6  16   4 3531.38 106.468   1
 -16   4  -6 3487.87 175.499   1
  -6 -16   4 3412.78 134.983   2
  -4   6 -16 3653.04 180.773   1
  -6  16  -4 3453.81 147.978   1
   4  -6 -16 3650.32 156.758   2
   4  -8 -16 17624.2 403.268   2
  -8  16  -4 17673.4 386.371   1
   8  16   4 17263.6 316.190   1
 -16   4  -8 17197.7 430.343   1
  -8 -16   4 17865.3 362.000   2
  -4   8 -16 16713.9 435.212   1
  -4  10 -16 2965.61 74.7637   2
   4 -10 -16 2693.32 154.947   2
 -16   4 -10 2936.19 170.325   1
 -10 -16   4 3015.50 137.140   2
  -4  10 -16 2703.70 169.036   1
   4 -10 -16 2980.64 100.965   1
 -10  16  -4 2816.39 145.741   1
   4 -12 -16 12260.0 360.946   2
  -4  12 -16 12135.5 380.302   1
 -16   4 -12 12351.3 369.121   1
 -12  16  -4 11974.8 332.275   1
   4 -14 -16 10959.6 351.699   2
 -14  16  -4 10900.1 332.377   1
 -16   4 -14 11052.0 357.093   1
  -4  14 -16 10990.8 371.397   1
 -16  -5 -15 5485.21 231.549   1
  -5 -15 -16 5871.37 264.880   2
 -15  16   5 5410.36 205.967   1
 -16  -5 -13 1382.84 114.830   1
  -5 -13 -16 1430.30 128.886   2
 -13  16   5 1338.53 94.2473   1
  -5 -11 -16 28336.7 417.272   1
  -5 -11 -16 27386.0 589.953   2
 -11  16   5 27174.6 479.624   1
 -16  -5 -11 27253.4 561.373   1
 -16  -5  -9 4279.66 193.398   1
  -5  -9 -16 4213.54 196.238   2
  -9 -16  -5 4449.93 204.010   2
  -5  -9 -16 4528.96 137.594   1
  -9  16   5 4605.33 143.611   1
  -5  -7 -16 3120.45 122.776   1
  -7 -16  -5 3049.86 161.659   2
  -5  -7 -16 3079.78 160.303   2
  -7  16   5 3283.40 104.545   1
 -16  -5  -7 2954.65 157.337   1
 -16   5   5 3733.16 175.238   1
  -5 -16  -5 3350.46 169.662   2
  -5  -5 -16 3408.53 162.127   2
  -5  -5 -16 3437.33 138.715   1
 -16  -5  -5 3711.79 172.907   1
  -5  16   5 3808.85 94.8952   1
  -3 -16  -5 19083.9 424.511   2
  -5  -3 -16 18520.1 398.606   2
 -16  -5  -3 19305.5 429.614   1
  -3  16   5 18152.6 241.202   1
 -16   5   3 19160.7 430.763   1
  -5  -3 -16 18757.4 385.818   1
  -1 -16  -5 11171.3 308.278   2
  -5  -1 -16 10761.5 286.766   1
 -16  -5  -1 10659.7 307.655   1
 -16   5   1 11129.3 311.608   1
   1 -16  -5 11981.1 319.491   2
  -1 -16   5 11542.4 255.406   2
 -16   5  -1 12293.8 333.286   1
  -5   1 -16 11166.9 306.884   1
  -3  16  -5 19384.6 406.540   1
 -16   5  -3 19067.4 445.635   1
  -5   3 -16 19120.1 437.792   1
  -3 -16   5 20208.2 361.026   2
   5  -3 -16 19048.7 383.664   2
  -3  16  -5 20002.7 379.349   2
   3 -16  -5 19482.4 434.455   2
   5 -16  -5 3785.62 178.417   2
  -5  16  -5 3786.83 161.690   1
  -5 -16   5 3833.97 135.595   2
  -5   5 -16 4115.82 189.662   1
 -16   5  -5 3829.59 185.632   1
   5  16   5 3942.79 94.3527   1
   5  -5 -16 3943.28 160.980   2
   5  -7 -16 3004.92 148.625   2
  -7 -16   5 2961.44 121.972   2
 -16   5  -7 2893.32 165.072   1
   7  16   5 2844.77 93.9434   1
  -5   7 -16 2639.64 158.289   1
  -7  16  -5 2799.13 140.410   1
   5  -9 -16 4159.34 187.145   2
  -9  16  -5 4045.04 176.538   1
  -9 -16   5 4584.34 160.926   2
   9  16   5 4453.00 136.089   1
 -16   5  -9 3943.39 196.589   1
  -5   9 -16 4210.08 206.942   1
   5  -9 -16 4423.48 137.501   1
  -5  11 -16 28145.4 619.647   1
 -11 -16   5 28046.4 511.628   2
 -16   5 -11 28555.8 606.529   1
   5 -11 -16 27531.9 581.889   2
 -11  16  -5 27422.5 556.727   1
   5 -13 -16 1269.88 121.414   2
  -5  13 -16 1454.05 132.265   1
 -13  16  -5 1218.87 107.843   1
 -16   5 -13 1368.57 123.599   1
   5 -15 -16 5380.09 251.066   2
  -5  15 -16 5864.49 268.871   1
 -15  16  -5 5219.50 233.202   1
 -16   5 -15 5616.51 255.632   1
 -16  -6 -14 3863.66 188.155   1
  -6 -14 -16 3920.26 212.285   2
 -14  16   6 4122.00 168.044   1
 -16  -6 -12 16210.9 405.045   1
  -6 -12 -16 16199.1 439.102   2
 -12  16   6 16456.3 344.587   1
 -16  -6 -10 8988.49 286.549   1
  -6 -10 -16 9912.59 216.500   1
  -6 -10 -16 9324.23 310.339   2
 -10 -16  -6 9733.50 319.373   2
 -10  16   6 9998.31 229.461   1
  -8 -16  -6 5975.94 236.032   2
  -6  -8 -16 5650.18 227.131   2
  -8  16   6 5967.11 149.825   1
  -6  -8 -16 5659.46 168.485   1
 -16  -6  -8 5703.42 218.505   1
  -6  -6 -16 22767.3 419.806   1
  -6  -6 -16 21761.3 482.255   2
 -16   6   6 22363.4 485.235   1
  -6  16   6 23074.3 333.904   1
  -6 -16  -6 22945.7 499.250   2
 -16  -6  -6 22025.2 478.322   1
  -4 -16  -6 2956.30 159.001   2
  -6  -4 -16 3241.40 138.877   1
 -16   6   4 3265.28 162.843   1
 -16  -6  -4 2944.04 154.548   1
  -6   2  16 11888.9 283.228   2
 -16  -6  -2 12220.9 332.540   1
  -2 -16  -6 12586.1 336.618   2
  -6  -2 -16 12513.7 308.489   1
 -16   6   2 12834.1 336.638   1
  -6   0 -16 16066.0 371.669   1
   0 -16  -6 15397.5 379.798   2
 -16   6   0 15651.1 386.819   1
  -2 -16   6 12662.5 257.634   2
   2 -16  -6 12684.2 338.100   2
  -2  16  -6 12492.7 316.875   1
 -16   6  -2 12187.2 338.122   1
  -6   2 -16 12480.3 333.685   1
  -2  16  -6 12443.9 272.333   2
   6  -4 -16 3562.61 149.065   2
  -4  16  -6 3760.06 140.856   2
 -16   6  -4 3734.10 180.726   1
   4 -16  -6 3875.39 179.843   2
  -6   4 -16 3398.50 170.276   1
  -4 -16   6 3532.56 121.678   2
  -4  16  -6 3508.39 159.485   1
  -6  16  -6 22429.7 468.999   1
   6 -16  -6 23412.2 509.605   2
   6  -6 -16 22849.6 465.548   2
  -6 -16   6 23289.5 401.722   2
 -16   6  -6 23189.8 511.836   1
  -6   6 -16 22382.8 506.459   1
   6  16   6 23368.4 329.604   1
   6  -8 -16 5197.40 205.572   2
  -8 -16   6 5303.03 164.016   2
  -8  16  -6 5145.52 201.549   1
 -16   6  -8 5378.79 229.536   1
   6  -8 -16 5256.58 162.298   1
   8  16   6 5168.34 133.418   1
  -6   8 -16 5105.10 225.014   1
   6 -10 -16 9133.27 295.217   2
 -10 -16   6 9554.78 242.548   2
 -16   6 -10 9432.31 313.663   1
 -10  16  -6 8924.60 283.203   1
  -6  10 -16 9161.40 319.429   1
   6 -12 -16 16552.9 435.505   2
 -16   6 -12 16988.0 451.227   1
  -6  12 -16 17631.9 470.498   1
 -12  16  -6 16669.1 419.322   1
 -14  16  -6 4019.57 198.668   1
 -16   6 -14 3571.23 202.245   1
  -6  14 -16 3478.45 205.561   1
   6 -14 -16 3838.58 205.485   2
  -7 -15 -16 5575.41 267.675   2
 -16  -7 -15 5788.55 232.577   1
 -15  16   7 5857.50 210.409   1
 -16  -7 -13 5056.52 213.886   1
  -7 -13 -16 5697.23 256.156   2
 -13  16   7 5557.15 186.257   1
  -7 -11 -16 12837.9 250.859   1
 -16  -7 -11 11716.0 334.797   1
  -7 -11 -16 11999.2 368.337   2
 -11  16   7 12246.2 272.364   1
  -7  -9 -16 1380.66 80.2336   1
  -9 -16  -7 1318.27 116.343   2
  -7  -9 -16 1250.66 113.149   2
 -16  -7  -9 1131.91 99.4465   1
  -7 -16  -7 2840.55 163.805   2
  -7  -7 -16 2671.21 155.306   2
  -7  -7 -16 2843.92 122.246   1
 -16  -7  -7 2680.18 146.520   1
  -7  -5 -16 8389.28 233.767   1
  -5 -16  -7 7897.16 272.072   2
 -16   7   5 8262.05 265.133   1
 -16  -7  -5 8585.43 267.692   1
  -7  -3 -16 17794.1 383.935   1
  -3 -16  -7 17520.0 424.624   2
 -16  -7  -3 17913.5 415.639   1
 -16   7   3 19053.4 427.669   1
 -16   7   1 4921.68 202.898   1
  -1 -16  -7 4772.52 201.259   2
  -7   1  16 5068.30 164.746   2
  -7  -1 -16 4813.84 186.471   1
  -7   1 -16 4666.43 193.104   1
 -16   7  -1 4891.62 202.821   1
   1 -16  -7 4854.52 203.391   2
  -7  -1  16 4927.02 149.340   2
  -7   3 -16 18315.3 430.482   1
  -3 -16   7 19315.9 326.102   2
 -16   7  -3 18191.5 433.824   1
  -3  16  -7 18379.8 348.873   2
  -3  16  -7 18437.3 414.502   1
   3 -16  -7 17949.3 429.140   2
   5 -16  -7 8658.90 283.611   2
  -5 -16   7 8558.98 195.141   2
  -7   5 -16 8676.41 288.019   1
  -5  16  -7 8516.13 223.934   2
 -16   7  -5 8291.77 282.676   1
  -5  16  -7 8662.77 268.374   1
  -7   7 -16 2394.42 154.994   1
   7  16   7 2465.45 72.9448   1
  -7 -16   7 2431.22 100.728   2
 -16   7  -7 2582.22 158.449   1
   7  -7 -16 2374.69 114.148   1
  -7  16  -7 2633.97 144.590   1
   7  -9 -16 1335.10 108.501   2
 -16   7  -9 1161.66 111.340   1
  -9  16  -7 1089.91 99.0724   1
  -9 -16   7 1297.24 78.9051   2
  -7   9 -16 1171.32 114.637   1
   7  -9 -16 1391.33 81.0183   1
 -11  16  -7 11636.2 343.629   1
   7 -11 -16 12053.5 357.194   2
  -7  11 -16 12550.2 386.615   1
 -11 -16   7 12715.8 286.739   2
 -16   7 -11 12465.0 376.156   1
   7 -13 -16 5072.32 232.839   2
  -7  13 -16 5051.63 244.638   1
 -16   7 -13 4849.56 234.770   1
 -13  16  -7 4693.12 217.295   1
   7 -15 -16 5961.21 266.538   2
  -7  15 -16 5842.00 271.515   1
 -15  16  -7 5653.75 249.440   1
 -16   7 -15 6299.98 275.447   1
 -16  -8 -14 596.378 81.9156   1
  -8 -14 -16 416.224 86.2077   2
 -16  -8 -12 1407.36 110.545   1
  -8 -12 -16 1197.64 119.265   2
  -8 -10 -16 11258.3 256.419   1
  -8 -10 -16 11083.2 353.661   2
 -10 -16  -8 11568.4 362.182   2
 -16  -8 -10 11834.4 326.372   1
  -8  -8 -16 24582.2 440.237   1
  -8 -16  -8 23300.2 540.314   2
 -16  -8  -8 24242.7 502.579   1
  -6 -16  -8 6849.51 258.364   2
 -16   8   6 7056.90 243.318   1
 -16  -8  -6 6748.45 238.570   1
  -8  -6 -16 7050.90 210.952   1
  -8  -4 -16 710.176 71.1592   1
  -4 -16  -8 913.527 94.3396   2
 -16  -8  -4 782.227 82.8655   1
 -16   8   4 859.546 88.6804   1
  -2 -16  -8 1995.85 135.012   2
  -8  -2 -16 1906.82 117.211   1
 -16   8   2 2023.37 130.616   1
   0 -16  -8 71225.3 1098.60   2
 -16   8   0 71229.5 1087.68   1
  -8   0 -16 69379.7 1062.77   1
 -16   8  -2 2681.58 152.860   1
   2 -16  -8 2247.45 141.401   2
  -2  16  -8 2541.66 142.720   1
  -8  -2  16 2289.47 97.4606   2
  -2  16  -8 2597.09 103.343   2
  -8   2 -16 2468.75 142.751   1
   4 -16  -8 525.114 79.0823   2
  -8   4 -16 644.145 80.3183   1
 -16   8  -4 633.165 84.1316   1
  -4  16  -8 711.274 59.9619   2
  -4 -16   8 665.077 46.9832   2
  -4  16  -8 676.676 77.5546   1
 -16   8  -6 6415.86 251.907   1
  -8   6 -16 6881.82 259.063   1
  -6 -16   8 7341.46 166.983   2
  -6  16  -8 6857.51 243.934   1
  -6  16  -8 7070.65 203.393   2
   6 -16  -8 6783.28 257.540   2
  -8   8 -16 24145.4 554.047   1
  -8 -16   8 25244.7 407.839   2
 -16   8  -8 25253.5 555.804   1
  -8  16  -8 24638.0 524.124   1
  -8  10 -16 11079.3 360.700   1
 -10 -16   8 11633.3 252.947   2
 -10  16  -8 10853.2 330.748   1
 -16   8 -10 11563.8 357.620   1
 -12  16  -8 1468.99 123.411   1
 -12 -16   8 1330.18 84.8157   2
  -8  12 -16 1274.49 126.965   1
 -16   8 -12 1363.82 126.199   1
  -8  14 -16 523.663 89.4285   1
 -14  16  -8 630.533 94.3681   1
 -16   8 -14 502.170 91.1889   1
 -16  -9 -15 5527.78 223.090   1
  -9 -15 -16 5213.88 261.931   2
  -9 -13 -16 2617.92 179.654   2
 -16  -9 -13 2661.33 150.547   1
  -9 -11 -16 7004.79 188.539   1
  -9 -11 -16 6567.34 274.277   2
 -11 -16  -9 6621.21 278.157   2
 -16  -9 -11 6501.40 235.586   1
  -9 -16  -9 3948.52 205.249   2
 -16  -9  -9 3890.33 179.344   1
  -9  -9 -16 3686.06 145.506   1
  -7 -16  -9 21756.7 510.943   2
  -9  -7 -16 21818.0 422.876   1
 -16   9   7 21261.8 465.240   1
 -16  -9  -7 20853.2 459.923   1
  -5 -16  -9 1300.92 116.863   2
 -16  -9  -5 1044.11 95.2189   1
 -16   9   5 1144.76 99.8990   1
  -9  -5 -16 1228.65 90.4256   1
  -9  -3 -16 2594.56 135.482   1
  -3 -16  -9 2708.63 157.561   2
 -16   9   3 2468.11 142.455   1
  -1 -16  -9 4788.54 213.438   2
 -16   9   1 4817.05 202.832   1
  -9  -1 -16 5317.44 201.601   1
  -9   1  16 4779.59 166.559   2
 -16   9  -1 4523.65 198.557   1
   1 -16  -9 4653.41 205.231   2
  -9   1 -16 4725.57 199.525   1
   3 -16  -9 3167.94 169.858   2
  -3  16  -9 3056.28 162.213   1
 -16   9  -3 2686.66 158.168   1
  -9  -3  16 2979.41 108.782   2
  -3  16  -9 3127.21 111.951   2
  -9   3 -16 3016.09 163.800   1
   5 -16  -9 1152.27 110.523   2
  -5  16  -9 1278.41 77.2345   2
 -16   9  -5 1212.35 110.727   1
  -5  16  -9 1253.47 108.258   1
  -9   5 -16 1219.09 111.066   1
  -5 -16   9 1282.56 57.1014   2
  -7  16  -9 19889.8 466.417   1
 -16   9  -7 19555.7 480.712   1
  -7 -16   9 20683.2 325.987   2
   7 -16  -9 20069.7 486.340   2
  -9   7 -16 20791.6 496.281   1
  -9 -16   9 4150.52 123.794   2
  -9  16  -9 3844.80 192.596   1
 -16   9  -9 3921.60 202.326   1
  -9   9 -16 4028.50 208.236   1
 -11 -16   9 6927.53 181.422   2
 -11  16  -9 6567.61 260.152   1
 -16   9 -11 6716.51 276.252   1
  -9  11 -16 6703.51 279.043   1
 -16   9 -13 2492.45 172.309   1
  -9  13 -16 2582.62 177.631   1
 -13  16  -9 2269.26 156.558   1
 -15  16  -9 5282.70 251.677   1
 -16   9 -15 5919.59 276.156   1
  -9  15 -16 5863.74 274.804   1
 -10 -14 -16 1151.18 127.285   2
 -16 -10 -14 1106.26 99.7256   1
 -10 -12 -16 7039.16 296.098   2
 -12 -16 -10 7454.77 305.320   2
 -16 -10 -12 7183.04 247.555   1
 -10 -10 -16 7815.01 217.838   1
 -10 -16 -10 7737.52 301.114   2
 -16 -10 -10 7999.26 261.252   1
 -10  -8 -16 3670.92 154.163   1
  -8 -16 -10 4099.89 209.055   2
 -16 -10  -8 3989.68 178.774   1
  -6 -16 -10 1473.06 125.565   2
 -10  -6 -16 1435.97 98.4717   1
 -16 -10  -6 1273.45 102.896   1
 -16  10   6 1219.12 100.445   1
  -4 -16 -10 3299.09 181.328   2
 -16  10   4 3511.23 169.288   1
 -10  -4 -16 3092.46 150.005   1
  -2 -16 -10 5017.97 220.815   2
 -10  -2 -16 5278.84 201.869   1
 -16  10   2 5209.22 208.711   1
 -10   0 -16 2546.44 145.267   1
   0 -16 -10 2347.54 150.607   2
 -16  10   0 2656.99 151.177   1
   2 -16 -10 5654.17 231.511   2
 -16  10  -2 5153.96 216.775   1
 -10   2 -16 5685.91 225.349   1
   4 -16 -10 3307.54 178.396   2
 -16  10  -4 3167.44 173.350   1
  -4  16 -10 2967.66 165.617   1
  -4  16 -10 3105.42 112.695   2
 -10   4 -16 3109.82 171.143   1
   6 -16 -10 970.730 102.575   2
  -6  16 -10 1297.90 112.047   1
 -16  10  -6 1099.09 107.593   1
 -10   6 -16 1102.24 109.755   1
 -16  10  -8 3817.16 201.628   1
 -10   8 -16 4262.28 213.528   1
  -8  16 -10 4020.94 197.907   1
 -10  16 -10 7075.08 273.920   1
 -16  10 -10 7746.51 295.256   1
 -10  10 -16 7603.49 296.081   1
 -12  16 -10 6971.58 277.598   1
 -10  12 -16 7075.08 292.486   1
 -16  10 -12 6866.90 285.611   1
 -16  10 -14 1052.73 125.622   1
 -14  16 -10 1103.78 120.183   1
 -10  14 -16 1045.41 123.547   1
 -11 -15 -16 159.965 68.0448   2
 -16 -11 -15 119.225 49.4287   1
 -11 -13 -16 9944.04 365.866   2
 -16 -11 -13 9793.70 293.356   1
 -11 -16 -11 7421.31 303.663   2
 -16 -11 -11 7073.53 244.341   1
 -11 -11 -16 7461.45 213.614   1
 -11  -9 -16 6499.53 210.023   1
  -9 -16 -11 6783.54 280.901   2
 -16 -11  -9 6699.75 235.091   1
 -11  -7 -16 2114.27 122.397   1
  -7 -16 -11 2206.84 159.569   2
 -16 -11  -7 1995.50 126.758   1
 -16  11   7 2224.47 134.116   1
  -5 -16 -11 21942.1 518.917   2
 -11  -5 -16 21839.8 453.472   1
 -16  11   5 21216.6 466.752   1
  -3 -16 -11 39406.2 745.832   2
 -11  -3 -16 38620.4 687.704   1
 -16  11   3 39148.2 703.377   1
 -11  -1 -16 24092.7 508.869   1
 -16  11   1 24428.8 517.992   1
  -1 -16 -11 25249.2 554.403   2
 -11   1 -16 24881.4 532.483   1
 -16  11  -1 25374.4 536.756   1
   1 -16 -11 25307.0 554.601   2
   3 -16 -11 38979.2 739.215   2
 -16  11  -3 38798.6 725.826   1
  -3  16 -11 38667.4 731.673   1
 -11   3 -16 39030.2 725.453   1
 -11   5 -16 21532.5 506.184   1
 -16  11  -5 21355.1 500.767   1
   5 -16 -11 21466.4 511.972   2
  -5  16 -11 21291.4 500.564   1
  -7  16 -11 1499.00 126.154   1
   7 -16 -11 1466.74 129.147   2
 -11   7 -16 1512.48 129.359   1
 -16  11  -7 1631.30 130.258   1
 -11   9 -16 6443.66 271.444   1
 -16  11  -9 6003.23 258.728   1
  -9  16 -11 6318.56 258.947   1
 -11  16 -11 6096.45 260.999   1
 -11  11 -16 6242.46 272.520   1
 -16  11 -11 6214.12 270.420   1
 -13  16 -11 9291.48 336.500   1
 -11  13 -16 9664.86 353.011   1
 -16  11 -13 9288.38 346.370   1
 -15  16 -11 17.7397 54.3394   1
 -16  11 -15 36.2251 60.7351   1
 -11  15 -16 108.565 61.9807   1
 -12 -14 -16 1500.76 148.153   2
 -16 -12 -14 1535.95 111.289   1
 -12 -16 -12 10630.3 384.052   2
 -16 -12 -12 11087.9 308.552   1
 -12 -10 -16 14040.0 329.954   1
 -10 -16 -12 13193.8 417.558   2
 -16 -12 -10 13858.9 354.163   1
 -12  -8 -16 13074.6 332.671   1
  -8 -16 -12 13575.6 412.127   2
  -6 -16 -12 10053.1 339.913   2
 -12  -6 -16 9854.94 285.771   1
 -16  12   6 9633.95 290.470   1
  -4 -16 -12 5292.97 237.753   2
 -12  -4 -16 5769.90 216.809   1
 -16  12   4 5747.77 218.376   1
  -2 -16 -12 358.196 77.0643   2
 -16  12   2 511.152 76.0361   1
 -12  -2 -16 345.889 64.9018   1
   0 -16 -12 7795.04 286.048   2
 -16  12   0 7730.55 266.652   1
 -12   0 -16 7616.84 266.687   1
 -16  12  -2 487.972 75.9585   1
   2 -16 -12 545.193 87.3981   2
 -12   2 -16 401.771 74.2759   1
   4 -16 -12 6391.29 259.642   2
 -16  12  -4 6539.81 255.405   1
  -4  16 -12 6210.53 254.603   1
 -12   4 -16 6172.69 250.829   1
   6 -16 -12 9622.30 328.515   2
 -12   6 -16 9515.71 326.677   1
 -16  12  -6 9153.95 313.779   1
  -6  16 -12 9584.60 323.267   1
 -12   8 -16 14137.6 414.492   1
 -16  12  -8 14298.9 409.663   1
  -8  16 -12 14259.6 409.851   1
 -12  10 -16 15521.2 444.455   1
 -10  16 -12 14425.6 421.753   1
 -16  12 -10 14772.1 431.412   1
 -12  16 -12 10800.9 366.257   1
 -12  12 -16 11352.8 386.818   1
 -16  12 -12 11496.5 384.102   1
 -14  16 -12 1544.83 145.902   1
 -12  14 -16 1569.93 149.571   1
 -16  12 -14 1581.87 147.791   1
 -13 -15 -16 15549.7 501.162   2
 -13 -16 -13 9282.97 363.308   2
 -11 -16 -13 11387.9 395.352   2
 -13 -11 -16 11734.4 298.308   1
  -9 -16 -13 10259.1 365.174   2
 -13  -9 -16 10387.0 291.105   1
 -13  -7 -16 1493.72 110.322   1
  -7 -16 -13 1474.08 133.644   2
 -16  13   7 1599.29 113.983   1
 -13  -5 -16 6501.71 236.073   1
  -5 -16 -13 6489.30 272.316   2
 -16  13   5 6673.89 236.369   1
  -3 -16 -13 1150.01 116.494   2
 -13  -3 -16 1213.59 105.833   1
 -16  13   3 1087.45 97.1152   1
  -1 -16 -13 1063.23 111.912   2
 -13  -1 -16 1130.53 104.326   1
 -16  13   1 1202.45 106.072   1
   1 -16 -13 1183.08 115.454   2
 -13   1 -16 1287.33 113.280   1
 -16  13  -1 1279.55 111.281   1
 -13   3 -16 1705.93 133.963   1
 -16  13  -3 1782.33 134.454   1
   3 -16 -13 1876.85 141.635   2
  -3  16 -13 1553.54 134.850   1
  -5  16 -13 5989.91 259.329   1
   5 -16 -13 6328.60 264.222   2
 -16  13  -5 5950.84 249.442   1
 -13   5 -16 6493.82 264.451   1
   7 -16 -13 1907.21 148.891   2
  -7  16 -13 1930.73 149.358   1
 -16  13  -7 1543.56 133.810   1
 -13   7 -16 1816.50 147.474   1
 -13   9 -16 11278.5 373.301   1
 -16  13  -9 10764.9 359.898   1
  -9  16 -13 10267.9 353.246   1
 -13  11 -16 11849.1 394.731   1
 -11  16 -13 11788.2 386.407   1
 -16  13 -11 11383.0 385.506   1
 -13  16 -13 9254.08 349.710   1
 -13  13 -16 9403.15 357.492   1
 -16  13 -13 9171.87 354.967   1
 -13  15 -16 17127.1 510.333   1
 -16  13 -15 17457.3 520.104   1
 -15  16 -13 16928.5 500.551   1
 -14 -16 -14 21434.0 601.735   2
 -14 -14 -16 21000.1 593.343   2
 -12 -16 -14 3827.91 231.443   2
 -14 -10 -16 6464.27 226.221   1
 -10 -16 -14 6832.55 301.095   2
 -14  -8 -16 2016.55 129.111   1
  -8 -16 -14 1892.05 157.341   2
 -14  -6 -16 4168.28 192.980   1
  -6 -16 -14 4374.35 227.878   2
 -16  14   6 4473.98 190.645   1
  -4 -16 -14 1682.09 143.504   2
 -14  -4 -16 1585.48 121.324   1
 -16  14   4 1849.01 124.107   1
 -16  14   2 1884.99 129.928   1
  -2 -16 -14 2091.55 153.807   2
 -14  -2 -16 1957.86 136.780   1
 -16  14   0 2848.46 163.885   1
   0 -16 -14 3011.08 181.484   2
 -14   0 -16 3265.85 178.902   1
   2 -16 -14 2050.03 152.172   2
 -16  14  -2 1965.86 138.283   1
 -14   2 -16 2043.77 147.165   1
   4 -16 -14 2328.92 161.394   2
 -16  14  -4 2379.64 155.835   1
  -4  16 -14 2269.92 166.946   1
 -14   4 -16 2314.14 157.898   1
 -14   6 -16 4407.13 225.829   1
   6 -16 -14 4771.53 234.533   2
 -16  14  -6 4632.85 222.863   1
  -6  16 -14 4660.90 232.797   1
 -14   8 -16 2688.60 180.070   1
  -8  16 -14 2764.35 182.716   1
 -16  14  -8 2576.35 172.277   1
 -14  10 -16 6705.71 294.680   1
 -10  16 -14 6766.97 292.275   1
 -16  14 -10 6278.20 277.182   1
 -14  12 -16 3538.53 219.737   1
 -12  16 -14 3703.51 217.592   1
 -16  14 -12 3265.71 208.755   1
 -14  16 -14 23370.8 604.113   1
 -14  14 -16 21797.7 594.202   1
 -16  14 -14 22513.2 595.283   1
 -15 -16 -15 1845.59 179.679   2
 -15 -15 -16 2119.39 187.177   2
 -13 -16 -15 11198.5 415.189   2
 -11 -16 -15 2925.92 205.436   2
 -15 -11 -16 3183.24 157.197   1
 -15  -9 -16 3408.18 170.220   1
  -9 -16 -15 3398.18 211.324   2
 -15  -7 -16 760.672 87.3221   1
  -7 -16 -15 648.388 97.9747   2
 -16  15   7 798.526 84.0158   1
 -15  -5 -16 10600.2 326.969   1
  -5 -16 -15 10893.5 369.709   2
 -16  15   5 10621.0 308.570   1
 -16  15   3 61.6530 45.1393   1
 -15  -3 -16-71.8611 53.5727   1
  -3 -16 -15 42.0888 58.5308   2
 -16  15   1 1743.24 127.337   1
  -1 -16 -15 1718.29 144.150   2
 -15  -1 -16 1857.05 140.680   1
 -16  15  -1 2216.71 146.902   1
   1 -16 -15 1983.78 152.798   2
 -15   1 -16 2150.83 152.163   1
   3 -16 -15 94.7960 54.3020   2
  -3  16 -15 20.2568 45.0633   1
 -16  15  -3-20.8714 48.4087   1
 -15   3 -16 23.4003 50.8943   1
  -5  16 -15 10375.5 361.970   1
   5 -16 -15 10105.9 349.957   2
 -16  15  -5 9956.71 332.560   1
 -15   5 -16 10925.8 361.428   1
   7 -16 -15 700.885 98.8852   2
 -15   7 -16 817.522 105.086   1
  -7  16 -15 917.852 111.639   1
 -16  15  -7 827.473 106.535   1
 -15   9 -16 3457.87 211.373   1
 -16  15  -9 3392.22 202.030   1
  -9  16 -15 4099.11 229.192   1
 -11  16 -15 3165.84 206.116   1
 -15  11 -16 3416.56 215.596   1
 -16  15 -11 3113.49 201.384   1
 -15  13 -16 10624.3 397.493   1
 -13  16 -15 10868.4 397.729   1
 -16  15 -13 11315.0 404.072   1
 -15  16 -15 1859.59 167.189   1
 -16  15 -15 1560.51 153.403   1
 -15  15 -16 1970.34 173.470   1
 -14 -16 -16 6563.95 320.134   2
 -12 -16 -16 2536.05 197.235   2
 -10 -16 -16 7517.46 325.470   2
 -16 -10 -16 7081.01 255.492   1
 -16  -8 -16 30546.9 617.242   1
  -8 -16 -16 31080.7 708.155   2
 -16  -6 -16 3943.41 196.972   1
  -6 -16 -16 4334.84 235.381   2
 -16  16   6 4224.56 184.677   1
 -16  -4 -16 10935.9 344.815   1
  -4 -16 -16 11348.5 381.207   2
 -16  16   4 11010.3 318.716   1
 -16  -2 -16 9541.99 324.525   1
  -2 -16 -16 10031.4 349.503   2
 -16  16   2 9361.74 298.156   1
 -16  16   0 10457.7 322.960   1
   0 -16 -16 10735.7 360.536   2
 -16   0 -16 9933.93 338.427   1
   2 -16 -16 9379.43 337.488   2
  -2  16 -16 8710.10 337.598   1
 -16  16  -2 9281.84 309.499   1
 -16   2 -16 9174.25 328.734   1
   4 -16 -16 11406.6 375.487   2
 -16  16  -4 11203.4 354.504   1
  -4  16 -16 10687.1 378.265   1
 -16   4 -16 11453.0 374.505   1
 -16  16  -6 3952.60 211.767   1
  -6  16 -16 3884.02 223.953   1
   6 -16 -16 4049.27 224.000   2
 -16   6 -16 3675.45 214.924   1
  -8  16 -16 31689.3 710.979   1
 -16   8 -16 32416.8 715.286   1
 -10  16 -16 7153.64 313.048   1
 -16  16 -10 7357.95 305.761   1
 -16  10 -16 7581.24 322.725   1
 -12  16 -16 3076.79 210.978   1
 -16  16 -12 2972.66 201.869   1
 -16  12 -16 3070.48 210.220   1
 -14  16 -16 6663.34 316.153   1
 -16  16 -14 7124.92 322.054   1
 -16  14 -16 6246.53 310.300   1
  -1 -17   0 20994.5 425.207   2
   0  -1 -17 21430.3 393.221   2
   1 -17   0 20438.2 425.503   2
   0   1 -17 21582.5 367.665   2
  -1  17   0 20822.7 368.414   1
 -17   0   1 20788.6 468.646   1
 -17   0  -1 20203.7 464.368   1
 -17   0  -3 25574.6 532.904   1
   3 -17   0 25143.5 495.934   2
   0   3 -17 26391.7 394.839   2
  -3 -17   0 25473.9 488.220   2
   0  -3 -17 25163.8 470.342   2
  -3  17   0 25386.6 426.527   1
 -17   0   3 25819.4 538.192   1
   0   5 -17 29590.2 395.583   2
 -17   0  -5 28074.2 582.673   1
  -5  17   0 29703.7 482.773   1
   0  -5 -17 28368.1 536.351   2
  -5 -17   0 28702.8 538.671   2
 -17   0  -7 2008.27 137.208   1
   0  -7 -17 1915.95 122.308   2
  -7 -17   0 1752.87 112.890   2
   0  -7 -17 1908.60 95.2658   1
   7  17   0 1779.36 95.3817   1
  -7  17   0 2001.28 101.460   1
  -9 -17   0 14733.7 368.489   2
 -17   0  -9 15026.3 401.607   1
   0  -9 -17 14587.7 380.257   2
   0  -9 -17 15895.4 287.381   1
  -9  17   0 15332.0 336.118   1
   0 -11 -17 8260.63 158.713   1
   0 -11 -17 8088.24 284.585   2
 -17   0 -11 7833.49 283.952   1
 -11  17   0 8242.50 248.640   1
 -11 -17   0 8337.42 273.477   2
 -13  17   0 3456.97 165.913   1
   0 -13 -17 3416.20 188.936   2
 -17   0 -13 3521.89 192.232   1
   0 -15 -17 962.964 113.551   2
 -15  17   0 813.869 89.6865   1
 -17   0 -15 929.991 108.774   1
 -16  17   1 12891.4 360.288   1
  -1 -16 -17 11962.9 394.785   2
 -17  -1 -16 12270.5 386.358   1
 -14  17   1 4386.99 189.793   1
  -1 -14 -17 4654.13 228.431   2
 -17  -1 -14 4766.22 225.793   1
 -17  -1 -12 8664.23 299.702   1
 -12  17   1 8536.06 254.988   1
  -1 -12 -17 8136.37 293.786   2
 -17  -1 -10 8917.03 298.971   1
  -1 -10 -17 9325.56 188.538   1
  -1 -10 -17 8922.82 294.059   2
 -10 -17  -1 8435.27 279.029   2
 -10  17   1 9119.83 249.267   1
 -17  -1  -8 6303.65 243.806   1
  -1  -8 -17 6362.38 174.325   1
  -1  -8 -17 6148.07 228.970   2
  -8 -17  -1 6248.62 225.316   2
  -8  17   1 6722.64 193.723   1
 -17  -1  -6 2050.68 137.219   1
  -1  -6 -17 1998.95 101.965   1
  -1  -6 -17 2061.27 123.686   2
  -6 -17  -1 1954.58 120.113   2
  -6  17   1 1926.71 92.5140   1
  -4  17   1 1716.53 81.2909   1
   1   4 -17 1722.78 62.0590   2
  -4 -17  -1 1642.00 107.941   2
  -1  -4 -17 1702.80 105.112   2
  -1  -4 -17 1701.78 102.660   1
 -17   1   4 1675.46 125.134   1
 -17  -1  -4 1676.93 123.566   1
   2 -17   1 13938.3 329.576   2
  -2 -17  -1 13753.0 335.885   2
   1   2 -17 14030.0 263.532   2
  -1  -2 -17 14075.3 313.585   2
  -2  17   1 14543.6 269.713   1
 -17   1   2 14422.3 375.556   1
 -17  -1  -2 14170.1 369.882   1
   0 -17  -1 651.990 71.9696   2
   1   0 -17 593.390 52.4258   2
   0 -17   1 570.528 64.5443   2
  -1   0 -17 643.687 58.3713   2
   0  17  -1 630.850 57.8432   1
   0  17   1 638.694 47.6288   1
 -17  -1   0 668.764 85.2305   1
 -17   1   0 634.138 83.9134   1
   2 -17  -1 13545.7 334.691   2
  -2 -17   1 13919.1 319.689   2
   1  -2 -17 13979.5 301.792   2
  -1   2 -17 13497.3 267.872   2
 -17  -1   2 13696.4 366.375   1
  -2  17  -1 13331.4 285.027   1
 -17   1  -2 13691.7 363.910   1
   4 -17  -1 1316.46 100.392   2
 -17   1  -4 1367.52 113.188   1
  -1   4 -17 1523.96 64.8050   2
   1  -4 -17 1469.28 96.1967   2
  -4 -17   1 1427.25 96.4612   2
  -4  17  -1 1476.34 84.7031   1
 -17   1  -6 1842.33 134.614   1
  -6  17  -1 2120.83 105.531   1
  -1   6 -17 1995.87 56.3302   2
   1  -6 -17 2083.50 121.425   2
  -6 -17   1 1868.50 113.103   2
   1  -8 -17 6602.46 177.983   1
   1  -8 -17 6072.93 224.257   2
 -17   1  -8 6380.87 248.916   1
  -8 -17   1 6250.71 217.391   2
  -8  17  -1 6778.03 205.763   1
   8  17   1 6008.36 182.327   1
   1 -10 -17 9189.31 188.294   1
   1 -10 -17 8507.11 284.900   2
 -17   1 -10 8830.86 303.862   1
 -10 -17   1 8354.63 263.238   2
 -10  17  -1 8142.84 245.365   1
   1 -12 -17 7905.55 285.513   2
 -17   1 -12 7829.23 287.783   1
 -12  17  -1 8039.90 255.849   1
   1 -14 -17 4799.44 229.955   2
 -17   1 -14 4265.16 219.094   1
 -14  17  -1 4317.85 195.611   1
   1 -16 -17 11876.0 391.123   2
 -16  17  -1 11224.6 344.918   1
 -17   1 -16 11998.5 383.997   1
 -15  17   2 486.994 71.2756   1
  -2 -15 -17 483.376 87.5265   2
 -17  -2 -15 342.947 77.0408   1
  -2 -13 -17 2297.24 158.332   2
 -17  -2 -13 2226.99 153.368   1
 -13  17   2 2512.96 136.224   1
 -11  17   2 6894.12 213.137   1
 -17  -2 -11 6771.70 258.968   1
  -2 -11 -17 6631.61 258.168   2
 -11 -17  -2 6638.10 250.418   2
  -2 -11 -17 6873.64 143.592   1
  -2  -9 -17 12281.3 246.357   1
 -17  -2  -9 12225.3 349.270   1
  -9  17   2 12180.2 279.923   1
  -2  -9 -17 12355.2 346.792   2
  -9 -17  -2 11639.7 334.557   2
 -17  -2  -7 2395.90 147.242   1
  -7  17   2 2026.23 96.6998   1
  -7 -17  -2 2045.64 127.815   2
  -2  -7 -17 2196.28 132.293   2
  -2  -7 -17 2031.24 100.009   1
 -17  -2  -5 5008.57 211.605   1
  -5 -17  -2 5140.81 198.399   2
  -2  -5 -17 5298.66 196.596   2
  -5  17   2 5587.21 149.940   1
  -2  -5 -17 5568.69 179.963   1
   2   3 -17 8791.44 176.710   2
  -3 -17  -2 8249.89 256.150   2
  -2  -3 -17 8505.21 243.371   2
 -17   2   3 8763.06 283.203   1
 -17  -2  -3 8316.49 273.835   1
  -2  -3 -17 8672.16 246.531   1
  -3  17   2 9100.77 187.199   1
   1 -17   2 22169.7 435.209   2
   2   1 -17 22998.3 378.931   2
  -2  -1 -17 22803.6 425.209   2
  -1 -17  -2 22124.6 460.887   2
 -17  -2  -1 22240.2 492.682   1
 -17   2   1 21940.9 491.250   1
  -1  17   2 23164.3 352.649   1
  -2  -1 -17 22734.7 460.632   1
   1 -17  -2 22781.6 467.537   2
  -1 -17   2 22684.5 433.847   2
   2  -1 -17 22903.7 409.178   2
  -2   1 -17 23216.9 406.261   2
  -1  17  -2 22664.3 419.984   1
 -17  -2   1 22632.9 497.487   1
 -17   2  -1 22603.2 495.059   1
   1  17   2 23838.4 361.193   1
   3 -17  -2 8365.61 259.868   2
   2  -3 -17 8392.95 231.085   2
  -3 -17   2 8342.41 233.076   2
  -2   3 -17 8728.52 196.686   2
   3  17   2 8301.88 183.209   1
 -17   2  -3 8364.95 279.551   1
  -3  17  -2 8879.19 227.244   1
 -17   2  -5 5380.21 223.015   1
  -5 -17   2 5372.73 185.006   2
  -2   5 -17 5931.44 137.408   2
  -5  17  -2 5768.11 182.542   1
   2  -5 -17 5616.28 196.691   2
   5  17   2 5633.11 152.574   1
  -7  17  -2 1879.23 107.286   1
   2  -7 -17 2129.37 126.847   2
  -2   7 -17 1890.59 53.5773   2
 -17   2  -7 1835.29 132.003   1
  -7 -17   2 1993.54 114.354   2
 -17   2  -9 12112.4 361.091   1
   2  -9 -17 12460.1 343.342   2
  -9 -17   2 11878.9 310.778   2
  -9  17  -2 12717.8 310.756   1
   2  -9 -17 12440.1 256.820   1
   2 -11 -17 6889.00 147.289   1
   2 -11 -17 6689.30 254.058   2
 -11 -17   2 6609.79 231.111   2
 -11  17  -2 6800.24 229.294   1
 -17   2 -11 6678.47 267.251   1
   2 -13 -17 2380.07 159.399   2
 -13  17  -2 2455.10 145.142   1
 -17   2 -13 2334.05 161.019   1
   2 -15 -17 570.646 92.7533   2
 -15  17  -2 493.645 78.4476   1
 -17   2 -15 409.584 81.8608   1
  -2  15 -17 494.854 86.0550   1
  -3 -16 -17 3599.88 212.583   2
 -17  -3 -16 3450.79 193.419   1
 -16  17   3 3613.54 176.810   1
 -14  17   3 2196.60 128.456   1
  -3 -14 -17 2304.35 163.642   2
 -17  -3 -14 2241.57 154.345   1
 -12  17   3 473.122 59.6991   1
  -3 -12 -17 418.221 77.7550   2
 -17  -3 -12 295.939 68.7870   1
 -10  17   3 3580.11 141.576   1
 -17  -3 -10 3572.69 182.791   1
  -3 -10 -17 3600.47 185.393   2
 -10 -17  -3 3459.95 180.406   2
  -3 -10 -17 3722.48 113.499   1
  -8  17   3 9986.77 233.423   1
 -17  -3  -8 9892.39 306.821   1
  -3  -8 -17 10591.2 312.242   2
  -3  -8 -17 10360.7 232.646   1
  -8 -17  -3 10158.1 306.452   2
  -6 -17  -3 6178.29 226.072   2
  -6  17   3 5989.07 157.705   1
 -17  -3  -6 5920.14 230.285   1
  -3  -6 -17 5809.94 180.404   1
  -3  -6 -17 5810.28 215.521   2
  -4 -17  -3 3554.11 167.951   2
  -3  -4 -17 4013.74 167.541   2
  -4  17   3 4067.37 111.820   1
  -3  -4 -17 3780.58 152.262   1
 -17   3   4 4051.26 187.689   1
 -17  -3  -4 3928.54 184.690   1
  -3  -2 -17 21411.8 444.768   1
  -2 -17  -3 22090.4 468.451   2
  -3  -2 -17 21895.9 433.044   2
  -2  17   3 23093.2 333.729   1
 -17   3   2 22398.3 489.918   1
 -17  -3  -2 21915.1 487.628   1
 -17   3   0 1063.32 100.891   1
   0 -17   3 1007.99 77.4094   2
   3   0 -17 1056.84 68.7623   2
   0 -17  -3 1039.45 90.0430   2
   0  17   3 1066.14 47.0838   1
  -3   0 -17 996.508 74.0298   2
 -17  -3   0 1053.78 99.5864   1
  -3   0 -17 1133.41 94.5797   1
  -2  17  -3 22169.5 424.365   1
   3  -2 -17 22110.0 410.343   2
   2 -17  -3 21356.7 462.352   2
  -2 -17   3 21350.0 414.428   2
   2  17   3 22822.8 334.970   1
  -3   2 -17 21831.7 474.912   1
  -3   2 -17 22674.7 395.856   2
 -17  -3   2 21851.5 490.421   1
   2  17   3 22656.1 332.160   1
 -17   3  -2 22057.9 491.279   1
   4 -17  -3 4079.10 181.099   2
  -3   4 -17 3932.77 188.205   1
   3  -4 -17 4128.26 160.404   2
  -4 -17   3 4166.64 154.552   2
  -3   4 -17 4160.23 126.878   2
  -4  17  -3 4206.52 157.607   1
 -17   3  -4 3794.56 185.591   1
   4  17   3 4029.55 110.474   1
   3  -6 -17 6376.05 216.424   2
   6  17   3 6385.58 159.689   1
 -17   3  -6 6374.65 244.799   1
  -6 -17   3 6317.95 199.510   2
  -6  17  -3 6476.68 205.608   1
  -3   6 -17 6573.79 147.357   2
   3  -8 -17 10244.7 300.664   2
  -3   8 -17 10751.1 172.517   2
  -8 -17   3 10761.9 277.623   2
  -8  17  -3 10083.7 277.188   1
 -17   3  -8 10193.0 327.980   1
  -3  10 -17 3582.94 198.652   1
   3 -10 -17 3683.67 180.411   2
 -17   3 -10 3588.82 191.017   1
 -10 -17   3 3501.30 157.274   2
 -10  17  -3 3609.09 164.368   1
   3 -12 -17 328.107 63.3579   2
 -17   3 -12 361.470 78.7386   1
 -12  17  -3 367.707 64.0330   1
  -3  12 -17 391.800 77.9127   1
   3 -14 -17 2437.47 165.395   2
 -14  17  -3 2112.55 140.399   1
 -17   3 -14 2107.37 157.153   1
  -3  14 -17 2275.92 170.133   1
   3 -16 -17 3104.10 196.929   2
  -3  16 -17 3493.04 217.073   1
 -16  17  -3 2962.65 177.768   1
 -17   3 -16 3543.88 207.120   1
 -17  -4 -15 6472.62 261.276   1
  -4 -15 -17 6684.90 286.133   2
 -15  17   4 6626.95 233.692   1
 -17  -4 -13 2061.84 145.806   1
  -4 -13 -17 2071.81 152.821   2
 -13  17   4 2172.82 120.235   1
  -4 -11 -17 18226.6 468.775   2
  -4 -11 -17 20062.0 316.107   1
 -17  -4 -11 19445.4 463.134   1
 -11 -17  -4 18179.5 466.554   2
 -11  17   4 18959.7 381.973   1
 -17  -4  -9 4037.70 192.004   1
  -4  -9 -17 3990.54 193.518   2
  -9  17   4 4168.36 140.995   1
  -9 -17  -4 4222.47 197.533   2
  -4  -9 -17 4306.90 134.852   1
 -17  -4  -7 10881.3 322.242   1
  -4  -7 -17 10944.6 253.801   1
  -4  -7 -17 10738.6 312.669   2
  -7 -17  -4 10848.0 320.242   2
  -7  17   4 11081.7 226.820   1
  -5  17   4 715.391 45.5125   1
  -4  -5 -17 651.709 64.9087   1
  -5 -17  -4 898.558 89.1576   2
  -4  -5 -17 784.298 81.4691   2
 -17   4   5 663.593 81.8120   1
 -17  -4  -5 808.809 88.5305   1
  -3  17   4 34217.0 446.929   1
  -3 -17  -4 31944.8 613.821   2
  -4  -3 -17 32601.7 576.859   1
  -4  -3 -17 33056.6 590.146   2
 -17   4   3 32817.6 634.118   1
 -17  -4  -3 32569.4 629.911   1
  -1 -17  -4 150.957 48.0191   2
  -1  17   4 223.053 17.6614   1
  -4  -1 -17 268.303 50.0506   1
  -4  -1 -17 174.857 40.9173   2
 -17  -4  -1 217.038 57.8621   1
 -17   4   1 231.619 58.5056   1
 -17   4  -1 325.665 65.8514   1
   1  17   4 320.573 19.9854   1
   4  -1 -17 296.820 41.9928   2
   1 -17  -4 349.678 59.5558   2
  -4   1 -17 473.981 68.9723   1
  -1  17  -4 407.986 57.6639   1
  -4   1 -17 327.461 47.1450   2
 -17  -4   1 388.598 73.4711   1
  -1 -17   4 406.896 52.8123   2
   4  -3 -17 31412.2 545.061   2
   3 -17  -4 31523.0 606.753   2
 -17   4  -3 31745.4 625.962   1
  -3 -17   4 32812.5 535.036   2
  -4   3 -17 31892.6 518.946   2
  -3  17  -4 31523.3 560.994   1
   3  17   4 32694.7 432.933   1
  -4   3 -17 31671.1 618.485   1
   3  17   4 32661.4 430.921   1
  -4   5 -17 245.380 59.4584   1
  -5  17  -4 393.313 56.9989   1
   4  -5 -17 311.329 51.7510   2
   5  17   4 433.306 34.4138   1
   5 -17  -4 460.977 70.5174   2
 -17   4  -5 396.347 73.3020   1
  -5 -17   4 359.283 48.9565   2
   4  -7 -17 12034.0 318.023   2
   7  17   4 11499.1 231.696   1
 -17   4  -7 11548.8 349.369   1
  -7 -17   4 11712.6 281.138   2
  -7  17  -4 11968.0 304.801   1
  -4   7 -17 11782.3 354.813   1
  -9  17  -4 3458.92 160.881   1
   4  -9 -17 3484.29 171.785   2
 -17   4  -9 3788.61 195.300   1
  -4   9 -17 3510.53 192.335   1
  -9 -17   4 3572.23 149.919   2
  -4  11 -17 19232.3 499.949   1
 -11 -17   4 18812.1 410.994   2
 -11  17  -4 19178.6 437.117   1
   4 -11 -17 19175.4 461.540   2
 -17   4 -11 18719.2 480.266   1
   4 -13 -17 2234.38 152.765   2
 -17   4 -13 2276.59 159.133   1
 -13  17  -4 2096.17 137.604   1
  -4  13 -17 2153.62 163.341   1
   4 -15 -17 5968.48 267.660   2
 -15  17  -4 6253.20 253.494   1
 -17   4 -15 6194.54 274.422   1
  -4  15 -17 6076.48 282.452   1
 -17  -5 -16 2556.31 164.131   1
  -5 -16 -17 2711.60 186.661   2
 -16  17   5 2658.02 148.222   1
 -17  -5 -14 256.936 63.5620   1
  -5 -14 -17 277.112 66.4881   2
 -14  17   5 329.528 54.2238   1
 -17  -5 -12 4681.07 211.141   1
  -5 -12 -17 4954.21 231.936   2
 -12  17   5 4911.54 171.891   1
 -17  -5 -10 4939.07 216.005   1
  -5 -10 -17 5337.05 230.291   2
  -5 -10 -17 5518.59 150.409   1
 -10 -17  -5 5116.96 227.992   2
 -10  17   5 5426.83 165.935   1
 -17  -5  -8 1381.61 114.189   1
  -5  -8 -17 1493.22 83.6731   1
  -5  -8 -17 1441.41 116.165   2
  -8 -17  -5 1498.34 119.699   2
  -8  17   5 1502.50 74.7329   1
  -5  -6 -17 2119.42 108.941   1
  -6 -17  -5 2294.34 143.148   2
  -5  -6 -17 2102.15 133.525   2
 -17   5   6 2195.08 140.347   1
  -6  17   5 2341.68 78.4454   1
 -17  -5  -6 2357.28 142.705   1
  -4 -17  -5 8550.77 276.087   2
  -5  -4 -17 8690.96 261.913   2
 -17   5   4 8901.92 283.835   1
 -17  -5  -4 8056.56 270.382   1
  -5  -4 -17 8731.43 243.346   1
  -4  17   5 8515.07 142.878   1
  -2 -17  -5 32.2766 42.1585   2
  -5  -2 -17-36.3960 37.7569   1
  -5  -2 -17 11.1553 34.4057   2
 -17  -5  -2-9.47194 49.8987   1
 -17   5   2 0.57351 45.1116   1
   0 -17  -5 8803.97 275.218   2
  -5   0 -17 8976.37 269.838   1
 -17  -5   0 8850.92 284.870   1
 -17   5   0 8549.44 279.720   1
  -2  17  -5 17.6291 33.2432   1
  -2 -17   5-0.85486 24.4576   2
 -17   5  -2 54.1846 46.2715   1
   5  -2 -17-27.7939 34.1625   2
  -5   2 -17-11.9372 40.3058   1
  -2  17  -5 57.9551 26.2196   2
   2 -17  -5-7.84608 36.2205   2
  -4 -17   5 9148.56 224.643   2
   4 -17  -5 9100.22 287.833   2
 -17   5  -4 9011.06 295.116   1
  -5   4 -17 8818.82 289.871   1
  -4  17  -5 9016.37 260.862   1
   5  -4 -17 9455.68 255.855   2
   4  17   5 8545.24 141.950   1
   5  -6 -17 2240.24 128.531   2
  -6 -17   5 2402.11 112.093   2
 -17   5  -6 2479.90 155.044   1
  -5   6 -17 2512.37 157.600   1
   6  17   5 2467.36 78.3132   1
  -6  17  -5 2536.15 133.478   1
   5  -8 -17 1318.54 106.634   2
  -8  17  -5 1365.20 103.754   1
  -8 -17   5 1520.77 91.3251   2
 -17   5  -8 1645.31 129.747   1
  -5   8 -17 1358.69 121.883   1
   5  -8 -17 1659.84 89.2520   1
   5 -10 -17 5007.68 218.067   2
  -5  10 -17 5514.39 248.838   1
 -10 -17   5 5461.89 186.646   2
 -17   5 -10 5343.85 238.380   1
 -10  17  -5 5326.25 210.520   1
  -5  12 -17 5024.48 242.158   1
 -17   5 -12 4888.87 232.377   1
 -12 -17   5 4890.09 185.563   2
   5 -12 -17 4648.45 220.025   2
 -12  17  -5 4778.96 207.063   1
  -5  14 -17 259.598 77.2220   1
   5 -14 -17 234.853 69.5205   2
 -14  17  -5 174.455 54.3073   1
 -17   5 -14 320.039 81.1657   1
  -5  16 -17 2693.72 191.112   1
   5 -16 -17 3015.33 195.990   2
 -16  17  -5 2397.96 165.729   1
 -17   5 -16 2936.62 193.017   1
 -17  -6 -15 1939.63 142.829   1
  -6 -15 -17 2492.15 179.827   2
 -15  17   6 2240.75 128.394   1
 -17  -6 -13 5624.12 233.276   1
  -6 -13 -17 5763.99 259.504   2
 -13  17   6 5937.20 194.567   1
 -17  -6 -11 2916.52 164.242   1
  -6 -11 -17 2861.89 103.812   1
  -6 -11 -17 2924.89 179.048   2
 -11 -17  -6 2882.75 175.127   2
 -11  17   6 2787.62 119.470   1
 -17  -6  -9 746.210 89.8457   1
  -6  -9 -17 756.973 89.8157   2
  -9 -17  -6 785.980 93.9646   2
  -6  -9 -17 910.327 66.7712   1
  -9  17   6 930.381 60.7249   1
  -6  -7 -17 2059.59 105.297   1
  -7 -17  -6 2177.28 144.287   2
  -6  -7 -17 2020.09 135.381   2
  -7  17   6 2129.72 76.3689   1
 -17  -6  -7 2111.82 136.910   1
  -6  -5 -17 16518.9 356.624   1
  -5 -17  -6 17087.9 419.976   2
  -6  -5 -17 16993.2 405.758   2
 -17   6   5 16406.4 409.848   1
 -17  -6  -5 17079.5 414.071   1
  -3 -17  -6 8658.69 283.144   2
  -6  -3 -17 9033.15 256.161   1
 -17  -6  -3 9195.16 287.133   1
 -17   6   3 8819.72 284.386   1
  -6  -1 -17 18517.5 410.814   1
  -1 -17  -6 18272.9 434.639   2
 -17  -6  -1 18738.4 440.815   1
 -17   6   1 18811.8 440.512   1
 -17   6  -1 19192.2 448.435   1
   1 -17  -6 18538.2 437.160   2
  -6   1 -17 18653.8 426.846   1
   3 -17  -6 9176.64 291.100   2
  -3 -17   6 9329.25 221.528   2
 -17   6  -3 9522.22 302.542   1
  -3  17  -6 9634.20 277.700   1
  -3  17  -6 9886.25 243.856   2
  -6   3 -17 9100.62 289.771   1
   6  -5 -17 16698.0 375.780   2
   5 -17  -6 17490.8 427.814   2
  -5 -17   6 16895.1 325.434   2
  -5  17  -6 16615.9 386.078   1
 -17   6  -5 16817.2 427.557   1
  -6   5 -17 16294.7 419.602   1
   6  -7 -17 2261.53 132.472   2
  -7 -17   6 2237.89 104.544   2
 -17   6  -7 2284.05 152.026   1
  -7  17  -6 2186.02 131.960   1
  -6   7 -17 2213.63 152.929   1
   6  -9 -17 835.687 91.1826   2
  -9  17  -6 812.990 86.0235   1
  -9 -17   6 811.381 68.6062   2
  -6   9 -17 766.292 95.9315   1
 -17   6  -9 709.668 93.9265   1
 -11  17  -6 2511.59 149.874   1
   6 -11 -17 2477.31 156.395   2
 -11 -17   6 2651.57 127.306   2
 -17   6 -11 2563.50 172.553   1
  -6  11 -17 2446.74 167.648   1
 -13 -17   6 5954.66 206.311   2
 -17   6 -13 6029.64 265.178   1
 -13  17  -6 5886.34 241.542   1
  -6  13 -17 5767.17 267.322   1
   6 -13 -17 5976.51 256.366   2
   6 -15 -17 1974.94 157.239   2
 -15  17  -6 2156.95 154.773   1
  -6  15 -17 2324.66 174.072   1
 -17   6 -15 2267.70 170.381   1
 -17  -7 -16 23578.6 538.622   1
  -7 -16 -17 24575.8 614.459   2
 -17  -7 -14 5326.13 229.017   1
  -7 -14 -17 5445.28 258.120   2
 -14  17   7 5346.22 189.239   1
 -17  -7 -12 12172.7 352.420   1
  -7 -12 -17 12717.5 390.868   2
 -12 -17  -7 12429.0 393.023   2
 -12  17   7 12693.6 285.127   1
  -7 -10 -17 4640.75 149.054   1
  -7 -10 -17 4704.53 219.944   2
 -10 -17  -7 4499.65 220.354   2
 -17  -7 -10 4410.35 198.217   1
  -8 -17  -7 8536.34 301.051   2
  -7  -8 -17 9965.11 315.302   2
  -7  -8 -17 9113.20 234.609   1
 -17  -7  -8 9338.97 294.311   1
  -7  -6 -17 18940.8 384.016   1
  -6 -17  -7 18381.4 455.439   2
  -7  -6 -17 18507.1 440.424   2
 -17   7   6 18271.2 437.673   1
 -17  -7  -6 18068.2 432.437   1
  -7  -4 -17 3399.97 150.749   1
  -4 -17  -7 3424.67 178.250   2
 -17  -7  -4 3514.64 174.144   1
 -17   7   4 3461.44 174.227   1
  -2 -17  -7 27582.8 571.468   2
  -7  -2 -17 27890.7 532.515   1
 -17  -7  -2 28019.8 566.739   1
 -17   7   2 27759.5 567.093   1
 -17   7   0 4548.01 203.766   1
   0 -17  -7 4505.36 200.881   2
  -7   0 -17 4526.29 190.319   1
  -7   2 -17 27989.4 562.971   1
 -17   7  -2 27406.1 572.493   1
  -2  17  -7 27966.8 547.732   1
   2 -17  -7 27514.4 570.330   2
  -4 -17   7 3041.50 109.919   2
 -17   7  -4 2887.01 165.896   1
  -7   4 -17 2874.45 163.055   1
  -4  17  -7 3148.20 128.722   2
   4 -17  -7 2874.92 162.998   2
  -4  17  -7 3071.46 155.291   1
  -6  17  -7 18353.1 424.552   1
  -6 -17   7 18471.6 337.099   2
 -17   7  -6 18927.4 464.692   1
  -7   6 -17 17791.1 453.173   1
   6 -17  -7 17920.9 450.307   2
   7  -8 -17 9157.38 287.324   2
  -8 -17   7 9903.66 229.694   2
 -17   7  -8 9500.62 322.254   1
  -7   8 -17 9742.60 327.014   1
  -8  17  -7 9181.94 289.048   1
   7 -10 -17 4153.94 198.808   2
 -10  17  -7 4530.53 202.890   1
 -10 -17   7 4583.27 157.009   2
  -7  10 -17 4455.60 226.037   1
 -17   7 -10 4669.37 225.774   1
  -7  12 -17 12889.7 405.694   1
 -12 -17   7 12832.7 301.602   2
 -17   7 -12 12495.2 394.383   1
   7 -12 -17 12761.0 381.286   2
 -12  17  -7 12359.4 363.938   1
   7 -14 -17 5394.95 253.076   2
  -7  14 -17 5824.82 273.036   1
 -17   7 -14 5891.96 268.124   1
 -14  17  -7 5370.83 239.614   1
  -7  16 -17 24907.0 633.748   1
   7 -16 -17 25871.4 625.431   2
 -16  17  -7 24275.8 586.613   1
 -17   7 -16 26307.9 633.440   1
 -17  -8 -15 8161.15 288.814   1
  -8 -15 -17 8890.96 346.624   2
 -17  -8 -13 2740.98 159.222   1
  -8 -13 -17 2397.51 174.361   2
  -8 -11 -17 2153.79 97.8749   1
  -8 -11 -17 2123.42 154.409   2
 -11 -17  -8 2184.15 158.002   2
 -17  -8 -11 2088.97 139.320   1
  -8  -9 -17 11766.0 275.067   1
  -9 -17  -8 11344.9 361.361   2
  -8  -9 -17 12040.7 366.393   2
 -17  -8  -9 11570.7 333.390   1
  -7 -17  -8 8042.43 291.939   2
  -8  -7 -17 7763.92 226.637   1
 -17  -8  -7 8299.43 271.718   1
  -8  -5 -17 11323.2 292.135   1
  -5 -17  -8 11370.8 344.221   2
 -17  -8  -5 11315.4 325.253   1
 -17   8   5 11293.7 326.852   1
  -8  -3 -17 5783.00 206.022   1
  -3 -17  -8 6322.37 245.818   2
 -17  -8  -3 6179.68 235.047   1
 -17   8   3 6194.46 234.336   1
  -1 -17  -8 12806.2 363.111   2
  -8  -1 -17 12895.3 337.691   1
 -17   8   1 13267.0 362.079   1
 -17   8  -1 12662.3 355.764   1
   1 -17  -8 12956.2 363.332   2
  -8   1 -17 12907.1 347.072   1
   3 -17  -8 6250.75 243.805   2
 -17   8  -3 6105.04 242.967   1
  -3  17  -8 6620.38 182.666   2
  -3  17  -8 5956.76 227.361   1
  -8   3 -17 5707.11 232.031   1
  -5 -17   8 12074.3 235.679   2
 -17   8  -5 11612.2 351.671   1
  -5  17  -8 11464.3 327.995   1
  -8   5 -17 11594.6 348.184   1
   5 -17  -8 11200.5 342.090   2
  -8   7 -17 7619.85 286.455   1
  -7 -17   8 8393.79 191.455   2
 -17   8  -7 7993.28 292.264   1
  -7  17  -8 7641.78 266.072   1
  -9 -17   8 12406.3 256.865   2
  -9  17  -8 11718.2 345.565   1
 -17   8  -9 11642.7 367.554   1
  -8   9 -17 11326.1 366.383   1
 -11  17  -8 1906.66 138.712   1
 -11 -17   8 2079.92 103.382   2
  -8  11 -17 1931.90 154.586   1
 -17   8 -11 1927.29 150.207   1
  -8  13 -17 2463.92 177.974   1
 -17   8 -13 2455.70 172.623   1
 -13  17  -8 2574.77 167.124   1
  -8  15 -17 8629.79 342.214   1
 -15  17  -8 7800.30 305.565   1
 -17   8 -15 8828.23 342.414   1
 -17  -9 -16 3068.10 171.549   1
  -9 -16 -17 2943.62 203.674   2
  -9 -14 -17 6049.71 282.332   2
 -17  -9 -14 5970.79 237.572   1
  -9 -12 -17 32.6271 57.9384   2
 -12 -17  -9 107.996 58.0516   2
 -17  -9 -12 120.414 52.4549   1
  -9 -10 -17 4907.46 165.087   1
 -10 -17  -9 4955.33 238.568   2
  -9 -10 -17 5011.62 238.130   2
 -17  -9 -10 4689.32 203.054   1
  -8 -17  -9 5632.17 250.069   2
  -9  -8 -17 6012.02 196.984   1
 -17  -9  -8 6451.20 238.350   1
  -6 -17  -9 4347.60 211.741   2
 -17   9   6 4016.65 189.274   1
 -17  -9  -6 3877.75 183.032   1
  -9  -6 -17 3896.92 162.327   1
  -9  -4 -17 6528.70 220.756   1
  -4 -17  -9 6279.38 251.909   2
 -17  -9  -4 6431.15 238.924   1
 -17   9   4 6376.61 240.240   1
 -17   9   2 450.981 72.6649   1
  -2 -17  -9 353.466 69.7930   2
  -9  -2 -17 436.980 65.6805   1
   0 -17  -9 4169.29 199.997   2
  -9   0 -17 4070.31 183.024   1
 -17   9   0 4199.96 196.291   1
 -17   9  -2 368.777 74.2978   1
   2 -17  -9 458.752 75.5117   2
  -2  17  -9 411.035 66.3913   1
  -9   2 -17 318.140 60.8675   1
   4 -17  -9 6391.84 253.105   2
  -4  17  -9 6251.98 239.425   1
  -4  17  -9 6830.73 186.136   2
 -17   9  -4 6146.34 247.833   1
  -9   4 -17 6029.04 242.521   1
   6 -17  -9 3725.43 196.469   2
  -6 -17   9 4207.51 116.045   2
  -6  17  -9 4172.28 196.513   1
 -17   9  -6 3916.28 202.097   1
  -9   6 -17 4134.77 204.936   1
  -8 -17   9 6326.08 155.181   2
 -17   9  -8 6233.56 263.174   1
  -8  17  -9 6202.40 245.507   1
  -9   8 -17 5707.29 252.901   1
 -10  17  -9 4780.15 219.329   1
 -17   9 -10 4635.12 229.039   1
  -9  10 -17 4608.11 231.757   1
 -17   9 -12 83.5256 57.7816   1
 -12  17  -9 71.9006 51.8628   1
 -17   9 -14 5580.04 267.813   1
 -14  17  -9 5355.54 249.616   1
  -9  14 -17 5687.31 273.396   1
 -16  17  -9 2587.20 181.617   1
 -17   9 -16 2619.60 191.841   1
  -9  16 -17 2647.68 192.523   1
 -10 -15 -17 5546.17 279.169   2
 -17 -10 -15 5335.69 224.121   1
 -10 -13 -17 4947.55 257.540   2
 -13 -17 -10 5563.58 272.152   2
 -17 -10 -13 5504.88 224.906   1
 -10 -11 -17 1912.80 101.161   1
 -11 -17 -10 2153.01 164.451   2
 -10 -11 -17 1669.45 145.044   2
 -17 -10 -11 1882.60 130.075   1
 -10  -9 -17 3122.88 140.695   1
  -9 -17 -10 3216.81 190.392   2
 -17 -10  -9 2956.24 159.960   1
  -7 -17 -10 6242.16 260.936   2
 -10  -7 -17 5927.63 205.703   1
 -17  10   7 5579.14 224.078   1
 -17 -10  -7 5868.18 227.149   1
  -5 -17 -10 5474.89 241.637   2
 -17  10   5 5313.42 216.078   1
 -10  -5 -17 5091.80 195.171   1
 -10  -3 -17 2492.19 139.862   1
  -3 -17 -10 2813.73 171.448   2
 -17  10   3 2551.68 151.982   1
 -17  10   1 23438.8 516.568   1
 -10  -1 -17 23734.0 501.488   1
  -1 -17 -10 23209.5 535.347   2
 -17  10  -1 23482.3 522.353   1
 -10   1 -17 24004.4 516.255   1
   1 -17 -10 23452.2 533.649   2
  -3  17 -10 2588.52 157.932   1
   3 -17 -10 2538.76 161.178   2
 -17  10  -3 2609.17 160.131   1
 -10   3 -17 2758.51 162.135   1
 -17  10  -5 5669.64 245.960   1
 -10   5 -17 6030.20 249.622   1
  -5  17 -10 5624.00 235.229   1
   5 -17 -10 6034.40 251.825   2
  -7  17 -10 5782.95 240.691   1
   7 -17 -10 6118.70 256.635   2
 -17  10  -7 6207.21 258.596   1
 -10   7 -17 5916.21 254.014   1
 -17  10  -9 3099.91 188.701   1
  -9  17 -10 2790.24 169.850   1
 -10   9 -17 2804.79 179.961   1
 -11  17 -10 2146.38 152.930   1
 -17  10 -11 2229.13 164.072   1
 -10  11 -17 2212.20 162.826   1
 -13  17 -10 5051.13 242.927   1
 -17  10 -13 5521.09 264.718   1
 -10  13 -17 5515.28 268.422   1
 -10  15 -17 5295.59 269.883   1
 -17  10 -15 5180.76 266.141   1
 -15  17 -10 4891.02 249.826   1
 -11 -16 -17 45.6375 54.5722   2
 -11 -14 -17 644.953 105.654   2
 -14 -17 -11 725.534 112.067   2
 -17 -11 -14 943.150 93.2445   1
 -12 -17 -11 14265.0 447.370   2
 -11 -12 -17 13232.2 433.131   2
 -17 -11 -12 14171.4 372.703   1
 -11 -10 -17 2872.93 135.282   1
 -10 -17 -11 3170.23 197.908   2
 -17 -11 -10 2854.88 157.907   1
 -11  -8 -17 9257.82 264.248   1
  -8 -17 -11 8674.92 322.239   2
 -17 -11  -8 8282.11 275.590   1
  -6 -17 -11 8309.81 306.865   2
 -11  -6 -17 7915.50 249.420   1
 -17  11   6 7727.94 266.282   1
  -4 -17 -11 10077.9 335.867   2
 -11  -4 -17 10316.5 297.368   1
 -17  11   4 10334.5 310.906   1
  -2 -17 -11 19224.9 483.062   2
 -17  11   2 18268.0 445.184   1
 -11  -2 -17 19217.3 438.955   1
 -17  11   0 136.369 56.5264   1
 -11   0 -17 237.775 61.2858   1
   0 -17 -11 134.754 51.9151   2
 -17  11  -2 19767.4 476.719   1
   2 -17 -11 20277.5 496.246   2
 -11   2 -17 20800.3 482.442   1
  -2  17 -11 19291.8 482.047   1
   4 -17 -11 10773.3 343.670   2
 -17  11  -4 10243.4 334.894   1
  -4  17 -11 10587.4 338.286   1
 -11   4 -17 10916.5 341.806   1
 -17  11  -6 8243.43 301.970   1
  -6  17 -11 8264.63 296.606   1
 -11   6 -17 8236.24 301.907   1
   6 -17 -11 8517.10 310.057   2
 -11   8 -17 9081.44 325.183   1
 -17  11  -8 8718.57 318.312   1
  -8  17 -11 8407.04 303.814   1
 -10  17 -11 2892.72 179.668   1
 -11  10 -17 2927.45 190.885   1
 -17  11 -10 2987.87 188.976   1
 -12  17 -11 12782.3 403.560   1
 -11  12 -17 13296.8 427.800   1
 -17  11 -12 14324.7 436.254   1
 -14  17 -11 942.958 112.046   1
 -11  14 -17 1180.22 132.818   1
 -17  11 -14 1123.21 129.703   1
 -11  16 -17 22.0780 59.0085   1
 -16  17 -11 43.9418 58.1752   1
 -17  11 -16-14.0425 72.7964   1
 -12 -15 -17 149.442 70.7782   2
 -15 -17 -12 116.443 64.2021   2
 -13 -17 -12 6838.05 310.228   2
 -12 -13 -17 6731.63 309.935   2
 -17 -12 -13 7159.60 250.551   1
 -11 -17 -12 18003.2 506.297   2
 -17 -12 -11 16940.6 413.642   1
 -12  -9 -17 915.110 83.5785   1
  -9 -17 -12 838.035 109.873   2
 -12  -7 -17 8517.23 264.562   1
  -7 -17 -12 9009.44 329.706   2
 -17  12   7 8079.56 274.268   1
  -5 -17 -12 1952.61 150.525   2
 -12  -5 -17 2296.59 136.231   1
 -17  12   5 2301.54 143.636   1
  -3 -17 -12 16.1757 48.3197   2
 -12  -3 -17 113.084 46.6919   1
 -17  12   3 26.5949 44.0970   1
 -17  12   1 9513.84 307.437   1
  -1 -17 -12 9975.23 335.541   2
 -12  -1 -17 10346.5 314.029   1
 -17  12  -1 10679.4 329.655   1
   1 -17 -12 10874.8 349.599   2
 -12   1 -17 10441.7 328.189   1
  -3  17 -12 4.78808 49.7511   1
   3 -17 -12-19.7017 53.2622   2
 -12   3 -17 20.5132 41.0135   1
 -17  12  -3 22.0450 51.0206   1
 -12   5 -17 1864.03 143.273   1
 -17  12  -5 2134.95 151.307   1
  -5  17 -12 1697.15 137.011   1
   5 -17 -12 2110.91 155.160   2
   7 -17 -12 8869.35 320.991   2
  -7  17 -12 7683.76 296.420   1
 -12   7 -17 8042.17 307.911   1
 -17  12  -7 8485.45 311.288   1
 -12   9 -17 813.324 106.178   1
 -17  12  -9 696.145 101.166   1
  -9  17 -12 683.153 98.6404   1
 -11  17 -12 17029.2 474.988   1
 -12  11 -17 17263.5 492.876   1
 -17  12 -11 17226.5 485.479   1
 -13  17 -12 6547.15 289.128   1
 -12  13 -17 7241.39 312.841   1
 -17  12 -13 6518.40 296.934   1
 -15  17 -12 105.124 71.6890   1
 -12  15 -17 100.834 71.7485   1
 -17  12 -15 300.630 87.2185   1
 -13 -16 -17 9959.32 402.277   2
 -16 -17 -13 10294.2 409.732   2
 -13 -14 -17 3536.49 229.233   2
 -14 -17 -13 3772.78 240.146   2
 -12 -17 -13 992.759 124.311   2
 -17 -13 -12 1071.76 96.9168   1
 -13 -10 -17 1563.99 108.326   1
 -10 -17 -13 1982.05 163.351   2
 -13  -8 -17 11281.7 313.943   1
  -8 -17 -13 11204.4 382.029   2
  -6 -17 -13 2106.84 159.741   2
 -13  -6 -17 2572.52 146.446   1
 -17  13   6 2298.39 141.685   1
  -4 -17 -13 6108.64 264.993   2
 -13  -4 -17 6011.63 231.626   1
 -17  13   4 5653.81 226.025   1
  -2 -17 -13 5780.72 257.139   2
 -13  -2 -17 5597.33 229.350   1
 -17  13   2 5460.69 224.306   1
 -13   0 -17 18.3924 40.1089   1
 -17  13   0 111.613 53.4598   1
   0 -17 -13 46.8411 54.0586   2
   2 -17 -13 5653.40 250.157   2
 -17  13  -2 5415.83 232.957   1
  -2  17 -13 5597.94 252.045   1
 -13   2 -17 5226.48 233.969   1
 -13   4 -17 5544.02 246.184   1
   4 -17 -13 5632.50 251.762   2
 -17  13  -4 5463.48 242.777   1
  -4  17 -13 5598.30 253.459   1
   6 -17 -13 2325.69 166.219   2
 -13   6 -17 2514.80 171.913   1
 -17  13  -6 2507.82 168.796   1
  -6  17 -13 2297.88 164.535   1
 -13   8 -17 11489.7 380.976   1
 -17  13  -8 10716.5 364.641   1
  -8  17 -13 11221.9 370.676   1
 -13  10 -17 1632.79 147.303   1
 -10  17 -13 1720.61 148.416   1
 -17  13 -10 1704.99 148.544   1
 -12  17 -13 1049.36 122.524   1
 -13  12 -17 984.816 123.545   1
 -17  13 -12 909.449 116.501   1
 -14  17 -13 3861.01 229.288   1
 -13  14 -17 3879.06 232.706   1
 -17  13 -14 3722.66 231.090   1
 -13  16 -17 10502.8 403.041   1
 -17  13 -16 10848.9 411.552   1
 -16  17 -13 10583.0 399.421   1
 -14 -15 -17 2402.02 195.493   2
 -15 -17 -14 2843.26 213.491   2
 -13 -17 -14 1826.03 169.152   2
 -11 -17 -14 1335.27 141.964   2
 -14  -9 -17 211.775 50.6066   1
  -9 -17 -14 239.193 69.4064   2
 -14  -7 -17 2036.03 134.266   1
  -7 -17 -14 2060.17 165.967   2
 -17  14   7 1856.61 127.493   1
  -5 -17 -14 3212.68 197.445   2
 -14  -5 -17 3175.79 173.112   1
 -17  14   5 2925.96 162.275   1
  -3 -17 -14 3543.41 204.385   2
 -14  -3 -17 3315.45 177.538   1
 -17  14   3 3141.81 169.628   1
 -17  14   1 1621.00 126.596   1
  -1 -17 -14 1404.22 129.579   2
 -14  -1 -17 1535.52 125.949   1
 -17  14  -1 1959.60 139.916   1
   1 -17 -14 1792.11 147.434   2
 -14   1 -17 1853.98 141.211   1
  -3  17 -14 3099.25 193.392   1
 -17  14  -3 3165.62 182.317   1
   3 -17 -14 3472.44 199.296   2
 -14   3 -17 3424.71 196.265   1
 -14   5 -17 2981.26 188.853   1
   5 -17 -14 3326.32 200.384   2
 -17  14  -5 3106.53 186.723   1
  -5  17 -14 2800.58 183.881   1
   7 -17 -14 1499.69 143.192   2
 -14   7 -17 1606.66 143.418   1
  -7  17 -14 1926.25 155.348   1
 -17  14  -7 2042.33 157.727   1
  -9  17 -14 211.339 66.2665   1
 -14   9 -17 153.835 59.6879   1
 -17  14  -9 135.881 67.5480   1
 -14  11 -17 1327.95 140.306   1
 -11  17 -14 1493.74 142.080   1
 -17  14 -11 1353.08 138.661   1
 -14  13 -17 1592.42 156.013   1
 -13  17 -14 1858.40 162.414   1
 -17  14 -13 1543.01 149.774   1
 -14  15 -17 3055.07 217.231   1
 -17  14 -15 2943.03 214.031   1
 -15  17 -14 2580.05 193.057   1
 -14 -17 -15 3732.37 245.057   2
 -15 -14 -17 4123.43 257.135   2
 -12 -17 -15 12154.6 434.779   2
 -15 -10 -17 2904.06 156.278   1
 -10 -17 -15 3103.91 209.675   2
 -15  -8 -17 19347.1 453.046   1
  -8 -17 -15 19124.3 534.386   2
  -6 -17 -15 5830.00 274.144   2
 -15  -6 -17 5897.60 237.998   1
 -17  15   6 5952.05 230.821   1
  -4 -17 -15 940.198 116.547   2
 -15  -4 -17 860.885 96.7724   1
 -17  15   4 803.014 92.2629   1
  -2 -17 -15 13139.9 411.084   2
 -15  -2 -17 13124.2 382.385   1
 -17  15   2 13095.6 368.652   1
 -17  15   0 13294.1 378.459   1
   0 -17 -15 13479.9 413.370   2
 -15   0 -17 12991.8 386.297   1
   2 -17 -15 13600.4 413.961   2
 -17  15  -2 12257.1 375.373   1
 -15   2 -17 13558.6 401.823   1
  -2  17 -15 13441.1 421.544   1
   4 -17 -15 996.210 117.003   2
 -17  15  -4 1090.28 116.178   1
  -4  17 -15 1219.73 130.485   1
 -15   4 -17 1274.42 127.765   1
   6 -17 -15 6067.92 277.933   2
 -17  15  -6 6328.09 270.915   1
  -6  17 -15 5975.50 276.568   1
 -15   6 -17 6617.13 285.630   1
 -15   8 -17 19663.8 538.290   1
 -17  15  -8 19180.0 516.651   1
  -8  17 -15 19581.5 531.126   1
 -15  10 -17 3205.56 212.153   1
 -10  17 -15 3552.12 217.874   1
 -17  15 -10 2882.98 196.586   1
 -15  12 -17 13782.5 457.540   1
 -12  17 -15 14121.5 454.580   1
 -17  15 -12 13646.1 449.075   1
 -15  14 -17 3701.29 237.872   1
 -14  17 -15 3484.20 225.806   1
 -17  15 -14 3608.41 230.891   1
 -13 -17 -16 486.667 97.3370   2
 -11 -17 -16 190.541 80.4738   2
 -16  -9 -17 702.622 87.2923   1
  -9 -17 -16 704.586 112.757   2
 -16  -7 -17 6289.15 249.038   1
  -7 -17 -16 5766.00 281.215   2
 -17  16   7 6141.01 232.476   1
  -5 -17 -16 231.456 74.9514   2
 -16  -5 -17 159.757 57.5981   1
 -17  16   5 165.760 51.7336   1
  -3 -17 -16 2802.16 188.295   2
 -16  -3 -17 2988.08 177.871   1
 -17  16   3 2429.11 150.491   1
 -17  16   1 13.8077 46.4130   1
  -1 -17 -16 0.27828 64.4038   2
 -16  -1 -17 115.625 63.5161   1
 -17  16  -1 89.5085 53.9883   1
   1 -17 -16 24.3316 54.2889   2
 -16   1 -17 61.6543 63.4125   1
  -3  17 -16 2690.88 189.057   1
   3 -17 -16 2948.30 190.847   2
 -17  16  -3 2684.54 173.205   1
 -16   3 -17 2868.03 184.725   1
   5 -17 -16 191.578 75.6676   2
  -5  17 -16 260.576 79.2983   1
 -17  16  -5 341.494 76.8334   1
 -16   5 -17 211.443 75.6618   1
   7 -17 -16 6091.96 283.636   2
 -17  16  -7 6037.98 273.465   1
  -7  17 -16 5881.29 284.720   1
 -16   7 -17 6568.37 296.121   1
 -16   9 -17 796.866 113.987   1
 -17  16  -9 763.123 107.817   1
  -9  17 -16 634.130 100.827   1
 -16  11 -17 141.946 78.5521   1
 -11  17 -16 24.6235 53.3678   1
 -17  16 -11 92.1149 59.0875   1
 -16  13 -17 568.459 109.379   1
 -13  17 -16 419.690 89.8030   1
 -17  16 -13 405.246 94.3542   1
 -10 -17 -17 13143.8 453.304   2
  -8 -17 -17 93.5925 68.7851   2
 -17  -8 -17 71.4785 45.8831   1
 -17  -6 -17 797.114 97.2115   1
  -6 -17 -17 714.871 110.227   2
 -17  17   6 664.882 80.3732   1
  -4 -17 -17 10043.0 373.484   2
 -17  -4 -17 9917.01 340.508   1
 -17  17   4 10340.0 315.760   1
  -2 -17 -17 2137.11 169.856   2
 -17  -2 -17 2190.95 161.771   1
 -17  17   2 2337.41 149.790   1
 -17  17   0 11853.0 360.259   1
   0 -17 -17 12174.8 401.384   2
 -17   0 -17 11343.1 378.841   1
   2 -17 -17 2243.00 171.787   2
 -17  17  -2 2206.15 156.883   1
  -2  17 -17 2138.90 174.369   1
 -17   2 -17 2631.67 182.816   1
  -4  17 -17 10278.6 385.634   1
 -17  17  -4 10315.3 352.292   1
 -17   4 -17 10420.6 371.574   1
   4 -17 -17 10786.1 381.148   2
   6 -17 -17 829.448 115.576   2
 -17  17  -6 691.535 101.135   1
 -17   6 -17 748.814 113.956   1
  -6  17 -17 751.966 110.733   1
  -8  17 -17 48.1389 52.3466   1
 -17  17  -8 46.7552 62.3828   1
 -17   8 -17 174.932 68.9300   1
 -17  17 -10 13244.6 435.984   1
 -10  17 -17 13260.0 451.740   1
 -17  10 -17 14616.8 470.507   1
 -12  17 -17 4766.48 266.565   1
 -17  17 -12 4695.55 260.663   1
   0  18   0 41093.7 609.378   1
   0 -18   0 38805.0 679.568   2
   0   0 -18 41308.6 624.011   2
 -18   0   0 40431.7 742.049   1
   2 -18   0 5083.61 196.059   2
  -2 -18   0 5170.28 191.831   2
   0   2 -18 5441.75 148.267   2
   0  -2 -18 5119.99 177.029   2
 -18   0   2 5324.82 223.392   1
  -2  18   0 5361.01 155.527   1
 -18   0  -2 5176.12 218.634   1
   0   4 -18 165.418 24.6466   2
   0  -4 -18 134.608 39.1607   2
  -4 -18   0 102.936 39.4653   2
  -4  18   0 193.918 35.7946   1
 -18   0  -4 154.913 62.1910   1
 -18   0  -6 3415.37 182.690   1
   0  -6 -18 3602.44 144.380   1
   0  -6 -18 3321.26 160.687   2
  -6 -18   0 3396.20 158.703   2
   6  18   0 3393.94 131.107   1
  -6  18   0 3585.87 134.647   1
 -18   0  -8 5899.75 240.934   1
   0  -8 -18 6018.14 227.155   2
  -8 -18   0 5867.52 217.246   2
  -8  18   0 6059.38 189.833   1
   0  -8 -18 5856.48 173.604   1
   0 -10 -18 13068.7 368.859   2
 -18   0 -10 13345.0 386.526   1
 -10  18   0 12988.9 318.817   1
 -10 -18   0 12259.5 344.564   2
   0 -10 -18 13264.1 250.143   1
   0 -12 -18 7166.09 275.327   2
 -18   0 -12 7237.15 283.161   1
 -12  18   0 7453.80 244.082   1
 -12 -18   0 6819.54 254.890   2
   0 -14 -18 72.3683 59.6756   2
 -14  18   0 169.313 52.2785   1
 -18   0 -14 68.1699 54.1441   1
 -16  18   0 37.0696 45.6716   1
 -18   0 -16 104.800 64.4466   1
   0 -16 -18-7.96183 53.4752   2
 -17  18   1 363.233 74.3883   1
  -1 -17 -18 363.241 86.5257   2
 -18  -1 -17 297.604 75.9675   1
  -1 -15 -18 5306.80 252.327   2
 -18  -1 -15 5656.14 255.364   1
 -15  18   1 4909.62 209.730   1
 -13  18   1 6166.69 222.546   1
  -1 -13 -18 6461.52 268.983   2
 -18  -1 -13 6707.09 271.878   1
  -1 -11 -18 72.7832 49.0592   2
 -18  -1 -11 97.1022 54.7752   1
 -11  18   1 192.125 47.5278   1
 -11 -18  -1 122.519 48.1572   2
 -18  -1  -9 26916.2 582.776   1
  -1  -9 -18 26311.5 563.196   2
  -9  18   1 27348.4 489.340   1
  -9 -18  -1 26692.5 554.278   2
  -1  -9 -18 28297.8 445.730   1
  -7  18   1 745.373 62.6353   1
 -18  -1  -7 567.517 81.3262   1
  -1  -7 -18 589.982 75.0563   2
  -7 -18  -1 675.935 77.4220   2
  -1  -7 -18 713.946 63.4402   1
 -18  -1  -5 21693.8 495.916   1
  -1  -5 -18 21201.4 446.207   2
  -5 -18  -1 20874.9 452.460   2
  -1  -5 -18 21714.7 424.303   1
  -5  18   1 21841.5 379.638   1
   1   3 -18 5977.78 141.507   2
  -3  18   1 5617.22 154.265   1
  -3 -18  -1 5494.92 205.649   2
  -1  -3 -18 5616.02 193.087   2
  -1  -3 -18 5538.01 199.006   1
 -18   1   3 5518.40 227.943   1
 -18  -1  -3 5707.03 230.776   1
   1 -18   1 36892.1 641.888   2
   1   1 -18 37346.4 568.690   2
  -1 -18  -1 37433.8 656.512   2
  -1  -1 -18 38728.1 611.883   2
 -18   1   1 36824.0 703.521   1
 -18  -1  -1 37109.8 704.440   1
  -1  18   1 38360.9 556.284   1
   1 -18  -1 37341.4 657.436   2
  -1 -18   1 36353.9 632.509   2
   1  -1 -18 36948.8 596.356   2
  -1   1 -18 38918.5 583.270   2
   1  18   1 37805.4 558.529   1
 -18  -1   1 37201.1 704.032   1
  -1  18  -1 38398.1 590.736   1
 -18   1  -1 35842.7 695.485   1
 -18   1  -3 5715.98 233.922   1
   3 -18  -1 5417.24 207.504   2
   1  -3 -18 5698.39 190.147   2
  -3 -18   1 6010.86 203.045   2
  -1   3 -18 5797.99 151.767   2
 -18  -1   3 5782.25 235.837   1
  -3  18  -1 5834.03 174.800   1
 -18   1  -5 22180.1 506.971   1
  -1   5 -18 22548.1 329.174   2
   1  -5 -18 21097.3 444.246   2
  -5  18  -1 22043.5 407.062   1
  -5 -18   1 21262.5 441.603   2
   5  18   1 21613.5 381.228   1
  -7  18  -1 538.531 57.9344   1
 -18   1  -7 503.279 79.9647   1
   1  -7 -18 611.235 77.1591   2
  -7 -18   1 446.647 63.2828   2
   1  -7 -18 440.285 51.1279   1
   1  -9 -18 26944.4 559.877   2
 -18   1  -9 26769.5 588.388   1
  -9 -18   1 26227.7 530.565   2
  -9  18  -1 27387.1 503.431   1
   1  -9 -18 27509.0 448.368   1
   1 -11 -18 150.850 52.8802   2
 -18   1 -11 206.027 58.4373   1
 -11  18  -1 49.2983 38.4719   1
 -11 -18   1 104.094 46.5297   2
   1 -13 -18 6181.33 261.511   2
 -13  18  -1 6906.60 245.222   1
 -18   1 -13 6696.43 278.748   1
 -13 -18   1 6135.21 242.096   2
 -15  18  -1 4999.09 218.477   1
   1 -15 -18 5076.68 248.042   2
 -18   1 -15 4998.19 246.302   1
   1 -17 -18 691.699 110.501   2
 -17  18  -1 484.666 83.4554   1
 -18   1 -17 300.224 78.6397   1
 -16  18   2 1535.42 119.496   1
  -2 -16 -18 1665.55 149.416   2
 -18  -2 -16 1528.93 139.363   1
 -14  18   2 1818.92 120.076   1
  -2 -14 -18 1885.55 153.231   2
 -18  -2 -14 1788.77 144.397   1
 -12  18   2 120.444 41.4445   1
 -18  -2 -12 53.6794 47.1771   1
  -2 -12 -18 101.964 51.2259   2
 -12 -18  -2 172.829 54.8969   2
  -2 -10 -18 14875.2 271.610   1
 -18  -2 -10 13740.9 391.915   1
 -10  18   2 14141.2 321.387   1
  -2 -10 -18 14551.1 394.691   2
 -10 -18  -2 14420.5 386.128   2
 -18  -2  -8 2830.21 166.454   1
  -2  -8 -18 2746.13 155.519   2
  -8  18   2 3098.75 125.116   1
  -8 -18  -2 2733.46 154.098   2
  -2  -8 -18 3069.61 119.208   1
 -18  -2  -6 8388.38 287.804   1
  -2  -6 -18 8186.71 262.330   2
  -6 -18  -2 8453.52 270.131   2
  -2  -6 -18 8472.18 229.708   1
  -6  18   2 8685.27 204.241   1
  -2  -4 -18 1482.41 98.2826   1
  -4 -18  -2 1573.93 112.183   2
  -2  -4 -18 1460.50 102.213   2
 -18   2   4 1354.92 113.643   1
  -4  18   2 1356.26 69.8491   1
 -18  -2  -4 1291.39 114.021   1
   2 -18   2 18575.7 403.559   2
   2   2 -18 20257.0 335.097   2
  -2  18   2 20650.9 324.441   1
  -2 -18  -2 19153.5 427.195   2
  -2  -2 -18 19034.2 418.523   1
  -2  -2 -18 19393.9 398.370   2
 -18   2   2 18977.8 458.069   1
 -18  -2  -2 18764.8 457.436   1
   0 -18   2 1595.54 101.866   2
   2   0 -18 1679.97 87.5134   2
   0 -18  -2 1663.15 115.358   2
  -2   0 -18 1605.60 91.9354   2
  -2   0 -18 1591.86 114.429   1
 -18  -2   0 1600.72 123.322   1
   0  18  -2 1599.97 94.3524   1
   0  18   2 1714.84 70.2892   1
 -18   2   0 1514.06 120.727   1
   2 -18  -2 19787.3 435.909   2
   2  -2 -18 18691.4 376.333   2
  -2 -18   2 19163.1 397.279   2
  -2   2 -18 19230.2 354.119   2
  -2  18  -2 19354.0 378.604   1
 -18  -2   2 19576.4 465.542   1
   2  18   2 20202.6 326.602   1
 -18   2  -2 18946.9 459.077   1
   4 -18  -2 1364.85 106.651   2
 -18   2  -4 1528.32 125.320   1
  -4 -18   2 1334.05 92.9404   2
  -2   4 -18 1218.70 65.1244   2
  -4  18  -2 1419.99 89.0294   1
   4  18   2 1300.77 67.6329   1
   2  -4 -18 1320.72 93.8308   2
 -18   2  -6 8000.66 284.922   1
   2  -6 -18 7924.16 250.063   2
  -6  18  -2 8447.09 234.497   1
  -2   6 -18 8484.19 158.793   2
  -6 -18   2 8242.64 243.361   2
   6  18   2 8162.68 196.873   1
 -18   2  -8 3287.38 183.927   1
   2  -8 -18 3173.55 161.557   2
  -8 -18   2 2957.14 147.359   2
  -8  18  -2 3206.66 145.035   1
   2 -10 -18 14604.4 392.124   2
 -18   2 -10 14699.5 418.930   1
 -10 -18   2 14699.4 363.947   2
 -10  18  -2 14657.1 355.207   1
   2 -10 -18 15705.4 285.179   1
 -18   2 -12 123.814 59.6325   1
 -12 -18   2 170.835 50.7596   2
 -12  18  -2 85.5903 45.5751   1
   2 -12 -18 33.2088 47.0319   2
   2 -14 -18 1825.80 145.994   2
 -14  18  -2 1869.23 131.465   1
 -18   2 -14 1659.00 143.698   1
   2 -16 -18 1333.72 134.071   2
 -16  18  -2 1337.40 120.985   1
 -18   2 -16 1590.63 146.681   1
  -2  16 -18 1410.64 147.735   1
  -3 -17 -18-32.6744 68.9462   2
 -18  -3 -17 3.75496 59.9326   1
 -17  18   3-37.7546 46.1619   1
 -15  18   3 873.101 85.7840   1
  -3 -15 -18 1015.01 117.026   2
 -18  -3 -15 751.745 101.862   1
 -13  18   3 1422.53 101.087   1
  -3 -13 -18 1314.99 124.257   2
 -18  -3 -13 1537.77 132.512   1
 -18  -3 -11 273.416 67.6435   1
  -3 -11 -18 75.5907 57.5360   2
 -11 -18  -3 132.324 50.2596   2
 -11  18   3 154.758 41.1057   1
 -18  -3  -9 3851.37 194.544   1
  -9  18   3 4119.30 145.778   1
  -3  -9 -18 4286.76 136.909   1
  -3  -9 -18 3790.67 190.773   2
  -9 -18  -3 3850.05 190.643   2
 -18  -3  -7 20072.4 478.714   1
  -7  18   3 21349.5 365.282   1
  -3  -7 -18 20081.4 460.818   2
  -7 -18  -3 20079.0 465.041   2
  -3  -7 -18 20431.7 390.870   1
  -3  -5 -18 8321.40 234.518   1
  -5 -18  -3 7671.87 261.965   2
  -5  18   3 8306.96 182.456   1
  -3  -5 -18 8056.55 255.177   2
 -18   3   5 8408.20 287.819   1
 -18  -3  -5 8091.03 279.721   1
  -3 -18  -3 5564.65 215.662   2
  -3  -3 -18 5478.01 196.971   2
  -3  18   3 5953.97 134.665   1
 -18   3   3 6071.40 237.343   1
 -18  -3  -3 6072.78 237.224   1
  -3  -3 -18 5661.95 200.494   1
   1 -18   3 10617.5 274.517   2
   3   1 -18 10976.2 232.599   2
  -1 -18  -3 10174.6 297.925   2
  -3  -1 -18 11042.8 273.936   2
  -3  -1 -18 10562.1 298.003   1
 -18  -3  -1 10583.6 324.631   1
 -18   3   1 10149.9 319.412   1
  -1  18   3 10594.9 188.521   1
  -3   1 -18 11341.2 321.200   1
  -1 -18   3 11412.2 280.124   2
   1 -18  -3 11077.3 313.774   2
  -3   1 -18 10864.5 261.629   2
   1  18   3 11468.5 199.707   1
 -18  -3   1 11430.7 338.401   1
   3  -1 -18 11231.2 261.779   2
  -1  18  -3 11201.2 279.555   1
   1  18   3 11765.9 199.362   1
 -18   3  -1 11659.6 340.779   1
 -18   3  -3 5639.27 235.103   1
   3 -18  -3 5347.18 213.909   2
   3  -3 -18 5831.82 191.460   2
  -3 -18   3 5691.00 188.426   2
  -3  18  -3 5699.29 189.161   1
  -3   3 -18 5791.21 228.802   1
  -3   3 -18 6034.14 168.923   2
   3  18   3 6299.76 137.377   1
   5 -18  -3 8387.25 274.886   2
  -3   5 -18 8217.41 286.161   1
   3  -5 -18 8538.92 249.724   2
  -5 -18   3 8299.95 236.991   2
  -3   5 -18 8333.55 185.125   2
  -5  18  -3 8010.77 232.889   1
 -18   3  -5 7895.34 283.907   1
   5  18   3 8235.79 179.645   1
  -3   7 -18 20085.9 500.206   1
   3  -7 -18 21092.2 456.447   2
  -7  18  -3 21253.8 432.260   1
 -18   3  -7 20274.2 495.984   1
  -7 -18   3 20428.4 423.003   2
  -3   7 -18 21605.2 315.480   2
   3  -9 -18 3672.41 182.428   2
 -18   3  -9 3840.19 201.835   1
  -9 -18   3 3853.29 163.729   2
  -3   9 -18 3978.44 210.389   1
  -9  18  -3 3748.19 165.568   1
   3 -11 -18 233.780 60.4052   2
 -18   3 -11 353.157 79.1475   1
 -11 -18   3 135.717 39.3272   2
  -3  11 -18 182.780 55.7689   1
 -11  18  -3 118.905 42.4737   1
   3 -13 -18 1474.77 129.467   2
  -3  13 -18 1159.13 124.478   1
 -18   3 -13 1399.30 133.380   1
 -13  18  -3 1363.45 112.669   1
 -13 -18   3 1540.84 115.533   2
   3 -15 -18 1041.79 115.860   2
  -3  15 -18 871.837 121.057   1
 -15  18  -3 1056.02 108.947   1
 -18   3 -15 765.356 106.100   1
 -17  18  -3 147.620 59.9742   1
   3 -17 -18 214.525 79.2225   2
 -18   3 -17 97.7816 66.7691   1
  -3  17 -18 88.7088 63.0037   1
 -18  -4 -16 1447.53 132.292   1
  -4 -16 -18 1376.53 139.536   2
 -16  18   4 1404.74 112.322   1
 -18  -4 -14 1862.67 144.349   1
  -4 -14 -18 2070.57 160.577   2
 -14  18   4 2019.98 122.631   1
 -18  -4 -12 2270.03 152.988   1
  -4 -12 -18 2021.66 151.539   2
 -12 -18  -4 2295.67 158.445   2
 -12  18   4 2354.75 120.116   1
 -10  18   4 47326.6 713.654   1
 -18  -4 -10 46183.3 838.421   1
  -4 -10 -18 46287.3 844.649   2
 -10 -18  -4 47484.0 847.873   2
  -4 -10 -18 48054.6 672.657   1
 -18  -4  -8 2983.35 168.687   1
  -4  -8 -18 2744.54 115.494   1
  -4  -8 -18 2576.64 156.286   2
  -8 -18  -4 2724.32 160.173   2
  -8  18   4 2778.97 108.371   1
  -6  18   4 10800.2 211.389   1
  -6 -18  -4 9831.93 307.375   2
  -4  -6 -18 9776.88 297.648   2
  -4  -6 -18 10408.5 260.830   1
 -18  -4  -6 10306.2 318.951   1
  -4  18   4 278.627 26.9178   1
  -4 -18  -4 238.803 53.8348   2
  -4  -4 -18 258.209 50.4149   1
  -4  -4 -18 260.131 53.9573   2
 -18   4   4 157.068 49.4848   1
 -18  -4  -4 271.202 66.2737   1
  -2 -18  -4 14811.6 378.013   2
  -2  18   4 15163.5 221.877   1
  -4  -2 -18 14841.2 348.100   2
  -4  -2 -18 14402.3 353.338   1
 -18  -4  -2 14842.2 391.723   1
 -18   4   2 15747.7 403.789   1
  -4   0 -18 4478.18 191.250   1
   0 -18  -4 4478.03 193.203   2
  -4   0 -18 4390.28 163.661   2
   0  18   4 4198.14 81.0145   1
 -18  -4   0 4403.17 203.949   1
   0 -18   4 4655.77 165.697   2
   0  18   4 4769.21 84.5368   1
 -18   4   0 4736.14 209.884   1
   2  18   4 15102.6 222.374   1
 -18   4  -2 15780.3 408.947   1
   4  -2 -18 15427.4 328.476   2
  -2 -18   4 15747.3 330.564   2
   2 -18  -4 16230.0 394.929   2
  -2  18  -4 15740.1 354.014   1
  -4   2 -18 15403.1 391.853   1
  -4   2 -18 15509.9 320.944   2
   2  18   4 15261.7 221.296   1
   4  18   4 156.963 20.5184   1
   4  -4 -18 147.378 42.9935   2
  -4   4 -18 180.862 56.3351   1
  -4 -18   4 114.305 34.3803   2
 -18   4  -4 147.533 60.3552   1
  -4  18  -4 125.952 40.0338   1
  -4   4 -18 169.991 32.2262   2
   4 -18  -4 218.389 55.4668   2
  -4   6 -18 9741.51 321.866   1
 -18   4  -6 10096.9 327.685   1
  -6 -18   4 10083.9 258.879   2
  -4   6 -18 10286.0 212.959   2
  -6  18  -4 10103.3 278.734   1
   4  -6 -18 10235.0 286.196   2
   4  -8 -18 2492.22 146.390   2
  -8  18  -4 2594.78 138.764   1
  -4   8 -18 2376.27 162.164   1
 -18   4  -8 2797.72 174.668   1
  -4   8 -18 2798.13 83.9548   2
  -8 -18   4 2744.81 132.133   2
   4 -10 -18 45643.8 812.952   2
  -4  10 -18 46391.3 873.243   1
 -18   4 -10 47114.8 863.193   1
 -10 -18   4 46626.4 753.651   2
 -10  18  -4 44965.9 775.527   1
 -18   4 -12 2595.28 173.933   1
 -12 -18   4 2794.71 146.609   2
 -12  18  -4 2866.56 161.009   1
   4 -12 -18 2666.67 170.037   2
  -4  12 -18 2562.55 179.507   1
   4 -14 -18 1799.41 147.948   2
 -14  18  -4 1768.56 132.511   1
 -18   4 -14 1841.52 152.694   1
  -4  14 -18 1705.20 152.411   1
   4 -16 -18 1453.59 141.668   2
 -16  18  -4 1485.36 131.527   1
  -4  16 -18 1528.28 154.641   1
 -18   4 -16 1312.51 139.060   1
 -18  -5 -17 12053.7 382.537   1
  -5 -17 -18 12362.6 426.641   2
 -18  -5 -15 4838.42 228.137   1
  -5 -15 -18 4695.16 247.239   2
 -15  18   5 4946.18 195.451   1
 -18  -5 -13 4044.81 206.363   1
  -5 -13 -18 4131.87 220.539   2
 -13 -18  -5 4165.78 221.812   2
 -13  18   5 4160.28 164.498   1
 -18  -5 -11 2458.87 156.406   1
  -5 -11 -18 2268.63 158.637   2
 -11 -18  -5 2161.16 152.199   2
 -11  18   5 2235.92 108.147   1
 -18  -5  -9 3134.03 173.480   1
  -5  -9 -18 3316.30 180.741   2
  -9 -18  -5 3427.30 185.995   2
  -5  -9 -18 3510.34 128.578   1
  -9  18   5 3422.03 121.291   1
 -18  -5  -7 649.532 87.3007   1
  -7 -18  -5 815.539 93.3501   2
  -5  -7 -18 647.026 83.3696   2
  -5  -7 -18 806.828 68.1806   1
  -7  18   5 914.492 53.5630   1
  -5 -18  -5 2899.55 162.589   2
  -5  -5 -18 3346.67 164.322   2
  -5  -5 -18 2958.85 136.943   1
 -18   5   5 3277.05 175.065   1
 -18  -5  -5 2887.16 163.070   1
  -5  18   5 3154.54 81.9791   1
  -5  -3 -18 12642.6 319.501   1
  -3 -18  -5 13193.9 359.568   2
  -5  -3 -18 12668.3 326.995   2
 -18  -5  -3 13272.2 366.432   1
 -18   5   3 12793.2 361.490   1
  -1 -18  -5 12340.6 346.875   2
  -5  -1 -18 13240.0 338.739   1
  -5  -1 -18 12754.1 314.598   2
 -18  -5  -1 12796.5 360.267   1
 -18   5   1 12989.9 364.041   1
 -18   5  -1 11449.3 345.146   1
   1 -18  -5 12165.6 338.662   2
  -1  18  -5 12048.9 311.522   1
  -5   1 -18 12093.1 290.281   2
  -5   1 -18 11805.1 333.091   1
  -1 -18   5 12147.7 278.686   2
   5  -3 -18 13002.7 308.186   2
   3 -18  -5 12888.8 357.850   2
 -18   5  -3 13221.2 373.377   1
  -5   3 -18 12946.3 362.506   1
  -3 -18   5 13454.9 290.778   2
  -3  18  -5 13240.7 329.501   1
  -5  18  -5 2630.30 139.320   1
   5 -18  -5 2740.09 157.894   2
 -18   5  -5 2704.46 164.657   1
  -5   5 -18 2643.35 160.796   1
   5  -5 -18 2542.96 134.619   2
  -5 -18   5 2908.34 124.734   2
  -7 -18   5 651.748 64.1580   2
 -18   5  -7 613.743 87.8135   1
  -5   7 -18 729.543 93.4751   1
   5  -7 -18 741.917 83.8688   2
  -7  18  -5 776.353 80.1990   1
   5  -9 -18 3236.82 171.117   2
 -18   5  -9 3672.92 199.599   1
  -5   9 -18 3376.53 197.425   1
  -9 -18   5 3397.09 144.107   2
  -9  18  -5 3428.07 167.076   1
   5 -11 -18 2094.65 147.633   2
  -5  11 -18 1840.57 148.836   1
 -18   5 -11 2242.69 160.498   1
 -11 -18   5 2084.57 119.237   2
 -11  18  -5 2080.35 136.388   1
   5 -13 -18 3979.03 210.502   2
  -5  13 -18 3716.96 219.613   1
 -18   5 -13 4335.09 227.640   1
 -13 -18   5 4065.09 176.532   2
 -13  18  -5 3553.97 186.431   1
  -5  15 -18 5468.92 273.826   1
 -15  18  -5 5256.24 241.134   1
 -18   5 -15 5089.05 256.770   1
   5 -15 -18 5278.59 256.704   2
   5 -17 -18 12491.7 422.410   2
 -17  18  -5 12007.1 391.850   1
 -18   5 -17 12767.3 427.214   1
  -5  17 -18 12955.1 443.744   1
 -18  -6 -16 4990.74 234.608   1
  -6 -16 -18 5224.38 266.077   2
 -18  -6 -14 5559.09 241.267   1
  -6 -14 -18 5371.43 260.842   2
 -18  -6 -12 2135.05 147.765   1
  -6 -12 -18 2389.11 165.714   2
 -12 -18  -6 2435.32 170.655   2
 -12  18   6 2295.60 112.718   1
  -6 -10 -18 8042.25 297.095   2
  -6 -10 -18 8107.10 204.750   1
 -10 -18  -6 8007.38 299.986   2
 -10  18   6 8606.31 206.191   1
 -18  -6 -10 8191.61 285.399   1
  -8 -18  -6 1579.41 127.907   2
  -6  -8 -18 1998.67 140.802   2
  -8  18   6 1899.98 77.8113   1
  -6  -8 -18 1883.62 99.7153   1
 -18  -6  -8 1855.20 134.284   1
  -6  -6 -18 4620.08 171.159   1
  -6 -18  -6 4664.97 212.968   2
  -6  -6 -18 4939.38 209.918   2
 -18   6   6 4888.13 215.230   1
 -18  -6  -6 5009.26 217.223   1
  -4 -18  -6 3131.93 170.694   2
  -6  -4 -18 3154.65 147.112   1
  -6  -4 -18 3243.56 161.701   2
 -18   6   4 3013.78 168.740   1
 -18  -6  -4 3224.02 172.760   1
  -2 -18  -6 10990.8 327.767   2
  -6  -2 -18 11012.9 301.851   2
 -18  -6  -2 10697.2 327.340   1
 -18   6   2 10921.2 330.363   1
  -6  -2 -18 11329.8 305.490   1
 -18   6   0 486.455 75.7854   1
   0 -18  -6 390.864 65.7194   2
  -6   0 -18 388.024 65.1617   1
 -18   6  -2 11107.5 337.967   1
   2 -18  -6 11048.1 327.482   2
  -6   2 -18 11319.3 329.909   1
  -2  18  -6 10531.1 301.684   1
  -2 -18   6 11301.3 257.924   2
   4 -18  -6 3004.92 167.331   2
 -18   6  -4 2959.61 172.278   1
  -4 -18   6 3007.13 121.579   2
  -4  18  -6 2994.94 152.441   1
  -6   4 -18 3004.98 170.004   1
   6 -18  -6 4763.63 217.483   2
   6  -6 -18 4933.99 195.537   2
  -6 -18   6 5142.26 164.589   2
 -18   6  -6 4628.72 219.481   1
  -6   6 -18 5098.75 230.297   1
  -6  18  -6 5063.05 202.069   1
   6  -8 -18 1784.31 126.792   2
 -18   6  -8 1935.37 146.406   1
  -8 -18   6 1821.69 99.4046   2
  -8  18  -6 1655.30 118.949   1
  -6   8 -18 1349.80 127.052   1
   6 -10 -18 8317.41 289.353   2
 -10  18  -6 8616.86 283.269   1
 -10 -18   6 8384.63 235.016   2
 -18   6 -10 8422.53 313.024   1
  -6  10 -18 7677.61 305.224   1
   6 -12 -18 2376.83 159.996   2
 -12 -18   6 2229.27 122.211   2
 -18   6 -12 2291.42 169.464   1
  -6  12 -18 2462.17 177.788   1
 -12  18  -6 2159.98 146.168   1
 -14 -18   6 5463.78 206.686   2
 -18   6 -14 5861.24 271.845   1
   6 -14 -18 5636.19 260.593   2
 -14  18  -6 5199.45 236.979   1
  -6  14 -18 5245.81 265.868   1
   6 -16 -18 4718.23 251.925   2
 -16  18  -6 4902.96 240.396   1
  -6  16 -18 4756.81 262.988   1
 -18   6 -16 5260.83 266.830   1
 -18  -7 -17 7192.67 283.413   1
  -7 -17 -18 7041.42 322.385   2
  -7 -15 -18 1438.92 144.628   2
 -18  -7 -15 1216.99 118.875   1
 -18  -7 -13 450.333 76.6159   1
  -7 -13 -18 484.953 93.1824   2
 -13 -18  -7 497.680 89.1324   2
  -7 -11 -18 3793.02 205.648   2
 -11 -18  -7 3973.70 212.470   2
 -18  -7 -11 3665.37 187.694   1
  -9 -18  -7 22287.1 536.672   2
  -7  -9 -18 21904.8 523.567   2
  -7  -9 -18 23413.6 418.844   1
 -18  -7  -9 21677.8 502.958   1
  -7 -18  -7 10504.6 339.280   2
  -7  -7 -18 10445.7 328.896   2
 -18  -7  -7 10894.2 330.510   1
  -7  -7 -18 10771.1 270.273   1
  -7  -5 -18 527.734 65.0525   1
  -5 -18  -7 631.410 84.8392   2
  -7  -5 -18 428.730 68.9598   2
 -18   7   5 519.233 78.0999   1
 -18  -7  -5 588.453 84.3995   1
  -3 -18  -7 4077.22 198.603   2
  -7  -3 -18 3895.43 169.861   1
 -18  -7  -3 4220.89 197.669   1
 -18   7   3 4255.28 198.046   1
  -1 -18  -7 30509.0 615.570   2
  -7  -1 -18 30120.1 584.032   1
 -18   7   1 30910.1 620.870   1
 -18   7  -1 29517.5 610.614   1
   1 -18  -7 29370.6 601.474   2
  -7   1 -18 29500.6 588.189   1
   3 -18  -7 3971.79 194.091   2
 -18   7  -3 4096.75 200.387   1
  -7   3 -18 4094.86 195.332   1
  -3 -18   7 4093.26 135.797   2
  -3  18  -7 4195.57 184.784   1
   5 -18  -7 467.130 78.6146   2
  -5 -18   7 657.536 54.5618   2
 -18   7  -5 481.554 78.3963   1
  -5  18  -7 760.575 83.2845   1
  -7   5 -18 654.165 87.5687   1
  -7 -18   7 11556.1 254.074   2
 -18   7  -7 10904.1 356.035   1
  -7   7 -18 10933.9 354.348   1
  -7  18  -7 11373.4 326.412   1
   7  -9 -18 21620.0 503.789   2
  -9  18  -7 21670.3 497.592   1
  -9 -18   7 23482.0 417.484   2
 -18   7  -9 23330.4 554.826   1
  -7   9 -18 22976.6 556.334   1
   7 -11 -18 3918.87 201.627   2
 -11 -18   7 3969.85 153.661   2
  -7  11 -18 4084.69 223.671   1
 -18   7 -11 4036.05 218.629   1
 -11  18  -7 3864.17 194.506   1
   7 -13 -18 572.201 91.1896   2
 -13 -18   7 480.478 60.8036   2
 -18   7 -13 515.189 90.4734   1
  -7  13 -18 542.022 93.0600   1
 -13  18  -7 428.887 75.1695   1
   7 -15 -18 1474.86 140.444   2
  -7  15 -18 1637.33 158.755   1
 -18   7 -15 1487.93 149.600   1
 -15  18  -7 1468.81 133.322   1
   7 -17 -18 7182.14 317.916   2
  -7  17 -18 7105.58 323.304   1
 -17  18  -7 7368.57 309.751   1
 -18   7 -17 7411.77 325.740   1
 -18  -8 -16 7193.13 279.733   1
  -8 -16 -18 7530.64 326.391   2
  -8 -14 -18 4965.80 256.423   2
 -14 -18  -8 4862.97 257.809   2
 -18  -8 -14 4965.54 224.696   1
  -8 -12 -18 5400.10 256.955   2
 -12 -18  -8 5321.45 257.715   2
 -18  -8 -12 4893.46 219.778   1
  -8 -10 -18 1355.96 84.6335   1
 -10 -18  -8 1361.86 128.041   2
  -8 -10 -18 1339.15 126.294   2
 -18  -8 -10 1345.81 116.731   1
  -8 -18  -8 4309.73 216.741   2
  -8  -8 -18 3859.73 201.777   2
  -8  -8 -18 4068.69 158.130   1
 -18  -8  -8 4110.84 196.795   1
  -6 -18  -8 4203.32 207.490   2
  -8  -6 -18 3687.09 190.301   2
 -18   8   6 4123.08 195.732   1
 -18  -8  -6 4218.56 197.183   1
  -8  -6 -18 4144.89 166.350   1
  -8  -4 -18 13699.3 336.514   1
  -4 -18  -8 13539.4 386.681   2
 -18  -8  -4 13340.6 369.195   1
 -18   8   4 13398.0 371.746   1
  -2 -18  -8 15856.1 419.929   2
  -8  -2 -18 16079.1 384.880   1
 -18   8   2 16265.0 416.881   1
 -18   8   0 129.833 55.1454   1
   0 -18  -8 122.463 45.1071   2
  -8   0 -18 149.877 53.8323   1
 -18   8  -2 16986.7 435.089   1
   2 -18  -8 16894.8 432.451   2
  -2  18  -8 16621.3 410.766   1
  -8   2 -18 16210.8 417.309   1
  -8   4 -18 13888.2 391.651   1
   4 -18  -8 13918.4 395.691   2
 -18   8  -4 14486.0 403.092   1
  -4 -18   8 14672.7 277.872   2
  -4  18  -8 14198.4 373.564   1
  -6  18  -8 4184.89 195.982   1
  -8   6 -18 4308.19 212.420   1
  -6 -18   8 4223.81 132.198   2
 -18   8  -6 4452.60 219.409   1
   6 -18  -8 4637.68 219.714   2
  -8   8 -18 3683.81 206.200   1
  -8 -18   8 3969.73 132.686   2
 -18   8  -8 3960.69 211.234   1
  -8  18  -8 3701.91 186.525   1
  -8  10 -18 1667.01 143.790   1
 -10  18  -8 1693.06 131.162   1
 -10 -18   8 1596.72 88.4014   2
 -18   8 -10 1704.49 144.330   1
 -12  18  -8 5328.74 237.550   1
 -18   8 -12 6223.33 276.747   1
  -8  12 -18 5647.16 269.374   1
  -8  14 -18 5420.34 270.973   1
 -18   8 -14 4779.02 252.700   1
 -14  18  -8 4641.57 229.388   1
  -8  16 -18 6968.55 316.808   1
 -16  18  -8 6653.90 290.994   1
 -18   8 -16 7394.12 322.723   1
  -9 -17 -18 8541.10 358.779   2
 -18  -9 -17 7814.10 288.610   1
  -9 -15 -18 10619.5 390.608   2
 -18  -9 -15 9977.16 326.653   1
  -9 -13 -18 3381.84 210.537   2
 -13 -18  -9 3825.53 225.898   2
 -18  -9 -13 3341.23 179.965   1
 -11 -18  -9 112.862 61.4417   2
  -9 -11 -18-62.3906 65.9258   2
 -18  -9 -11 16.2060 47.8145   1
  -9  -9 -18 10257.2 261.986   1
  -9 -18  -9 9889.43 346.190   2
  -9  -9 -18 9620.36 338.300   2
 -18  -9  -9 9685.68 310.429   1
  -7 -18  -9 18791.8 484.092   2
  -9  -7 -18 18450.2 394.518   1
 -18  -9  -7 18052.0 442.264   1
  -9  -5 -18 606.502 68.4818   1
  -5 -18  -9 699.483 91.8579   2
 -18  -9  -5 537.582 79.3197   1
 -18   9   5 610.970 82.3775   1
  -9  -3 -18 1472.15 109.610   1
  -3 -18  -9 1390.72 121.963   2
 -18   9   3 1478.97 120.201   1
  -1 -18  -9 23142.6 528.412   2
  -9  -1 -18 22271.4 486.138   1
 -18   9   1 22300.7 510.103   1
   1 -18  -9 24860.2 556.182   2
  -9   1 -18 24666.0 532.062   1
 -18   9  -1 24063.4 540.973   1
   3 -18  -9 1576.06 127.603   2
 -18   9  -3 1522.76 126.762   1
  -3  18  -9 1471.08 117.971   1
  -9   3 -18 1467.59 120.352   1
   5 -18  -9 553.151 86.3040   2
 -18   9  -5 551.508 90.7771   1
  -9   5 -18 568.666 81.7784   1
  -5  18  -9 620.492 83.9128   1
 -18   9  -7 17681.3 470.427   1
  -9   7 -18 17680.1 469.047   1
  -7  18  -9 17438.7 439.576   1
 -18   9  -9 9690.57 342.699   1
  -9  18  -9 8919.85 305.647   1
  -9   9 -18 9217.07 335.885   1
  -9  11 -18 59.6817 49.3832   1
 -11  18  -9 73.8253 51.1386   1
 -18   9 -11 154.841 66.6383   1
 -18   9 -13 3428.18 210.073   1
  -9  13 -18 3540.43 218.215   1
 -13  18  -9 3102.94 189.181   1
 -18   9 -15 9843.80 375.857   1
 -15  18  -9 9805.53 354.069   1
  -9  15 -18 10112.9 380.517   1
 -17  18  -9 8034.58 332.076   1
 -18   9 -17 7472.76 334.881   1
  -9  17 -18 7759.51 344.632   1
 -10 -16 -18 6167.96 306.896   2
 -18 -10 -16 6417.55 254.946   1
 -10 -14 -18 78.2901 69.0007   2
 -14 -18 -10 40.3865 56.8786   2
 -18 -10 -14 110.743 53.8245   1
 -10 -12 -18 6436.25 289.772   2
 -12 -18 -10 7071.84 305.061   2
 -18 -10 -12 7037.69 260.967   1
 -10 -10 -18 2447.56 120.807   1
 -10 -18 -10 2064.05 162.275   2
 -10 -10 -18 2109.16 160.990   2
 -18 -10 -10 2088.70 141.503   1
  -8 -18 -10 4347.10 224.300   2
 -10  -8 -18 4593.32 178.317   1
 -18 -10  -8 4141.85 195.755   1
  -6 -18 -10 2579.99 169.527   2
 -18 -10  -6 2508.57 153.902   1
 -18  10   6 2497.10 153.596   1
 -10  -6 -18 2478.65 134.950   1
  -4 -18 -10 15600.5 432.539   2
 -18  10   4 15679.3 409.224   1
 -10  -4 -18 15676.8 379.011   1
 -10  -2 -18 1241.44 103.831   1
  -2 -18 -10 1572.68 130.615   2
 -18  10   2 1288.91 114.890   1
 -18  10   0 11116.4 337.782   1
 -10   0 -18 10342.8 317.018   1
   0 -18 -10 10735.4 344.931   2
  -2  18 -10 1525.12 124.970   1
   2 -18 -10 1539.92 128.918   2
 -18  10  -2 1174.63 114.097   1
 -10   2 -18 1435.02 119.126   1
  -4  18 -10 14810.7 407.042   1
   4 -18 -10 16202.8 435.325   2
 -18  10  -4 15340.8 423.770   1
 -10   4 -18 15052.2 414.554   1
  -6  18 -10 2754.69 166.299   1
 -18  10  -6 2962.46 183.051   1
   6 -18 -10 2707.39 173.849   2
 -10   6 -18 2309.91 159.089   1
 -18  10  -8 4540.33 232.094   1
 -10   8 -18 4334.53 224.380   1
  -8  18 -10 4440.95 214.296   1
 -10  18 -10 2546.94 168.693   1
 -18  10 -10 2497.95 177.736   1
 -10  10 -18 2729.32 185.062   1
 -12  18 -10 7084.95 290.566   1
 -18  10 -12 8157.20 326.515   1
 -10  12 -18 7070.80 306.520   1
 -14  18 -10 38.9371 59.9870   1
 -18  10 -14 167.993 69.5955   1
 -10  14 -18 208.324 69.3096   1
 -10  16 -18 6738.30 316.083   1
 -16  18 -10 6267.96 288.539   1
 -18  10 -16 6367.89 304.284   1
 -11 -15 -18 1077.31 135.844   2
 -15 -18 -11 1080.77 135.852   2
 -11 -13 -18 2431.32 186.672   2
 -13 -18 -11 2236.01 181.264   2
 -18 -11 -13 2352.68 149.693   1
 -11 -18 -11 4964.07 255.285   2
 -11 -11 -18 4501.91 243.199   2
 -18 -11 -11 4848.70 211.148   1
 -11  -9 -18 4074.80 168.446   1
  -9 -18 -11 4213.14 230.026   2
 -18 -11  -9 3939.47 191.435   1
  -7 -18 -11 1295.53 128.855   2
 -11  -7 -18 1279.13 101.348   1
 -18  11   7 1468.92 116.949   1
  -5 -18 -11 6492.00 272.246   2
 -11  -5 -18 6151.69 224.498   1
 -18  11   5 6372.57 245.899   1
  -3 -18 -11 2257.04 160.805   2
 -18  11   3 2681.23 160.162   1
 -11  -3 -18 2317.24 141.752   1
 -18  11   1 1410.54 120.828   1
 -11  -1 -18 1418.98 116.388   1
  -1 -18 -11 1807.01 144.565   2
 -18  11  -1 1966.01 144.151   1
   1 -18 -11 1864.08 143.963   2
 -11   1 -18 1856.44 135.146   1
 -18  11  -3 3152.91 182.207   1
 -11   3 -18 2724.20 165.722   1
   3 -18 -11 2920.22 177.512   2
  -3  18 -11 2706.00 168.552   1
   5 -18 -11 6748.61 278.118   2
 -18  11  -5 6991.52 278.910   1
 -11   5 -18 6417.84 267.823   1
  -5  18 -11 6578.52 265.268   1
  -7  18 -11 1419.71 127.116   1
   7 -18 -11 1287.69 127.957   2
 -11   7 -18 1445.05 136.265   1
 -18  11  -7 1205.52 125.188   1
 -18  11  -9 3669.15 213.426   1
 -11   9 -18 4105.40 222.481   1
  -9  18 -11 3992.63 210.110   1
 -11  18 -11 5147.06 244.791   1
 -11  11 -18 5294.25 263.617   1
 -18  11 -11 5145.61 258.184   1
 -13  18 -11 1951.83 157.672   1
 -11  13 -18 2344.85 182.665   1
 -18  11 -13 1830.05 161.603   1
 -11  15 -18 1300.72 141.965   1
 -18  11 -15 1311.48 143.242   1
 -15  18 -11 1371.92 139.435   1
 -17  18 -11 999.385 129.717   1
 -12 -14 -18 303.195 76.1402   2
 -14 -18 -12 256.323 83.6649   2
 -12 -18 -12 2726.19 197.179   2
 -12 -12 -18 2336.50 182.357   2
 -18 -12 -12 2699.55 158.346   1
 -10 -18 -12 16709.5 488.896   2
 -18 -12 -10 15805.7 406.318   1
 -12 -10 -18 15867.1 365.125   1
 -12  -8 -18 7688.90 251.804   1
  -8 -18 -12 7872.72 317.800   2
  -6 -18 -12 862.402 108.340   2
 -12  -6 -18 951.660 93.4771   1
 -18  12   6 872.342 94.0889   1
  -4 -18 -12 842.578 107.968   2
 -12  -4 -18 941.722 95.0824   1
 -18  12   4 910.317 96.3645   1
  -2 -18 -12 6838.83 280.276   2
 -12  -2 -18 6568.14 249.874   1
 -18  12   2 6392.13 250.866   1
 -12   0 -18 2137.18 146.193   1
 -18  12   0 2294.44 150.614   1
   0 -18 -12 2232.52 160.617   2
   2 -18 -12 6934.94 281.344   2
 -18  12  -2 6712.43 268.022   1
  -2  18 -12 6793.93 274.693   1
 -12   2 -18 7006.85 270.855   1
   4 -18 -12 956.192 108.762   2
  -4  18 -12 776.895 101.050   1
 -18  12  -4 898.055 104.835   1
 -12   4 -18 1070.05 115.352   1
 -18  12  -6 667.519 95.1341   1
 -12   6 -18 798.662 101.956   1
  -6  18 -12 471.566 78.7048   1
   6 -18 -12 778.203 104.452   2
 -12   8 -18 7425.12 303.068   1
 -18  12  -8 7994.73 313.202   1
  -8  18 -12 7432.73 293.658   1
 -12  10 -18 18435.0 512.691   1
 -10  18 -12 17517.9 483.622   1
 -18  12 -10 17976.9 503.710   1
 -12  18 -12 2458.55 176.172   1
 -12  12 -18 2603.08 191.558   1
 -18  12 -12 2725.83 195.965   1
 -14  18 -12 246.199 75.0865   1
 -12  14 -18 322.940 83.3017   1
 -18  12 -14 431.259 99.3751   1
 -16  18 -12 867.165 117.080   1
 -13 -15 -18 876.048 126.347   2
 -13 -18 -13 18036.8 539.062   2
 -13 -13 -18 17732.3 533.490   2
 -11 -18 -13 666.390 107.977   2
  -9 -18 -13 12827.1 423.632   2
 -13  -9 -18 12685.1 334.518   1
 -13  -7 -18 6499.04 238.499   1
  -7 -18 -13 6251.53 285.449   2
 -18  13   7 6097.50 242.176   1
  -5 -18 -13 11324.7 379.021   2
 -13  -5 -18 11161.5 327.497   1
 -18  13   5 10693.5 328.779   1
  -3 -18 -13 3070.24 191.627   2
 -13  -3 -18 2829.18 163.396   1
 -18  13   3 2647.90 161.581   1
 -18  13   1 83.0271 53.6479   1
  -1 -18 -13 52.8492 45.3956   2
 -13  -1 -18 123.356 47.9431   1
 -13   1 -18 61.7804 50.5198   1
 -18  13  -1 51.8045 47.1572   1
   1 -18 -13 88.0239 52.2088   2
   3 -18 -13 2905.37 184.925   2
 -18  13  -3 2655.28 170.696   1
 -13   3 -18 2951.00 179.795   1
  -3  18 -13 2724.83 180.791   1
   5 -18 -13 11077.5 372.448   2
 -13   5 -18 10594.8 361.020   1
 -18  13  -5 10758.0 359.755   1
  -5  18 -13 10604.8 361.391   1
   7 -18 -13 6622.61 289.597   2
  -7  18 -13 6414.64 278.238   1
 -13   7 -18 6547.94 285.121   1
 -18  13  -7 6799.56 289.131   1
 -13   9 -18 12435.2 412.447   1
 -18  13  -9 13059.5 417.602   1
  -9  18 -13 12524.1 403.966   1
 -13  11 -18 498.242 96.6790   1
 -11  18 -13 949.693 115.178   1
 -18  13 -11 889.539 121.388   1
 -13  18 -13 16447.0 490.704   1
 -13  13 -18 16245.9 501.134   1
 -18  13 -13 16289.6 498.850   1
 -15  18 -13 898.892 118.339   1
 -13  15 -18 836.008 119.627   1
 -14 -14 -18 434.441 93.0594   2
 -12 -18 -14 2011.68 177.347   2
 -10 -18 -14 1484.48 149.683   2
 -14  -8 -18 2585.34 150.197   1
  -8 -18 -14 2843.82 197.156   2
  -6 -18 -14 6312.13 287.321   2
 -14  -6 -18 6233.48 242.534   1
 -18  14   6 6089.33 241.484   1
  -4 -18 -14 3774.80 219.289   2
 -14  -4 -18 3930.66 194.181   1
 -18  14   4 3953.55 193.489   1
  -2 -18 -14 12845.0 407.713   2
 -14  -2 -18 12293.3 367.131   1
 -18  14   2 12293.5 363.277   1
 -18  14   0 1457.02 124.707   1
   0 -18 -14 1578.60 140.600   2
 -14   0 -18 1405.28 125.010   1
   2 -18 -14 12302.0 397.131   2
 -18  14  -2 12498.2 380.180   1
  -2  18 -14 12227.2 397.973   1
 -14   2 -18 12571.9 384.916   1
 -14   4 -18 4002.08 217.499   1
   4 -18 -14 3626.95 213.123   2
  -4  18 -14 3962.58 221.053   1
 -18  14  -4 3653.25 205.394   1
   6 -18 -14 6107.89 279.817   2
 -14   6 -18 6440.34 283.586   1
 -18  14  -6 6044.61 272.355   1
  -6  18 -14 5857.90 269.901   1
 -14   8 -18 2250.09 172.598   1
 -18  14  -8 2237.02 168.714   1
  -8  18 -14 2435.88 176.628   1
 -14  10 -18 1610.45 152.638   1
 -10  18 -14 1506.86 148.069   1
 -18  14 -10 1591.63 152.715   1
 -14  12 -18 1875.32 167.751   1
 -12  18 -14 1995.99 165.346   1
 -18  14 -12 2000.25 170.788   1
 -14  18 -14 672.842 108.441   1
 -14  14 -18 377.144 87.9769   1
 -18  14 -14 552.418 109.407   1
 -11 -18 -15 9019.74 370.763   2
  -9 -18 -15 7651.94 331.433   2
 -15  -9 -18 7300.01 258.790   1
 -15  -7 -18 11347.4 342.794   1
  -7 -18 -15 11849.6 412.266   2
 -18  15   7 11169.9 336.824   1
  -5 -18 -15 4470.88 241.021   2
 -15  -5 -18 4078.49 204.946   1
 -18  15   5 4516.72 206.664   1
  -3 -18 -15 2540.09 182.048   2
 -15  -3 -18 2614.87 167.311   1
 -18  15   3 2586.94 160.465   1
 -18  15   1 27176.2 596.741   1
  -1 -18 -15 29735.9 666.234   2
 -15  -1 -18 27632.9 610.940   1
 -18  15  -1 26286.8 595.419   1
   1 -18 -15 28885.6 650.310   2
 -15   1 -18 26628.2 609.512   1
   3 -18 -15 2601.47 182.862   2
 -18  15  -3 2316.70 164.252   1
 -15   3 -18 2579.40 175.490   1
  -3  18 -15 2218.42 169.322   1
   5 -18 -15 4112.01 231.134   2
 -18  15  -5 4063.53 221.260   1
  -5  18 -15 4219.89 234.269   1
 -15   5 -18 4070.63 225.704   1
 -15   7 -18 13306.7 431.367   1
   7 -18 -15 13588.7 437.183   2
 -18  15  -7 13071.7 418.520   1
  -7  18 -15 13238.0 428.992   1
 -18  15  -9 6194.24 287.421   1
 -15   9 -18 6067.80 293.912   1
  -9  18 -15 6289.50 293.205   1
 -15  11 -18 9215.53 371.990   1
 -11  18 -15 9370.77 364.622   1
 -18  15 -11 9831.62 374.085   1
 -13  18 -15 878.489 122.595   1
 -18  15 -13 1010.53 127.973   1
 -10 -18 -16 2766.16 204.389   2
 -16  -8 -18 4079.13 198.477   1
  -8 -18 -16 4058.65 241.967   2
 -16  -6 -18 14.3767 45.3323   1
  -6 -18 -16 172.232 71.1899   2
 -18  16   6 143.727 49.3817   1
  -4 -18 -16 3581.04 218.290   2
 -16  -4 -18 3059.65 183.310   1
 -18  16   4 3412.68 181.037   1
  -2 -18 -16 3079.26 200.835   2
 -16  -2 -18 3221.43 191.723   1
 -18  16   2 3165.98 177.710   1
 -18  16   0 5879.86 250.861   1
   0 -18 -16 6151.12 280.297   2
 -16   0 -18 5545.18 256.269   1
   2 -18 -16 2698.46 190.225   2
 -18  16  -2 2792.29 176.942   1
 -16   2 -18 2878.30 188.040   1
  -2  18 -16 2939.06 199.416   1
   4 -18 -16 3859.93 228.099   2
  -4  18 -16 3750.95 227.263   1
 -18  16  -4 3624.46 209.479   1
 -16   4 -18 4010.01 227.871   1
 -16   6 -18-18.0572 69.3208   1
   6 -18 -16 16.5183 61.9600   2
 -18  16  -6 71.7765 61.4530   1
  -6  18 -16-35.4175 68.6552   1
  -8  18 -16 3897.57 232.133   1
 -18  16  -8 3743.41 226.463   1
 -16   8 -18 4004.74 235.291   1
 -18  16 -10 2925.48 205.856   1
 -10  18 -16 3011.62 208.040   1
 -16  10 -18 3211.53 215.529   1
 -12  18 -16 4136.80 245.365   1
 -18  16 -12 4239.77 251.910   1
  -9 -18 -17 1732.76 165.143   2
 -17  -7 -18 4828.94 226.535   1
  -7 -18 -17 5000.15 267.984   2
  -5 -18 -17 552.103 101.355   2
 -17  -5 -18 404.680 76.0972   1
 -18  17   5 599.320 82.2706   1
  -3 -18 -17 699.612 105.723   2
 -17  -3 -18 925.694 107.806   1
 -18  17   3 854.340 96.4677   1
 -18  17   1 2778.53 170.824   1
  -1 -18 -17 2836.63 196.142   2
 -17  -1 -18 2627.01 180.353   1
 -18  17  -1 2865.67 177.852   1
   1 -18 -17 3082.63 203.400   2
 -17   1 -18 3038.40 197.067   1
  -1  18 -17 2530.21 190.336   1
  -3  18 -17 1048.57 130.375   1
   3 -18 -17 849.101 119.017   2
 -18  17  -3 795.103 101.589   1
 -17   3 -18 877.695 118.893   1
  -5  18 -17 289.910 77.1396   1
   5 -18 -17 281.420 80.3063   2
 -18  17  -5 256.638 75.8956   1
 -17   5 -18 229.893 77.6692   1
   7 -18 -17 5007.89 266.308   2
  -7  18 -17 5487.31 279.681   1
 -18  17  -7 4813.51 252.088   1
 -17   7 -18 4987.05 264.398   1
 -18  17  -9 1341.33 140.092   1
  -9  18 -17 1443.46 151.020   1
 -17   9 -18 1943.75 171.959   1
 -18  17 -11 1857.39 169.301   1
 -18  -8 -18 4574.01 224.055   1
  -8 -18 -18 4809.58 270.288   2
 -18  -6 -18-46.1567 54.8126   1
  -6 -18 -18 104.036 68.9284   2
  -4 -18 -18 13944.4 455.020   2
 -18  -4 -18 12406.1 399.424   1
 -18  18   4 13119.5 373.922   1
  -2 -18 -18 8611.91 352.777   2
 -18  -2 -18 8237.52 322.770   1
 -18  18   2 7927.34 289.529   1
 -18  18   0 15313.1 428.778   1
   0 -18 -18 15903.3 485.960   2
 -18   0 -18 15675.8 468.940   1
   2 -18 -18 9792.33 370.892   2
 -18  18  -2 8480.35 319.187   1
  -2  18 -18 8636.95 362.295   1
 -18   2 -18 8857.83 347.868   1
   4 -18 -18 13430.3 445.997   2
  -4  18 -18 12961.3 450.500   1
 -18  18  -4 12482.2 402.897   1
 -18   4 -18 12788.7 433.045   1
 -18  18  -6 66.1105 58.1680   1
 -18   6 -18-18.7836 65.8280   1
  -6  18 -18 61.1592 65.7818   1
   6 -18 -18-27.1018 75.5551   2
 -18  18  -8 4829.51 255.352   1
  -8  18 -18 4991.68 275.541   1
 -18   8 -18 4968.89 272.253   1
 -18  18 -10 4470.18 254.903   1
  -1 -19   0 11070.2 302.036   2
  -1  19   0 11283.6 247.283   1
   0   1 -19 11323.0 250.154   2
   0  -1 -19 11245.6 268.552   2
   1  19   0 10956.3 249.833   1
   1 -19   0 10889.9 303.035   2
 -19   0   1 11028.3 340.924   1
 -19   0  -1 11633.9 350.218   1
   3 -19   0 77919.5 1182.33   2
   0  -3 -19 80239.7 1146.29   2
   0   3 -19 83193.1 1042.91   2
  -3 -19   0 78557.5 1169.01   2
  -3  19   0 80504.6 1081.57   1
 -19   0   3 79319.2 1248.79   1
 -19   0  -3 81164.4 1249.50   1
 -19   0  -5 2980.44 173.192   1
   0   5 -19 2830.22 77.3225   2
   0  -5 -19 2800.08 143.569   2
  -5 -19   0 2736.24 145.144   2
   0  -5 -19 2642.20 132.448   1
  -5  19   0 2822.52 118.135   1
   0  -7 -19 644.884 62.9546   1
 -19   0  -7 580.494 87.7567   1
   0  -7 -19 533.153 73.5721   2
  -7 -19   0 631.018 75.0018   2
  -7  19   0 612.870 60.3957   1
 -19   0  -9 665.908 93.0021   1
   0  -9 -19 527.844 75.9357   2
   0  -9 -19 527.594 51.0025   1
  -9 -19   0 505.559 70.1870   2
  -9  19   0 643.995 66.5064   1
 -19   0 -11 2303.10 160.035   1
   0 -11 -19 2138.82 150.824   2
 -11  19   0 2088.21 123.196   1
 -11 -19   0 1809.19 130.237   2
   0 -13 -19 18600.8 490.797   2
 -13  19   0 18208.7 424.627   1
 -19   0 -13 19019.2 498.682   1
 -13 -19   0 17854.8 457.275   2
 -15  19   0 77.6948 44.6405   1
   0 -15 -19 17.1748 47.9811   2
 -19   0 -15 133.015 63.2729   1
   0 -17 -19 115.891 64.4443   2
 -17  19   0 95.1259 48.1110   1
 -19   0 -17 95.1757 65.1649   1
 -18  19   1 6154.65 256.271   1
  -1 -18 -19 6354.17 304.702   2
 -19  -1 -18 6105.35 284.223   1
 -16  19   1 13571.8 376.923   1
  -1 -16 -19 13538.4 436.441   2
 -19  -1 -16 13706.1 429.188   1
 -14  19   1 1054.01 97.7747   1
  -1 -14 -19 1038.40 115.439   2
 -19  -1 -14 821.621 105.230   1
 -14 -19  -1 942.673 105.842   2
 -12  19   1 2923.66 146.231   1
 -19  -1 -12 2952.03 183.188   1
  -1 -12 -19 2962.87 179.495   2
 -12 -19  -1 2695.21 162.425   2
 -19  -1 -10 7145.76 280.234   1
  -1 -10 -19 7077.95 270.325   2
 -10  19   1 7181.78 221.650   1
  -1 -10 -19 7262.13 175.398   1
 -10 -19  -1 6976.56 257.842   2
 -19  -1  -8 2035.94 149.341   1
  -1  -8 -19 2161.96 139.844   2
  -1  -8 -19 2257.07 106.660   1
  -8 -19  -1 2208.10 137.506   2
  -8  19   1 2105.17 107.875   1
  -1  -6 -19 805.296 72.3287   1
 -19  -1  -6 1036.94 109.806   1
  -1  -6 -19 865.808 86.5332   2
  -6 -19  -1 933.206 89.8607   2
  -6  19   1 939.677 66.8402   1
  -1  -4 -19 10895.4 294.352   1
   1   4 -19 11549.9 203.127   2
  -4 -19  -1 10758.2 306.496   2
  -1  -4 -19 11170.9 298.884   2
 -19   1   4 10826.9 342.324   1
 -19  -1  -4 10973.5 340.703   1
  -4  19   1 11204.9 241.712   1
   1   2 -19 1084.34 64.9726   2
   2 -19   1 1137.95 94.8464   2
  -2 -19  -1 1005.88 91.4115   2
  -1  -2 -19 1276.41 90.3497   2
  -2  19   1 1167.35 66.2346   1
 -19   1   2 1236.92 115.041   1
 -19  -1  -2 1117.07 109.459   1
   0 -19   1 7671.97 241.143   2
   0 -19  -1 7189.35 242.531   2
   1   0 -19 7563.12 203.625   2
   0  19   1 7655.42 183.311   1
   0  19  -1 7917.95 210.256   1
  -1   0 -19 7548.90 210.590   2
 -19  -1   0 7303.95 272.126   1
 -19   1   0 7898.47 281.750   1
  -2  19  -1 1443.90 85.3373   1
   2 -19  -1 1329.15 104.140   2
  -2 -19   1 1324.93 97.0280   2
   1  -2 -19 1543.65 95.0361   2
  -1   2 -19 1319.26 76.5232   2
   2  19   1 1410.48 74.5504   1
 -19  -1   2 1424.05 122.521   1
 -19   1  -2 1340.74 118.009   1
 -19   1  -4 9879.88 324.286   1
  -1   4 -19 10381.8 204.445   2
   1  -4 -19 9688.16 271.687   2
  -4 -19   1 10089.1 281.342   2
  -4  19  -1 10220.4 248.038   1
  -6  19  -1 848.447 70.8998   1
 -19   1  -6 966.144 105.986   1
  -1   6 -19 870.923 35.3588   2
   1  -6 -19 904.898 86.9129   2
  -6 -19   1 945.304 85.2345   2
 -19   1  -8 2111.43 149.198   1
   1  -8 -19 1897.82 128.872   2
  -8 -19   1 1820.20 120.461   2
   1  -8 -19 1706.45 96.2193   1
  -8  19  -1 1937.12 110.953   1
   1 -10 -19 6538.35 166.563   1
   1 -10 -19 6017.62 245.877   2
 -19   1 -10 6200.73 264.682   1
 -10 -19   1 5915.39 227.477   2
 -10  19  -1 6107.97 212.302   1
   1 -12 -19 2473.24 166.171   2
 -19   1 -12 2772.99 179.907   1
 -12  19  -1 2564.86 144.797   1
 -12 -19   1 2436.04 150.504   2
   1 -14 -19 916.303 109.790   2
 -14  19  -1 994.000 98.2524   1
 -19   1 -14 863.118 110.170   1
 -14 -19   1 911.338 98.4673   2
   1 -16 -19 13573.1 434.336   2
 -16  19  -1 13631.0 388.915   1
 -19   1 -16 13125.0 429.202   1
 -18  19  -1 5816.52 258.981   1
   1 -18 -19 6818.03 311.652   2
 -19   1 -18 6303.24 295.234   1
  -1  18 -19 6113.16 308.058   1
  -2 -17 -19 9382.97 362.682   2
 -19  -2 -17 8754.30 339.943   1
 -17  19   2 8796.73 299.113   1
 -15  19   2 5770.87 224.748   1
 -19  -2 -15 5596.38 261.134   1
  -2 -15 -19 5779.36 271.427   2
 -13  19   2 9378.25 273.208   1
 -19  -2 -13 9135.90 326.857   1
  -2 -13 -19 8913.39 327.274   2
 -13 -19  -2 8712.19 310.868   2
 -19  -2 -11 172.697 62.9132   1
 -11  19   2 241.996 48.4843   1
  -2 -11 -19 173.837 62.2006   2
 -11 -19  -2 229.676 62.1295   2
 -19  -2  -9 8570.09 307.076   1
  -9  19   2 9226.52 236.636   1
  -2  -9 -19 8796.21 296.641   2
  -2  -9 -19 9034.53 215.186   1
  -9 -19  -2 8348.25 286.111   2
 -19  -2  -7 4633.76 217.278   1
  -2  -7 -19 4528.72 160.199   1
  -2  -7 -19 4104.92 189.623   2
  -7 -19  -2 4305.25 193.855   2
  -7  19   2 4406.53 145.313   1
  -5 -19  -2 1885.40 125.920   2
  -2  -5 -19 1875.99 120.981   2
  -5  19   2 1844.23 84.5810   1
  -2  -5 -19 1770.78 108.494   1
 -19  -2  -5 1790.41 136.252   1
  -3 -19  -2 7632.05 254.596   2
  -2  -3 -19 7717.17 238.478   2
  -2  -3 -19 7654.88 244.329   1
 -19   2   3 7716.43 281.281   1
  -3  19   2 7860.72 176.994   1
 -19  -2  -3 7627.11 279.127   1
   1 -19   2 6927.27 224.956   2
   2   1 -19 6999.83 180.780   2
  -1 -19  -2 6852.10 238.659   2
  -1  19   2 6894.34 156.849   1
  -2  -1 -19 6946.91 210.427   2
  -2  -1 -19 6642.67 237.118   1
 -19  -2  -1 6709.27 260.724   1
 -19   2   1 6555.02 258.538   1
  -1 -19   2 6382.48 211.222   2
   1 -19  -2 6718.26 237.970   2
   2  -1 -19 6674.28 195.767   2
   1  19   2 6845.68 156.725   1
  -2   1 -19 6415.01 189.859   2
 -19  -2   1 6780.96 262.388   1
  -1  19  -2 6508.64 197.508   1
 -19   2  -1 6572.92 257.500   1
  -2   1 -19 6481.87 242.710   1
 -19   2  -3 8392.07 292.761   1
   3 -19  -2 7531.95 260.901   2
   2  -3 -19 7700.84 228.326   2
  -3 -19   2 8005.02 239.011   2
  -2   3 -19 7707.63 191.120   2
  -3  19  -2 8081.85 222.737   1
 -19   2  -5 1676.01 134.004   1
   2  -5 -19 1811.04 113.724   2
  -5 -19   2 1718.96 108.500   2
  -2   5 -19 1756.85 71.0393   2
  -5  19  -2 1766.42 102.401   1
  -7  19  -2 3635.87 153.855   1
   2  -7 -19 3498.47 169.241   2
 -19   2  -7 3352.98 188.737   1
  -7 -19   2 3497.64 161.226   2
   2  -9 -19 9089.54 298.402   2
 -19   2  -9 9194.60 323.601   1
  -9 -19   2 8954.60 275.691   2
   2  -9 -19 9512.92 229.772   1
  -9  19  -2 9293.10 267.010   1
   2 -11 -19 168.965 59.2071   2
 -19   2 -11 250.633 70.5829   1
 -11 -19   2 168.157 46.0131   2
 -11  19  -2 265.109 53.4751   1
   2 -13 -19 8678.24 319.343   2
 -19   2 -13 8803.43 332.766   1
 -13  19  -2 9209.07 293.411   1
 -13 -19   2 8971.30 293.843   2
  -2  13 -19 8609.19 342.875   1
   2 -15 -19 4609.48 240.598   2
 -15  19  -2 4603.80 216.783   1
 -19   2 -15 5243.41 262.126   1
 -15 -19   2 4696.10 220.359   2
  -2  15 -19 5291.40 272.646   1
   2 -17 -19 9050.12 356.189   2
 -17  19  -2 8951.02 318.654   1
 -19   2 -17 8925.46 354.043   1
  -2  17 -19 9258.64 378.613   1
  -3 -18 -19 7998.64 341.242   2
 -19  -3 -18 7199.57 306.700   1
 -19  -3 -16 31532.2 695.790   1
  -3 -16 -19 31599.0 726.231   2
 -16  19   3 33223.0 630.831   1
 -19  -3 -14 11948.3 385.533   1
  -3 -14 -19 12198.3 398.720   2
 -14 -19  -3 12050.4 388.318   2
 -14  19   3 13378.3 335.378   1
 -12  19   3 10609.9 277.007   1
 -19  -3 -12 10099.9 339.672   1
  -3 -12 -19 9724.50 338.166   2
 -12 -19  -3 9763.75 334.252   2
 -19  -3 -10 4438.27 219.418   1
 -10  19   3 4617.65 164.468   1
  -3 -10 -19 4580.95 215.439   2
 -10 -19  -3 4299.70 207.422   2
  -3 -10 -19 4577.77 138.256   1
 -19  -3  -8 48193.0 869.750   1
  -8  19   3 49650.5 714.878   1
  -3  -8 -19 48408.7 847.450   2
  -8 -19  -3 48331.0 849.745   2
  -3  -8 -19 48372.6 730.323   1
  -3  -6 -19 16830.1 356.524   1
  -6  19   3 16530.6 300.814   1
  -6 -19  -3 16368.7 412.380   2
  -3  -6 -19 16431.3 401.712   2
 -19  -3  -6 15729.1 425.261   1
  -4 -19  -3 202.323 53.9142   2
  -3  -4 -19 374.046 60.4134   2
  -4  19   3 260.301 30.5927   1
 -19   3   4 274.424 62.5413   1
 -19  -3  -4 306.396 73.4664   1
  -3  -4 -19 373.161 56.7565   1
  -3  -2 -19 2004.24 122.883   1
  -2 -19  -3 1956.39 129.539   2
  -3  -2 -19 2081.43 119.570   2
  -2  19   3 2127.43 71.5427   1
 -19   3   2 1795.75 136.830   1
 -19  -3  -2 2127.06 144.957   1
   0 -19   3 30959.3 553.728   2
   0 -19  -3 30270.6 595.526   2
   0  19   3 30843.2 427.210   1
  -3   0 -19 30983.2 536.102   2
   3   0 -19 31522.4 508.245   2
 -19  -3   0 30205.4 629.007   1
   0  19  -3 30816.4 547.091   1
  -3   0 -19 31271.8 603.304   1
 -19   3   0 30653.5 632.881   1
   3  -2 -19 2068.25 109.041   2
   2 -19  -3 2242.49 139.280   2
  -2 -19   3 2017.65 114.061   2
   2  19   3 2085.43 71.6661   1
  -3   2 -19 1837.91 130.367   1
  -3   2 -19 2076.57 102.102   2
  -2  19  -3 2268.03 119.316   1
 -19   3  -2 2030.63 143.276   1
  -4  19  -3 307.705 50.0434   1
   4 -19  -3 338.835 64.8055   2
 -19   3  -4 379.047 80.5479   1
   3  -4 -19 333.447 54.3567   2
  -4 -19   3 293.460 49.8983   2
  -3   4 -19 232.483 36.3733   2
  -3   4 -19 285.690 59.9532   1
 -19   3  -6 16203.7 437.013   1
  -6 -19   3 15774.8 362.197   2
  -6  19  -3 15788.9 360.044   1
  -3   6 -19 17151.0 278.669   2
   3  -6 -19 15972.9 382.486   2
  -3   6 -19 15889.1 433.221   1
  -8  19  -3 45389.8 749.186   1
   3  -8 -19 45086.7 789.340   2
 -19   3  -8 46498.1 854.735   1
  -8 -19   3 45964.0 750.363   2
  -3   8 -19 44661.9 853.970   1
   3 -10 -19 4537.79 209.860   2
 -19   3 -10 4213.29 219.933   1
 -10 -19   3 4696.35 189.106   2
  -3  10 -19 4373.61 230.831   1
 -10  19  -3 4085.08 181.007   1
   3 -10 -19 4267.15 139.347   1
  -3  12 -19 10443.2 373.406   1
 -19   3 -12 10635.1 365.652   1
 -12 -19   3 10609.0 309.248   2
   3 -12 -19 11153.7 354.697   2
 -12  19  -3 10461.2 315.525   1
   3 -14 -19 13261.1 410.756   2
  -3  14 -19 12822.2 434.259   1
 -19   3 -14 13312.0 426.273   1
 -14  19  -3 12991.5 374.419   1
 -14 -19   3 13134.0 365.527   2
   3 -16 -19 31665.2 718.607   2
 -16  19  -3 32209.3 676.887   1
 -19   3 -16 31606.8 727.562   1
  -3  16 -19 33613.5 767.374   1
   3 -18 -19 7730.54 335.804   2
 -18  19  -3 7354.51 299.782   1
 -19   3 -18 7538.56 331.161   1
  -3  18 -19 8032.93 354.269   1
 -19  -4 -17 16075.2 461.264   1
  -4 -17 -19 15554.3 490.054   2
  -4 -15 -19 5397.94 265.502   2
 -19  -4 -15 5103.59 245.156   1
 -19  -4 -13 7182.01 285.559   1
  -4 -13 -19 7907.54 309.335   2
 -13 -19  -4 7351.00 295.798   2
 -13  19   4 7743.75 234.420   1
 -19  -4 -11 1781.60 140.640   1
  -4 -11 -19 1899.06 146.711   2
 -11 -19  -4 1989.87 148.099   2
 -11  19   4 2059.03 107.114   1
  -9  19   4 12011.9 261.642   1
 -19  -4  -9 11643.9 359.829   1
  -4  -9 -19 12095.1 265.891   1
  -4  -9 -19 11859.4 358.582   2
  -9 -19  -4 11711.0 359.434   2
  -7  19   4 18729.4 322.478   1
  -7 -19  -4 17682.4 446.330   2
  -4  -7 -19 17911.2 439.422   2
  -4  -7 -19 18106.8 371.513   1
 -19  -4  -7 18595.5 460.593   1
  -5  19   4 13811.6 238.777   1
  -5 -19  -4 13337.7 368.791   2
  -4  -5 -19 13721.3 356.923   2
 -19   4   5 13520.8 385.715   1
 -19  -4  -5 13724.2 387.045   1
  -4  -5 -19 13657.4 325.224   1
  -3  19   4 263.347 23.4251   1
  -3 -19  -4 224.048 56.7742   2
  -4  -3 -19 220.024 48.8356   2
 -19   4   3 211.698 55.3915   1
  -4  -3 -19 245.614 52.8349   1
 -19  -4  -3 190.113 56.7248   1
  -1 -19  -4 22056.3 478.234   2
  -1  19   4 19972.5 270.961   1
  -4  -1 -19 21164.2 425.660   2
 -19  -4  -1 21163.2 494.937   1
  -4  -1 -19 21404.9 460.805   1
 -19   4   1 21222.6 498.370   1
   4  -1 -19 22633.1 404.690   2
  -1 -19   4 21273.8 418.691   2
   1 -19  -4 21963.2 482.241   2
  -4   1 -19 21828.6 483.478   1
  -4   1 -19 22143.0 416.389   2
  -1  19  -4 22039.2 439.503   1
 -19   4  -1 22347.5 508.421   1
   4  -3 -19 203.642 44.9228   2
 -19   4  -3 183.426 65.5372   1
  -3 -19   4 159.483 41.0409   2
   3 -19  -4 138.882 47.6488   2
   3  19   4 246.718 20.8883   1
  -4   3 -19 199.346 55.6586   1
  -4   3 -19 184.109 38.3090   2
  -3  19  -4 253.453 51.0569   1
   5 -19  -4 14116.5 386.189   2
   4  -5 -19 13950.0 344.878   2
  -5 -19   4 14376.1 325.167   2
  -4   5 -19 14627.5 281.277   2
 -19   4  -5 14192.4 403.350   1
  -5  19  -4 13942.0 338.261   1
  -4   5 -19 13465.0 390.237   1
   4  -7 -19 17841.5 425.354   2
 -19   4  -7 19063.0 483.914   1
  -7  19  -4 18446.9 410.326   1
  -7 -19   4 18943.3 394.113   2
  -4   7 -19 19341.9 310.035   2
  -4   7 -19 18371.5 480.634   1
   4  -9 -19 11396.1 339.748   2
  -4   9 -19 11693.8 380.904   1
  -9  19  -4 11876.2 323.644   1
 -19   4  -9 12190.6 382.429   1
  -9 -19   4 11643.6 302.851   2
   4 -11 -19 1776.97 138.117   2
 -19   4 -11 2226.03 163.983   1
 -11 -19   4 2198.73 129.604   2
 -11  19  -4 2183.81 138.773   1
  -4  11 -19 1899.65 158.225   1
   4 -13 -19 7237.82 290.777   2
 -19   4 -13 7260.72 304.291   1
 -13 -19   4 7378.20 251.126   2
 -13  19  -4 6735.75 258.662   1
  -4  13 -19 7397.27 315.219   1
   4 -15 -19 5385.87 261.538   2
 -15  19  -4 5108.01 236.718   1
  -4  15 -19 5821.92 286.640   1
 -19   4 -15 5414.19 270.428   1
 -15 -19   4 5760.39 230.247   2
   4 -17 -19 16472.1 495.655   2
  -4  17 -19 16344.5 515.306   1
 -17  19  -4 15091.4 447.047   1
 -19   4 -17 16172.3 498.460   1
 -19  -5 -18 532.426 90.1328   1
  -5 -18 -19 457.051 96.5254   2
 -19  -5 -16 15245.0 438.798   1
  -5 -16 -19 15290.6 473.547   2
  -5 -14 -19 32645.3 716.883   2
 -19  -5 -14 32189.2 679.919   1
 -14 -19  -5 31871.6 706.805   2
  -5 -12 -19 9029.48 329.497   2
 -19  -5 -12 8620.83 313.216   1
 -12 -19  -5 9306.10 330.116   2
 -19  -5 -10 2076.18 148.452   1
  -5 -10 -19 2018.28 150.396   2
 -10 -19  -5 1912.45 146.661   2
  -5  -8 -19 21314.8 402.291   1
  -8 -19  -5 20121.2 496.778   2
  -5  -8 -19 20889.4 493.138   2
 -19  -5  -8 20653.3 496.320   1
  -6 -19  -5 1428.27 120.399   2
  -5  -6 -19 1311.51 93.2970   1
  -5  -6 -19 1137.31 104.140   2
 -19  -5  -6 1485.97 125.050   1
  -4 -19  -5 14253.9 390.229   2
  -5  -4 -19 14316.1 365.203   2
 -19   5   4 14397.2 396.929   1
 -19  -5  -4 14390.6 395.427   1
  -5  -4 -19 14725.0 350.485   1
  -2 -19  -5 9491.34 303.428   2
  -5  -2 -19 9765.66 278.947   2
  -5  -2 -19 9586.46 283.275   1
 -19  -5  -2 9916.79 318.406   1
 -19   5   2 8998.46 307.577   1
   0 -19  -5 18970.5 451.879   2
  -5   0 -19 18672.6 437.352   1
  -5   0 -19 18569.2 398.193   2
 -19  -5   0 18783.1 467.205   1
 -19   5   0 18354.5 459.657   1
  -2 -19   5 9684.34 246.506   2
   2 -19  -5 8564.97 291.551   2
  -2  19  -5 9153.20 271.751   1
 -19   5  -2 9306.82 313.865   1
  -5   2 -19 9569.30 250.188   2
  -5   2 -19 9716.27 306.497   1
   5  -4 -19 14609.0 344.439   2
  -5   4 -19 14130.8 396.354   1
 -19   5  -4 14851.3 411.511   1
  -4 -19   5 15100.6 320.833   2
  -4  19  -5 14600.5 355.196   1
  -5   4 -19 14509.7 306.313   2
   4 -19  -5 14089.0 389.931   2
   5  -6 -19 990.296 92.4660   2
  -5   6 -19 959.148 107.440   1
  -6 -19   5 1111.13 81.3055   2
 -19   5  -6 1139.46 114.858   1
  -5   6 -19 1109.20 67.9302   2
  -6  19  -5 1037.17 91.7083   1
   5  -8 -19 22220.0 490.973   2
  -8  19  -5 21151.8 465.321   1
 -19   5  -8 22213.4 541.710   1
  -8 -19   5 22126.7 429.971   2
  -5   8 -19 21139.4 533.646   1
 -10  19  -5 2024.09 134.013   1
   5 -10 -19 2165.44 147.735   2
  -5  10 -19 1956.21 154.709   1
 -19   5 -10 2104.01 160.759   1
 -10 -19   5 2292.68 124.296   2
   5 -12 -19 9466.96 329.608   2
  -5  12 -19 9799.68 364.058   1
 -19   5 -12 9633.48 352.175   1
 -12 -19   5 9737.63 282.016   2
 -12  19  -5 9650.95 309.530   1
  -5  14 -19 32095.0 738.536   1
 -19   5 -14 32495.1 733.193   1
 -14 -19   5 33235.1 617.613   2
 -14  19  -5 30421.4 651.867   1
   5 -14 -19 31735.9 699.378   2
 -16  19  -5 15081.5 435.795   1
 -19   5 -16 15010.1 475.042   1
   5 -16 -19 15440.1 470.890   2
  -5  16 -19 16333.0 502.977   1
  -5  18 -19 578.714 103.893   1
   5 -18 -19 619.477 105.233   2
 -18  19  -5 480.482 86.6311   1
 -19   5 -18 594.884 110.973   1
 -19  -6 -17 875.099 110.904   1
  -6 -17 -19 948.672 126.005   2
 -19  -6 -15 2141.15 158.879   1
  -6 -15 -19 2364.61 182.107   2
 -15 -19  -6 2302.97 172.378   2
 -19  -6 -13 448.124 78.9166   1
  -6 -13 -19 500.706 86.8226   2
 -13 -19  -6 573.494 96.8660   2
  -6 -11 -19 1449.15 132.361   2
 -11 -19  -6 1453.12 133.281   2
 -19  -6 -11 1362.66 123.150   1
  -6  -9 -19 7302.45 280.629   2
  -9 -19  -6 7184.91 285.799   2
  -6  -9 -19 7704.49 207.669   1
 -19  -6  -9 7365.51 275.931   1
  -6  -7 -19 14321.1 322.138   1
  -7 -19  -6 13426.5 390.229   2
  -6  -7 -19 13007.9 374.176   2
 -19  -6  -7 13488.9 383.352   1
  -5 -19  -6 9409.17 311.478   2
  -6  -5 -19 9060.76 261.910   1
  -6  -5 -19 9687.83 301.241   2
 -19   6   5 9571.62 315.450   1
 -19  -6  -5 9258.65 309.086   1
  -3 -19  -6 9403.12 309.685   2
  -6  -3 -19 9513.63 286.357   2
 -19  -6  -3 9380.71 309.511   1
  -6  -3 -19 9423.04 276.858   1
 -19   6   3 8962.20 306.980   1
  -6  -1 -19 25584.1 528.582   1
  -1 -19  -6 25778.2 556.622   2
  -6  -1 -19 26064.2 508.848   2
 -19  -6  -1 25171.1 560.662   1
 -19   6   1 25802.8 565.126   1
 -19   6  -1 25394.6 568.181   1
   1 -19  -6 25849.6 555.501   2
  -6   1 -19 26314.8 548.515   1
  -1  19  -6 25210.8 518.557   1
   3 -19  -6 9364.84 309.132   2
 -19   6  -3 9414.98 317.839   1
  -3 -19   6 9660.18 239.190   2
  -6   3 -19 9567.54 311.910   1
  -3  19  -6 9046.35 278.164   1
   5 -19  -6 9574.34 320.871   2
  -5  19  -6 9864.34 293.285   1
  -5 -19   6 10192.4 246.384   2
 -19   6  -5 10403.6 341.834   1
  -6   5 -19 9398.37 322.809   1
   6  -7 -19 13900.5 368.530   2
  -7 -19   6 15258.4 320.591   2
 -19   6  -7 14602.3 422.197   1
  -7  19  -6 14366.5 370.314   1
  -6   7 -19 14906.8 425.577   1
   6  -9 -19 7287.29 265.647   2
  -9  19  -6 6950.43 251.979   1
  -9 -19   6 7097.92 213.446   2
 -19   6  -9 7268.90 295.303   1
  -6   9 -19 6830.44 287.841   1
   6 -11 -19 1700.76 135.382   2
 -11 -19   6 1994.69 113.305   2
 -19   6 -11 2022.38 160.098   1
  -6  11 -19 2151.18 167.128   1
 -11  19  -6 1985.00 139.443   1
   6 -13 -19 813.751 106.309   2
  -6  13 -19 695.930 114.605   1
 -13 -19   6 745.389 75.6367   2
 -19   6 -13 625.773 98.3493   1
 -13  19  -6 789.292 97.0247   1
   6 -15 -19 2032.28 165.127   2
 -19   6 -15 2165.30 178.581   1
 -15  19  -6 2031.16 154.720   1
  -6  15 -19 2126.14 177.580   1
   6 -17 -19 817.876 123.425   2
 -17  19  -6 642.007 99.1997   1
 -19   6 -17 796.538 117.968   1
  -6  17 -19 423.356 93.3008   1
 -19  -7 -18 1818.29 148.699   1
 -19  -7 -16 9644.58 340.934   1
  -7 -16 -19 10578.4 394.638   2
 -19  -7 -14 9150.72 324.087   1
  -7 -14 -19 9487.37 361.590   2
 -14 -19  -7 9792.19 367.204   2
  -7 -12 -19 5278.51 255.400   2
 -12 -19  -7 5019.21 249.140   2
 -19  -7 -12 4840.50 226.519   1
  -7 -10 -19 7399.26 289.340   2
 -10 -19  -7 6777.00 283.644   2
 -19  -7 -10 6952.02 268.839   1
  -8 -19  -7 4166.27 213.748   2
  -7  -8 -19 4169.67 208.052   2
  -7  -8 -19 4171.97 159.405   1
 -19  -7  -8 4123.21 204.057   1
  -7  -6 -19 2148.17 120.036   1
  -6 -19  -7 2264.38 154.751   2
  -7  -6 -19 2269.26 147.270   2
 -19   7   6 1984.48 144.026   1
 -19  -7  -6 2227.88 149.983   1
  -4 -19  -7 4529.95 216.027   2
  -7  -4 -19 4297.51 180.631   1
  -7  -4 -19 4277.74 197.203   2
 -19  -7  -4 4896.53 219.898   1
 -19   7   4 4985.19 223.680   1
  -2 -19  -7 543.954 81.5074   2
 -19  -7  -2 588.423 85.1157   1
  -7  -2 -19 610.970 72.7380   1
 -19   7   2 683.431 89.4550   1
  -7   0 -19 50.0564 41.1937   1
   0 -19  -7 43.5225 43.9735   2
 -19   7   0 13.0793 51.2402   1
  -2  19  -7 644.191 80.0977   1
 -19   7  -2 553.879 85.5884   1
   2 -19  -7 644.681 87.5816   2
  -7   2 -19 502.547 78.7475   1
  -4 -19   7 4861.39 153.085   2
 -19   7  -4 4605.29 222.431   1
  -7   4 -19 4602.02 216.760   1
  -4  19  -7 4629.65 200.918   1
   4 -19  -7 4575.36 217.466   2
  -6 -19   7 2274.74 103.782   2
 -19   7  -6 2042.27 153.790   1
  -7   6 -19 2115.34 156.253   1
   6 -19  -7 2075.02 150.495   2
  -6  19  -7 2162.47 136.236   1
  -8 -19   7 3778.99 141.339   2
 -19   7  -8 3834.15 212.004   1
  -7   8 -19 3792.50 209.765   1
  -8  19  -7 3728.10 184.006   1
   7 -10 -19 6595.49 261.824   2
 -10  19  -7 7252.71 266.897   1
 -10 -19   7 7288.51 209.515   2
 -19   7 -10 7331.17 300.861   1
  -7  10 -19 7374.32 304.200   1
   7 -12 -19 4904.01 236.616   2
  -7  12 -19 5415.17 267.801   1
 -19   7 -12 5096.85 257.149   1
 -12  19  -7 5442.32 237.286   1
   7 -14 -19 9319.89 347.037   2
  -7  14 -19 9373.18 365.827   1
 -19   7 -14 9806.19 370.162   1
 -14  19  -7 8807.54 321.830   1
   7 -16 -19 9697.03 371.742   2
  -7  16 -19 10227.1 394.918   1
 -16  19  -7 9910.23 357.481   1
 -19   7 -16 10677.5 394.759   1
 -18  19  -7 2322.43 179.693   1
 -19  -8 -17 901.094 107.326   1
  -8 -17 -19 1043.03 137.045   2
  -8 -15 -19 1993.90 172.350   2
 -15 -19  -8 2117.78 174.057   2
 -19  -8 -15 1937.75 146.817   1
  -8 -13 -19 2249.19 170.771   2
 -13 -19  -8 2165.59 170.948   2
 -19  -8 -13 2187.56 152.988   1
  -8 -11 -19 27688.5 640.102   2
 -11 -19  -8 28013.3 648.525   2
 -19  -8 -11 27083.2 593.217   1
  -9 -19  -8 2499.99 174.016   2
  -8  -9 -19 2607.79 123.683   1
  -8  -9 -19 2619.94 171.766   2
 -19  -8  -9 2595.31 160.116   1
  -7 -19  -8 9580.73 333.719   2
  -8  -7 -19 9024.34 315.834   2
 -19  -8  -7 9278.79 311.763   1
  -8  -7 -19 9727.62 266.320   1
  -8  -5 -19 29099.9 550.147   1
  -5 -19  -8 28339.2 617.696   2
  -8  -5 -19 29036.1 599.831   2
 -19  -8  -5 28106.6 600.048   1
 -19   8   5 28041.4 599.315   1
  -3 -19  -8 8815.32 309.550   2
  -8  -3 -19 8780.93 273.405   1
 -19   8   3 9446.10 311.585   1
 -19   8   1 775.910 97.0054   1
  -1 -19  -8 757.347 92.5404   2
  -8  -1 -19 993.157 93.7176   1
 -19   8  -1 855.712 103.711   1
   1 -19  -8 902.149 101.164   2
  -1  19  -8 736.194 84.0800   1
  -8   1 -19 727.415 86.0924   1
 -19   8  -3 9712.83 330.208   1
  -3  19  -8 10052.5 310.977   1
   3 -19  -8 10199.2 334.072   2
  -8   3 -19 10195.9 328.626   1
  -5 -19   8 29866.7 473.264   2
  -8   5 -19 29797.9 637.226   1
 -19   8  -5 28759.7 633.069   1
  -5  19  -8 28904.1 594.982   1
   5 -19  -8 29027.2 631.308   2
  -8   7 -19 9900.82 344.804   1
 -19   8  -7 10483.5 357.698   1
  -7  19  -8 10301.6 320.169   1
  -8   9 -19 2511.92 177.304   1
  -9  19  -8 2307.21 150.911   1
 -19   8  -9 2597.39 180.280   1
 -11  19  -8 28187.7 616.065   1
  -8  11 -19 28925.1 673.668   1
 -19   8 -11 29681.4 676.664   1
  -8  13 -19 3182.69 208.942   1
 -19   8 -13 2946.20 201.131   1
 -13  19  -8 2947.60 182.481   1
  -8  15 -19 2270.11 183.505   1
 -19   8 -15 2169.35 176.812   1
 -15  19  -8 2064.97 157.936   1
  -8  17 -19 1067.84 137.821   1
 -17  19  -8 927.837 117.664   1
 -19   8 -17 1166.72 135.361   1
  -9 -16 -19 3328.21 223.581   2
 -16 -19  -9 3706.45 236.373   2
 -19  -9 -16 3233.07 187.438   1
  -9 -14 -19 4928.16 264.133   2
 -14 -19  -9 4439.02 252.826   2
 -19  -9 -14 4628.81 224.023   1
  -9 -12 -19 3313.50 210.873   2
 -12 -19  -9 3289.65 210.470   2
 -19  -9 -12 3384.52 186.479   1
 -10 -19  -9 6335.66 283.339   2
  -9 -10 -19 5734.97 262.310   2
 -19  -9 -10 5924.80 245.229   1
  -8 -19  -9 6023.96 266.746   2
  -9  -8 -19 5872.55 200.550   1
  -9  -8 -19 5452.89 247.184   2
 -19  -9  -8 5839.18 242.024   1
  -6 -19  -9 3260.77 194.680   2
 -19   9   6 3760.18 193.436   1
 -19  -9  -6 3124.99 177.033   1
  -9  -6 -19 3457.02 160.649   1
  -9  -4 -19 8471.45 266.042   1
  -4 -19  -9 7668.88 296.328   2
 -19   9   4 8442.74 297.073   1
  -2 -19  -9 1184.32 114.440   2
  -9  -2 -19 960.924 91.7576   1
 -19   9   2 1227.65 115.647   1
 -19   9   0 1241.52 116.172   1
   0 -19  -9 1170.34 116.855   2
  -9   0 -19 1347.06 113.634   1
 -19   9  -2 1472.32 126.881   1
  -2  19  -9 1311.61 113.406   1
  -9   2 -19 1351.03 117.640   1
   2 -19  -9 1349.49 122.925   2
   4 -19  -9 8931.39 316.907   2
 -19   9  -4 8946.10 319.812   1
  -9   4 -19 8896.12 309.672   1
  -4  19  -9 8381.29 292.695   1
   6 -19  -9 3292.56 193.986   2
  -6  19  -9 3309.39 181.250   1
 -19   9  -6 3334.14 195.001   1
  -9   6 -19 3084.95 187.453   1
 -19   9  -8 6396.85 279.662   1
  -8  19  -9 5839.79 248.394   1
  -9   8 -19 6227.22 276.372   1
 -10  19  -9 5474.73 242.796   1
 -19   9 -10 5562.91 266.835   1
  -9  10 -19 5293.62 261.991   1
 -12  19  -9 3807.69 207.689   1
 -19   9 -12 3993.83 233.132   1
  -9  12 -19 4145.93 239.113   1
 -19   9 -14 5052.82 266.427   1
 -14  19  -9 4301.24 229.384   1
  -9  14 -19 4656.65 259.657   1
 -19   9 -16 4270.21 252.483   1
 -16  19  -9 4066.55 232.405   1
  -9  16 -19 4301.09 255.911   1
 -18  19  -9 1291.13 140.143   1
 -10 -15 -19 2382.23 191.248   2
 -15 -19 -10 2240.65 185.814   2
 -19 -10 -15 2102.23 149.239   1
 -10 -13 -19 8836.45 353.129   2
 -13 -19 -10 8786.08 356.757   2
 -19 -10 -13 8729.48 305.582   1
 -11 -19 -10 291.430 78.2247   2
 -10 -11 -19 324.964 79.1913   2
 -19 -10 -11 365.145 70.5296   1
 -10  -9 -19 5876.91 201.167   1
  -9 -19 -10 5742.71 269.707   2
 -10  -9 -19 5645.84 261.099   2
 -19 -10  -9 5069.37 226.494   1
  -7 -19 -10 10024.3 352.288   2
 -10  -7 -19 9955.99 282.675   1
 -19 -10  -7 9738.07 319.379   1
  -5 -19 -10 153.686 59.5167   2
 -19  10   5 65.5326 51.1198   1
[truncated: 170,307 more chars]
